# Supplementary material for: Divergent reaction: metal & oxidant free direct C–H aryloxylation and hydride free formal reductive N-benzylation of N-heterocycles
Source: Royal Society of Chemistry journal article supplement (doi:10.1039/c4ra05045b), 2014-01-01

## Electronic Supplementary Information (ESI):

# Divergent Reaction: Metal & Oxidant Free Direct C-H Aryloxylation and Hydride Free Formal Reductive *N*-benzylation of *N*-heterocycles

Sujit Mahato, Md Ashraful Haque, Soumita Dwari and Chandan K. Jana\*

Department of Chemistry, Indian Institute of Technology Guwahati, 781039-Guwahati, Assam,  
India

E-mail: ckjana@iitg.ernet.in

## Experimental Section:

**General:** All reactions involving air- or moisture-sensitive reagents or intermediates were carried out in oven-dried glassware under an argon atmosphere. Dichloromethane (CH<sub>2</sub>Cl<sub>2</sub>) was freshly distilled from phosphorus(V)oxide (P<sub>2</sub>O<sub>5</sub>). Triethylamine (Et<sub>3</sub>N) was distilled from CaH<sub>2</sub> and stored under argon. Commercial grade xylene, benzene and toluene were distilled before use. All other solvents and reagents were purified according to standard procedures or were used as received from Aldrich, Acros, Merck and Spectrochem. Microwave reactions were performed on CEM, Discover system. <sup>1</sup>H, <sup>13</sup>C NMR spectroscopy: *Varian Mercury plus 400 MHz, Bruker 600 MHz* (at 298 K). Chemical shifts, δ (in ppm), are reported relative to TMS δ (<sup>1</sup>H) 0.0 ppm, δ (<sup>13</sup>C) 0.0 ppm) which was used as the inner reference. Otherwise the solvents residual proton resonance and carbon resonance (CHCl<sub>3</sub>, δ (<sup>1</sup>H) 7.26 ppm, δ (<sup>13</sup>C) 77.2 ppm; CD<sub>3</sub>OD, (<sup>1</sup>H) 3.31 ppm, δ (<sup>13</sup>C) 49.0 ppm) were used for calibration. Column chromatography: Merck or Spectrochem silica gel 60-120 under gravity. IR: spectra were recorded on Perkin Elmer Instrument at normal temperature making KBr pellet grinding the sample with KBr (IR Grade). MS (ESI-HRMS): Mass spectra were recorded on a Agilent Accurate-Mass Q-TOF LC/MS 6520, and peaks are given in *m/z* (% of basis peak).

## Experimental procedure:

### General procedure for preparation of ketones: GPI<sup>1</sup>

2-naphthol (1.44 g, 10 mmol) in 10 mL of  $\text{BF}_3 \cdot \text{OEt}_2$  was heated at 60 °C to make it soluble. Then benzoic acid (1.1 eq) was added to it and resulting reaction mixture was heated at 100 °C for 20 h. Reaction mixture was cooled to room temperature and diluted with water (50 mL). Then the mixture was extracted with EtOAc ( $3 \times 30$  mL). Then the combined organic layers were dried ( $\text{Na}_2\text{SO}_4$ ) and concentrated in vacuum. The crude product was purified by  $\text{SiO}_2$ -gel column chromatography.

**(2-Hydroxy-naphthalen-1-yl)-phenyl-methanone (1b):**<sup>3</sup> According to GPI: 2-naphthol (1.44 g, 10.00 mmol), benzoic acid (1.34 g, 11.00 mmol) in 10 mL  $\text{BF}_3 \cdot \text{OEt}_2$  for 20 h and  $\text{SiO}_2$ - column chromatography (EtOAc : Hexane, 1 : 20) gave **1b** as orange yellow crystal (1.61 g, 65%). <sup>1</sup>H NMR (400 MHz,  $\text{CDCl}_3$ )  $\delta$  = 11.15 (s, 1H), 7.86 (d,  $J$  = 9.0 Hz, 1H), 7.68 (d,  $J$  = 8.0 Hz, 1H), 7.56 – 7.54 (m, 2H), 7.450 – 7.47 (m, 1H), 7.35 – 7.31 (m, 2H), 7.22 (t,  $J$  = 7.6 Hz, 2H), 7.17 (d,  $J$  = 8.9 Hz, 1H), 7.11 – 7.05 (m, 1H). LRMS (ESI) data calculated for  $\text{C}_{17}\text{H}_{11}\text{O}_2^-$   $[\text{M}-\text{H}]^-$  : 247.07 ; found : 247.17

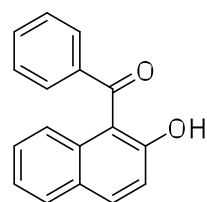

**(2-Hydroxy-naphthalen-1-yl)-(4-methoxy-phenyl)-methanone (3a):**<sup>2</sup> According to GPI: 2-naphthol (0.57 g, 4.00 mmol), 4-Methoxy-benzoic acid (0.66 g, 4.40 mmol) in 4 mL  $\text{BF}_3 \cdot \text{OEt}_2$  for 20 hrs and  $\text{SiO}_2$ -column chromatography (EtOAc : Hexane, 1 : 15) gave **3a** as yellow crystal, (0.49 g, 44 %). <sup>1</sup>H NMR (600 MHz,  $\text{CDCl}_3$ )  $\delta$  = 10.59 (s, 1H), 7.91 (d,  $J$  = 9.0 Hz, 1H), 7.76 – 7.75 (m, 1H), 7.66 – 7.63 (m, 2H), 7.42 – 7.41 (d,  $J$  = 8.5 Hz, 1H), 7.29 – 7.27 (m, 1H), 7.23 (d,  $J$  = 9.0 Hz, 1H), 7.21 – 7.18 (m, 1H), 6.89 – 6.86 (m, 2H), 3.86 (s, 3H). LRMS (ESI) data calculated for  $\text{C}_{18}\text{H}_{13}\text{O}_3^-$   $[\text{M}-\text{H}]^-$  : 277.08 ; found : 277.20

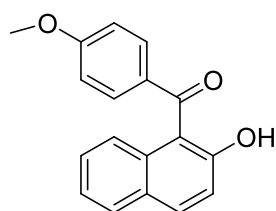

**(2-Hydroxy-naphthalen-1-yl)-p-tolyl-methanone (3b):** According to GPI: 2-naphthol(0.57 g, 4.00 mmol), 4-Methyl-benzoic acid (0.59 g, 4.40 mmol) in 4 mL  $\text{BF}_3 \cdot \text{OEt}_2$  for 20 hrs and  $\text{SiO}_2$ -column chromatography (EtOAc : Hexane, 1 : 30) gave **3b** as yellow crystal, (0.430 gm, 41%). <sup>1</sup>H NMR (400 MHz,  $\text{CDCl}_3$ )  $\delta$  = 10.99 (s, 1H), 7.91 (d,  $J$  = 9.0 Hz, 1H), 7.74 (d,  $J$  = 8.0 Hz, 1H), 7.55 – 7.53

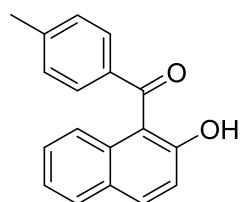

(m, 2H), 7.37 – 7.34 (m, 1H), 7.28 – 7.22 (m, 2H), 7.19 – 7.15 (m, 3H), 2.40 (s, 3H). <sup>13</sup>C NMR (101 MHz, CDCl<sub>3</sub>) δ = 200.1, 160.9, 143.9, 137.7, 136.0, 132.6, 129.9, 129.4, 128.7, 128.6, 126.8, 126.5, 123.8, 119.3, 114.9, 21.9. LRMS (ESI) data calculated for C<sub>18</sub>H<sub>13</sub>O<sub>2</sub><sup>-</sup> [M-H]<sup>-</sup> : 261.09 ; found : 261.19

**(2-hydroxynaphthalen-1-yl)(4-hydroxyphenyl)methanone (3c):**<sup>1</sup> According to GPI: 2-

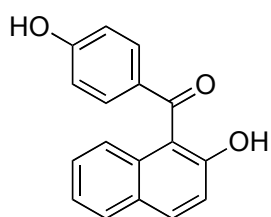

naphthol (0.58 g, 4.00 mmol), 4-hydroxy benzoic acid (0.61 g, 4.40 mmol) in 4 mL BF<sub>3</sub>.OEt<sub>2</sub> for 16 h. and SiO<sub>2</sub> column chromatography (EtOAc : Hexane, 1 : 20) gave **3c** as whitish solid (0.42 g, 40%). <sup>1</sup>H NMR (400 MHz, CDCl<sub>3</sub>) δ = 10.66 (s, 1H), 7.92 (d, *J* = 9.0 Hz, 1H), 7.76 (d, *J* = 8.0 Hz, 1H), 7.63 – 7.59 (m, 2H), 7.43 – 7.41(m, 1H), 7.29 (t, *J* = 7.4 Hz, 1H), 7.25 – 7.23 (m, 1H), 7.21 – 7.19 (m, 1H), 6.84 – 6.80 (m, 2H). LRMS (ESI) data calculated for C<sub>17</sub>H<sub>11</sub>O<sub>3</sub><sup>-</sup> [M-H]<sup>-</sup> : 263.07 ; found : 263.17

**(4-Chloro-phenyl)-(2-hydroxy-naphthalen-1-yl)-methanone (3d):**<sup>3</sup> According to GPI: 2-

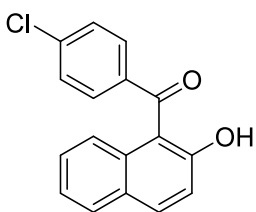

naphthol (0.28 g, 2.0 mmol), 4-Chloro-benzoic acid (0.34 g, 2.20 mmol) in 2 mL BF<sub>3</sub>.OEt<sub>2</sub> for 52 h and SiO<sub>2</sub>-column chromatography (EtOAc : Hexane 1 : 30) gave **3d** as brown solid (70 mg, 12%). <sup>1</sup>H NMR (400 MHz CDCl<sub>3</sub>) δ = 11.09 (s, 1H), 7.94 (d, *J* = 9.0 Hz, 1H), 7.77 – 7.75 (m, 1H), 7.59 – 7.57 (m, 2H), 7.39 – 7.37 (m, 2H), 7.31 – 7.28 (m, 2H), 7.26 – 7.18 (m, 2H). LRMS (ESI) data calculated for C<sub>17</sub>H<sub>10</sub>ClO<sub>2</sub><sup>-</sup> [M-H]<sup>-</sup> : 281.03 ; found : 281.14

**(2-Hydroxy-7-methoxy-naphthalen-1-yl)-phenyl-methanone (3e):** According to GPI: 7-

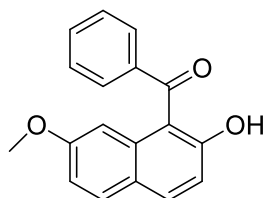

Methoxy-naphthalen-2-ol (0.52 g, 3.00 mmol), benzoic acid (0.40 g, 3.30 mmol) in 3 mL BF<sub>3</sub>.OEt<sub>2</sub> for 16 hrs and SiO<sub>2</sub>-column chromatography (EtOAc : Hexane, 1 : 20) gave **3e** as yellow solid (0.43 g, 51%). <sup>1</sup>H NMR (400 MHz, CDCl<sub>3</sub>) δ = 11.66 (s, 1H), 7.86 – 7.84 (m, 1H), 7.63 – 7.61 (m, 3H), 7.57 – 7.53 (m, 1H), 7.45 – 7.42 (m, 2H), 7.08 (d, *J* = 8.9 Hz, 1H), 6.89 – 6.88 (m, 1H), 6.59 (s, 1H), 3.27 (s, 3H). <sup>13</sup>C NMR (101 MHz, CDCl<sub>3</sub>) δ = 200.9, 163.0, 158.3, 141.0, 136.7, 134.3, 132.39, 130.2, 129.3, 128.8, 123.9, 116.7, 116.1, 113.8, 106.7, 54.6. LRMS (ESI) data calculated for C<sub>18</sub>H<sub>13</sub>O<sub>3</sub><sup>-</sup> [M-H]<sup>-</sup> : 277.08 ; found : 277.19

**(6-Bromo-2-hydroxy-naphthalen-1-yl)-phenyl-methanone (3f):** According to GPI: 6-Bromo-naphthalen-2-ol (0.44 g, 2.00 mmol), benzoic acid (0.26 g, 2.20 mmol) in 2

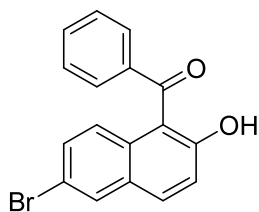

mL  $\text{BF}_3 \cdot \text{OEt}_2$  for 16 hrs and  $\text{SiO}_2$ -column chromatography (EtOAc : Hexane, 1 : 15) gave **3f** as reddish brown, (0.15 g, 23%).  $^1\text{H NMR}$  (400 MHz,  $\text{CDCl}_3$ )  $\delta$  = 11.13 (s, 1H), 7.86 (s, 1H), 7.80 (d,  $J$  = 8 Hz, 1H), 7.60 – 7.54 (m, 3H), 7.41 – 7.38 (m, 2H), 7.25 – 7.18 (m, 2H), 7.14 – 7.12 (m, 1H). LRMS (ESI) data calculated for  $\text{C}_{17}\text{H}_{10}\text{BrO}_2^-$   $[\text{M}-\text{H}]^-$  : 324.99 ; found : 325.10

**Table s1.** Screening of reaction condition and carbonyl compounds for direct C-H functionalization.<sup>[a]</sup>

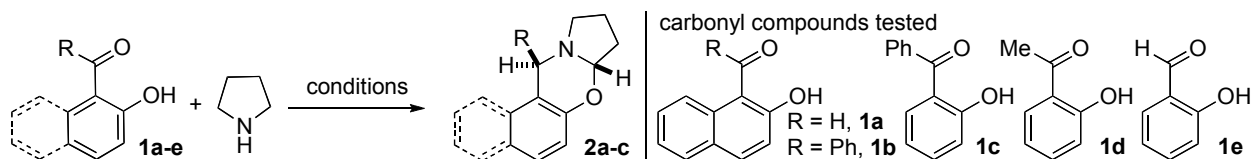

| Entry            | Carbonyl compound (eq.) | Solvent | Temperature            | Reaction time | Additives             | Isolated yield (%) |
|------------------|-------------------------|---------|------------------------|---------------|-----------------------|--------------------|
| 1                | <b>1a</b> (0.5)         | benzene | reflux                 | 12 h          | --                    | 8                  |
| 2                | <b>1a</b> (0.5)         | benzene | $\mu\text{w}$ , 100 °C | 10 min        | --                    | 38                 |
| 3 <sup>[b]</sup> | <b>1a</b> (0.5)         | benzene | $\mu\text{w}$ , 100 °C | 20 min        | --                    | 42                 |
| 4                | <b>1a</b> (0.5)         | benzene | $\mu\text{w}$ , 100 °C | 20 min        | DBU                   | 25                 |
| 5                | <b>1a</b> (0.5)         | benzene | $\mu\text{w}$ , 100 °C | 20 min        | $\text{MgSO}_4$       | 15                 |
| 6                | <b>1a</b> (0.3)         | ethanol | $\mu\text{w}$ , 100 °C | 20 min        | --                    | 15                 |
| 7                | <b>1a</b> (0.5)         | xylene  | $\mu\text{w}$ , 170 °C | 20 min        | 4Å MS                 | 40                 |
| 8                | <b>1a</b> (2.5)         | benzene | $\mu\text{w}$ , 100 °C | 20 min        | --                    | 65                 |
| 9                | <b>1a</b> (2.5)         | toluene | $\mu\text{w}$ , 130 °C | 20 min        | --                    | 72                 |
| 10               | <b>1a</b> (2.5)         | toluene | $\mu\text{w}$ , 130 °C | 40 min        | --                    | 72                 |
| 11               | <b>1a</b> (2.5)         | toluene | $\mu\text{w}$ , 130 °C | 20 min        | KOAc                  | 39                 |
| 12               | <b>1a</b> (2.5)         | toluene | $\mu\text{w}$ , 130 °C | 20 min        | PTSA                  | 15                 |
| 13               | <b>1a</b> (2.5)         | toluene | $\mu\text{w}$ , 130 °C | 20 min        | $\text{Et}_3\text{N}$ | 70                 |
| 14               | <b>1b</b> (1.2)         | toluene | $\mu\text{w}$ , 130 °C | 20 min        | --                    | 86                 |
| 15               | <b>1b</b> (1.2)         | toluene | $\mu\text{w}$ , 145 °C | 20 min        | --                    | 96                 |
| 16               | <b>1b</b> (1.2)         | toluene | reflux                 | 24 h          | --                    | 49                 |
| 17               | <b>1c</b> (1.2)         | toluene | $\mu\text{w}$ , 145 °C | 20 min        | --                    | 43 <sup>[c]</sup>  |
| 18               | <b>1d</b> (1.0)         | toluene | $\mu\text{w}$ , 145 °C | 20 min        | --                    | --                 |
| 19               | <b>1e</b> (1.0)         | xylene  | $\mu\text{w}$ , 130 °C | 20 min        | --                    | --                 |

[a] Reactions were carried out using 0.24 mmol of pyrrolidine in 1.5 mL of solvents. [b] 23% of reduced product was isolated along with oxazine. [c] diastereomeric ratio 3:1 was determined from  $^1\text{H NMR}$  spectroscopy.

## General procedure for the preparation of Oxazine : GP II

Aldehyde (2.5 eq) or ketone (0.29 mmol, 1.2 eq), toluene (1.5 mL) and amine (0.24 mmol, 1.0 eq) were added successively to an oven dried microwave reaction tube containing a stirring bar. Then the tube was sealed with cap and resulting solution was heated at 145 °C for 20 min under microwave irradiation (200 watt). Then the reaction mixture was cooled to room temperature. After that the crude mixture was transferred to round bottom flask with DCM. Then the volatiles were removed under vacuum to give gummy liquid. The liquid was subjected to SiO<sub>2</sub>-gel column chromatography to afford analytically pure oxazine.

### 8,9,10,12-tetrahydro-7aH-naphtho[1,2-e]pyrrolo[2,1-b][1,3]oxazine (**2a**):<sup>5</sup>

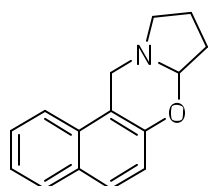

II: 2-Hydroxy naphthaldehyde (0.10 g, 0.60 mmol), pyrrolidine (20  $\mu$ L, 0.24 mmol) in 1 mL of toluene 130 °C under microwave irradiation for 20 min and SiO<sub>2</sub> column chromatography (EtOAc : Hexane, 1 : 30) gave **2a** brown solid (39 mg, 72%). <sup>1</sup>H NMR (600 MHz, CDCl<sub>3</sub>)  $\delta$  = 7.77 – 7.76 (m, 1H), 7.64 – 7.63 (m, 2H), 7.49 – 7.46 (m, 1H), 7.36 – 7.34 (m, 1H), 7.01 (d,  $J$  = 8.9 Hz, 1H), 5.14 – 5.13 (m, 1H), 4.62 (d,  $J$  = 16.9 Hz, 1H), 4.28 (d,  $J$  = 17.0 Hz, 1H), 3.15 (td,  $J$  = 8.6, 3.1 Hz, 1H), 2.97 (q,  $J$  = 8.4 Hz, 1H), 2.24 – 2.14 (m, 2H), 2.09 – 1.96 (m, 2H). HRMS exact mass calculated for C<sub>15</sub>H<sub>16</sub>NO<sup>+</sup> ([M+H]<sup>+</sup>) : 226.1226; Found : 226.1245.

### *rac*-(7aS,12R)-12-phenyl-8,9,10,12-tetrahydro-7aH-naphtho[1,2-e]pyrrolo[2,1-

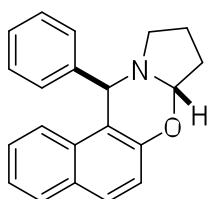

**b**][1,3]oxazine (**2b**): According to GP II: Pyrrolidine (20  $\mu$ L, 0.24 mmol), (2-hydroxynaphthalen-1-yl)(phenyl)methanone (72 mg, 0.29 mmol) in 1 mL of toluene 145 °C under microwave irradiation for 20 min and SiO<sub>2</sub> column chromatography (EtOAc : Hexane, 1 : 40) gave **2b**<sup>4,5</sup> as white solid (69 mg, 96%). <sup>1</sup>H NMR (400 MHz, CDCl<sub>3</sub>)  $\delta$  = 7.70 – 7.67 (m, 1H), 7.65 (d,  $J$  = 9.0 Hz, 1H), 7.33 – 7.29 (m, 1H), 7.21 – 7.13 (m, 7H), 7.00 (d,  $J$  = 8.9 Hz, 1H), 5.38 (s, 1H), 5.02 – 4.99 (m, 1H), 3.29 – 3.22 (m, 1H), 2.84 (q,  $J$  = 8.3 Hz, 1H), 2.03 – 1.89 (m, 4H). HRMS exact mass calculated for C<sub>21</sub>H<sub>20</sub>NO<sup>+</sup> ([M+H]<sup>+</sup>) : 302.1539; Found : 302.1533.

**9-phenyl-2,3,3a,9-tetrahydro-1H-benzo[e]pyrrolo[2,1-b][1,3]oxazine (2c):** According to GP

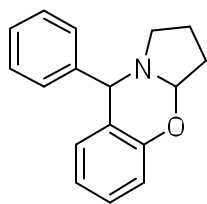

II: 2-Hydroxy benzophenone (48  $\mu\text{L}$ , 0.29 mmol), pyrrolidine (20  $\mu\text{L}$ , 0.24 mmol) in 1 mL of toluene 145  $^{\circ}\text{C}$  under microwave irradiation for 20 min and  $\text{SiO}_2$  column chromatography (EtOAc : Hexane, 1 : 40) gave diastereomeric mixture (3:1) of **2c**<sup>4</sup> as colorless oil (26 mg, 43%). <sup>1</sup>H NMR (600 MHz,  $\text{CDCl}_3$ )  $\delta$  = 7.33 – 7.14 (m, 6H), 6.97 – 6.95 (m, 1H), 6.88 – 6.84 (m, 2H),

5.01 – 5.00 (m, 1H), 4.95 (s, 1H), 3.31 – 3.26 (m, 1H), 2.95 – 2.88 (m, 1H), 2.10 – 1.90 (m, 4H).

HRMS exact mass calculated for  $\text{C}_{17}\text{H}_{18}\text{NO}^+$  ( $[\text{M}+\text{H}]^+$ ) : 252.1383; Found : 252.1385

**rac-(7aS,12R)-12-(4-methoxyphenyl)-8,9,10,12-tetrahydro-7aH-naphtho[1,2-e]pyrrolo[2,1-**

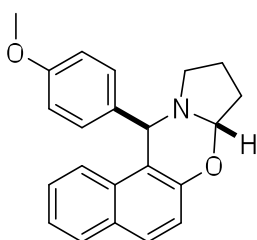

**b][1,3]oxazine (4a):** According to GP II: Pyrrolidine (40  $\mu\text{L}$ , 0.49 mmol), (2-hydroxynaphthalen-1-yl)(4-methoxyphenyl)methanone (0.16 g, 0.58 mmol) in 1.5 mL of toluene 145  $^{\circ}\text{C}$  under microwave irradiation for 20 min,  $\text{SiO}_2$  column chromatography (EtOAc : Hexane 1 : 40) gave **4a**<sup>4, 5</sup> as whitish solid (0.12 g, 74%). <sup>1</sup>H NMR (400 MHz,  $\text{CDCl}_3$ )  $\delta$  =

7.75 – 7.73 (m, 1H), 7.70 (d,  $J$  = 8.9 Hz, 1H), 7.41 – 7.37 (m, 1H), 7.31 – 7.23 (m, 2H), 7.17 – 7.15 (m, 2H), 7.06 (d,  $J$  = 8.9 Hz, 1H), 6.81 – 6.77 (m, 2H), 5.40 (s, 1H), 5.09 – 5.08 (m, 1H), 3.74 (s, 3H), 3.34 – 3.27 (m, 1H), 2.91 – 2.85 (m, 1H), 2.14 – 1.93 (m, 4H). HRMS exact mass calculated for  $\text{C}_{22}\text{H}_{22}\text{NO}_2^+$  ( $[\text{M}+\text{H}]^+$ ) : 332.1645; Found : 332.1660.

**rac-(7aS,12R)-12-p-tolyl-8,9,10,12-tetrahydro-7aH-naphtho[1,2-e]pyrrolo[2,1-**

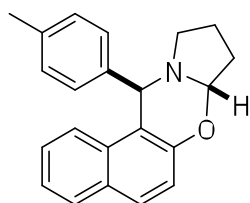

**b][1,3]oxazine (4b):** According to GP II: Pyrrolidine (40  $\mu\text{L}$ , 0.49 mmol), 2-hydroxynaphthalen-1-yl)(p-tolyl)methanone (0.15 g, 0.58 mmol) in 1.5 mL of toluene 145  $^{\circ}\text{C}$  under microwave irradiation for 20 min,  $\text{SiO}_2$  column chromatography (EtOAc : Hexane, 1 : 40) gave **4b**<sup>4,5</sup> as white solid

(92 mg, 61%). <sup>1</sup>H NMR (400 MHz,  $\text{CDCl}_3$ )  $\delta$  = 7.62 (d,  $J$  = 7.7 Hz, 1H), 7.58 (d,  $J$  = 9.0 Hz, 1H), 7.30 – 7.27 (m, 1H), 7.17 – 7.11 (m, 2H), 7.04 – 7.02 (m, 2H), 6.98 – 6.94 (m, 3H), 5.30 (s, 1H), 5.00 – 4.98 (m, 1H), 3.19 (t,  $J$  = 7.6 Hz, 1H), 2.78 (q,  $J$  = 8.2 Hz, 1H), 2.17 (s, 3H), 2.01 – 1.82 (m, 4H). HRMS exact mass calculated for  $\text{C}_{22}\text{H}_{22}\text{NO}^+$  ( $[\text{M}+\text{H}]^+$ ) : 316.1696; Found : 316.1773.

***rac*-4-((7a*S*,12*R*)-8,9,10,12-tetrahydro-7a*H*-naphtho[1,2-*e*]pyrrolo[2,1-*b*][1,3]oxazin-12-**

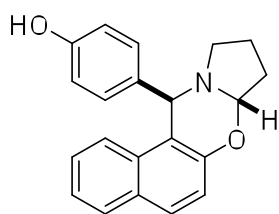

**yl)phenol (4c):** According to GP II: Pyrrolidine (30  $\mu$ L, 0.36 mmol), 2-hydroxynaphthalen-1-yl)(4-hydroxyphenyl)methanone (0.12 g, 0.44 mmol) in 1.5 mL of toluene and 1 mL xylene 145  $^{\circ}$ C under microwave irradiation for 40 min, SiO<sub>2</sub> column chromatography (EtOAc : Hexane, 1 : 10) gave **4c** as white solid (55 mg, 52%). FTIR (KBr):  $\tilde{\nu}$  = 3441, 2917, 2850, 1625, 1568, 1432, 1421, 1229, 991, 899, 816, 668 cm<sup>-1</sup>. <sup>1</sup>H NMR (400 MHz, CDCl<sub>3</sub> with added Methanol-*d*<sub>4</sub>)  $\delta$  = 7.64 (d, *J* = 7.6 Hz, 1H), 7.60 (d, *J* = 9.1 Hz, 1H), 7.30 (d, *J* = 8.0 Hz, 1H), 7.19 – 7.13 (m, 2H), 6.99 – 6.94 (m, 3H), 6.63 – 6.61 (m, 2H), 5.29 (s, 1H), 5.02 – 5.01 (m, 1H), 3.24 – 3.17 (m, 1H), 2.81 – 2.75 (m, 1H), 2.01 – 1.90 (m, 4H). <sup>13</sup>C NMR (101 MHz, CDCl<sub>3</sub> with added Methanol-*d*<sub>4</sub>)  $\delta$  = 155.7, 150.9, 134.0, 132.0, 129.5, 128.7, 128.4, 128.0, 125.9, 122.6, 122.3, 118.1, 114.7, 110.3, 85.5, 55.6, 49.6, 31.4, 20.3. HRMS exact mass calculated for C<sub>21</sub>H<sub>20</sub>NO<sub>2</sub><sup>+</sup> ([M+H]<sup>+</sup>): 318.1489; Found : 318.1488

***rac*-(7a*S*,12*R*)-12-(4-chlorophenyl)-8,9,10,12-tetrahydro-7a*H*-naphtho[1,2-*e*]pyrrolo[2,1-**

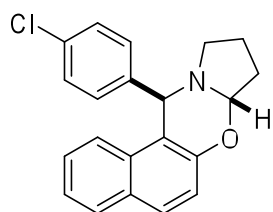

**b][1,3]oxazine (4d):** According to GP II: Pyrrolidine (16  $\mu$ L, 0.19 mmol), (4-chlorophenyl)(2-hydroxynaphthalen-1-yl)methanone (66 mg, 0.24 mmol) in 1 mL of toluene 145  $^{\circ}$ C under microwave irradiation for 40 min, SiO<sub>2</sub> column chromatography (EtOAc : Hexane, 1 : 40) gave **4d**<sup>4,5</sup> as light yellow solid (44 mg, 67%). <sup>1</sup>H NMR (600 MHz, CDCl<sub>3</sub>)  $\delta$  = 7.77 – 7.73 (m, 1H), 7.71 (d, *J* = 8.9 Hz, 1H), 7.32 (d, *J* = 7.8 Hz, 1H), 7.31 – 7.26 (m, 2H), 7.23 – 7.20 (m, 2H), 7.18 – 7.16 (m, 2H), 7.06 (d, *J* = 8.9 Hz, 1H), 5.40 (s, 1H), 5.01 – 4.99 (m, 1H), 3.31 (td, *J* = 8.3, 3.1 Hz, 1H), 2.90 (q, *J* = 8.3 Hz, 1H), 2.13 – 2.06 (m, 1H), 2.06 – 1.95 (m, 3H). HRMS exact mass calculated for C<sub>21</sub>H<sub>19</sub>ClNO<sup>+</sup> ([M+H]<sup>+</sup>): 336.1150; Found : 336.1156

***rac*-(7a*S*,12*R*)-2-methoxy-12-phenyl-8,9,10,12-tetrahydro-7a*H*-naphtho[1,2-*e*]pyrrolo[2,1-**

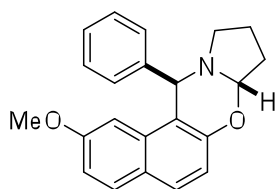

**b][1,3]oxazine (4e):** According to GP II: Pyrrolidine (30  $\mu$ L, 0.36 mmol), (2-hydroxy-7-methoxynaphthalen-1-yl)(phenyl)methanone (0.12 g, 0.44 mmol) in 1.5 mL of toluene 145  $^{\circ}$ C under microwave irradiation for 40 min, crystallization and after washing (10 X 1 mL of cold EtOAc : Hexane, 1 : 30) gave **4e**<sup>4</sup> as white solid (94 mg, 78%). <sup>1</sup>H

NMR (400 MHz CDCl<sub>3</sub>)  $\delta$  = 7.65 – 7.60 (m, 2H), 7.27 – 7.21 (m, 5H), 6.94 – 6.90 (m, 2H), 6.63 (s, 1H), 5.33 (s, 1H), 5.13 – 5.09 (m, 1H), 3.61 (s, 3H), 3.38 – 3.29 (m, 1H), 2.97 – 2.91 (m, 1H), 2.16 – 1.92 (m, 4H). HRMS exact mass calculated for C<sub>22</sub>H<sub>22</sub>NO<sub>2</sub><sup>+</sup> ([M+H]<sup>+</sup>) : 332.1645; Found: 332.1654

***rac*-(7aS,12R)-3-bromo-12-phenyl-8,9,10,12-tetrahydro-7aH-naphtho[1,2-e]pyrrolo[2,1-**

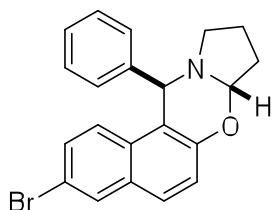

**b][1,3]oxazine (4f):** According to GP II: Pyrrolidine (20  $\mu$ L, 0.24 mmol), (6-bromo-2-hydroxynaphthalen-1-yl)(phenyl)methanone (95 mg, 0.29 mmol) in 1 mL of toluene 145 °C under microwave irradiation for 20 min and SiO<sub>2</sub> column chromatography (EtOAc : Hexane, 1 : 40) gave **4f**<sup>4</sup> as brown solid (70 mg, 75%). <sup>1</sup>H NMR (600 MHz, CDCl<sub>3</sub>)  $\delta$  =

7.89 – 7.87 (m, 1H), 7.61 (d,  $J$  = 9.0 Hz, 1H), 7.33 (dd,  $J$  = 9.0, 2.0 Hz, 1H), 7.28 – 7.20 (m, 6H), 7.08 (d,  $J$  = 9.0 Hz, 1H), 5.40 (s, 1H), 5.07 – 5.06 (m, 1H), 3.35 – 3.32 (m, 1H), 2.91 – 2.87 (m, 1H), 2.11 – 1.98 (m, 4H). HRMS exact mass calculated for C<sub>21</sub>H<sub>19</sub>BrNO<sub>2</sub><sup>+</sup> ([M+H]<sup>+</sup>) : 380.0645; Found : 380.0639

***rac*-(7aS,13R)-13-phenyl-7a,8,9,10,11,13-hexahydronaphtho[1,2-e]pyrido[2,1-b][1,3]oxazine**

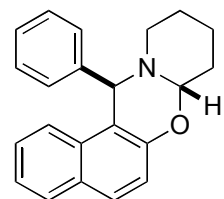

**(4g):** According to GP II: Piperidine (30  $\mu$ L, 0.30 mmol), (2-hydroxynaphthalen-1-yl)(phenyl)methanone (90 mg, 0.36 mmol) in 1 mL of toluene 145 °C under microwave irradiation for 40 min and SiO<sub>2</sub> column chromatography (EtOAc : Hexane, 1 : 40) gave **4g**<sup>4,5</sup> as white solid (43 mg, 45%). <sup>1</sup>H NMR (600 MHz, CDCl<sub>3</sub>)  $\delta$  = 7.77 – 7.76 (m, 1H), 7.73 (d,  $J$  = 8.8 Hz, 1H), 7.37 – 7.34 (m, 1H), 7.28 – 7.23 (m, 7H), 7.14 – 7.12 (m, 1H), 5.17 (s, 1H), 4.90 – 4.88 (m, 1H), 2.87 – 2.83 (m, 2H), 1.98 – 1.95 (m, 1H), 1.81 – 1.72 (m, 3H), 1.60 – 1.97 (m, 2H). HRMS exact mass

calculated for C<sub>22</sub>H<sub>22</sub>NO<sup>+</sup> ([M+H]<sup>+</sup>) : 316.1696; Found : 316.1696

**Oxazine (4h):** According to GP II: 1,2,3,4-tetrahydroisoquinoline (42  $\mu$ L, 0.33 mmol), (2-hydroxynaphthalen-1-yl)(phenyl)methanone (0.10 g, 0.40 mmol) in 1.5 mL of toluene 20 min 145 °C under microwave irradiation and SiO<sub>2</sub> column chromatography (EtOAc : Hexane, 1 : 40) gave **4h** as white solid (81 mg, 66%). FTIR (KBr):  $\tilde{\nu}$  = 2921, 2855, 1621, 1597, 1463, 1402, 1257, 1235, 1137, 1091, 1067, 985, 878, 857, 748, 725, 698 cm<sup>-1</sup>. <sup>1</sup>H NMR (400 MHz, CDCl<sub>3</sub>)  $\delta$  = 7.78 (d,  $J$  = 6.8 Hz, 1H), 7.73 (d,  $J$  = 9.0 Hz, 1H), 7.43 – 7.41 (m,

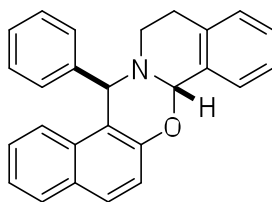



1H), 7.31 – 7.30 (m, 7H), 7.24 – 7.18 (m, 4H), 7.11 (d,  $J = 9.0$  Hz, 1H), 5.65 (s, 1H), 5.43 (s, 1H), 3.40 – 3.24 (m, 2H), 3.11 – 3.08 (m, 1H), 2.89 – 2.85 (m, 1H).  $^{13}\text{C}$  NMR (101 MHz,  $\text{CDCl}_3$ )  $\delta = 152.2, 142.6, 135.2, 133.3, 132.6, 129.5, 129.3, 129.1, 129.0, 128.98, 128.96, 128.8, 128.5, 127.6, 126.8, 126.4, 123.3, 122.9, 119.1, 111.1, 82.4, 62.9, 45.6, 29.6$ . HRMS (ESI) exact mass calculated for  $\text{C}_{26}\text{H}_{22}\text{NO}^+$  ( $[\text{M}+\text{H}]^+$ ): 364.1696. Found: 364.1684.

***rac*-(7a*S*,13*R*)-13-Phenyl-7a,8,9,10,11,12-hexahydro-13H-7-oxa-12a-aza-cyclohepta**

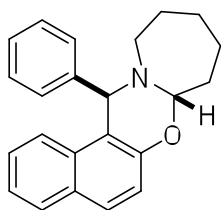

**[b]phenanthrene (4i):** According to GP II: Hexamethyleneimine (30  $\mu\text{L}$ , 0.26 mmol), (2-hydroxynaphthalen-1-yl)(phenyl)methanone (79 mg, 0.32 mmol) in 1 mL of toluene  $145^\circ\text{C}$  under microwave irradiation for 40 min  $\text{SiO}_2$  and column chromatography (EtOAc : Hexane, 1 : 40) gave **4i**<sup>4,5</sup> as white solid (57 mg, 66%).  $^1\text{H}$  NMR (600 MHz,  $\text{CDCl}_3$ )  $\delta = 7.75 - 7.74$  (m, 1H), 7.71 (d,  $J = 8.9$  Hz, 1H), 7.34 – 7.33 (m, 1H), 7.28 – 7.24 (m, 6H), 7.22 – 7.19 (m, 1H), 7.10 (dd,  $J = 8.9, 2.0$  Hz, 1H), 5.29 (s, 1H), 4.87 – 4.85 (m, 1H), 3.26 – 3.22 (m, 1H), 2.69 – 2.67 (m, 1H), 2.22 – 2.17 (m, 1H), 1.89 – 1.82 (m, 2H), 1.78 – 1.71 (m, 2H), 1.67 – 1.64 (m, 1H), 1.50 – 1.44 (m, 1H), 1.43 – 1.35 (m, 1H). HRMS exact mass calculated for  $\text{C}_{23}\text{H}_{24}\text{NO}^+$  ( $[\text{M}+\text{H}]^+$ ) : 330.1852; Found : 330.1822

**Oxazine (4j):** According to GP II: Heptamethyleneimine (40  $\mu\text{L}$ , 0.31 mmol), (2-hydroxynaphthalen-1-yl)(phenyl)methanone (94 mg, 0.37 mmol) in 1 mL of toluene first 40 min  $100^\circ\text{C}$  then another 10 min for  $145^\circ\text{C}$  under microwave irradiation and  $\text{SiO}_2$  column chromatography (EtOAc : Hexane, 1 : 60) gave **4j**<sup>5</sup> as light yellow solid (41 mg, 38%).  $^1\text{H}$  NMR (600 MHz,  $\text{CDCl}_3$ )  $\delta = 7.76 - 7.75$  (m, 1H), 7.71 (d,  $J = 8.9$  Hz, 1H), 7.34 – 7.33 (m, 1H), 7.29 – 7.21 (m, 7H), 7.09 (d,  $J = 8.9$  Hz, 1H), 5.28 (s, 1H), 4.70 – 4.67 (m, 1H), 3.28 – 3.23 (m, 1H), 2.59 – 2.55 (m, 1H), 1.98 – 1.87 (m, 5H), 1.55 – 1.51 (m, 2H), 1.48 – 1.43 (m, 3H). HRMS (ESI) exact mass calculated for  $\text{C}_{24}\text{H}_{26}\text{NO}^+$  ( $[\text{M}+\text{H}]^+$ ) : 344.2009; Found : 344.2098

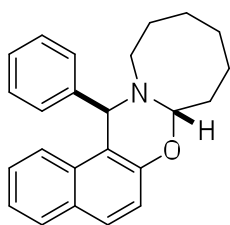

**2,4-di-tert-butyl-5a,6,7,8,9,11-hexahydrobenzo[e]pyrido[2,1-b][1,3]oxazine (4k):** According

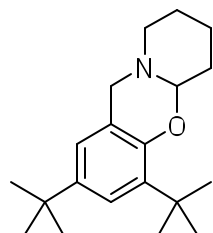

to GP II: Piperidine (35  $\mu$ L, 0.36 mmol), 3,5 di tert-butyl salicylaldehyde (0.10 g, 0.43 mmol) in 1.5 mL of toluene 30 min 145  $^{\circ}$ C under microwave irradiation and SiO<sub>2</sub> column chromatography (EtOAc : Hexane, 1:25) gave **4k** as yellowish oil (51 mg, 47%). FTIR (KBr):  $\tilde{\nu}$  = 2949, 2865, 1652, 1641, 1479, 1449, 1360, 1226, 1128, 1103, 1069, 879, 870, 758  $\text{cm}^{-1}$ . <sup>1</sup>H NMR (600 MHz, CDCl<sub>3</sub>)  $\delta$  = 7.15 (s, 1H), 6.81 (s, 1H), 4.85 – 4.83 (m, 1H), 4.30 (d,  $J$  = 16.1 Hz, 1H), 3.61 (d,  $J$  = 16.1 Hz, 1H), 2.94 – 2.90 (m, 1H), 2.54 – 2.51 (m, 1H), 2.01 – 1.98 (m, 1H), 1.87 – 1.83 (m, 1H), 1.78 – 1.70 (m, 3H), 1.61 – 1.57 (m, 1H), 1.40 (s, 9H), 1.29 (s, 9H). <sup>13</sup>C NMR (101 MHz, CDCl<sub>3</sub>)  $\delta$  = 150.3, 142.0, 136.4, 121.9, 121.7, 118.3, 86.3, 54.7, 48.2, 35.1, 34.4, 31.8, 30.7, 29.9, 25.5, 19.4. HRMS (ESI) exact mass calculated for C<sub>20</sub>H<sub>32</sub>NO<sup>+</sup> ([M+H]<sup>+</sup>): 302.2478; Found : 302.2478.

**10-methyl-8,9,10,12-tetrahydro-7aH-naphtho[1,2-e]pyrrolo[2,1-b][1,3]oxazine (4l):**

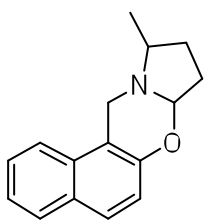

According to GP II: 2-Hydroxy naphthaldehyde (86 mg, 0.50 mmol), 1-methyl pyrrolidine (20  $\mu$ L, 0.19 mmol) in 1 mL of toluene 130  $^{\circ}$ C under microwave irradiation for 20 min and SiO<sub>2</sub> column chromatography (EtOAc : Hexane, 1 : 20) gave inseparable regioisomeric mixture (~5:1) of **4l** as brown solid (22 mg, 46%). FTIR (KBr):  $\tilde{\nu}$  = 2960, 2920, 2853, 1635, 1516, 1467, 1434, 1396, 1261, 1228, 1095, 1074, 1016, 860, 811, 746  $\text{cm}^{-1}$ . <sup>1</sup>H NMR (400 MHz, CDCl<sub>3</sub>)  $\delta$  = 7.76 (d,  $J$  = 8.0 Hz, 1H), 7.67 (d,  $J$  = 8.6 Hz, 1H), 7.63 (d,  $J$  = 8.8 Hz, 1H), 7.50 – 7.47 (m, 1H), 7.36 – 7.32 (m, 1H), 6.99 (d,  $J$  = 8.9 Hz, 1H), 5.26 – 5.25 (m, 1H), 4.58 (d,  $J$  = 17.4 Hz, 1H), 4.27 (d,  $J$  = 17.5 Hz, 1H), 3.15 – 3.10 (m, 1H), 2.29 – 2.03 (m, 4H), 1.23 (d,  $J$  = 6.0 Hz, 3H). HRMS (ESI) exact mass calculated for C<sub>16</sub>H<sub>18</sub>NO<sup>+</sup> ([M+H]<sup>+</sup>): 240.1383; Found: 240.1381

**7a-methyl-12-phenyl-8,9,10,12-tetrahydro-7aH-naphtho[1,2-e]pyrrolo[2,1-b][1,3]oxazine (4m):**

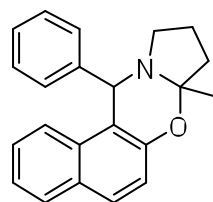

According to GP II: 2-methyl pyrrolidine (34  $\mu$ L, 0.33 mmol), (2-hydroxynaphthalen-1-yl)(phenyl)methanone (0.10 g, 0.40 mmol) in 1.5 mL of toluene 20 min 145  $^{\circ}$ C under microwave irradiation and SiO<sub>2</sub> column chromatography (EtOAc : Hexane, 1 : 30) gave inseparable regioisomeric mixture (~4:1) of **4m** as yellowish oil (85 mg, 82%). FTIR (KBr):  $\tilde{\nu}$  = 2935, 2850, 1623, 1599, 1514, 1462, 1380, 1241, 1109, 1065, 972, 811, 746, 702, 623  $\text{cm}^{-1}$ . <sup>1</sup>H NMR (400 MHz, CDCl<sub>3</sub>)

$\delta = 7.80 - 7.78$  (m, 1H),  $7.75$  (d,  $J = 8.9$  Hz, 1H),  $7.31 - 7.19$  (m, 8H),  $7.09$  (d,  $J = 8.9$  Hz, 1H),  $5.50$  (s, 1H),  $3.52 - 3.47$  (m, 1H),  $2.99$  (q,  $J = 8.7$  Hz, 1H),  $2.28 - 2.22$  (m, 1H),  $2.10 - 2.07$  (m, 1H),  $1.96 - 1.87$  (m, 2H),  $1.04$  (s, 3H). HRMS (ESI) exact mass calculated for  $C_{22}H_{22}NO^+$  ( $[M+H]^+$ ): 316.1696. Found: 316.1685

Table S2: Optimization of formal reductive amination

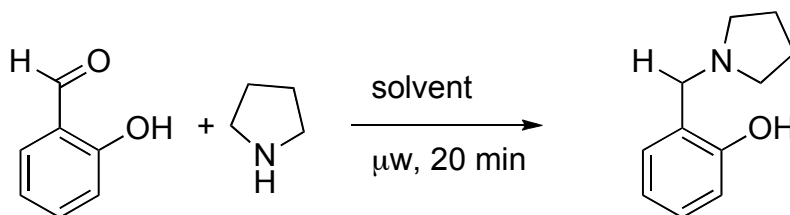

| entry | pyrrolidine | solvent         | temperature | Yield (%) |
|-------|-------------|-----------------|-------------|-----------|
| 1     | 1.0 eq      | Ethylene glycol | 150 °C      | 36        |
| 2     | 1.0 eq      | DMF             | 150 °C      | 41        |
| 3     | 2.0 eq      | DMF             | 150 °C      | 67        |
| 4     | 2.0 eq      | Ethylene glycol | 150 °C      | 63        |
| 5     | 1.0 eq      | no solvent      | 150 °C      | 30        |
| 6     | 2.0 eq      | no solvent      | 150 °C      | 50        |
| 7     | 2.2 eq      | m-xylene        | 170 °C      | 91        |

### General procedure for formal reductive amination: GP III

Aldehyde or ketone (0.82 mmol, 1.0 eq.), m-xylene (1.5 mL) and amine (1.8 mmol, 2.2 eq.) were added successively to an oven dried microwave reaction tube containing a stirring bar. Then the tube was sealed with cap and resulting solution was heated at 170 °C for 20 min under microwave irradiation (200 watt). Then the reaction mixture was cooled to room temperature. Reaction mixture was quenched with aqueous 1N  $NH_4Cl$  solution (15 mL) extracted with (3×20 mL) EtOAc. Then combined organic layers were washed with brine (30 mL) dried ( $Na_2SO_4$ ), concentrated in vacua. The crude product was purified by  $SiO_2$ -gel column chromatography.

**1-((pyrrolidin-1-yl)methyl)naphthalen-2-ol (5a)**: According to GP III: Pyrrolidine (0.12 mL, 1.45 mmol), 2-hydroxy-naphthaldehyde (0.10 g, 0.58 mmol) in 1.5 mL m-xylene, 170 °C under microwave irradiation for 20 min and  $SiO_2$ -column chromatography (EtOAc/Hexane, 1:2) gave **5a**<sup>4</sup> light brown liquid (97 mg, 74 %). <sup>1</sup>H NMR (400 MHz,  $CDCl_3$ )  $\delta = 10.65$  (s, 1H),  $7.72 - 7.66$  (m, 2H), 7.60

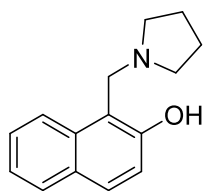

(d,  $J = 8$  Hz, 1H), 7.37 – 7.34 (m, 1H), 7.22 – 7.19 (m, 1H), 7.09 – 7.07 (m, 1H), 4.14 (s, 2H), 2.58 (br. s, 4H), 1.74 (br. s, 4H). HRMS (ESI) exact mass calculated for  $C_{15}H_{18}NO^+$  ( $[M+H]^+$ ) : 228.1383; Found : 228.1378

**2-Pyrrolidin-1-ylmethyl-phenol (5b):** According to GP III: Pyrrolidine (0.15 mL, 1.8 mmol), salicylaldehyde (86  $\mu$ L, 0.82 mmol) in 1.5 mL *m*-xylene, 170 °C under microwave irradiation for 20 min and  $SiO_2$ - column chromatography

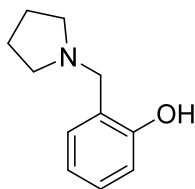

(EtOAc/Hexane, 1:7) gave **5b**<sup>5</sup> as a light brown liquid (0.13 g, 91 %). <sup>1</sup>H NMR (600 MHz,  $CDCl_3$ )  $\delta = 7.159$  (t,  $J = 7.8$  Hz, 1H), 6.96 (d,  $J = 7.20$  Hz, 1H), 6.81 (d,  $J = 7.8$  Hz, 1H), 6.75 (t,  $J = 7.2$  Hz, 1H), 3.81 (s, 2H), 2.62 (s, 4H), 1.84 (s, 4H). HRMS (ESI) exact mass calculated for  $C_{11}H_{16}NO^+$  ( $[M+H]^+$ ) : 178.1226; Found : 178.1232

**2,4-Di-tert-butyl-6-pyrrolidin-1-ylmethyl-phenol (5c):** According to GP III: Pyrrolidine (78  $\mu$ L, 0.95 mmol), 3,5-ditertiary butyl salicylaldehyde (0.10 g, 0.43 mmol) in 1.5 mL *m*-xylene, 170 °C under microwave irradiation for 20 min and  $SiO_2$ -column chromatography (EtOAc/Hexane, 1:30) gave **5c**<sup>6</sup> yellow solid product

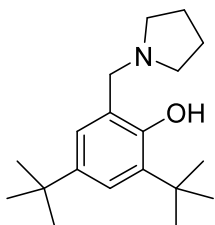

(92 mg, 74 %). <sup>1</sup>H NMR (600 MHz,  $CDCl_3$ )  $\delta = 7.21$  (d,  $J = 2.4$  Hz, 1H), 6.84 (d,  $J = 2.4$  Hz, 1H), 3.80 (s, 2H), 2.63 (s, 4H), 1.85 – 1.84 (m, 4H), 1.43 (s, 9H), 1.29 (s, 9H). HRMS (ESI) exact mass calculated for  $C_{19}H_{32}NO^+$  ( $[M+H]^+$ ) : 290.2478; Found : 290.2486

**2-[(Ethyl-methyl-amino)-methyl]-6-methoxy-phenol (5d):** According to GP III: Pyrrolidine (0.12 mL, 1.45 mmol), *ortho*-vanillin (0.10 g, 0.66 mmol) in 1.5 mL *m*-xylene, 170 °C under microwave irradiation for 20 min and  $SiO_2$ -column chromatography

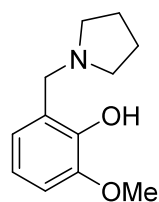

(EtOAc/Hexane, 1:1) gave **5d** yellow liquid product (83 mg, 61 %). FTIR (KBr):  $\tilde{\nu} = 3451, 2933, 2833, 1639, 1478, 1414, 1240, 1075, 733, 709$   $cm^{-1}$ . <sup>1</sup>H NMR (600 MHz,  $CDCl_3$ )  $\delta = 6.80$  (d,  $J = 7.8$  Hz, 1H), 6.71 (t,  $J = 7.8$  Hz, 1H), 6.60 (d,  $J = 7.2$  Hz, 1H), 3.87 (s, 3H), 3.84 (s, 2H), 2.64 (br. s, 4H), 1.84-1.83 (m, 4H). <sup>13</sup>C NMR (100 MHz,  $CDCl_3$ ),  $\delta = 148.07, 147.59, 122.78, 120.24, 118.60, 111.03, 58.63, 56.08, 53.63, 23.83$ . HRMS (ESI) exact mass calculated for  $C_{12}H_{18}NO_2^+$  ( $[M+H]^+$ ): 208.1332, found: 208.1332.

**1-Piperidin-1-ylmethyl-naphthalen-2-ol (5e):** According to GP III: Piperidine (0.13 mL, 1.28

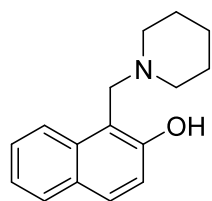

mmol), 2-hydroxy-naphthaldehyde (0.10 g, 0.58 mmol) in 1.5 mL *m*-xylene, 170 °C under microwave irradiation for 20 min and SiO<sub>2</sub>-column chromatography (EtOAc/Hexane, 1:5) gave **5e**<sup>7</sup> light brown liquid product (83 mg, 60 %). <sup>1</sup>H NMR (400 MHz, CDCl<sub>3</sub>) δ = 7.79 (d, *J* = 8.8 Hz, 1H), 7.73 (d, *J* = 8.0 Hz, 1H), 7.66 (d, *J* = 8.4 Hz, 1H), 7.43-7.39 (m, 1H), 7.28-7.24 (m, 1H), 7.07 (d, *J* = 8.8 Hz, 1H), 4.10 (s, 2H), 3.45-1.51 (m, 10H). HRMS (ESI) exact mass calculated for C<sub>16</sub>H<sub>20</sub>NO<sup>+</sup> ([M+H]<sup>+</sup>): 242.1539; Found: 242.1544

**2-Piperidin-1-ylmethyl-phenol (5f):** According to GP III: Piperidine (0.18 mL, 1.82 mmol),

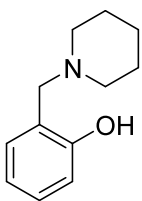

salicylaldehyde (87 μL, 0.82 mmol) in 1.5 mL *m*-xylene, 170 °C under microwave irradiation for 20 min and SiO<sub>2</sub>-column chromatography (EtOAc/Hexane, 1:15) gave **5f**<sup>8</sup> light brown liquid product (0.13 g, 80 %). <sup>1</sup>H NMR (400 MHz, CDCl<sub>3</sub>) δ = 7.17 – 7.13 (m, 1H), 6.96 – 6.94 (m, 1H), 6.81 (dd, *J*<sub>1</sub> = 8.4 Hz, *J*<sub>2</sub> = 0.8 Hz, 1H), 6.77 (td, *J*<sub>1</sub> = 7.2 Hz, *J*<sub>2</sub> = 0.8 Hz, 1H), 3.66 (s, 2H), 2.70-2.20 (m, 3H), 1.65-1.61 (m, 5H), 1.48-1.41 (m, 2H). HRMS (ESI) exact mass calculated for C<sub>12</sub>H<sub>18</sub>NO<sup>+</sup> ([M+H]<sup>+</sup>): 192.1383; Found: 192.1397

**2,4-Di-tert-butyl-6-piperidin-1-ylmethyl-phenol (5g):** According to GP III: Piperidine (93

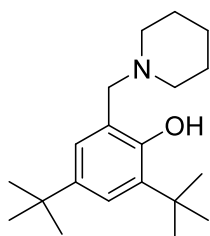

μL, 0.95 mmol), 3,5-ditertiary butyl salicylaldehyde (0.10 g, 0.43 mmol) in 1.5 mL *m*-xylene, 170 °C under microwave irradiation for 20 min and SiO<sub>2</sub>-column chromatography (EtOAc/Hexane, 1:30) gave **5g**<sup>9</sup> yellow solid product (89 mg, 67 %). <sup>1</sup>H NMR (400 MHz, CDCl<sub>3</sub>) δ = 7.20 (d, *J* = 2.0 Hz, 1H), 6.81 (d, *J* = 2.4 Hz, 1H), 3.63 (s, 2H), 2.98-1.43 (m, 10H), 1.42 (s, 9H), 1.27 (s, 9H). HRMS (ESI) exact mass calculated for C<sub>20</sub>H<sub>34</sub>NO<sup>+</sup> ([M+H]<sup>+</sup>): 304.2635; Found: 304.2690

**2-Azepan-1-ylmethyl-phenol (5h):** According to GP III: Hexamethyleneimine (0.20 mL, 1.8

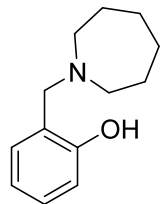

mmol), salicylaldehyde (86 μL, 0.82 mmol) in 1.5 mL *m*-xylene, 170 °C under microwave irradiation for 20 min and SiO<sub>2</sub>-column chromatography (EtOAc/Hexane, 1:20) gave **5h** light brown liquid product (0.12 g, 72 %). FTIR (KBr):  $\tilde{\nu}$  = 3472, 2926, 2848, 1635, 1479, 1258, 1145, 1045, 1033, 753 cm<sup>-1</sup>. <sup>1</sup>H NMR (600 MHz, CDCl<sub>3</sub>) δ = 7.17-7.14 (m, 1H), 6.94 (d, *J* = 7.8 Hz, 1H), 6.81 (d, *J* = 7.8 Hz, 1H), 6.77-6.74 (m, 1H), 3.78 (s, 2H), 2.70 (s, 4H), 1.69 (d, *J* = 4.8 Hz, 4H), 1.64-1.63 (m, 4H).

$^{13}\text{C}$  NMR (100 MHz,  $\text{CDCl}_3$ ),  $\delta = 158.6, 128.8, 128.5, 122.4, 118.97, 116.2, 62.2, 55.4, 27.8, 26.8$ . HRMS (ESI) exact mass calculated for  $\text{C}_{13}\text{H}_{20}\text{NO}^+$  ( $[\text{M}+\text{H}]^+$ ): 206.1539, found: 206.1538.

**1-(Phenyl-pyrrolidin-1-yl-methyl)-naphthalen-2-ol (5i):** According to GP III: Pyrrolidine (72

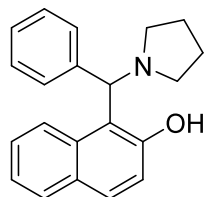

$\mu\text{L}$ , 0.88 mmol), (2-Hydroxynaphthalen-1-yl)-phenyl-methanone (0.10 g, 0.40 mmol) in 1.5 mL *m*-xylene, 170 °C under microwave irradiation for 20 min and  $\text{SiO}_2$ -column chromatography (EtOAc/Hexane 1:20) gave **5i**<sup>5</sup> colourless solid product (75 mg, 62 %).  $^1\text{H}$  NMR (400 MHz,  $\text{CDCl}_3$ )  $\delta = 7.87$  (d,  $J = 8.4$  Hz, 1H), 7.69 (d,  $J = 8.0$  Hz, 1H), 7.65 (d,  $J = 9.2$  Hz, 1H), 7.61 – 7.59 (m, 2H),

7.38-7.34 (m, 1H), 7.27-7.14 (m, 5H), 5.12 (s, 1H), 3.25-2.04 (m, 4H), 1.85 (s, 4H). HRMS (ESI) exact mass calculated for  $\text{C}_{21}\text{H}_{22}\text{NO}^+$  ( $[\text{M}+\text{H}]^+$ ) : 304.1696; Found : 304.1696

**1-[(4-Methoxy-phenyl)-pyrrolidin-1-yl-methyl]-naphthalen-2-ol (5j):** According to GP III:

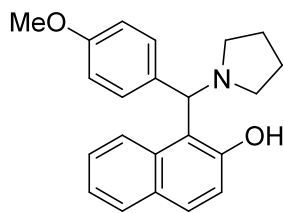

Pyrrolidine (64  $\mu\text{L}$ , 0.79 mmol), (2-Hydroxy-naphthalen-1-yl)-(4-methoxy-phenyl)-methanone (0.10 g, 0.36 mmol) in 1.5 mL *m*-xylene, 170 °C under microwave irradiation for 20 min and  $\text{SiO}_2$ -column chromatography (EtOAc/Hexane, 1:7) gave **5j**<sup>5</sup> light brown liquid (73 mg, 61 %).  $^1\text{H}$  NMR (400 MHz,  $\text{CDCl}_3$ )  $\delta = 7.84$  (d,  $J = 8.4$  Hz, 1H),

7.70-7.64 (m, 2H), 7.51- 7.49 (m, 2H), 7.38-7.34 (m, 1H), 7.24-7.13 (m, 2H), 6.78 (d,  $J = 7.2$  Hz, 2H), 5.08 (s, 1H), 3.71 (s, 3H), 3.25-2.04 (m, 4H), 1.84 (br. s, 4H). HRMS (ESI) exact mass calculated for  $\text{C}_{22}\text{H}_{24}\text{NO}_2^+$  ( $[\text{M}+\text{H}]^+$ ) : 334.1802; Found : 334.1808

**2-(2-Methylene-1-pyrrolidin-1-yl-pent-3-enyl)-phenol (5k):** According to GPIII: Pyrrolidine

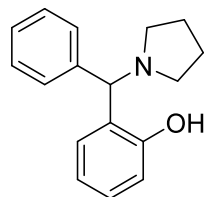

(92  $\mu\text{L}$ , 1.12 mmol), 2- HydroxyBenzophenone (0.10 g, 0.51 mmol) in 1.5 mL *m*-xylene, 170 °C under microwave irradiation for 20 min and  $\text{SiO}_2$ -column chromatography (EtOAc/Hexane, 1:30) gave **5k**<sup>10</sup> light brown liquid (0.10 g, 80 %).  $^1\text{H}$  NMR (400 MHz,  $\text{CDCl}_3$ )  $\delta = 7.47 - 7.45$  (m, 2H), 7.29 - 7.27 (m,

2H), 7.23-7.20 (m, 1H), 7.11-7.07 (m, 1H), 6.95 (d,  $J = 7.2$  Hz, 1H), 6.84 (d,  $J = 8.0$  Hz, 1H), 6.70 (t,  $J = 7.6$  Hz, 1H), 4.37 (s, 1H), 2.63-2.49 (m, 4H), 1.87 – 1.83 (m, 4H). HRMS (ESI) exact mass calculated for  $\text{C}_{17}\text{H}_{20}\text{NO}^+$  ( $[\text{M}+\text{H}]^+$ ) : 254.1539; Found : 254.1540

**rac-(7aS,12R)-12-(3-nitrophenyl)-8,9,10,12-tetrahydro-7aH-naphtho[1,2-e]pyrrolo[2,1-**

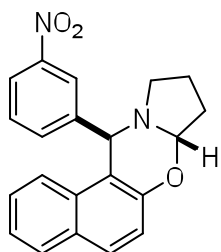

**b][1,3]oxazine (15):** According to GPII: 1-((3-nitrophenyl)(pyrrolidin-1-yl)methyl)naphthalen-2-ol (0.21 g, 0.60 mmol) (2-hydroxynaphthalen-1-yl)(phenyl)methanone (75 mg, 0.30 mmol) in 2 mL toluene 145 °C under microwave irradiation for 20 min and SiO<sub>2</sub> column chromatography (EtOAc : Hexane, 1 : 40) gave **2b** (19 mg, 21%) Compound **15**<sup>5</sup> was obtained after preparative TLC. (10 mg, 9 %). <sup>1</sup>H NMR (400 MHz, CDCl<sub>3</sub>) δ = 8.25 (s, 1H), 8.10 – 8.08 (m, 1H), 7.80 – 7.75 (m, 2H), 7.46 – 7.37 (m, 2H), 7.30 – 7.28 (m, 3H), 7.12 – 7.06 (m, 1H), 5.51 (s, 1H), 4.96 – 4.94 (m, 1H), 3.40 – 3.36 (m 1H), 2.96 – 2.92 (m, 1H), 2.15 – 2.03 (m, 4H). HRMS (ESI) exact mass calculated for C<sub>21</sub>H<sub>19</sub>N<sub>2</sub>O<sub>3</sub><sup>+</sup> ([M+H]<sup>+</sup>) : 347.1390; Found : 347.1395

**2-[(2,2,5,5-<sup>2</sup>H<sub>4</sub>)pyrrolidin-1-ylmethyl]phenol (18) and 2-[(2,2,5,5-<sup>2</sup>H<sub>4</sub>)pyrrolidin-1-**

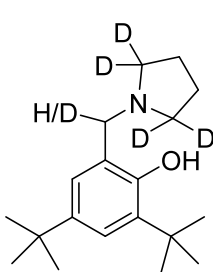

**yl(<sup>2</sup>H<sub>1</sub>)methyl]phenol (19):** According to GP III: Deuterated Pyrrolidine (0.02 mL, 0.22 mmol), 3,5 ditertiary butyl salicylaldehyde (23 mg, 0.10 mmol) in 0.34 mL m-xylene 170 °C under microwave irradiation for 20 min and SiO<sub>2</sub>-column chromatography (EtOAc/Hexane 1:50 to 1:30) gave inseparable 1:1 mixture of **18** & **19** as yellowish solid (15 mg, 50 %). FTIR (KBr):  $\tilde{\nu}$  = 3450, 2955, 2924, 2862, 2204, 2078, 1639, 1567, 1558, 1479, 1433, 1360, 1248, 1235, 1203, 1123, 1002, 878, 819, 792, 647, 647, 524 cm<sup>-1</sup>. <sup>1</sup>H NMR (600 MHz, CDCl<sub>3</sub>) δ = 7.2 (d, *J* = 2.4 Hz, 1H), 6.82 (d, *J* = 1.8 Hz, 1H), 3.79 (s, 1H), 3.76 (s, 0.5 H), 1.82 (s, 4H), 1.42 (s, 9H), 1.28 (s, 9H). <sup>13</sup>C NMR (150 MHz, CDCl<sub>3</sub>), δ = 154.72, 140.36, 135.48, 122.87, 122.81, 122.02, 59.84, 35.06, 34.35, 31.94, 29.84, 23.76. HRMS (ESI) exact mass calculated for (**18**) C<sub>19</sub>H<sub>28</sub>D<sub>4</sub>NO ([M+H]<sup>+</sup>): 294.2729; found: 294.2733. HRMS (ESI) exact mass calculated for (**19**) C<sub>19</sub>H<sub>27</sub>D<sub>5</sub>NO ([M+H]<sup>+</sup>): 295.2792; found: 295.2796.

## References

- <sup>1</sup> A. Kumar, P. Ahmad, R. A. Maurya, A.B. Singh, A. K. Srivastava, *Eur. J. Med. Chem.* 2009, **44**, 109.
- <sup>2</sup> A. S. Negi, I. Dwivedi, B.S. Setty, S. Ray, *Indian J. Pharm. Sci.* 1994, **56**, 105.
- <sup>3</sup> V. P. Malik, G. S. Saharia, *J. Sci & Ind. Res.*, 1956, **15B**, 633.
- <sup>4</sup> M. L. Deb, S. S. Dey, I. Bento, M. T. Barros, C. D. Maycock, *Angew. Chem. Int. Ed.* 2013, **52**, 9791 – 9795.
- <sup>5</sup> S. Mahato, S. Haldar, C. K. Jana, *Chem. Commun.* 2014, **50**, 332—334.
- <sup>6</sup> T. Maki, Y. Araki, Y. Ishida, O. Onomura, Y. Matsumura, *J. Am. Chem. Soc.* 2001, **123**, 3371.

- 
- <sup>7</sup> P.-J. J. Huang, T. S. Cameron, A. Jha, *Tetrahedron Lett.* 2009, **50**, 51–54.
- <sup>8</sup> E. Modica, R. Zanaletti, M. Freccero, M. Mella, *J. Org. Chem.* 2001, **66**, 41-52.
- <sup>9</sup> M. M. Hänninen, R. Sillanpää, H. Kivelä, A. Lehtonen, *Dalton Trans.*, 2011, **40**, 2868.
- <sup>10</sup> N. R. Candeias, P. M. P. Gois, C. A. M. Afonso, L.F.C. Veiros, *Eur. J. Org. Chem.* 2009, 1859-1863.



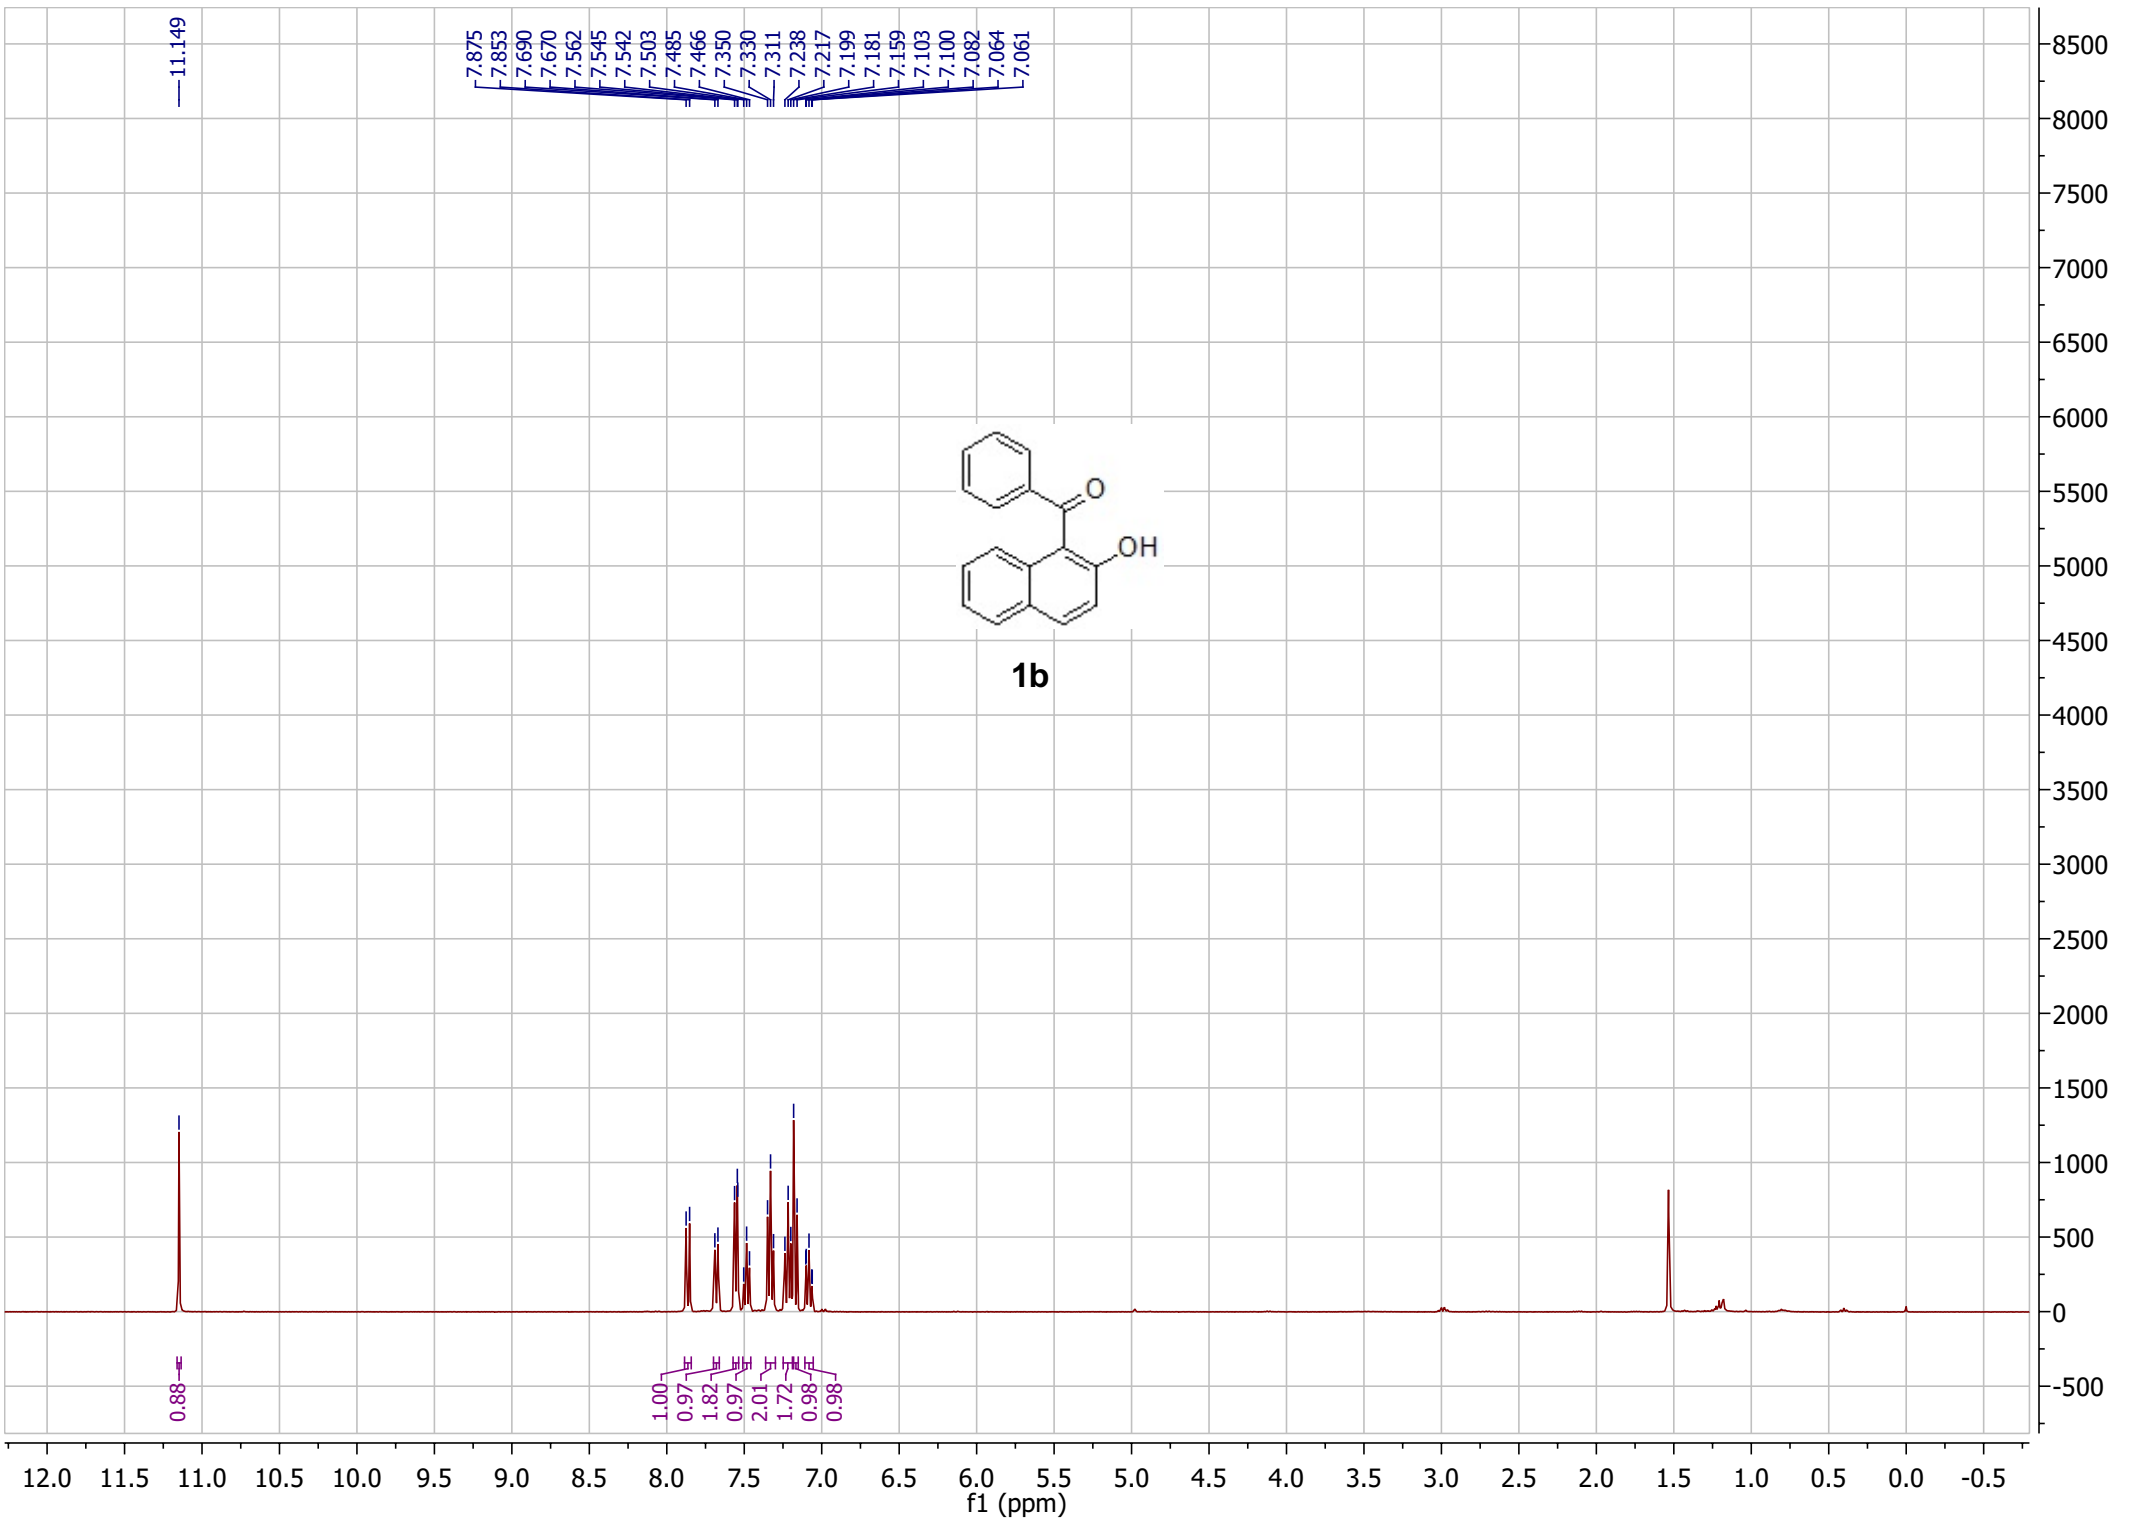

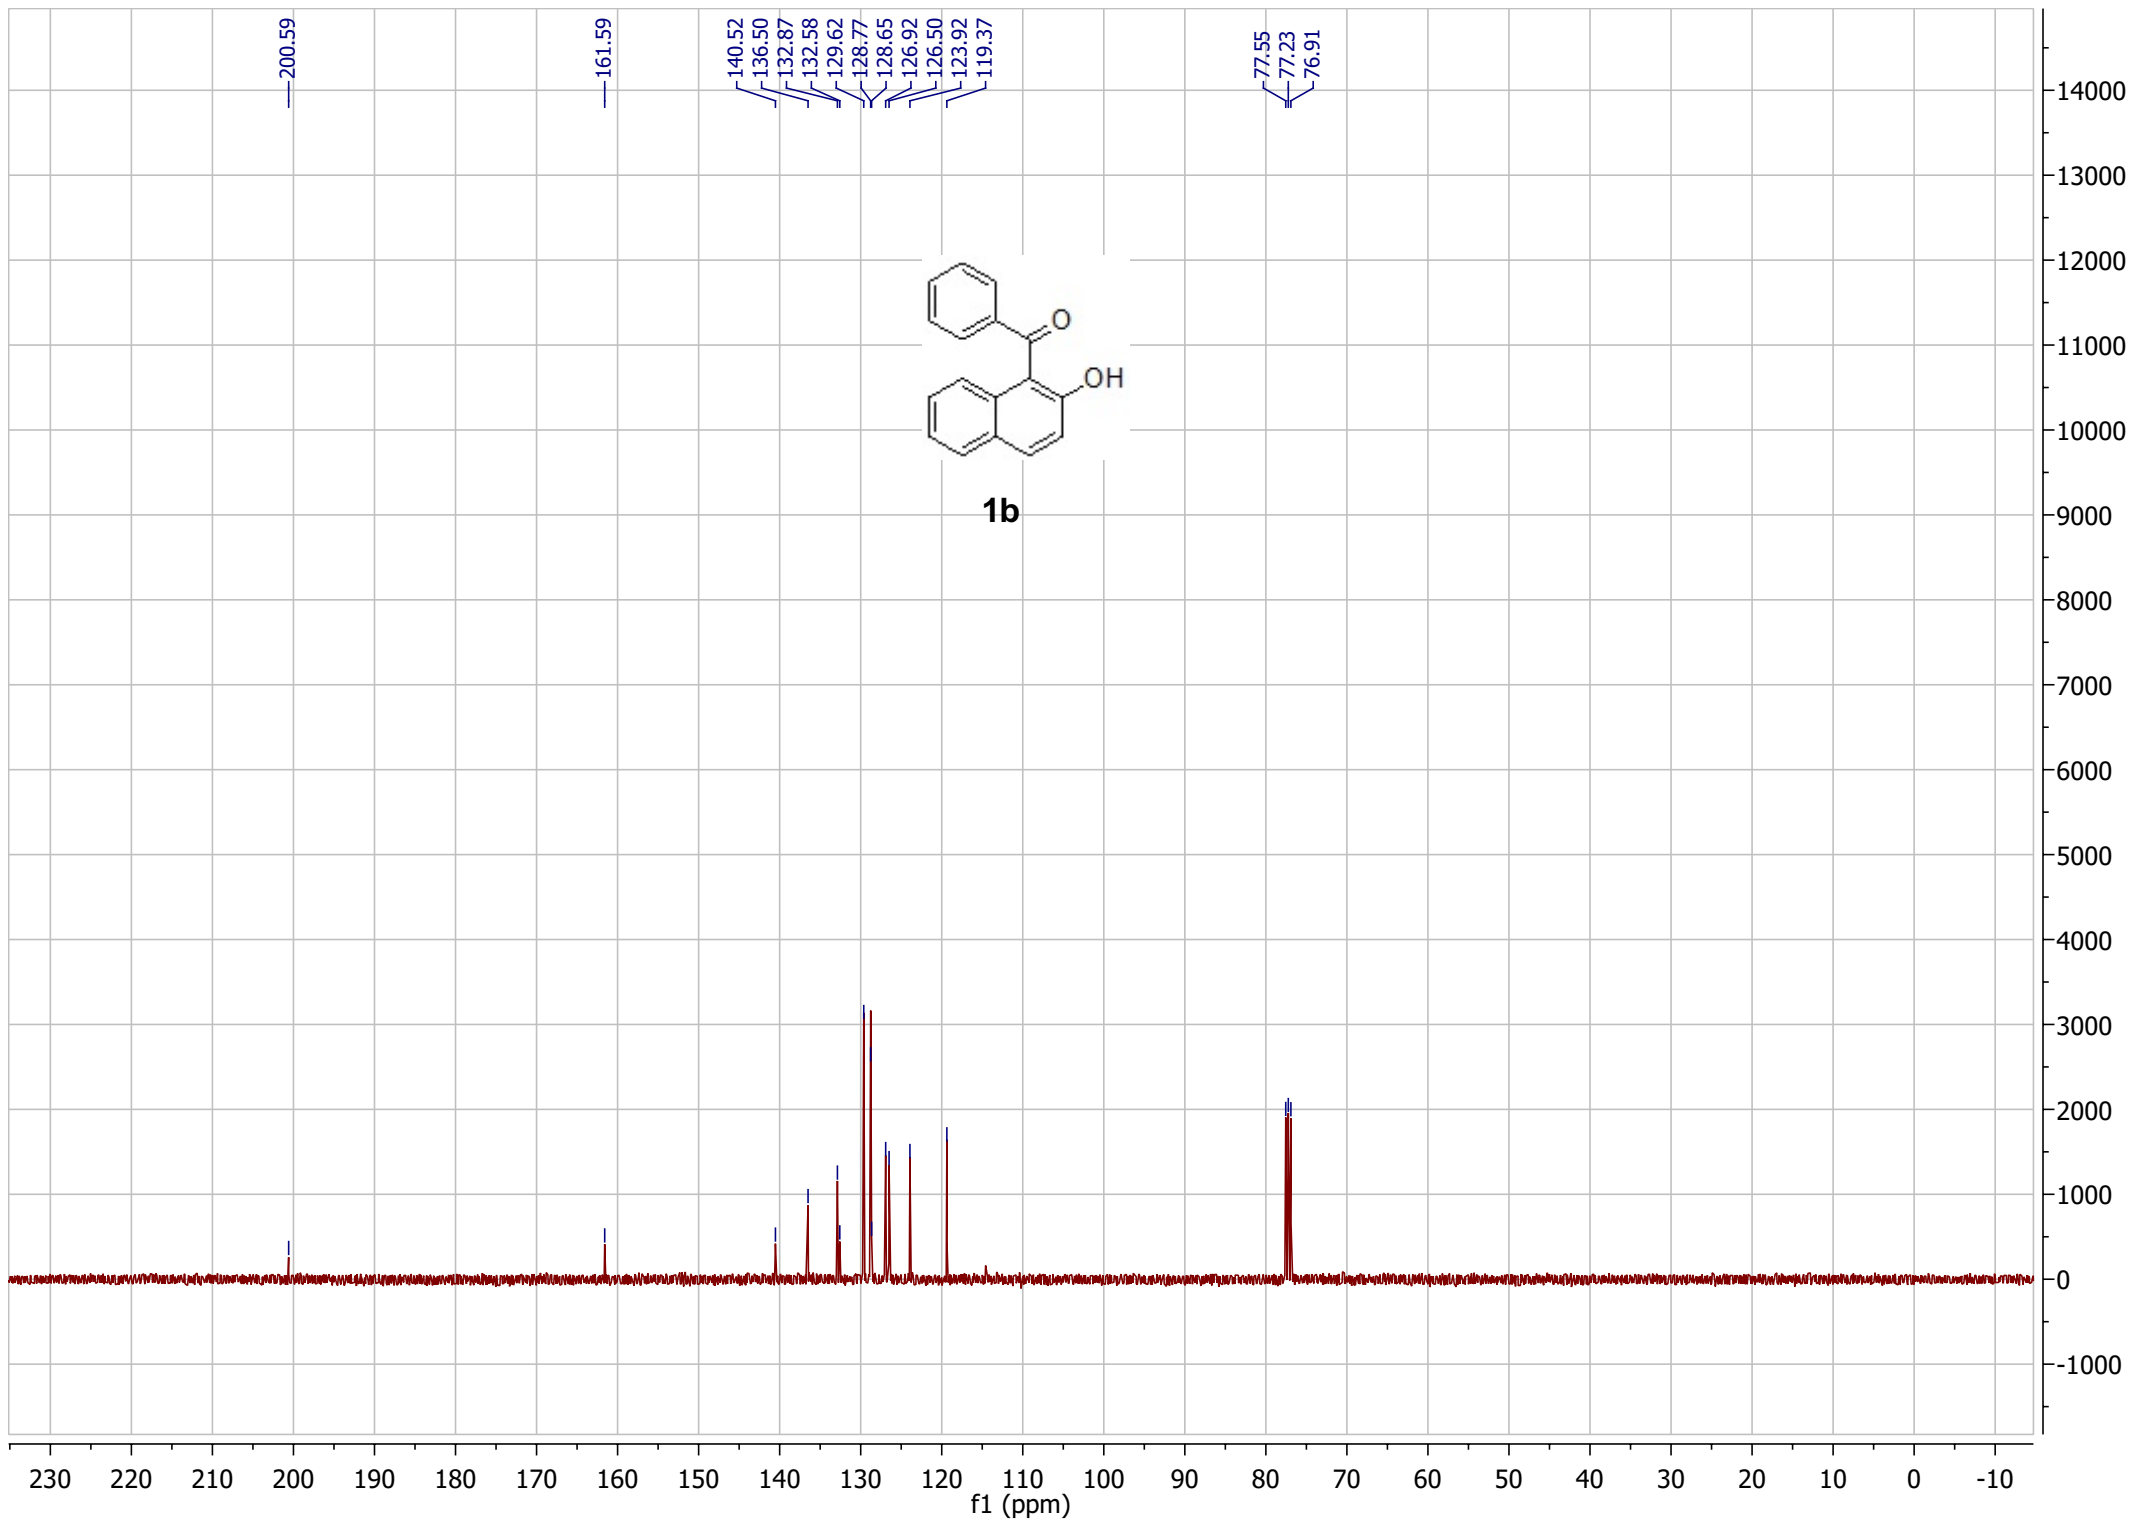

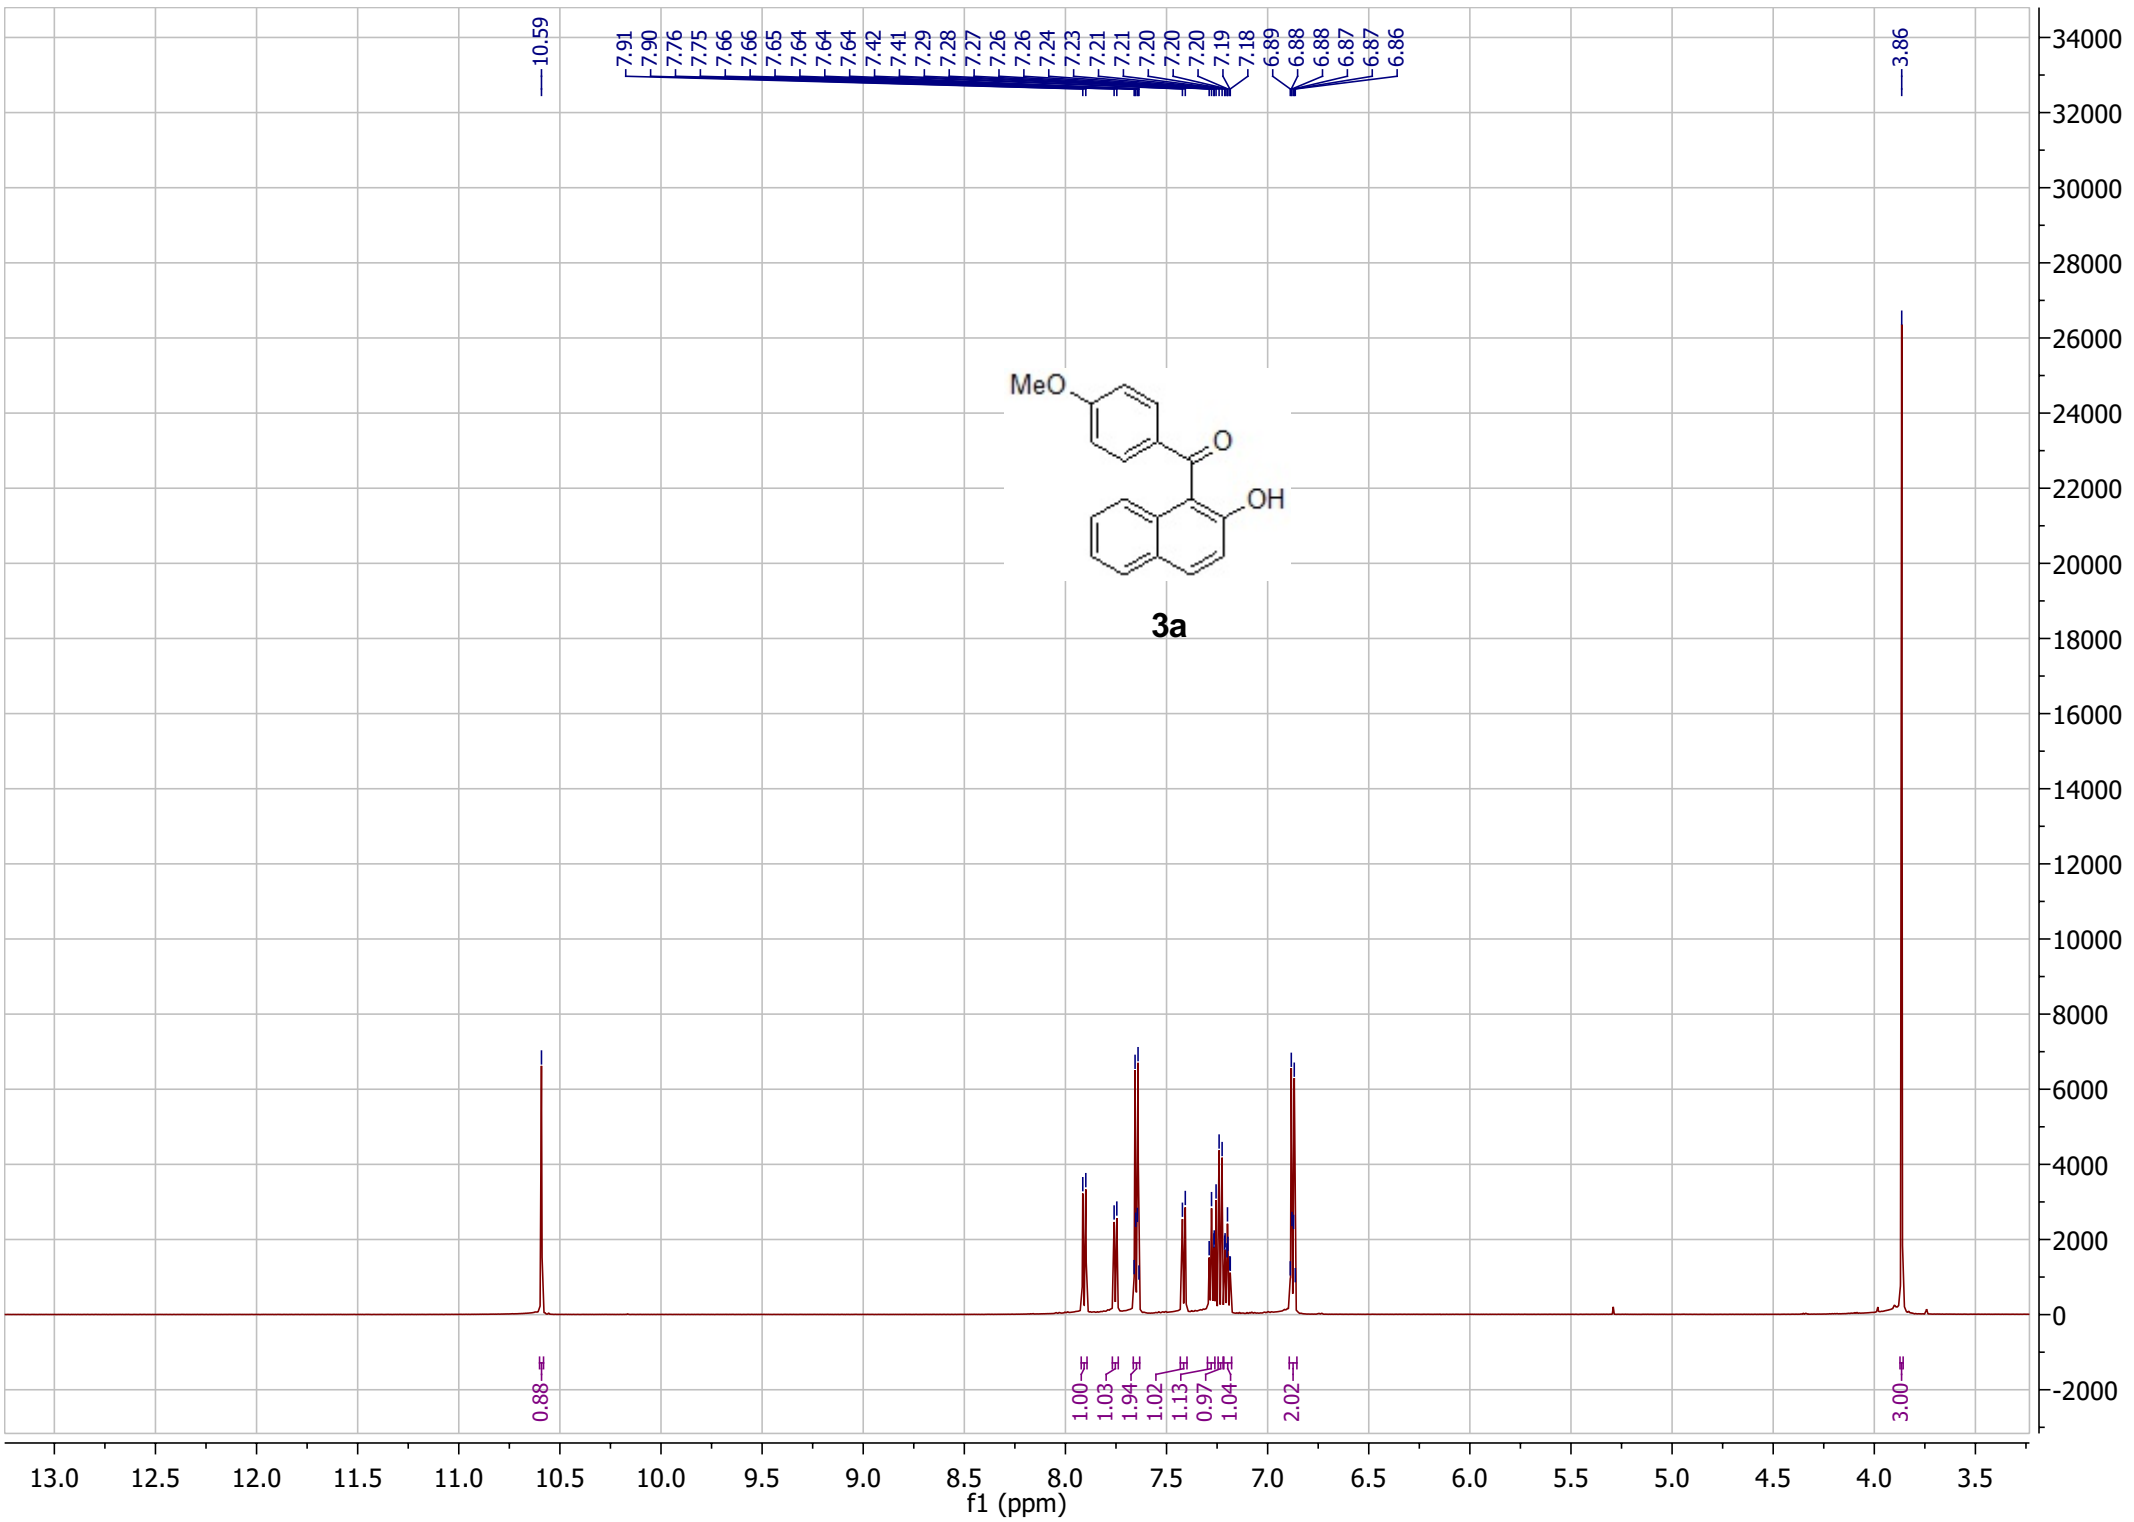

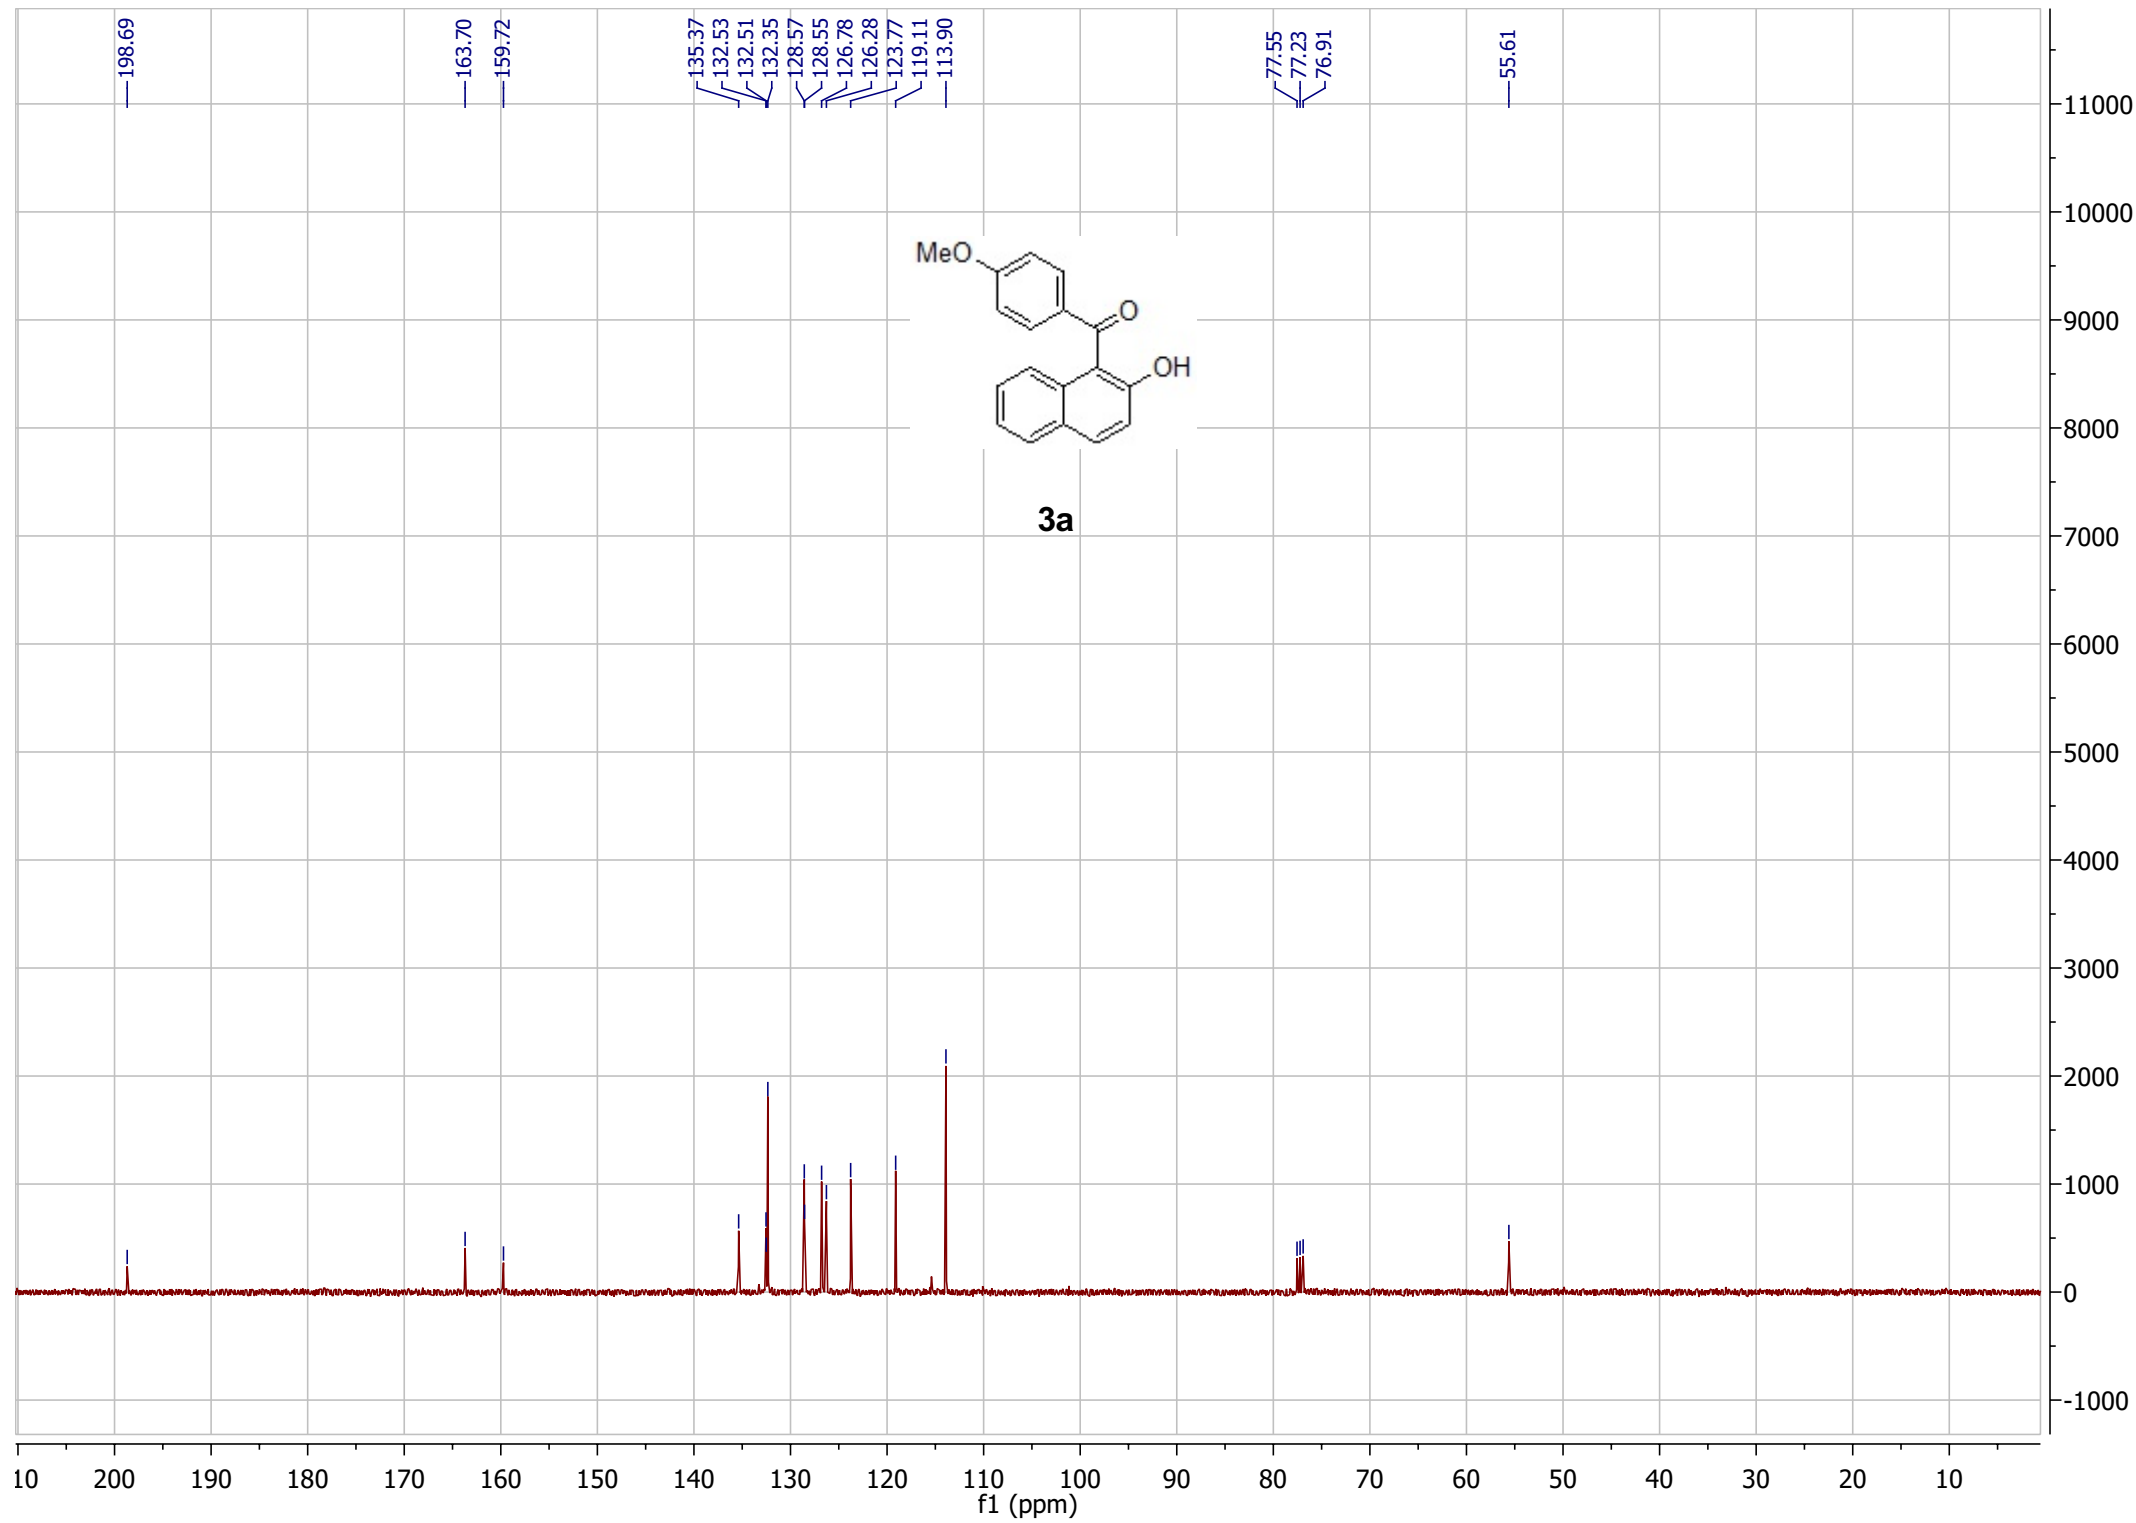

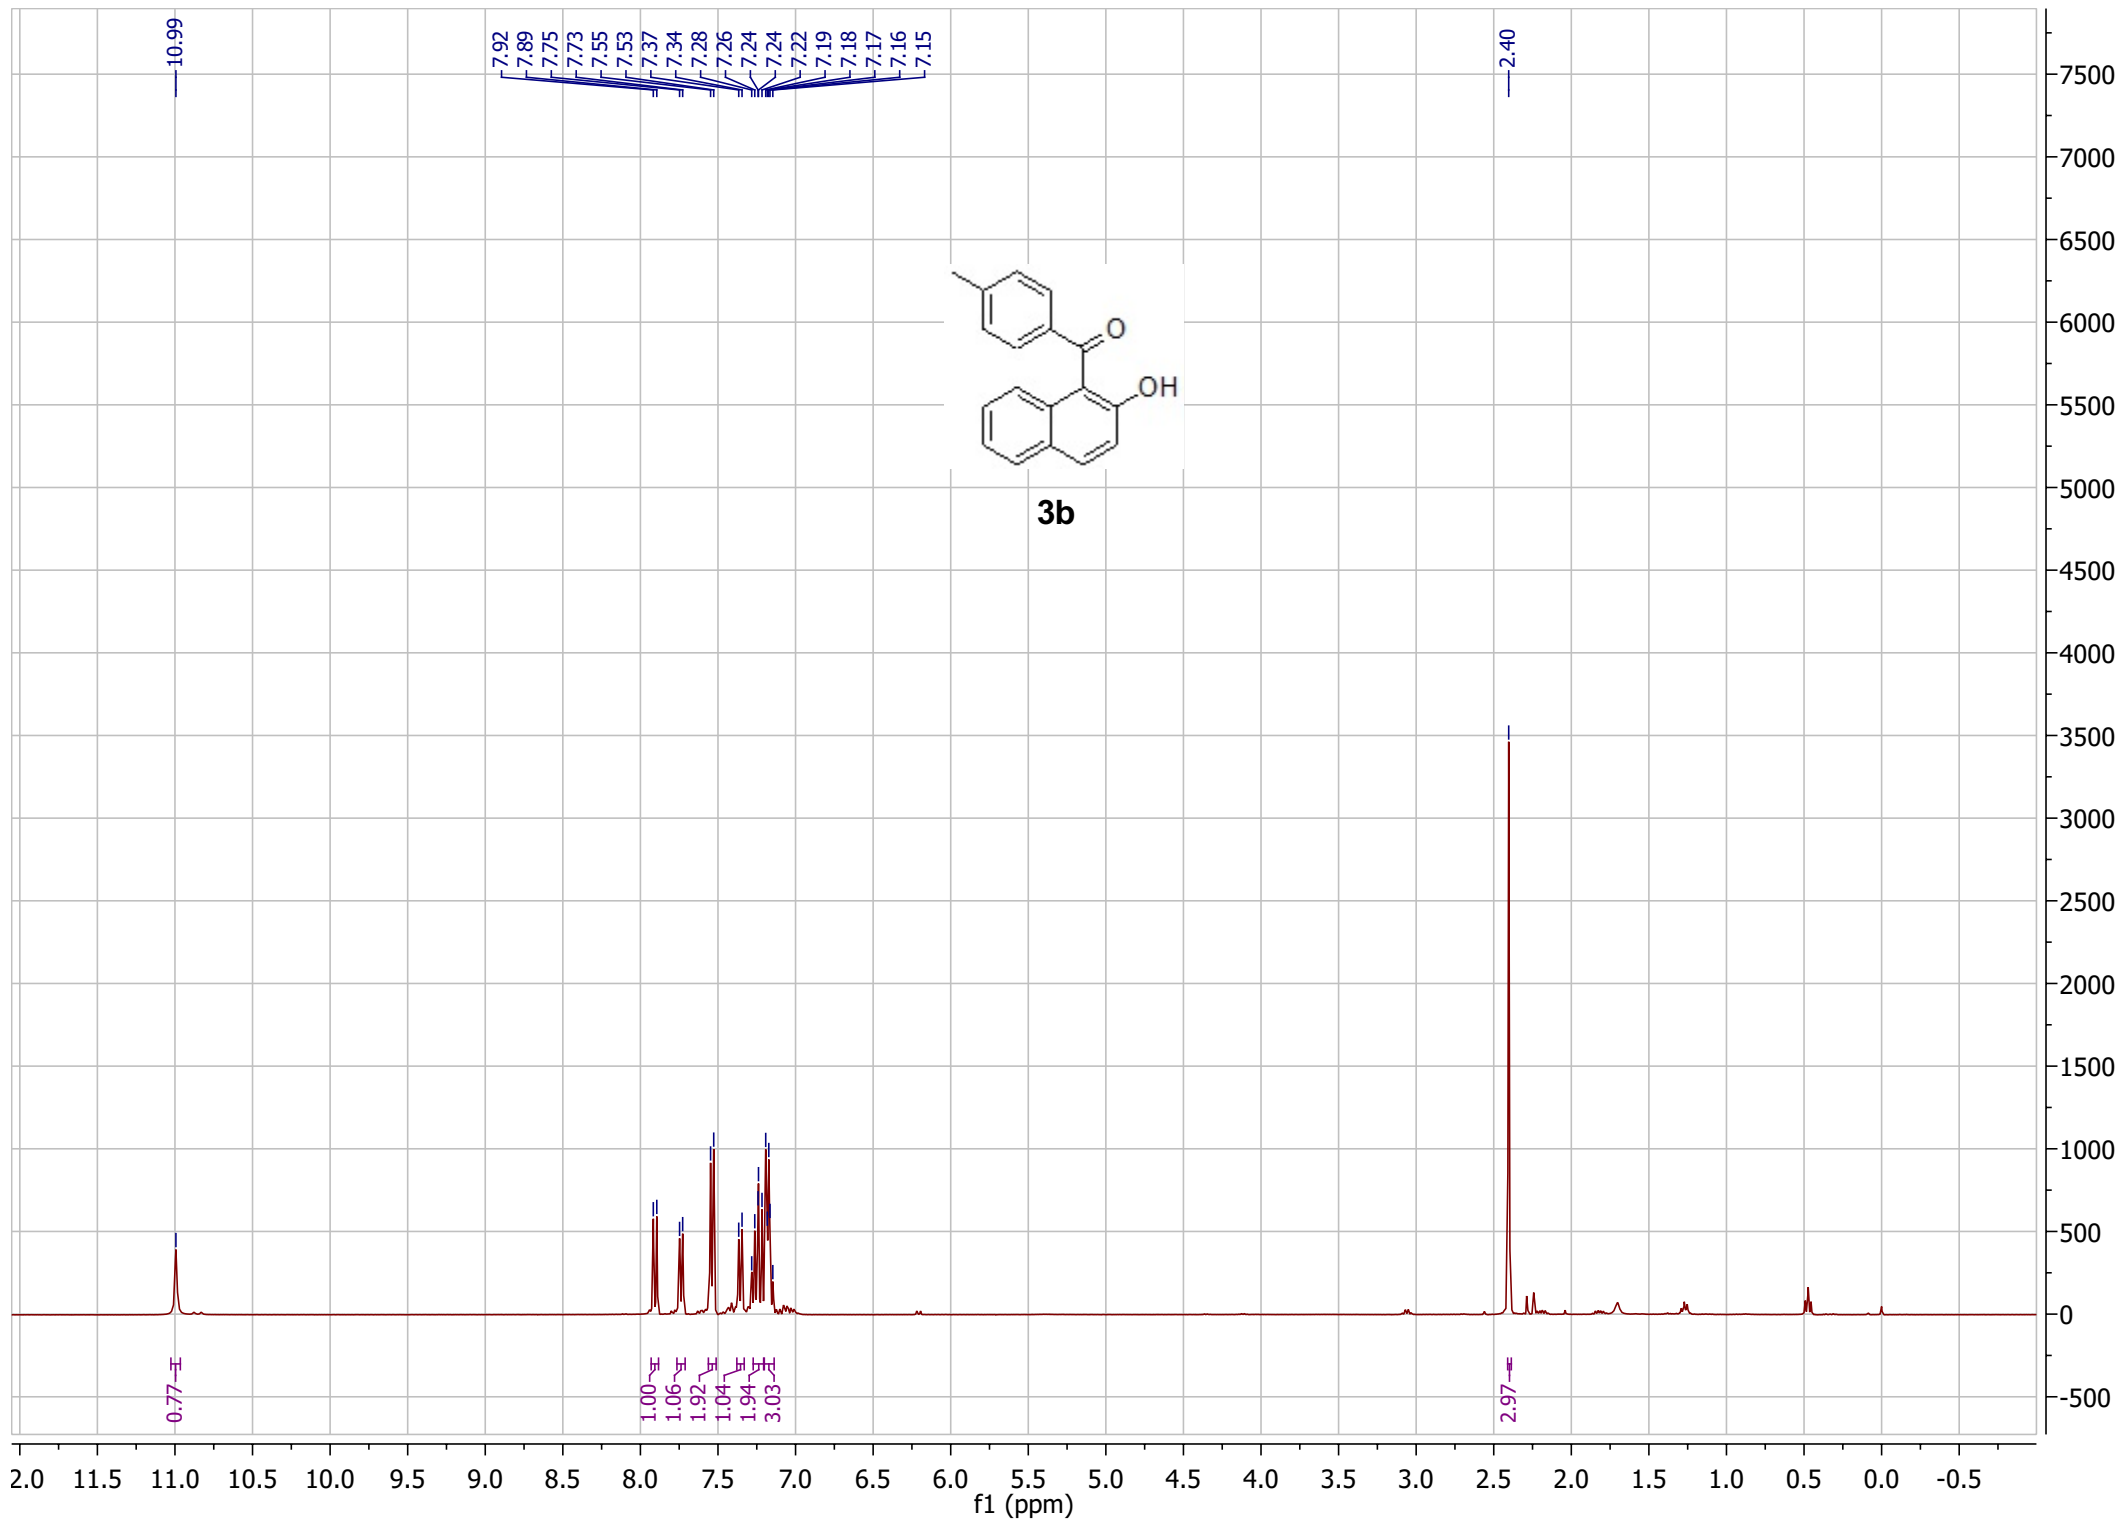

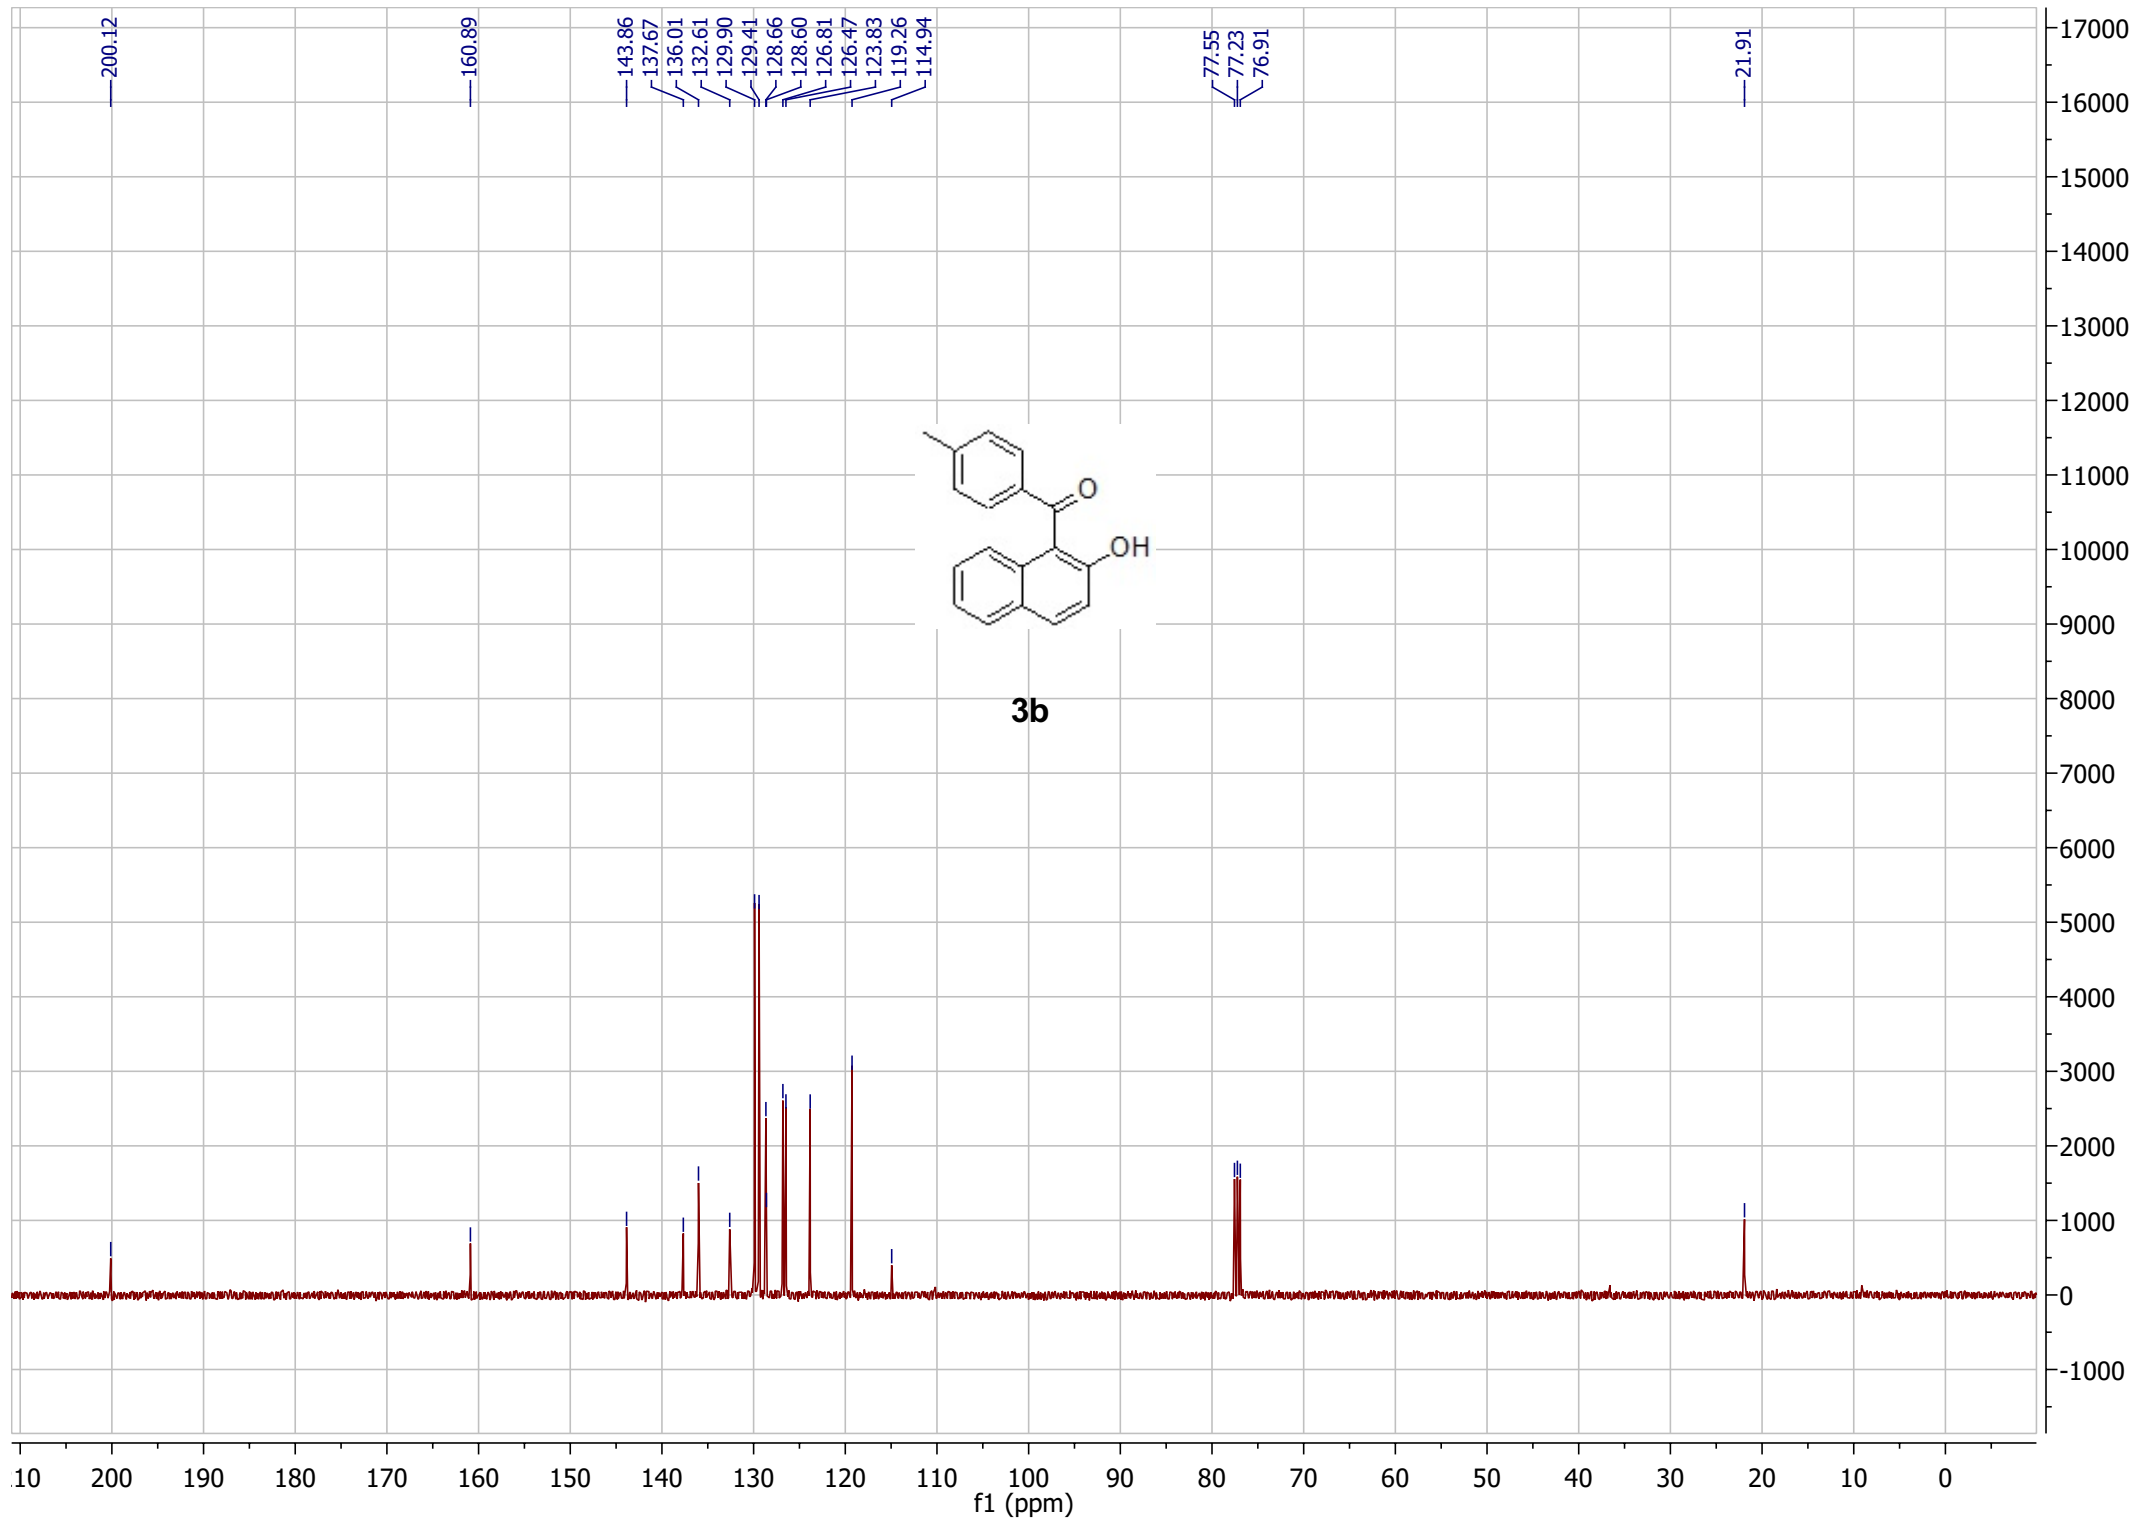

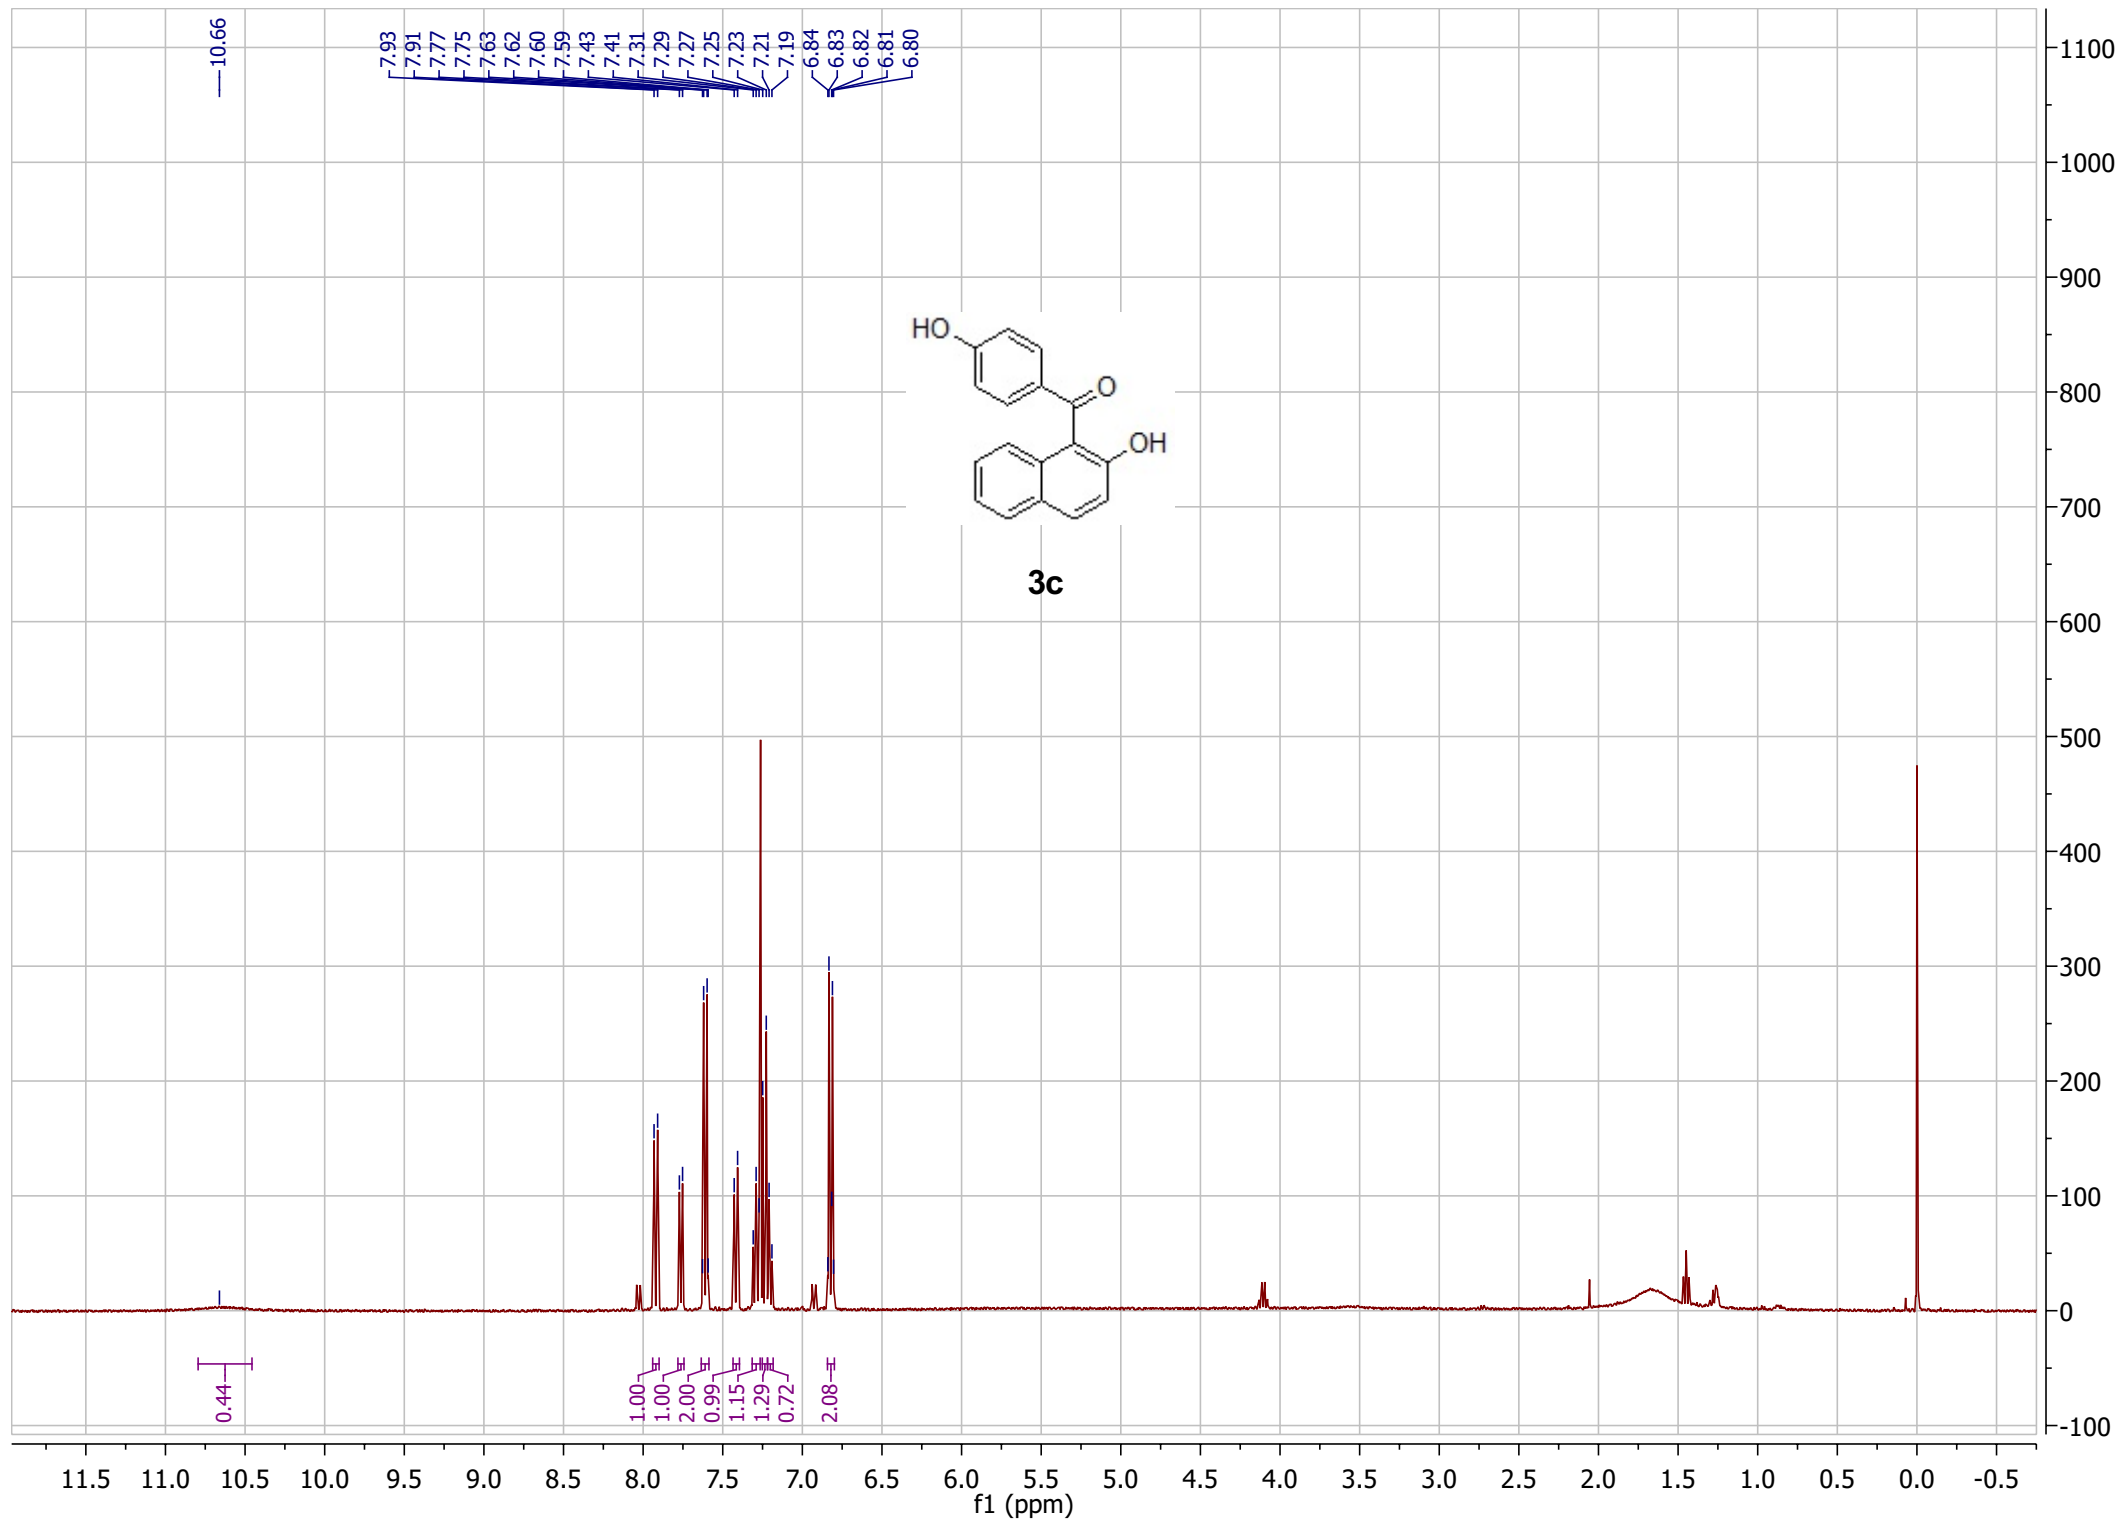

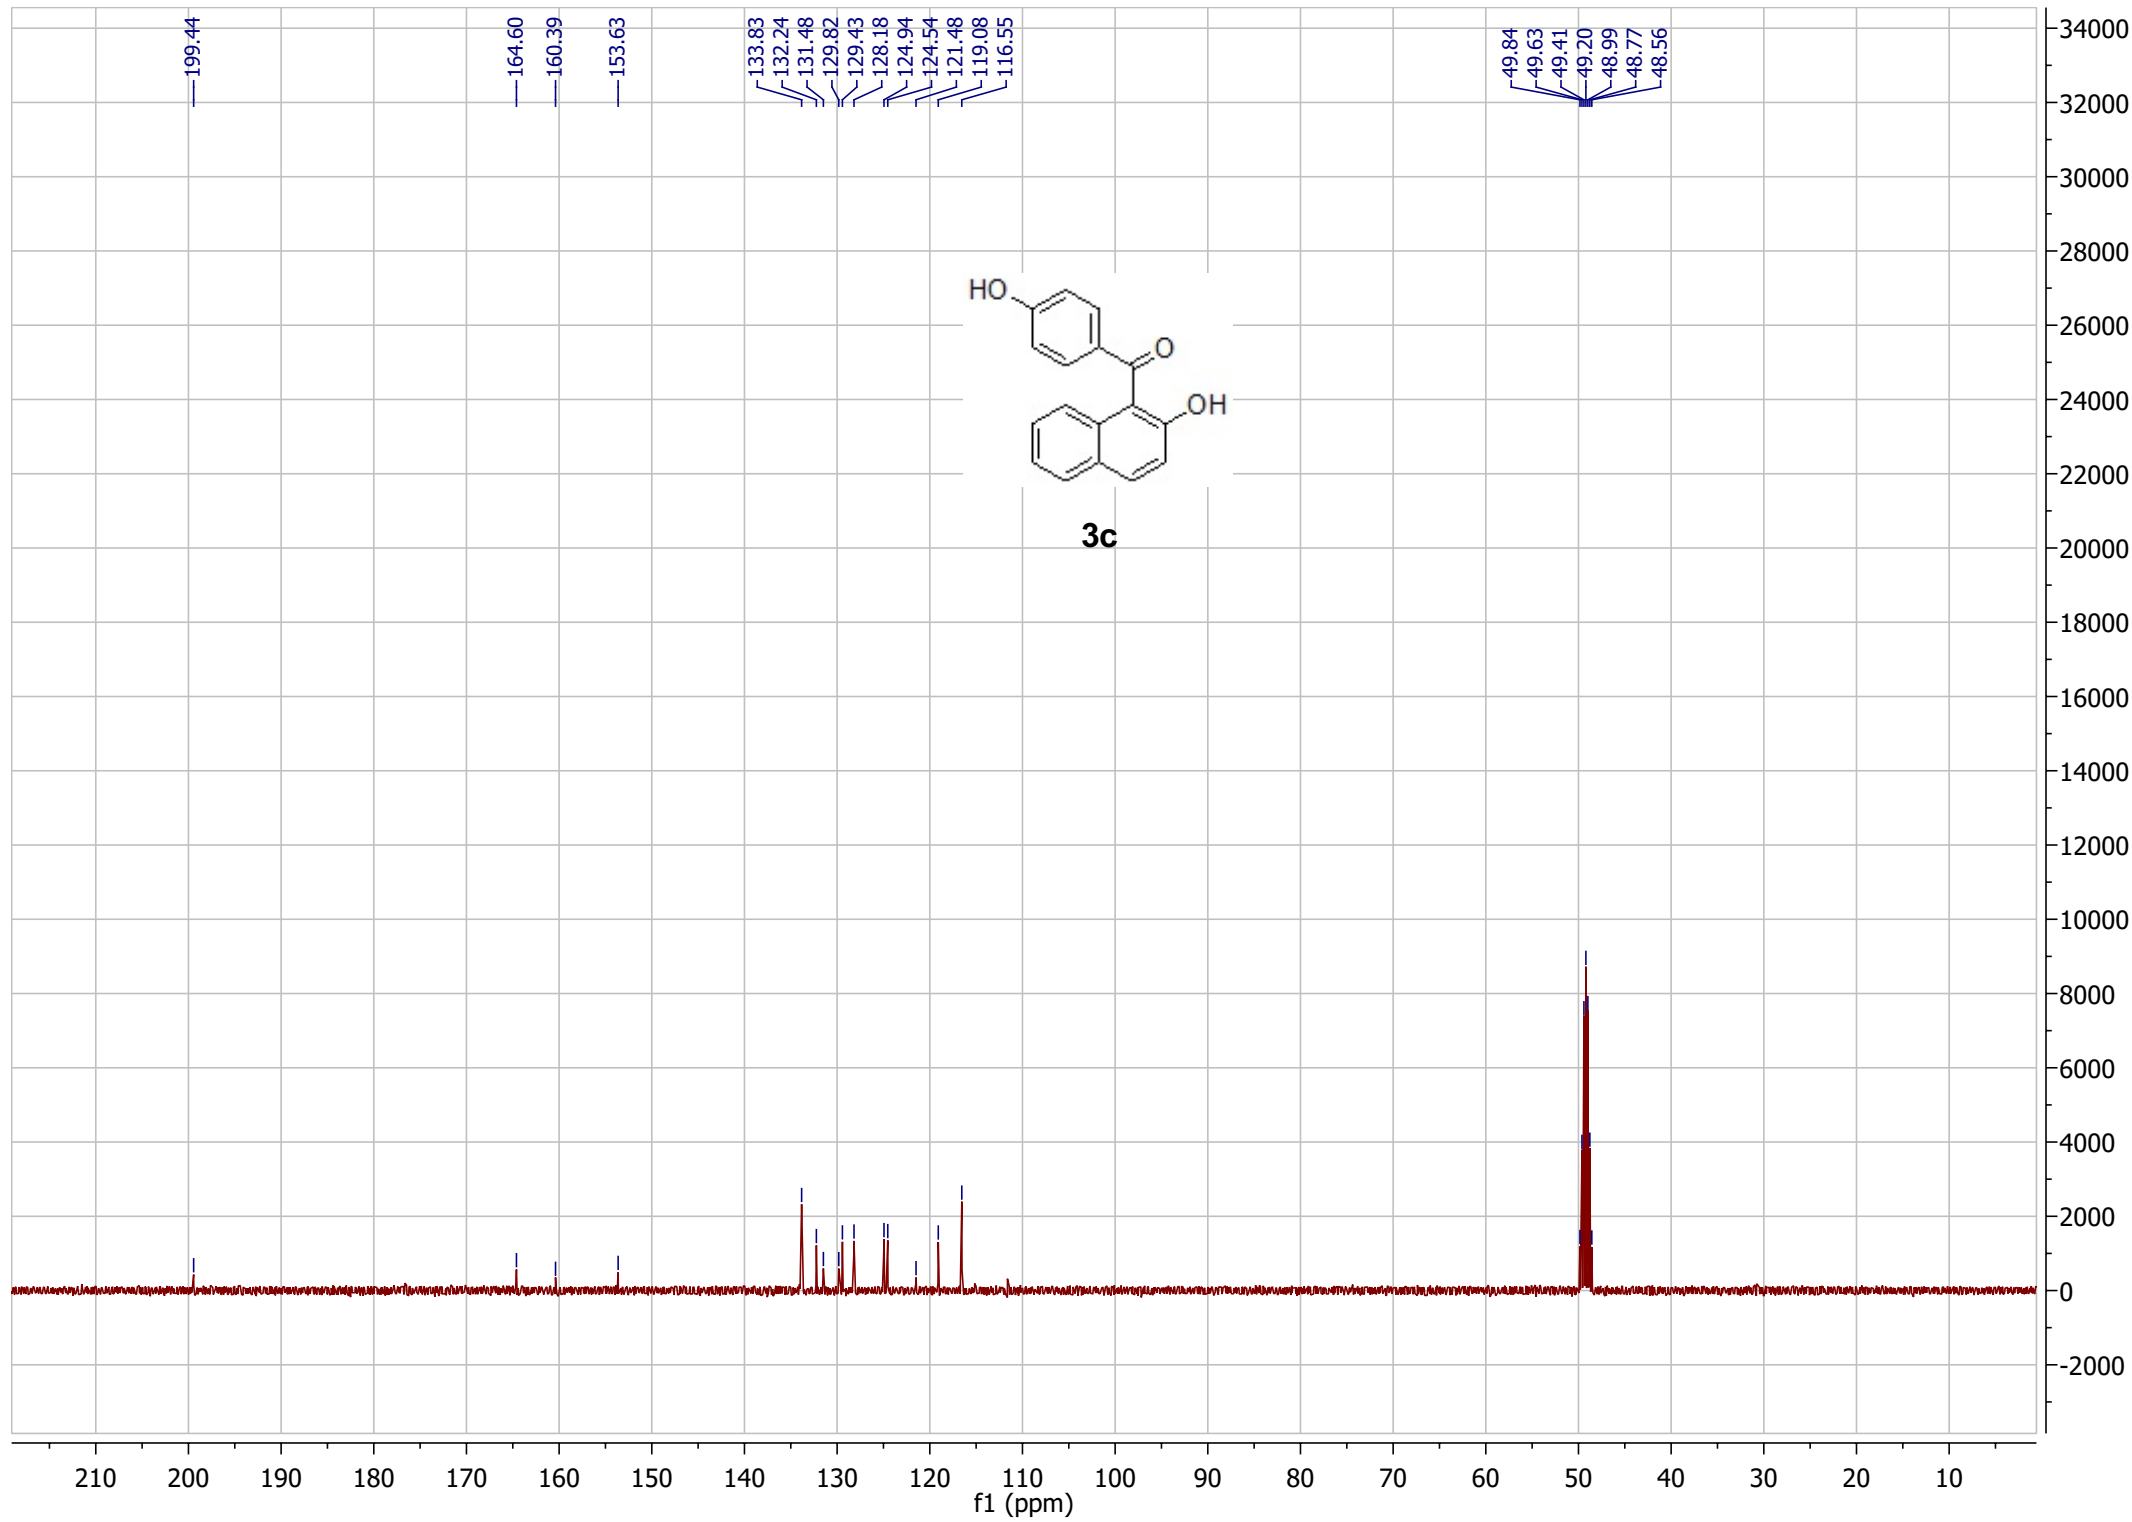



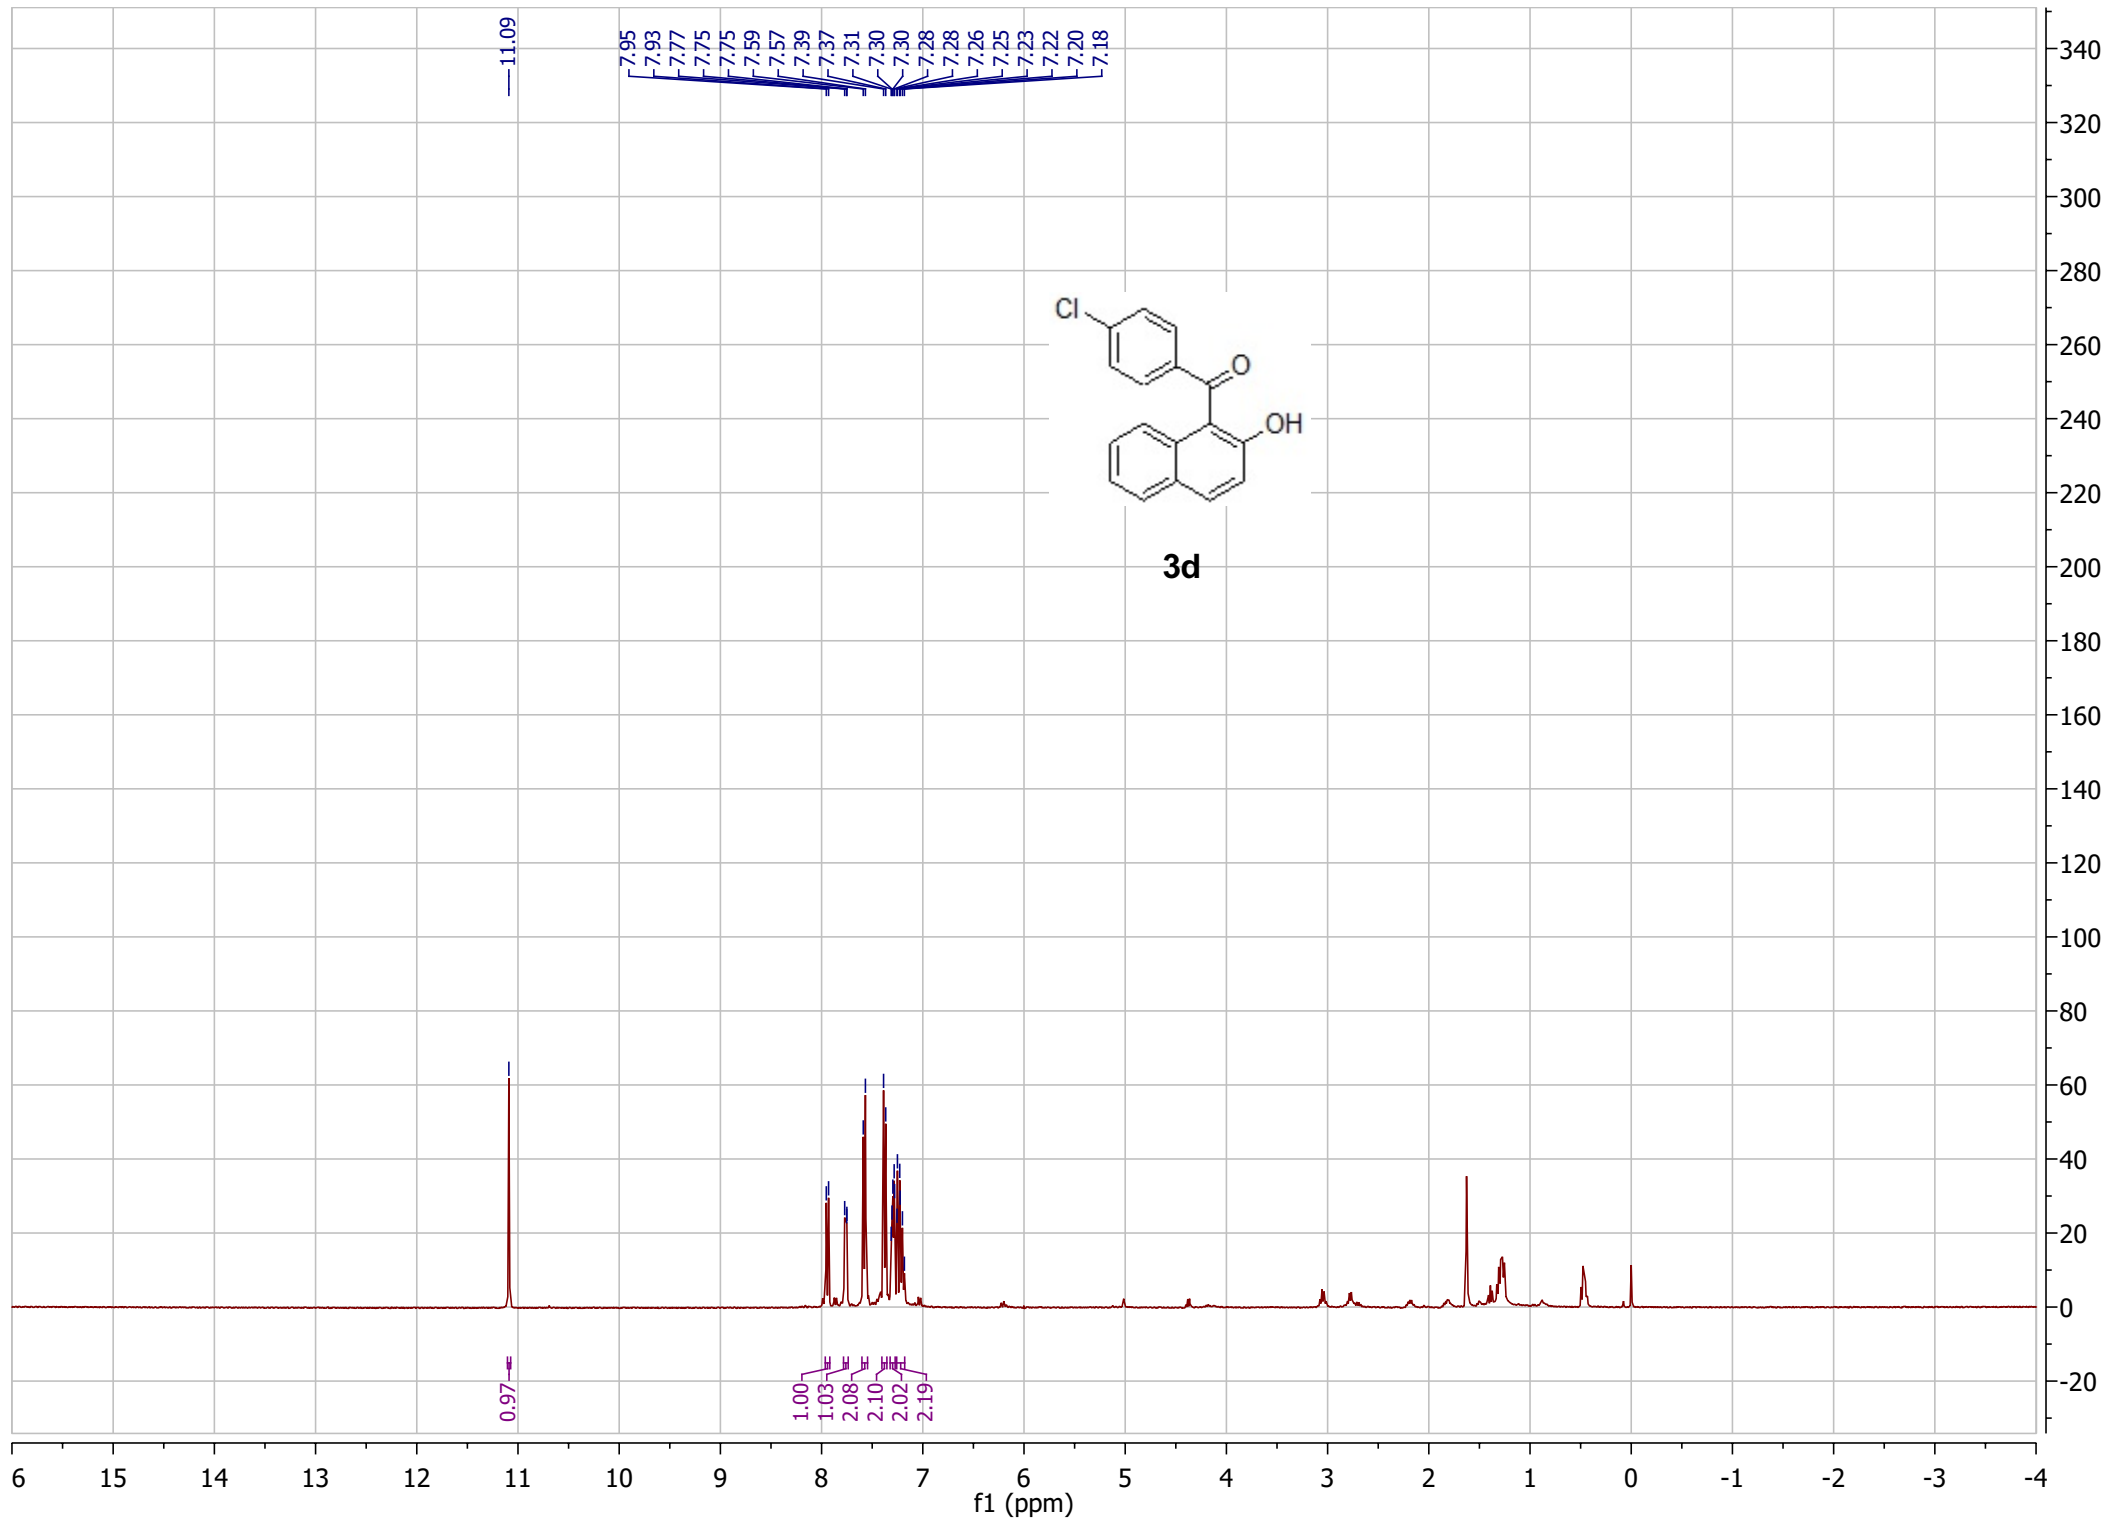

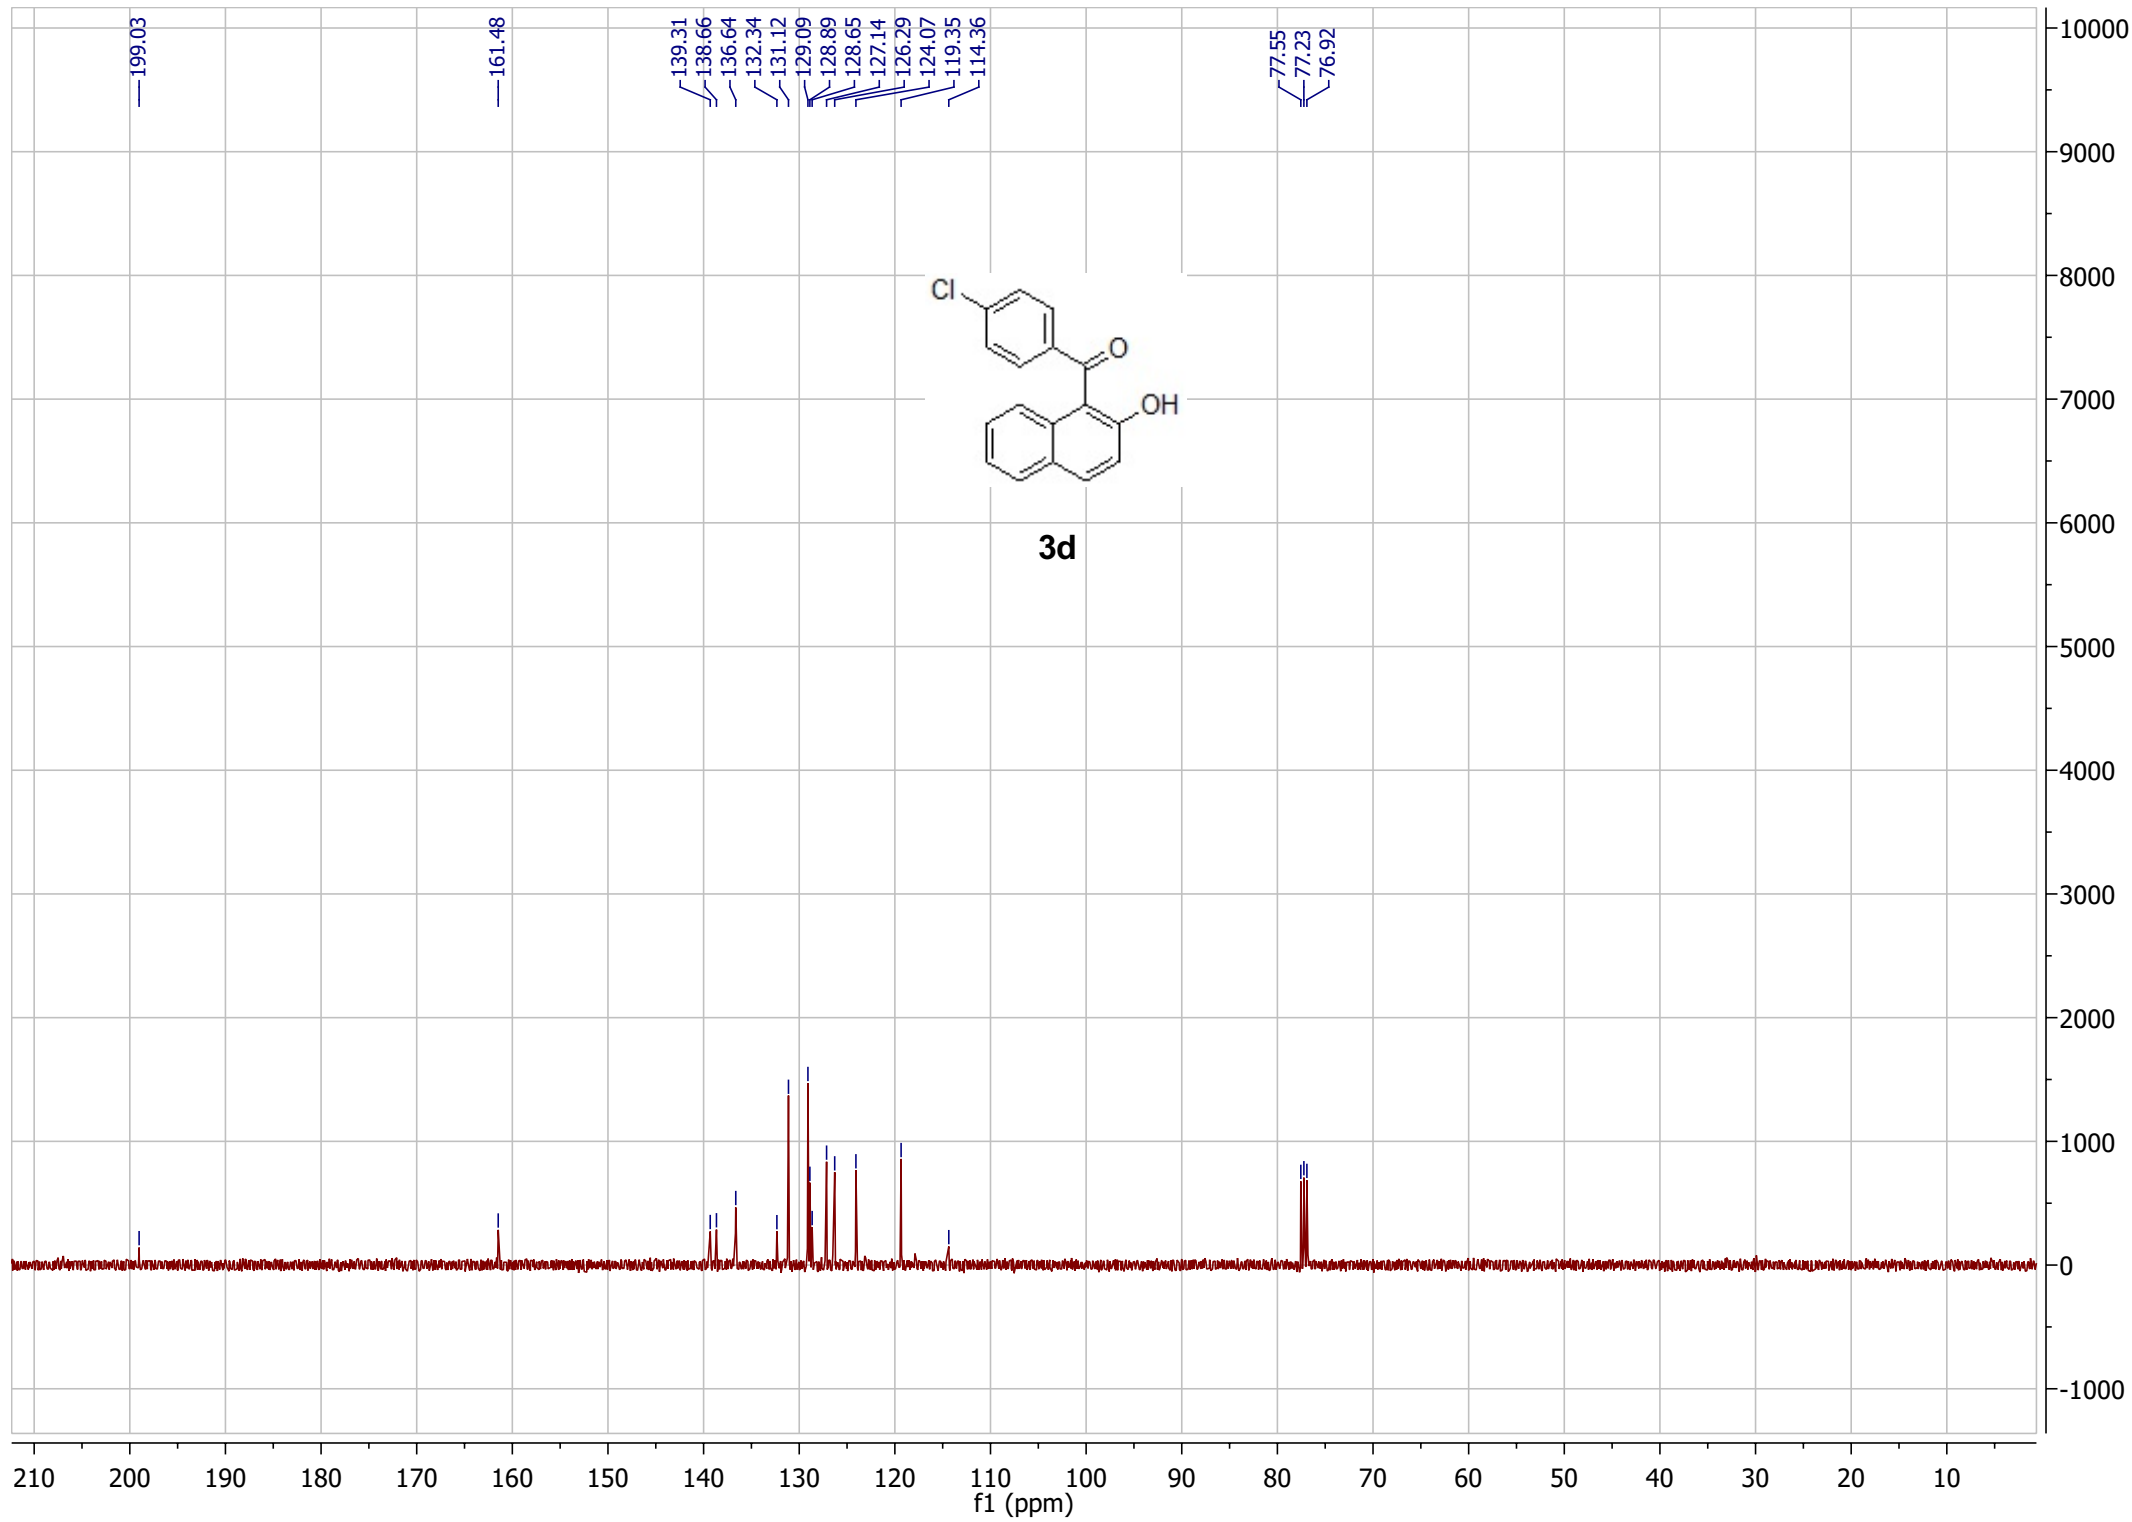

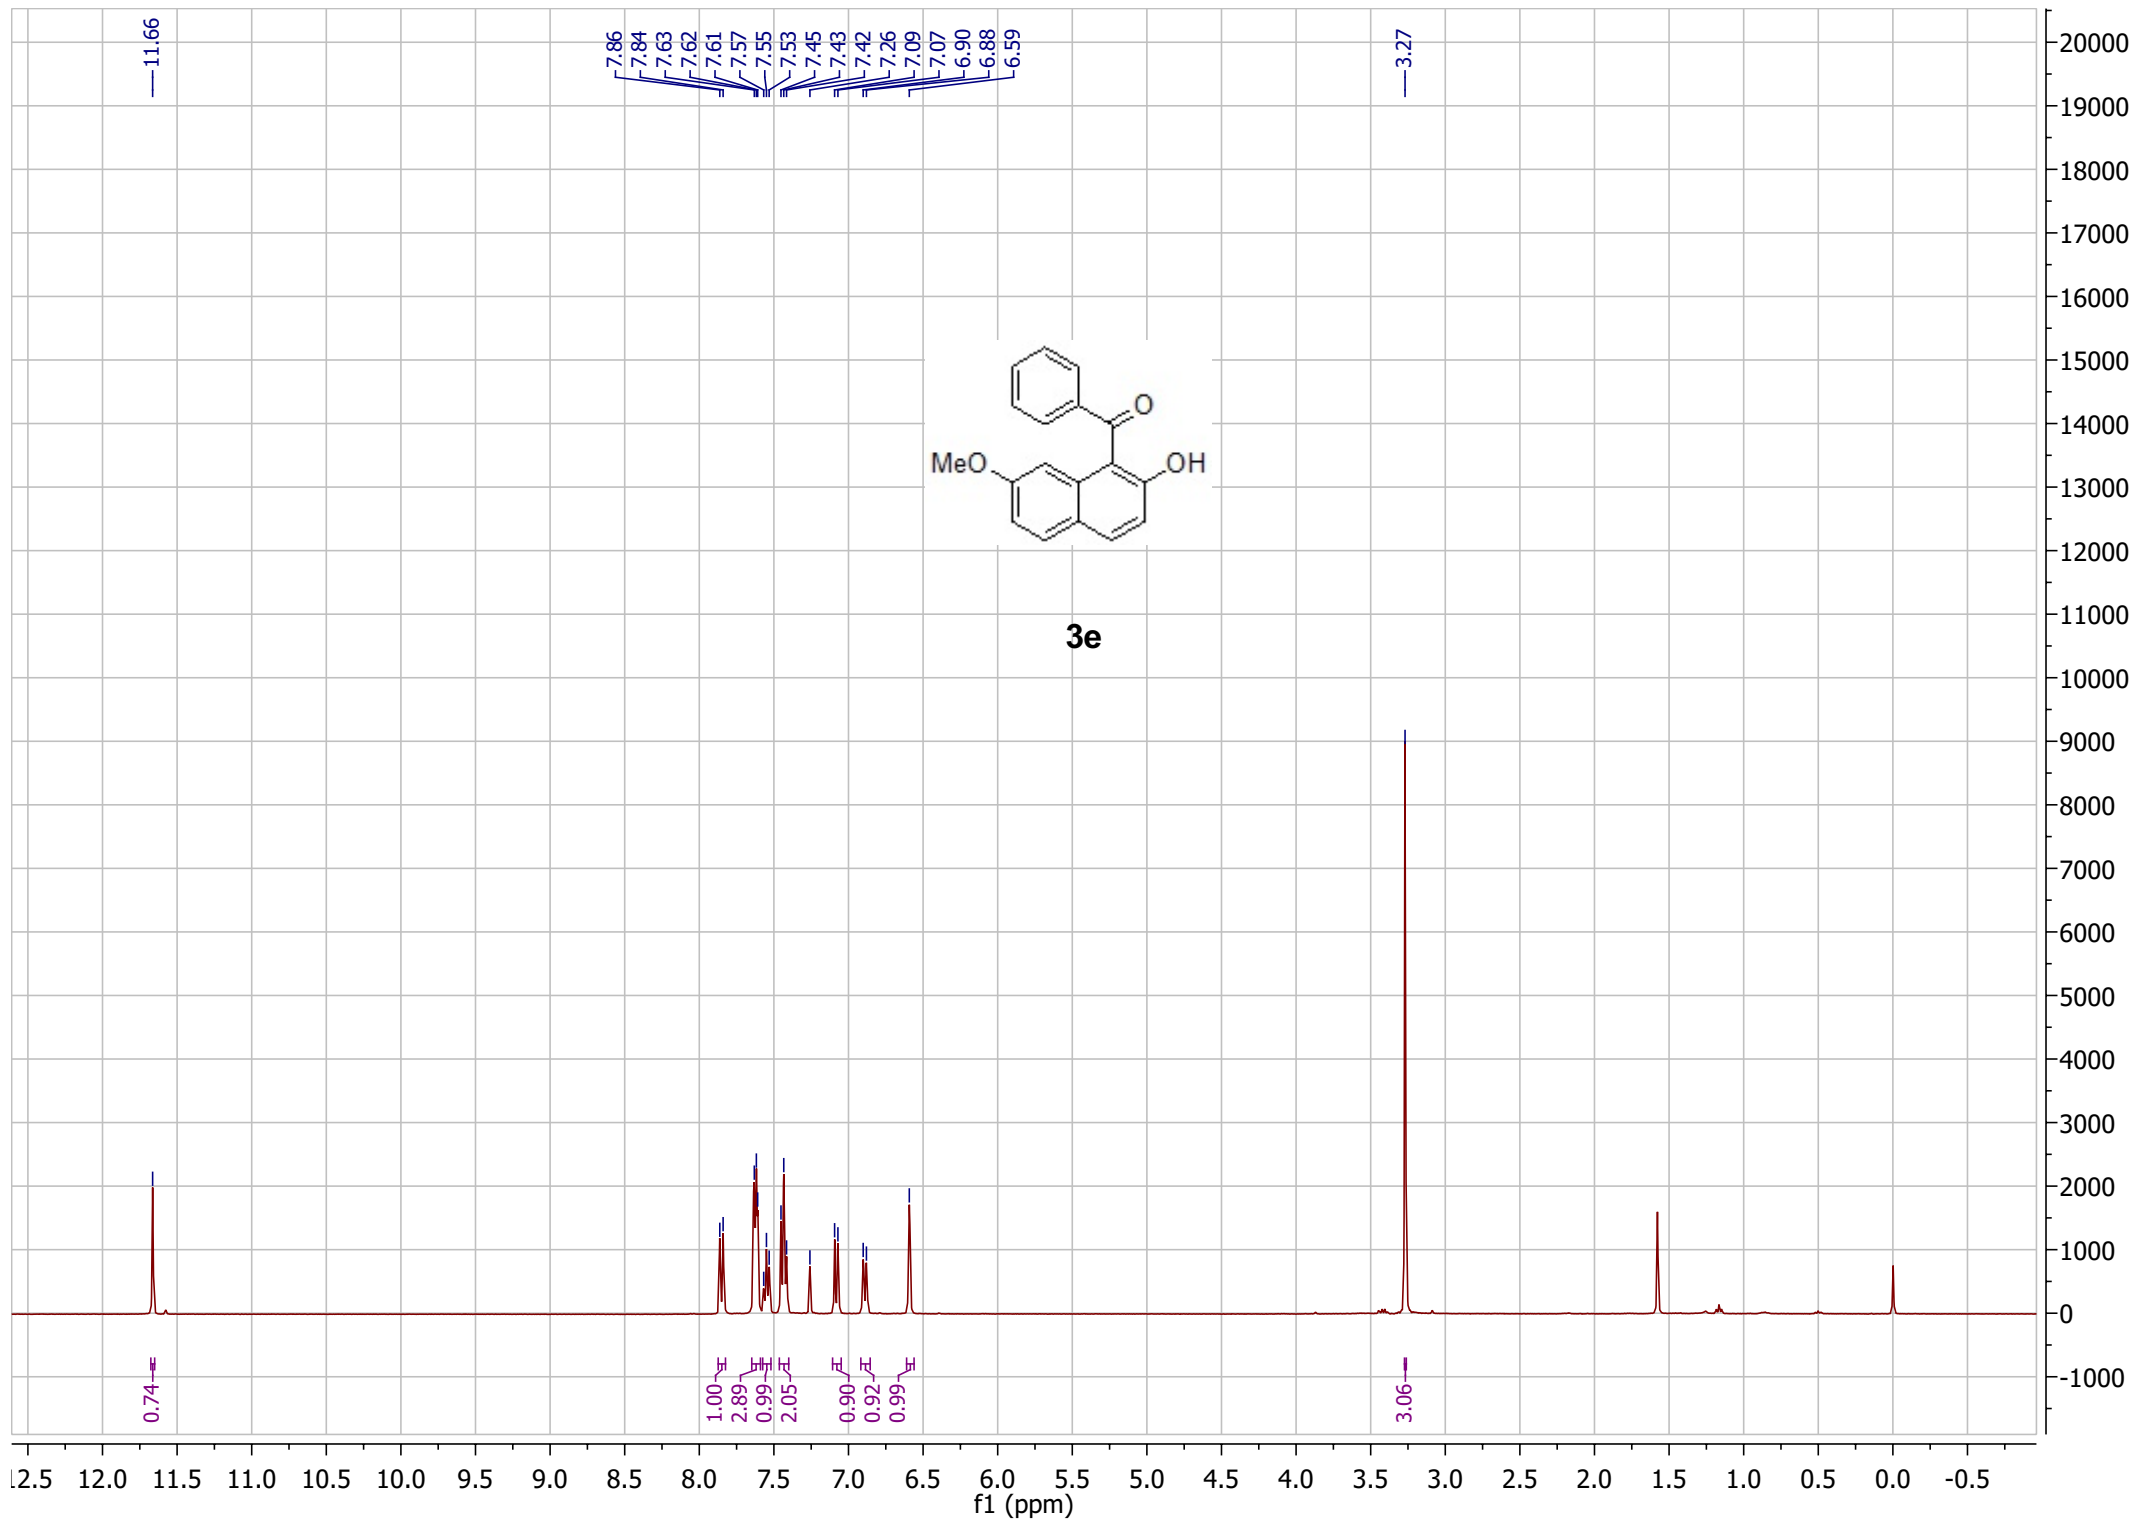

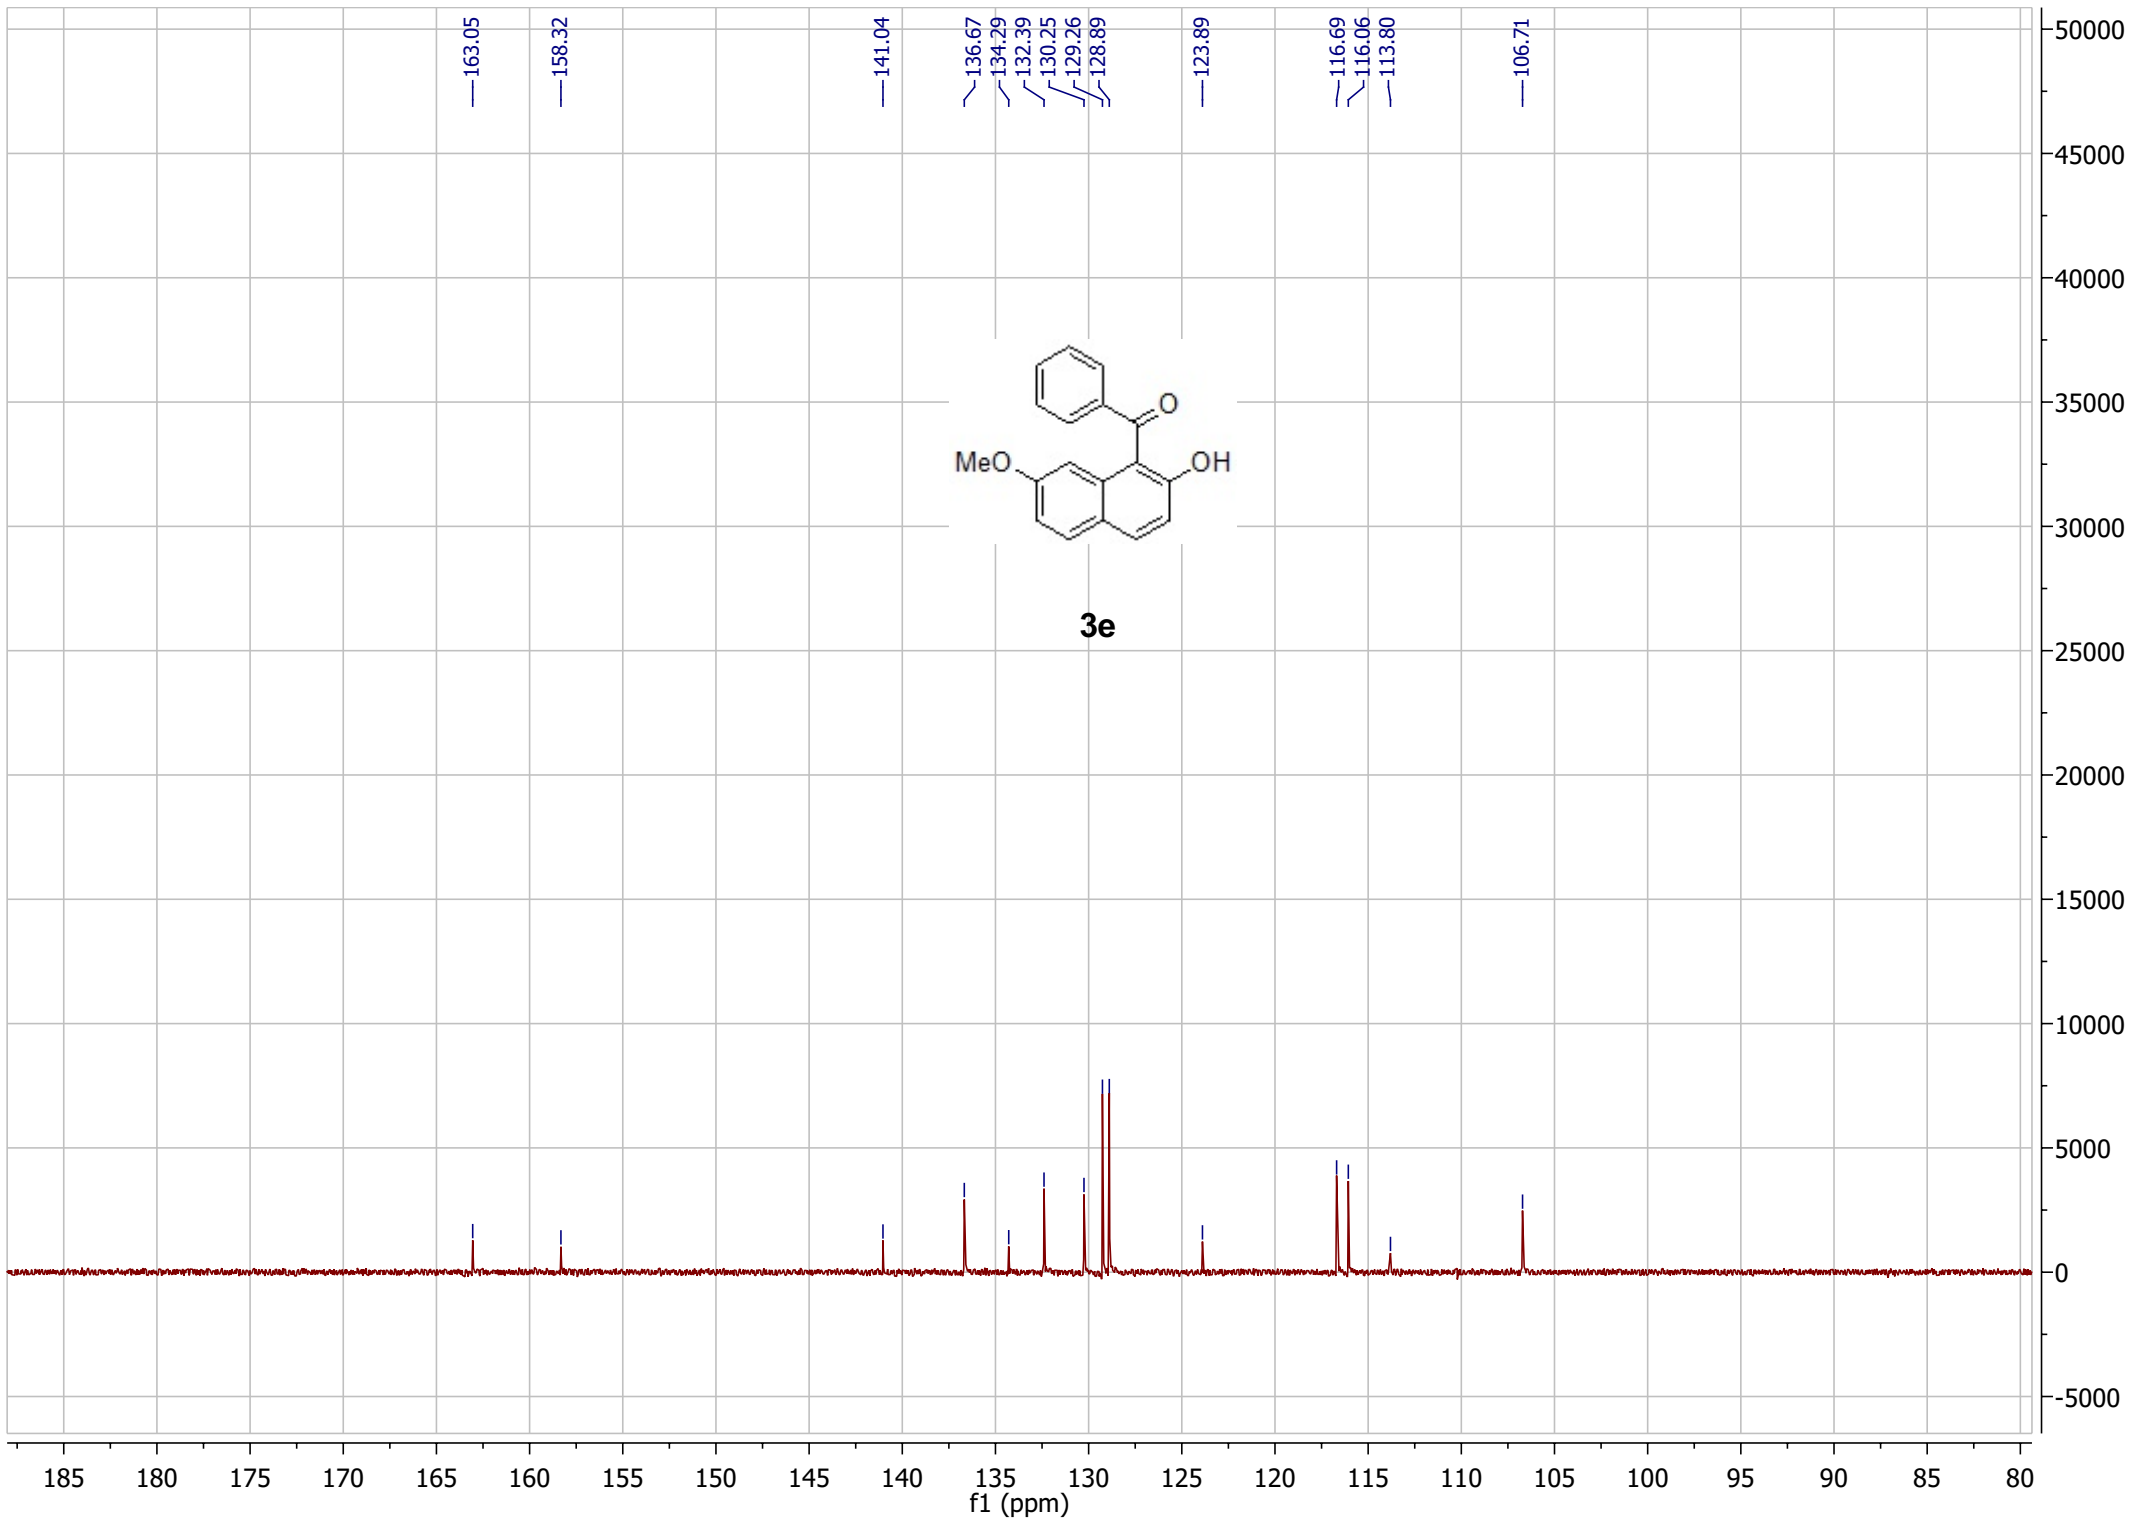

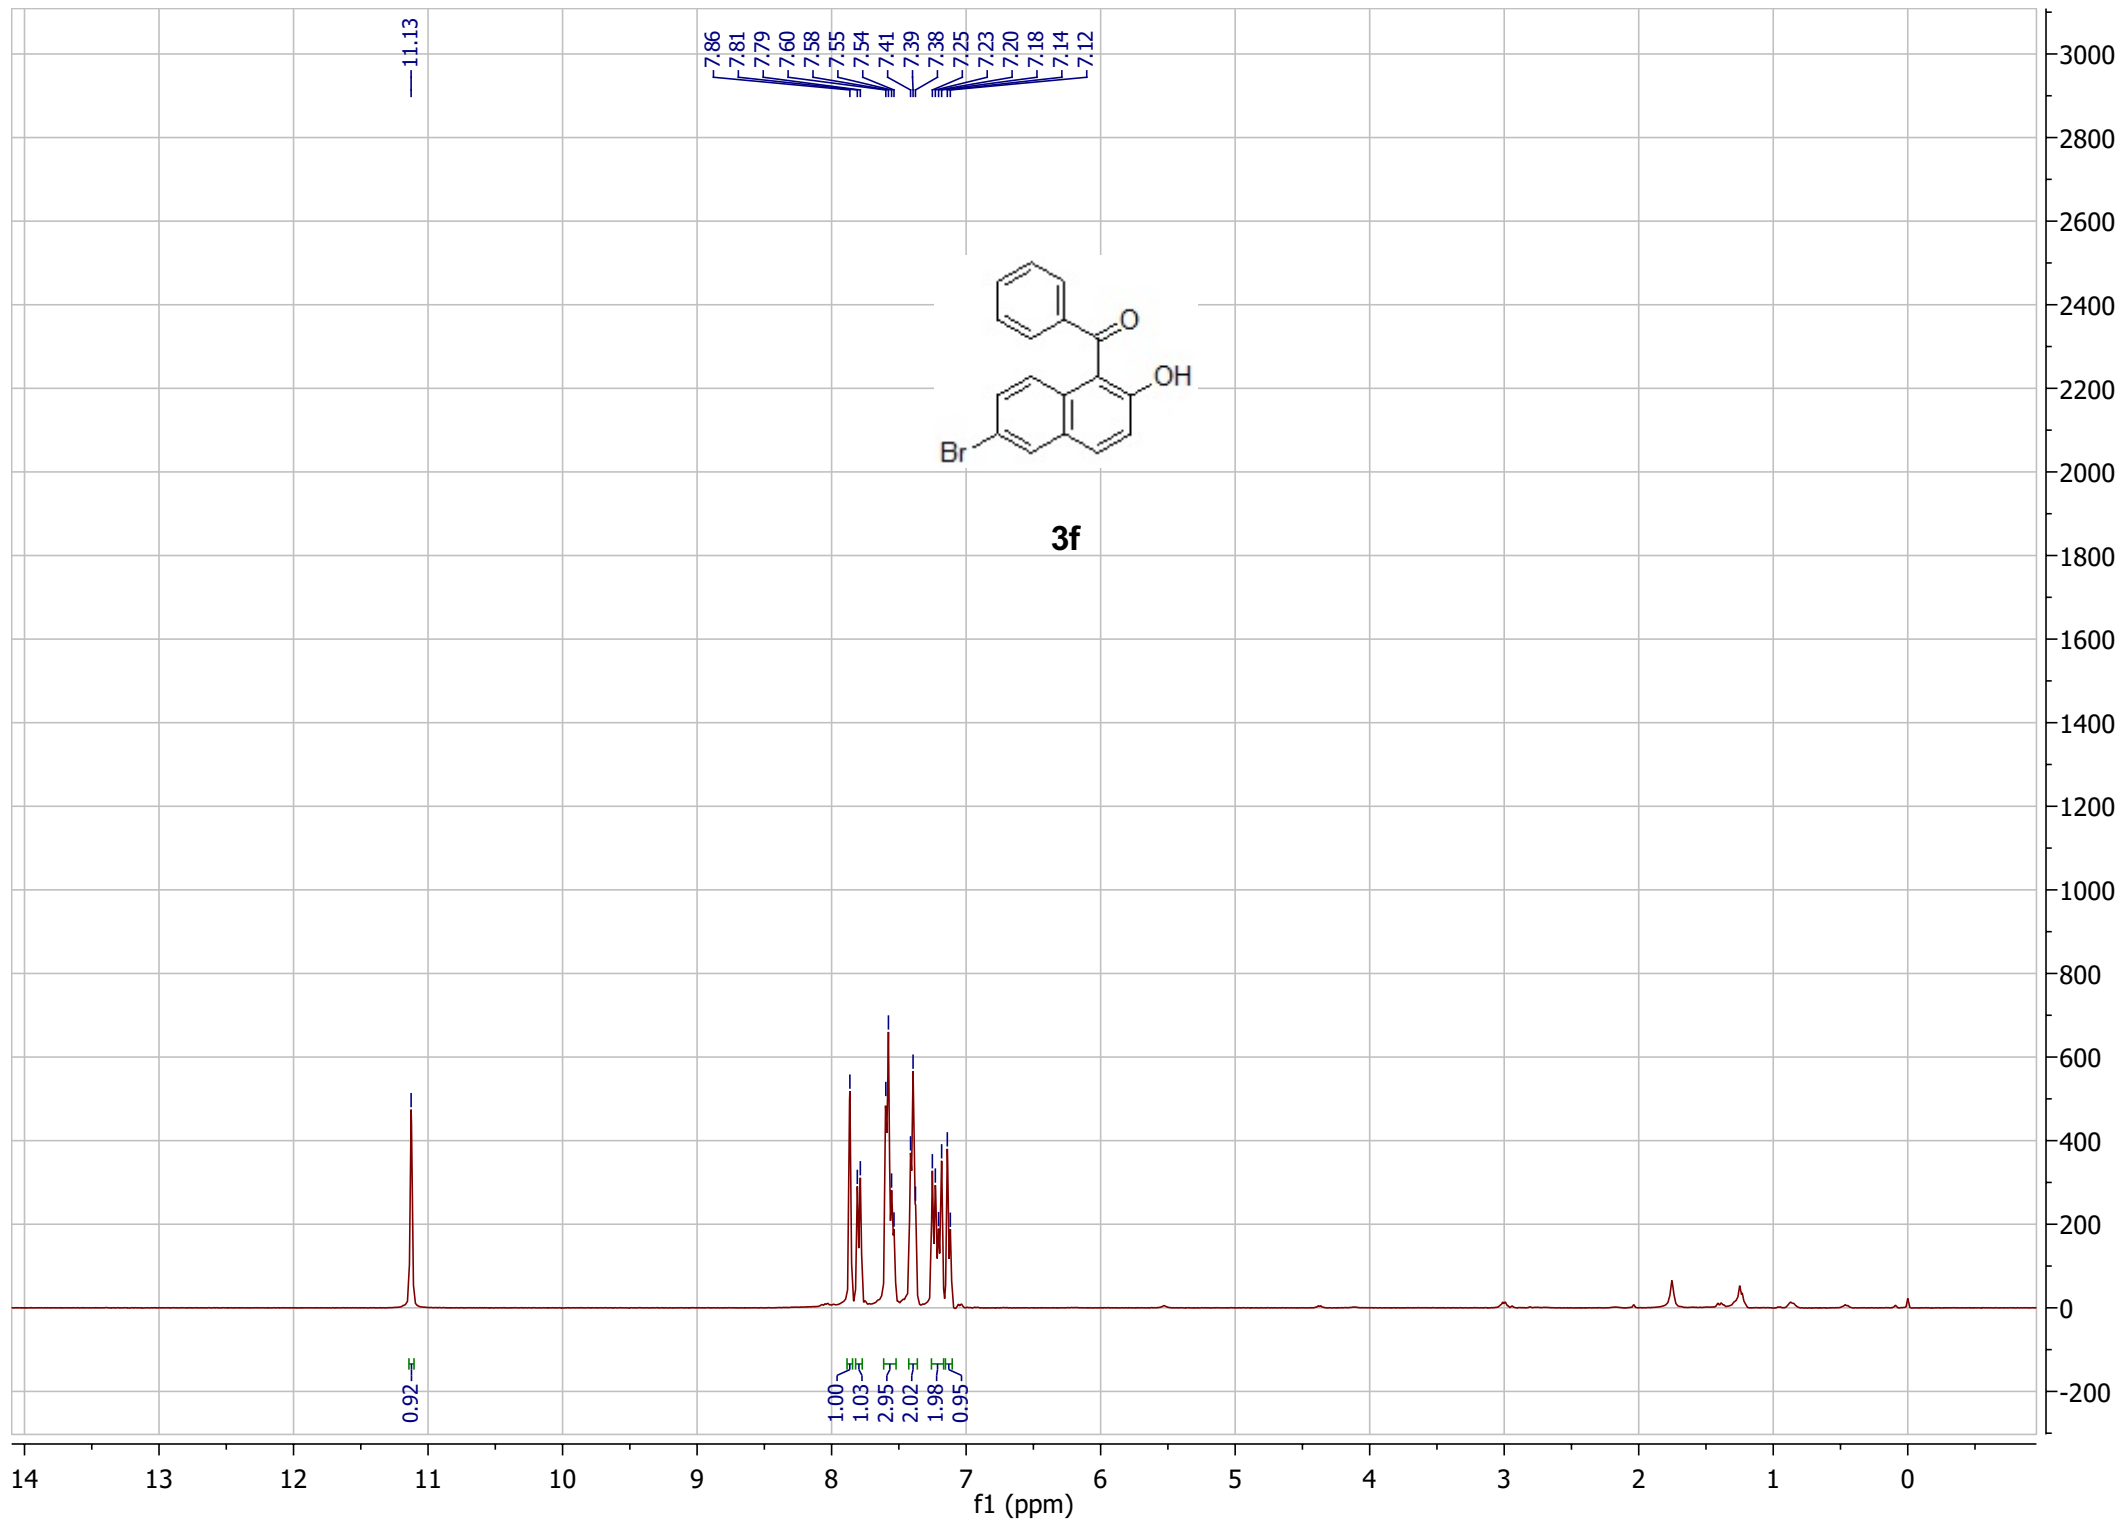

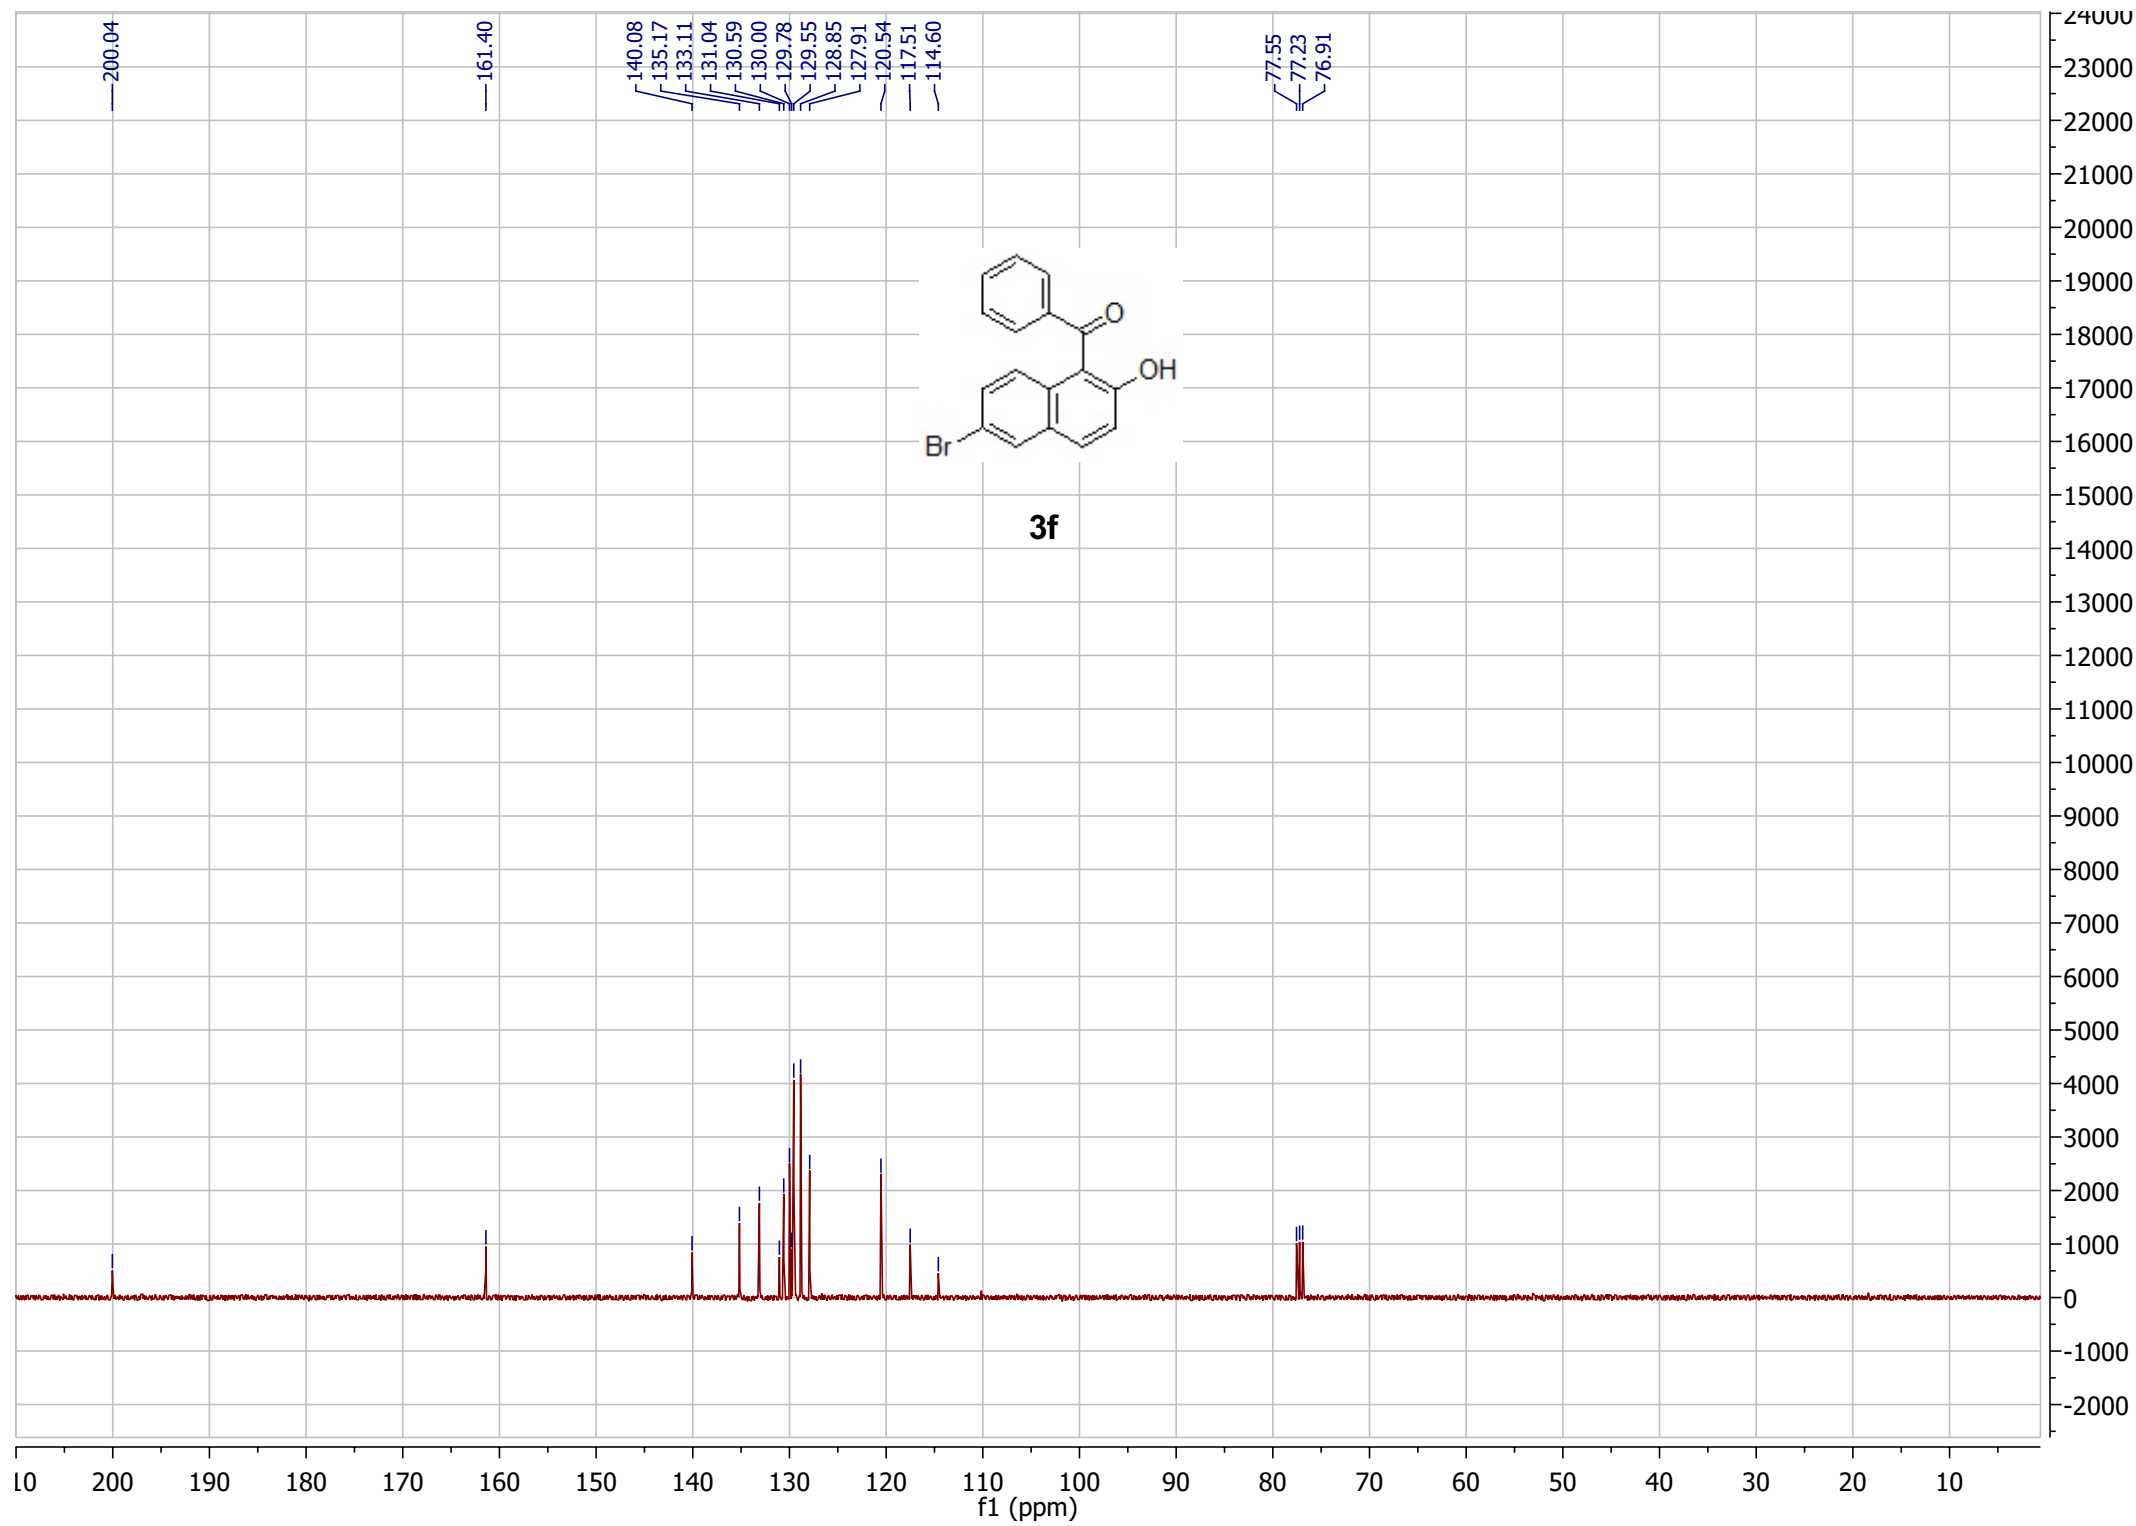

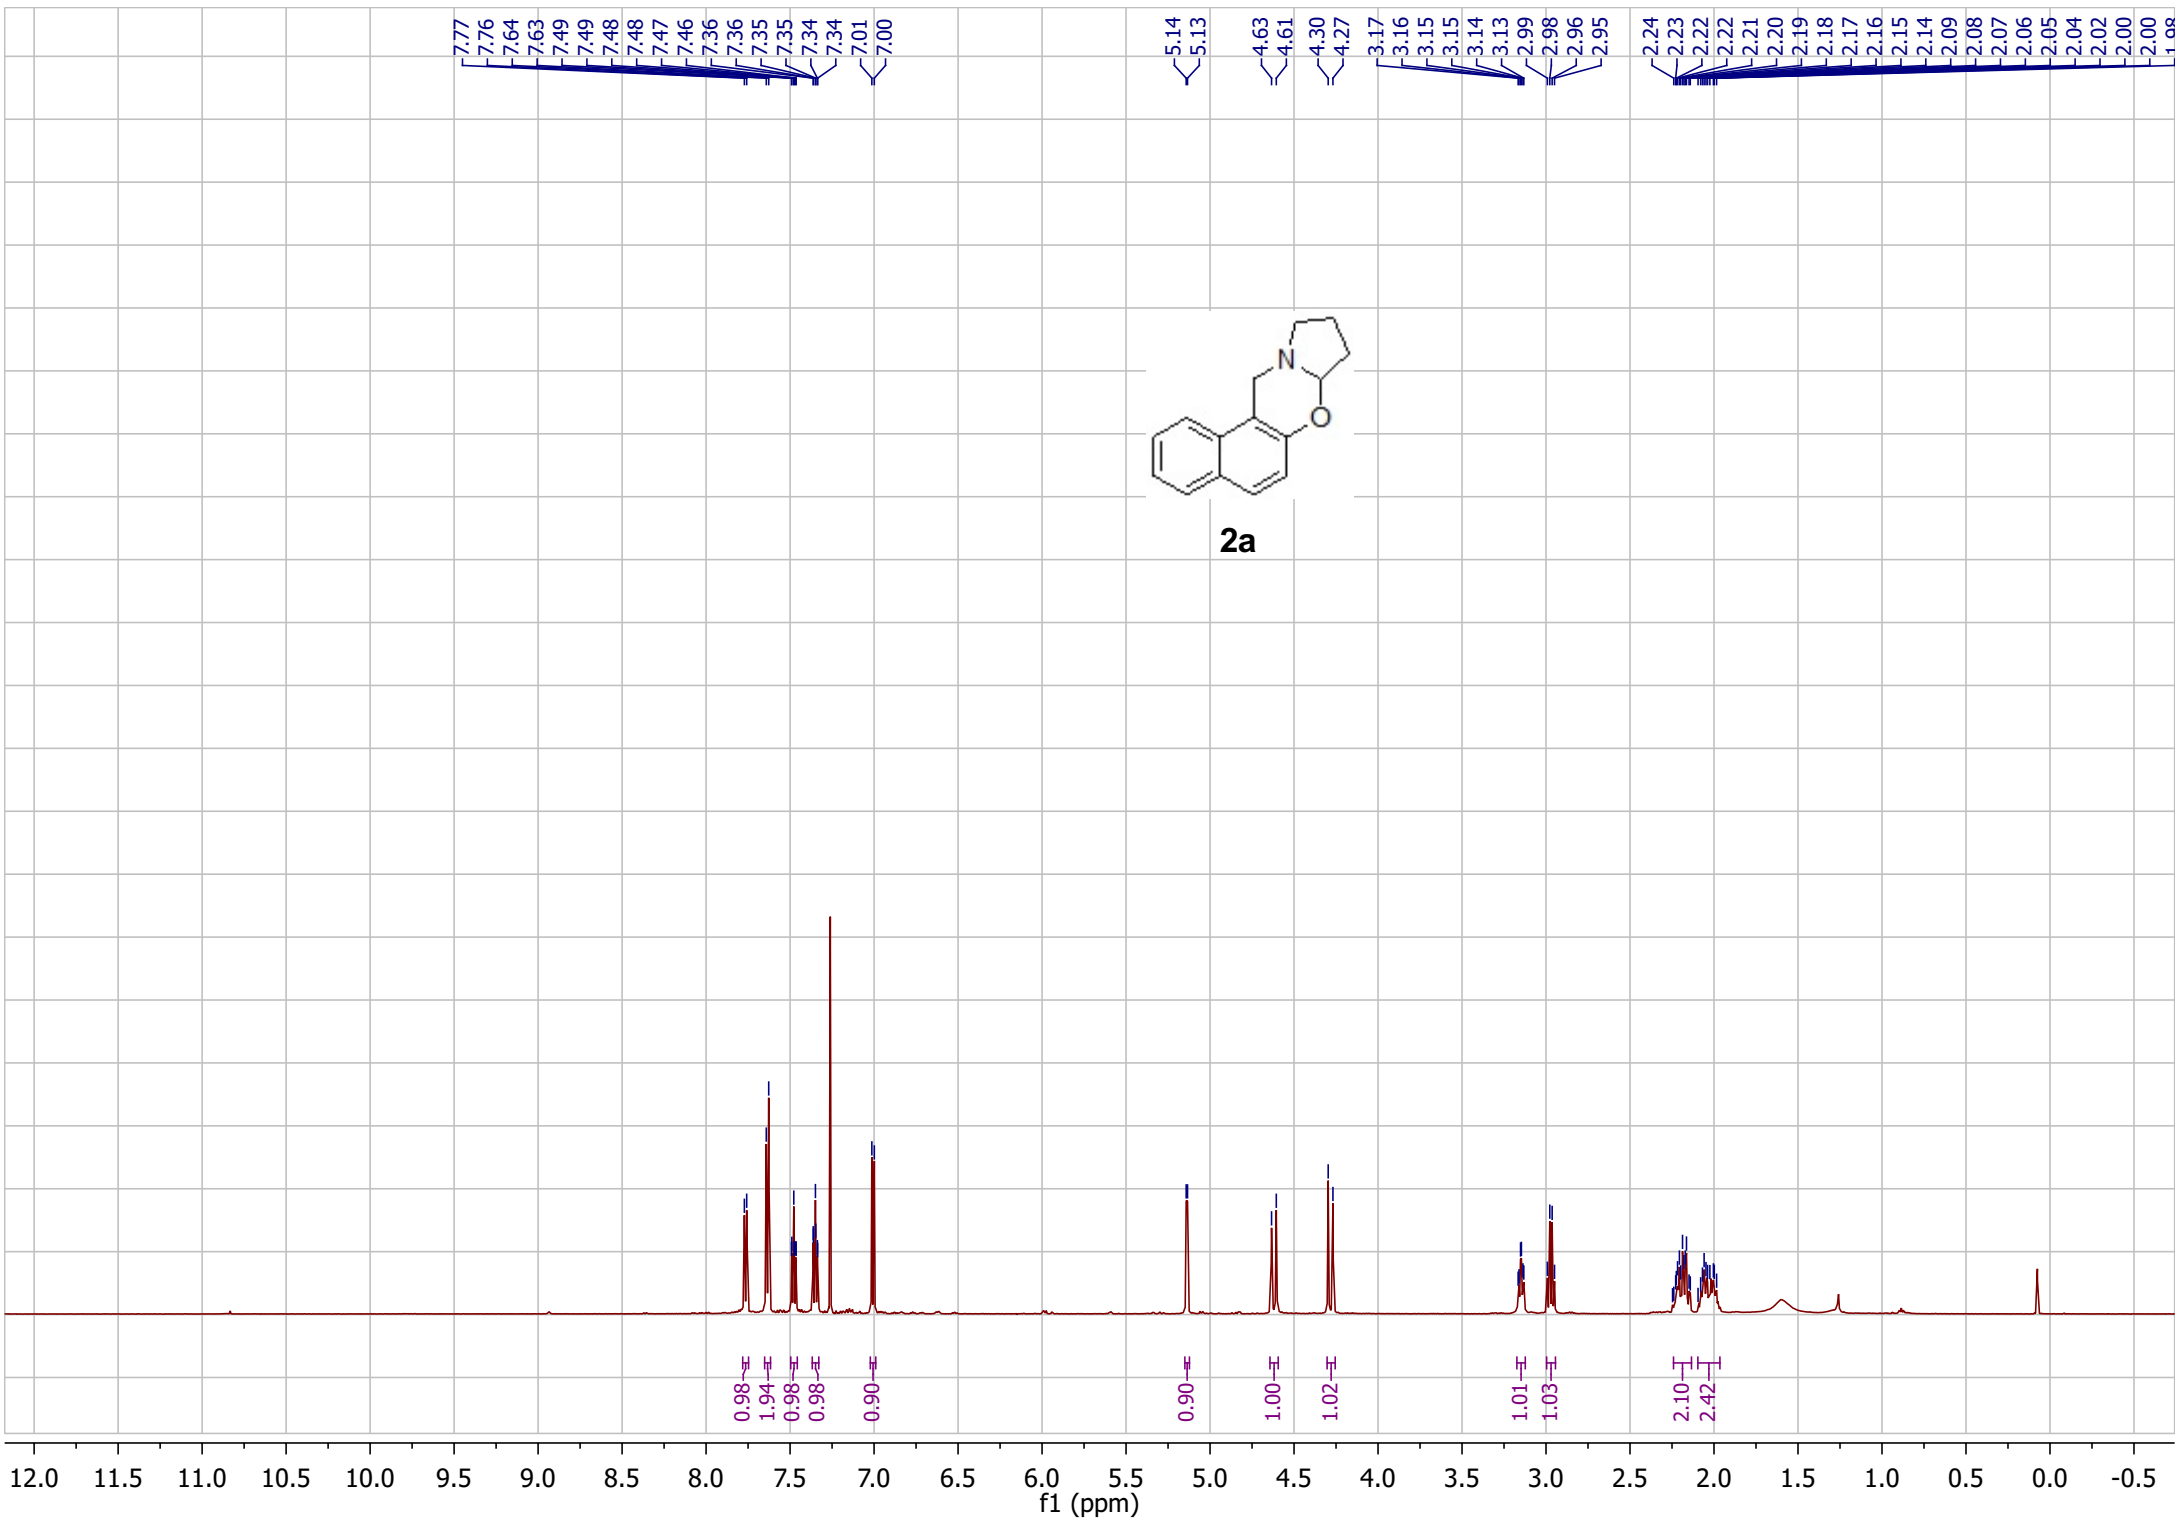

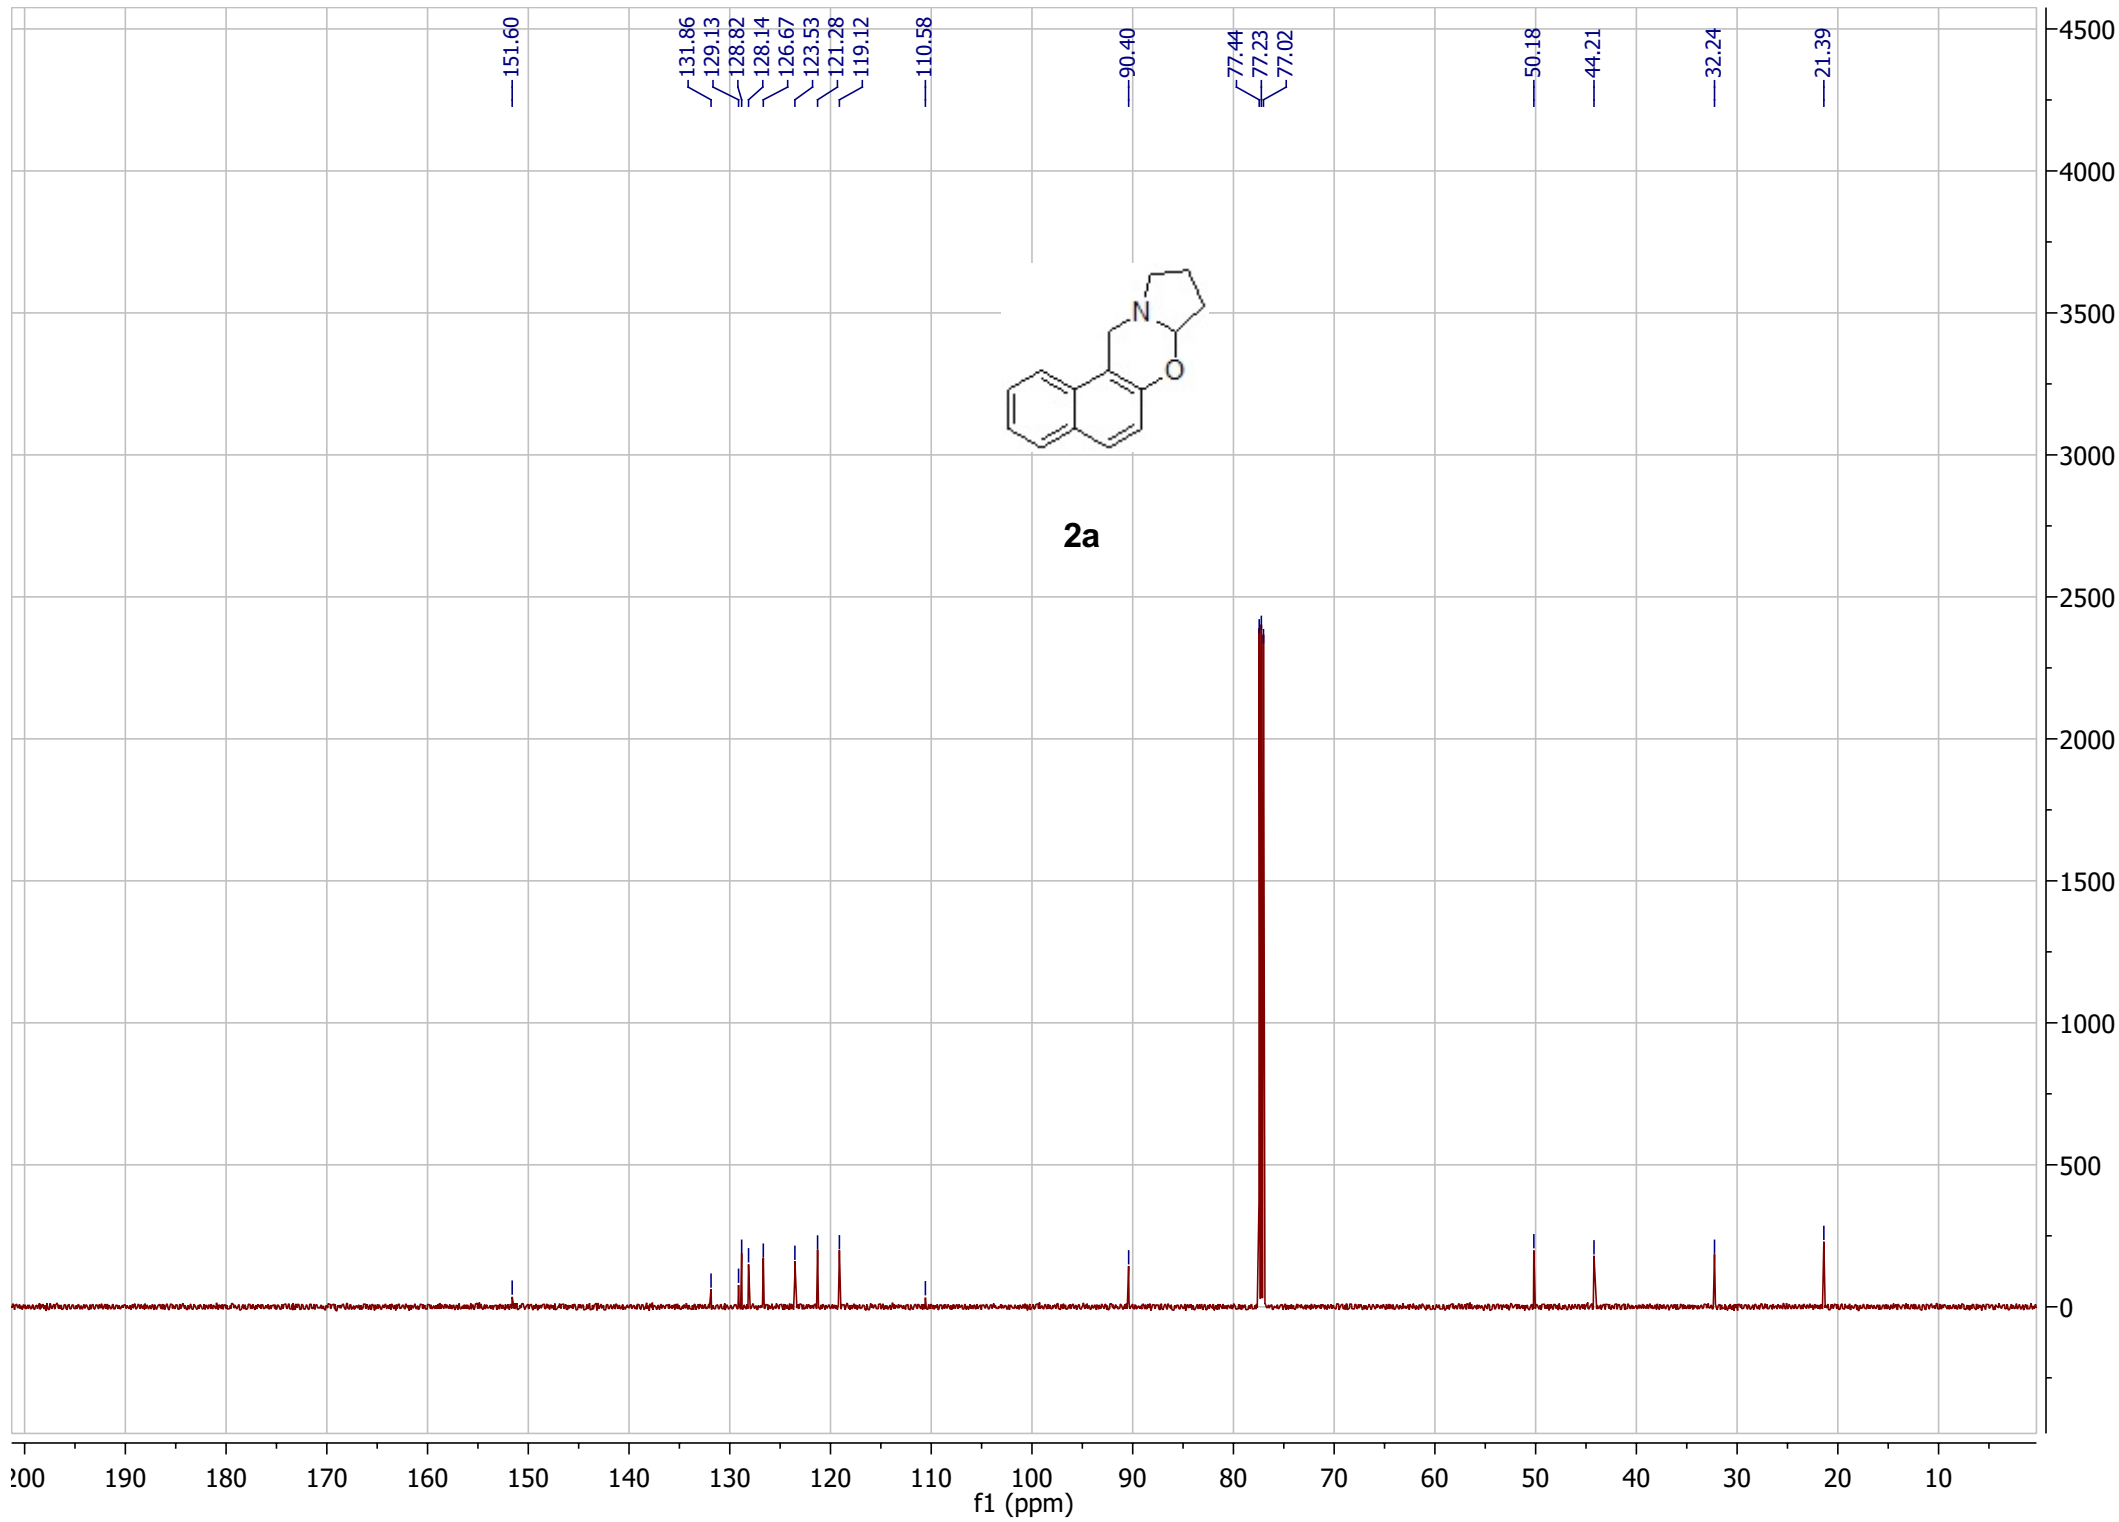



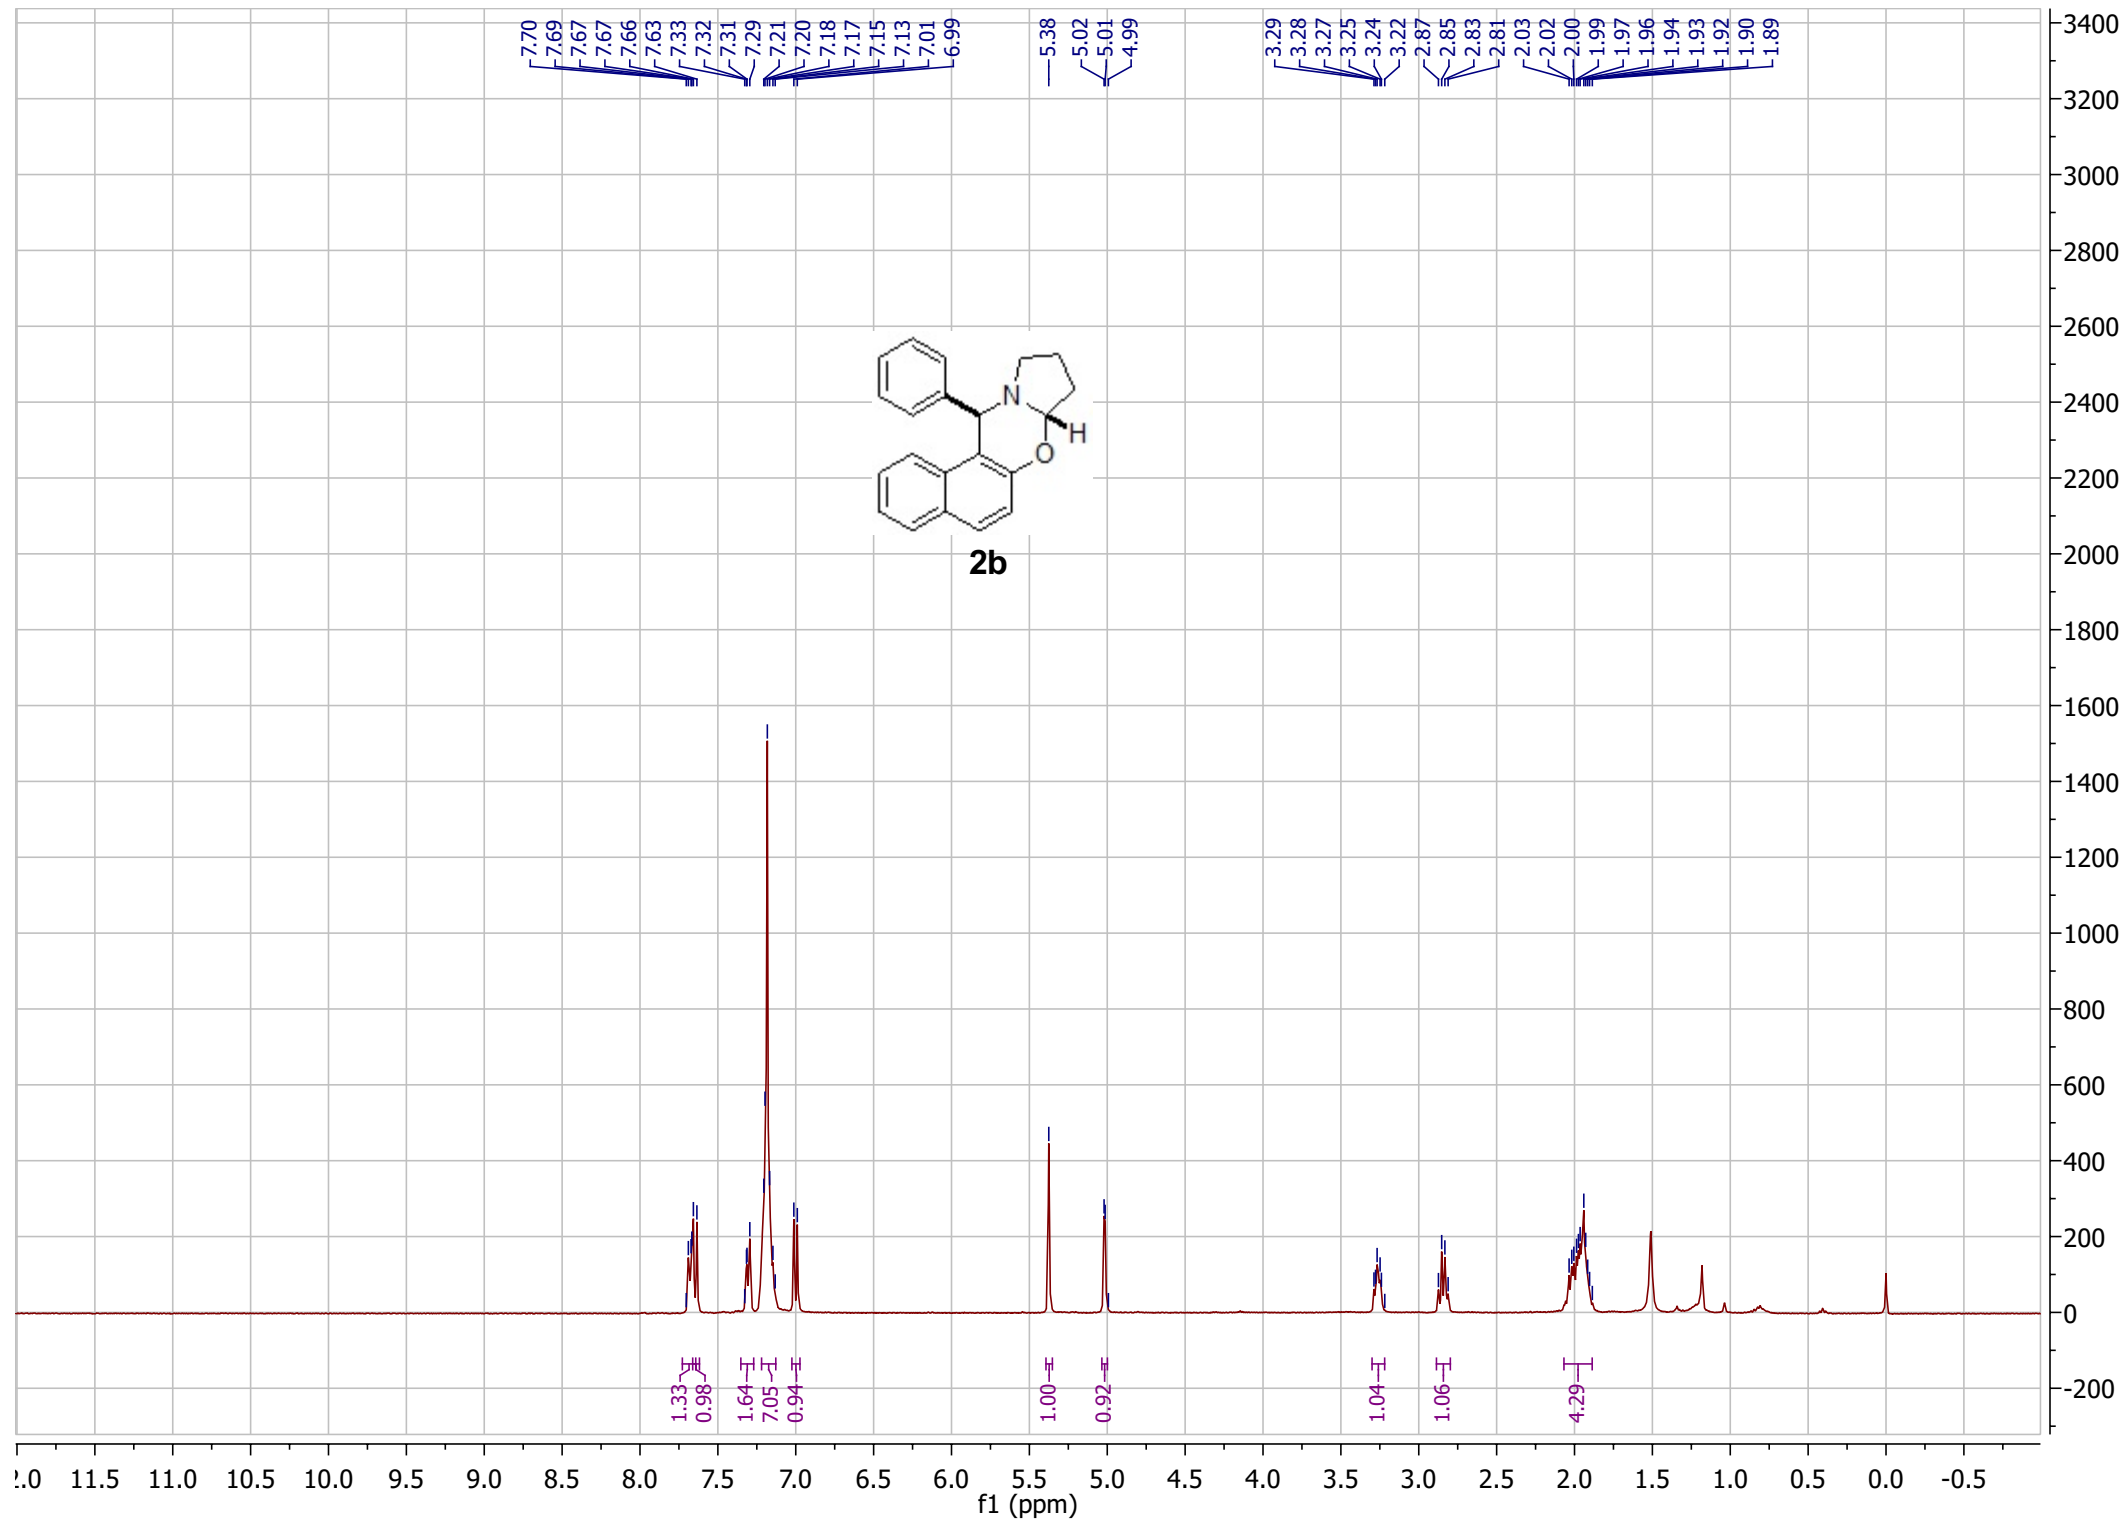

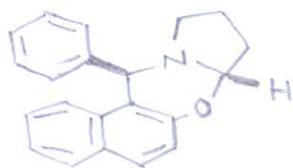

2b

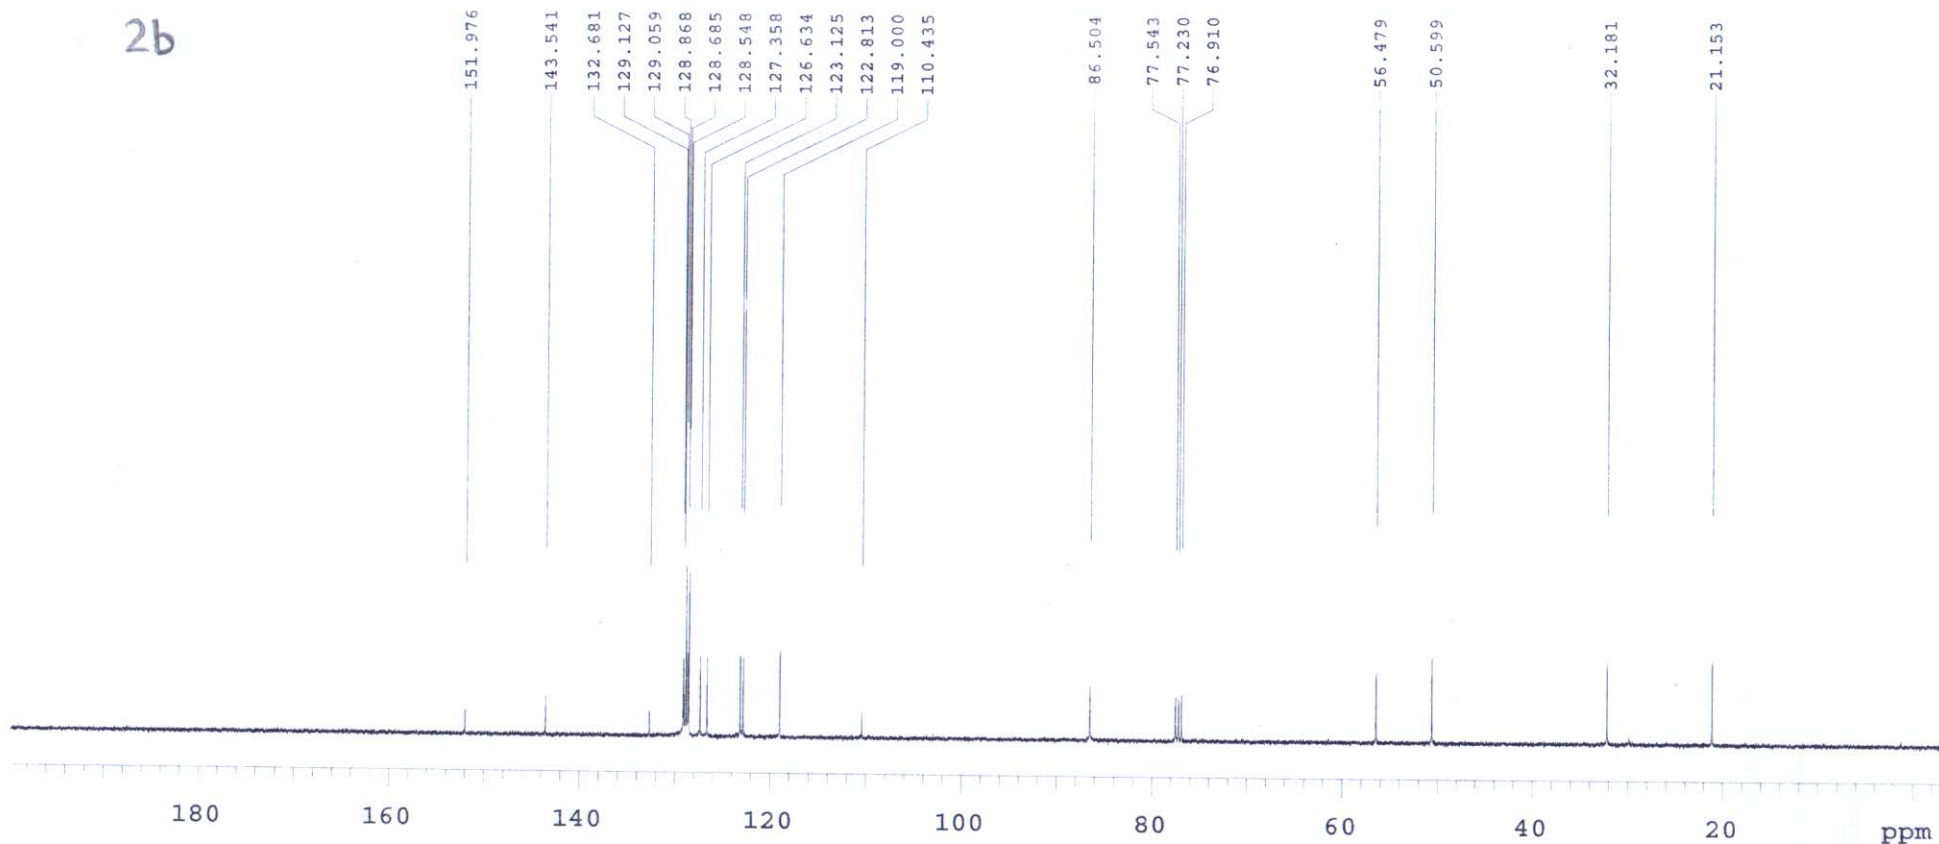

PULSE SEQUENCE

Relax. delay 1.000 sec  
 Pulse 45.0 degrees  
 Acq. time 1.304 sec  
 Width 25125.6 Hz  
 240 repetitions

OBSERVE C13, 100.5425932  
 DECOUPLE H1, 399.8529994  
 Power 42 dB  
 continuously on  
 WALTZ-16 modulated

DATA PROCESSING  
 Line broadening 0.5 Hz  
 FT size 65536  
 Total time 9 minutes

CKJ-2-65A-13C

Solvent: cdcl3  
 Temp. 25.0 C / 298.1 K  
 Operator: chem  
 Mercury-400 "IITG-NMR"

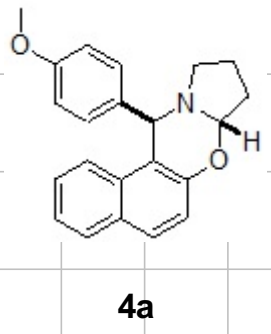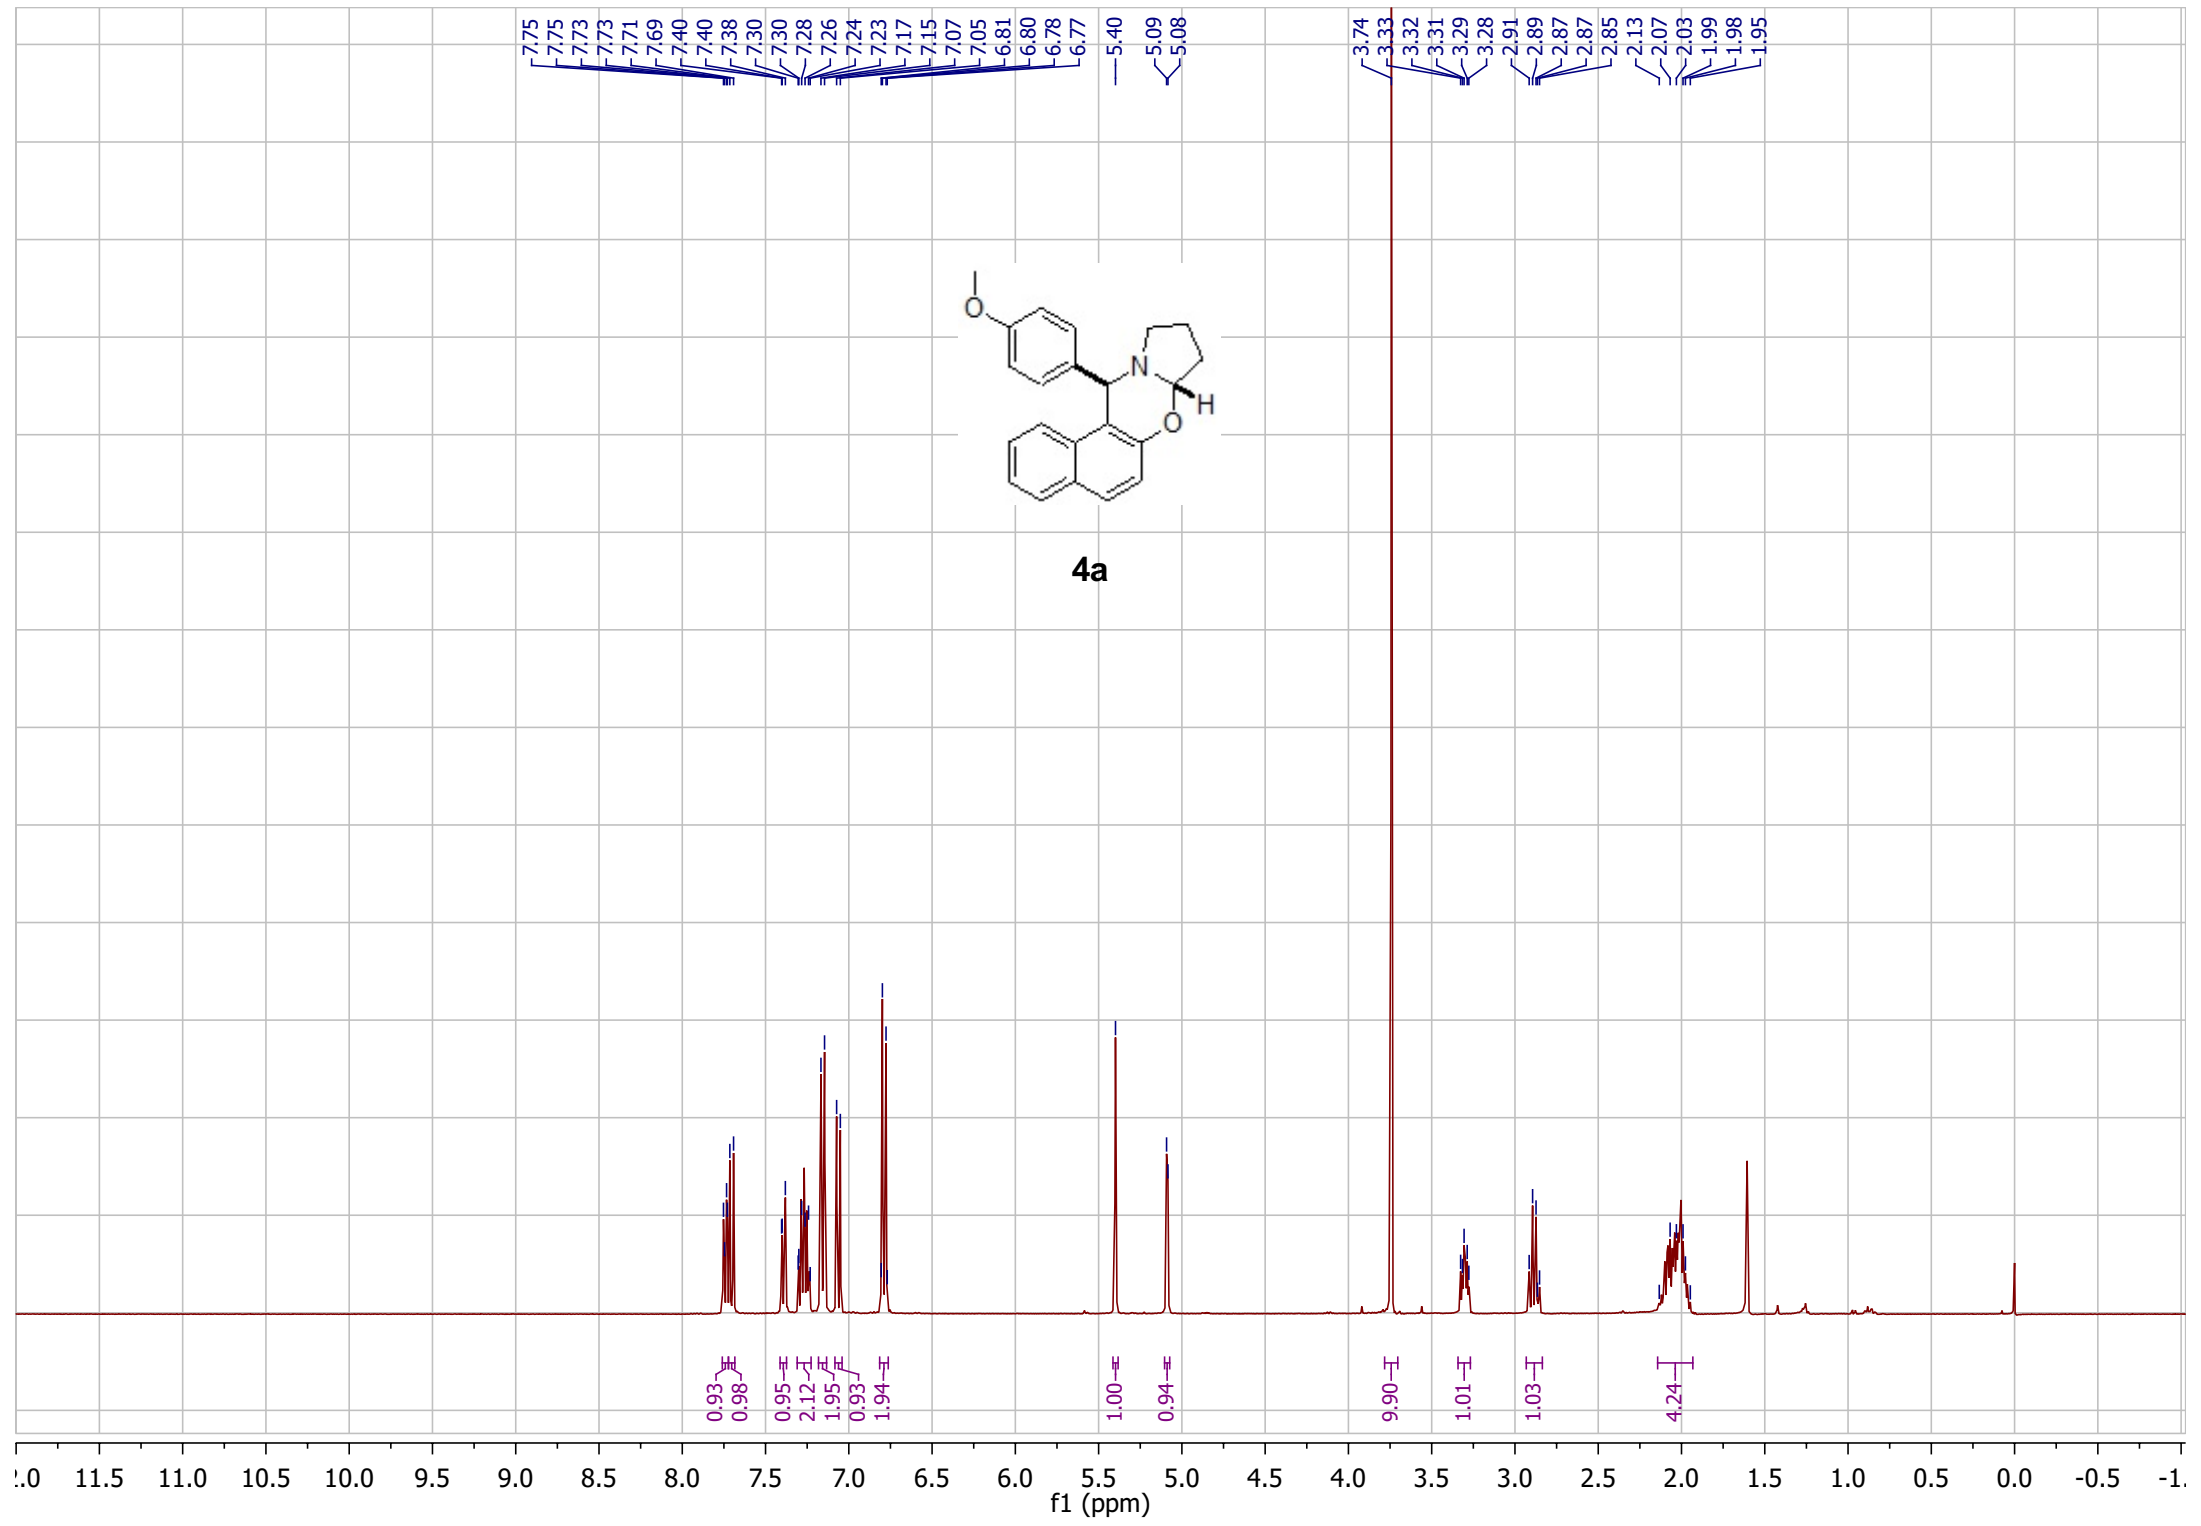

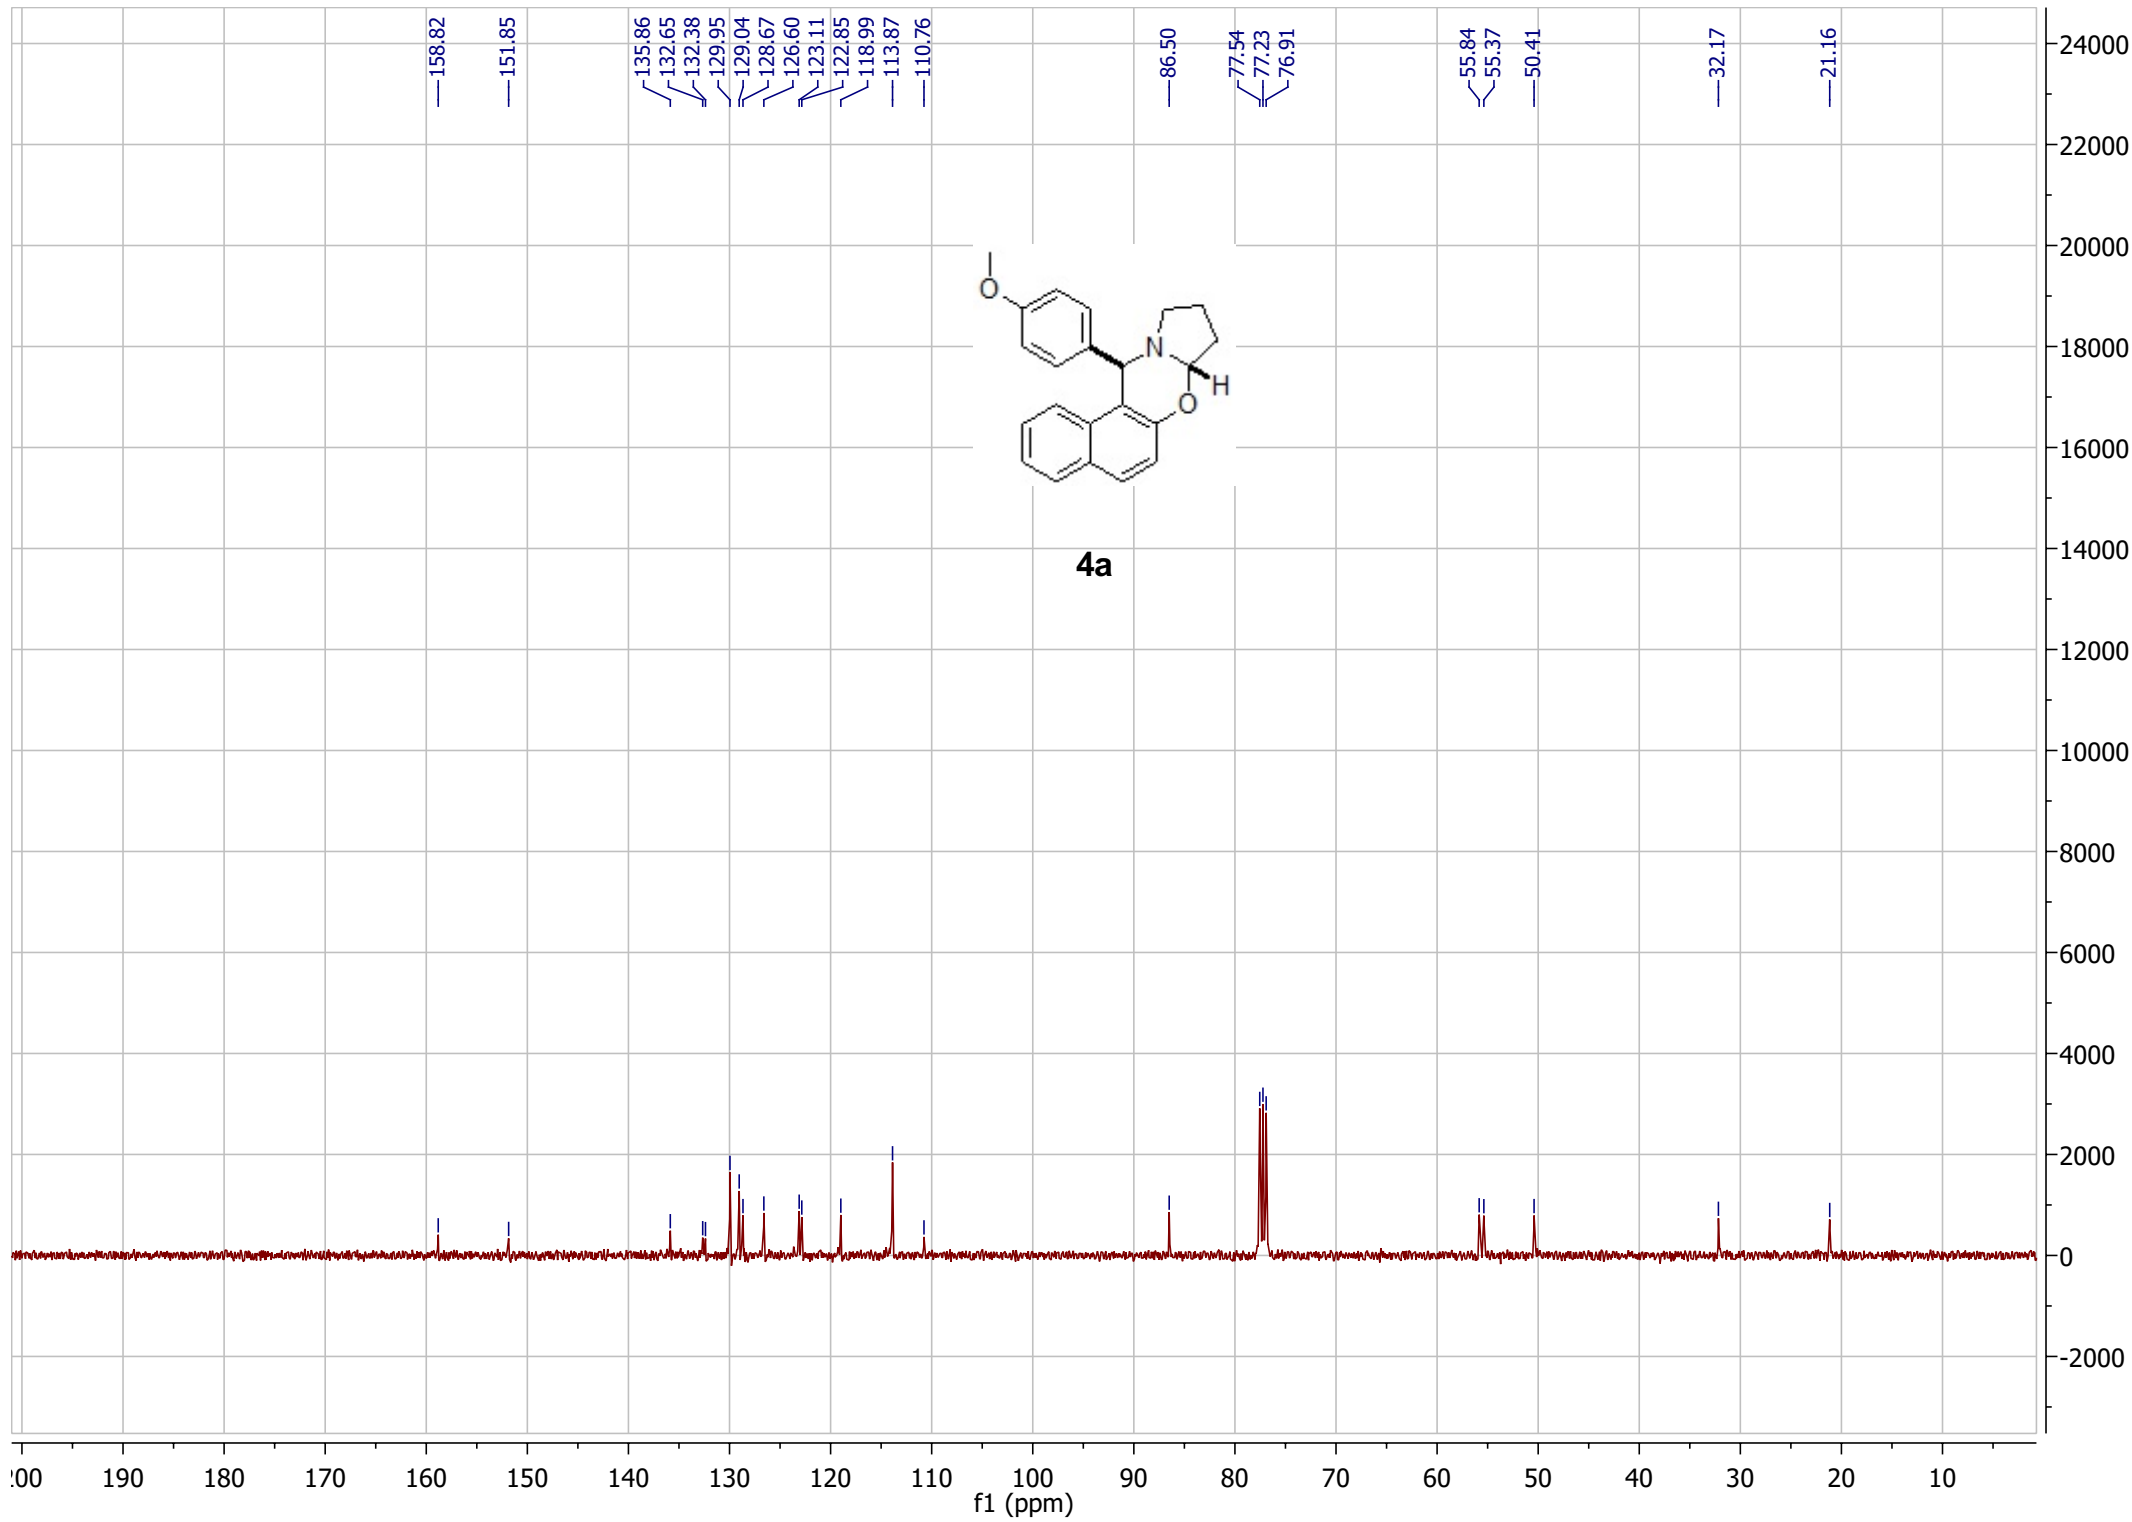

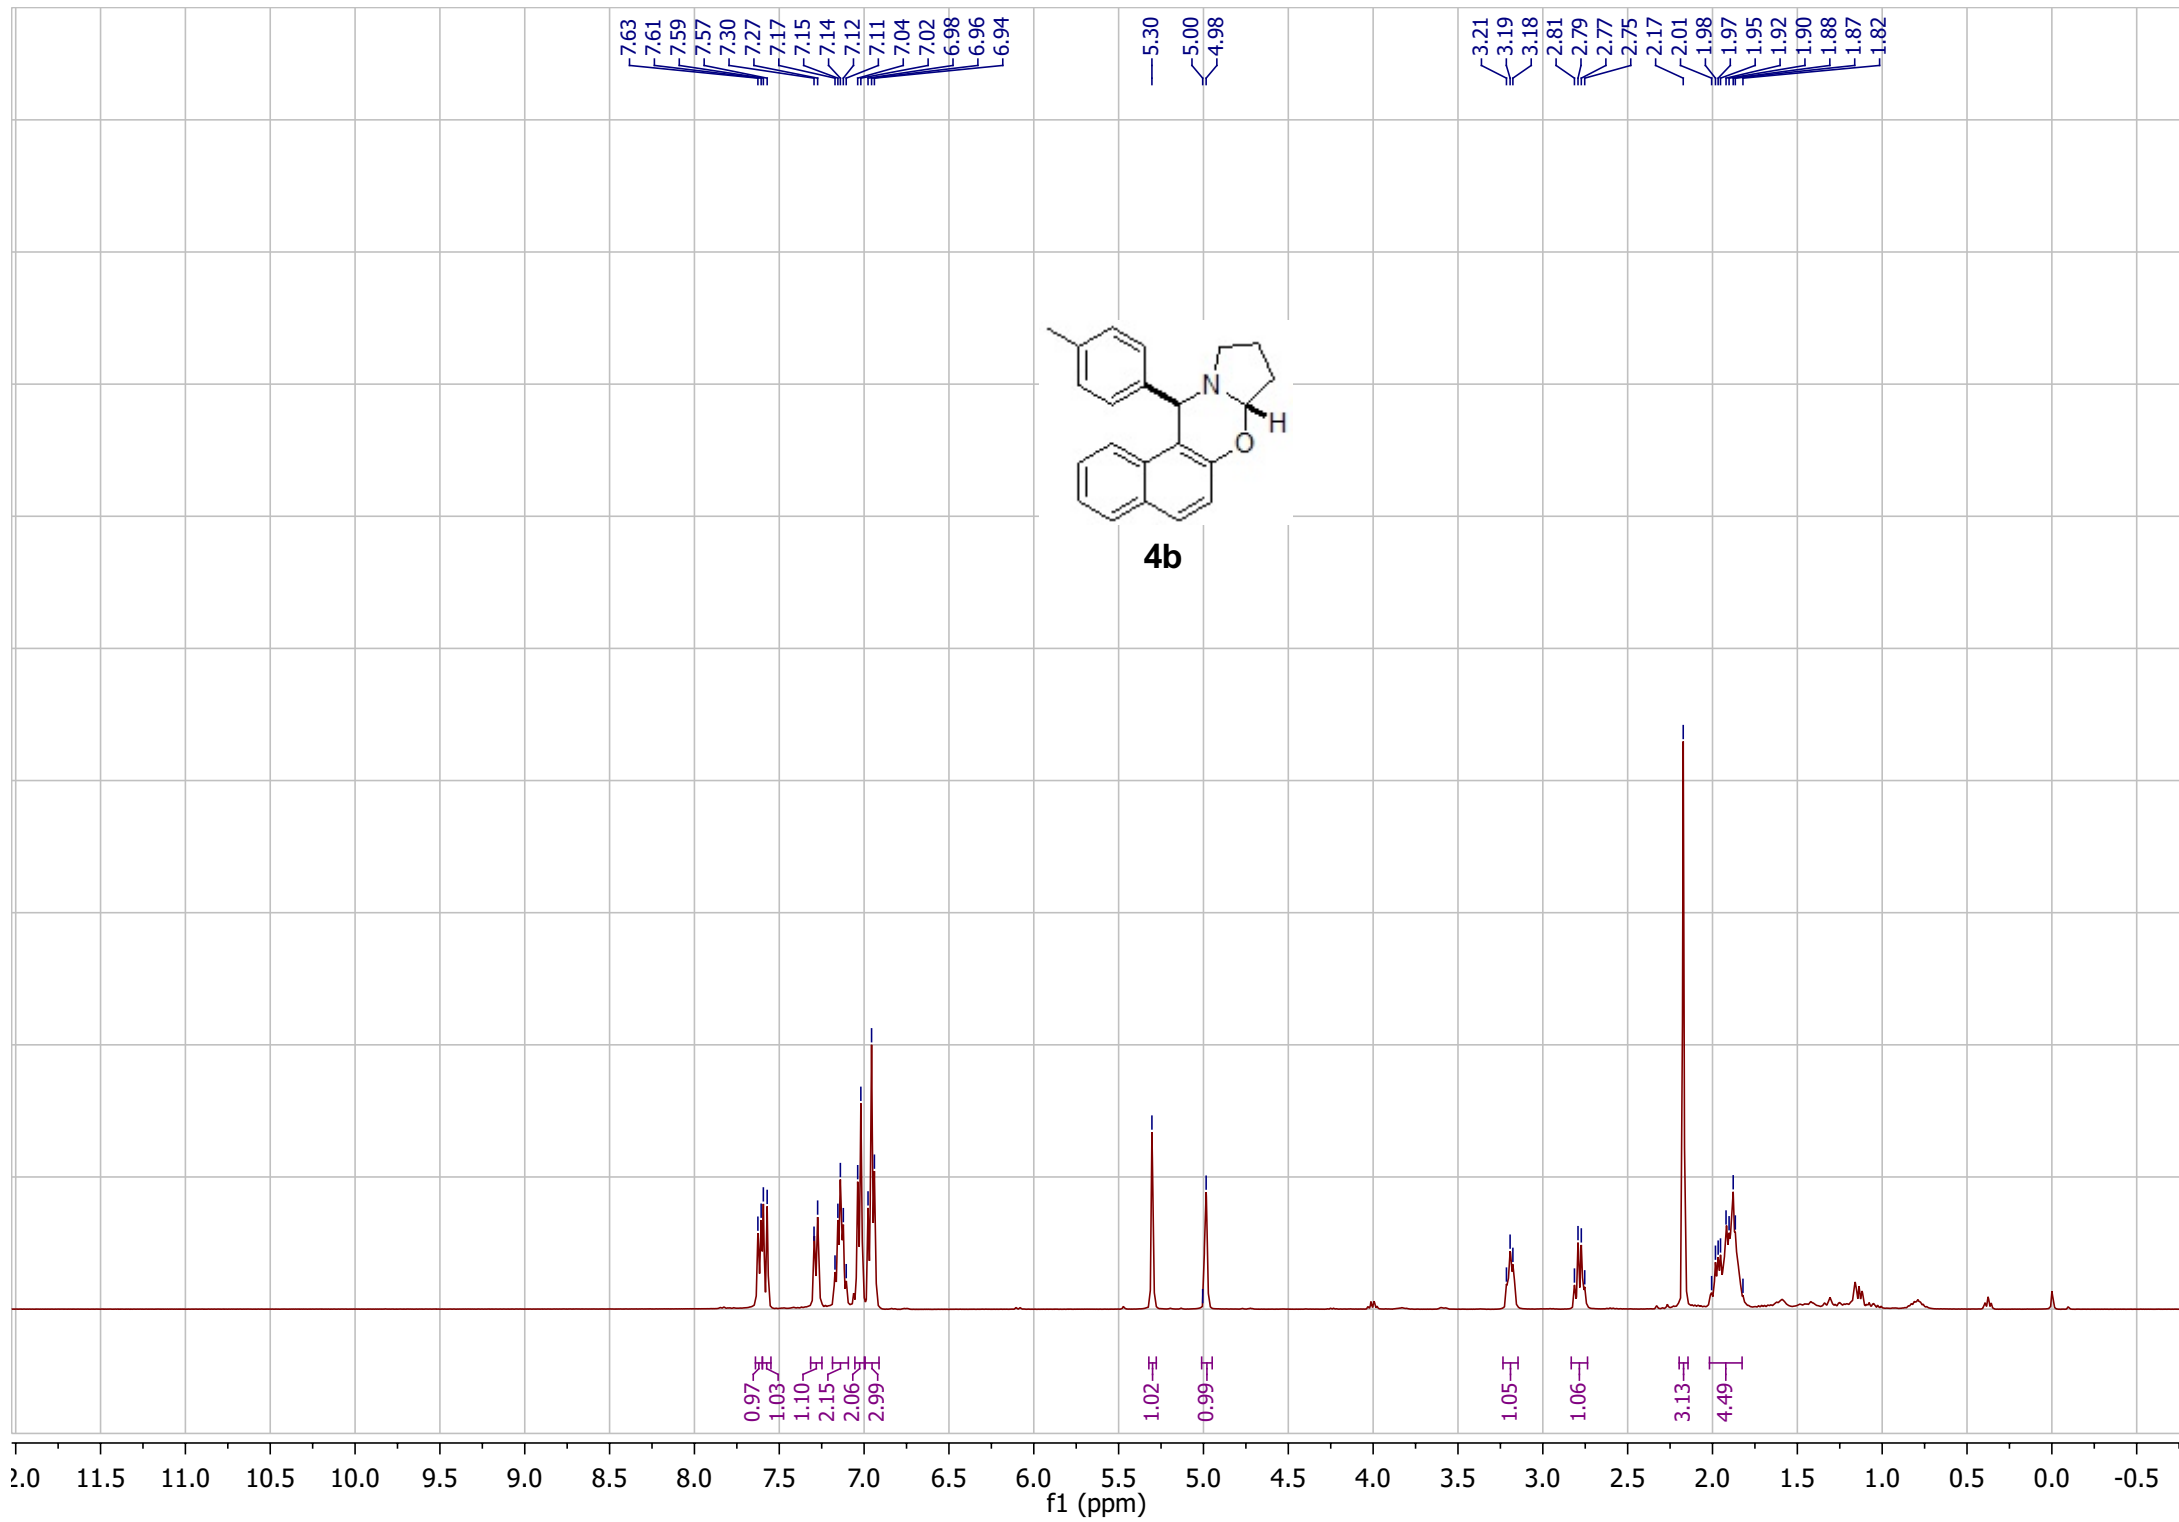

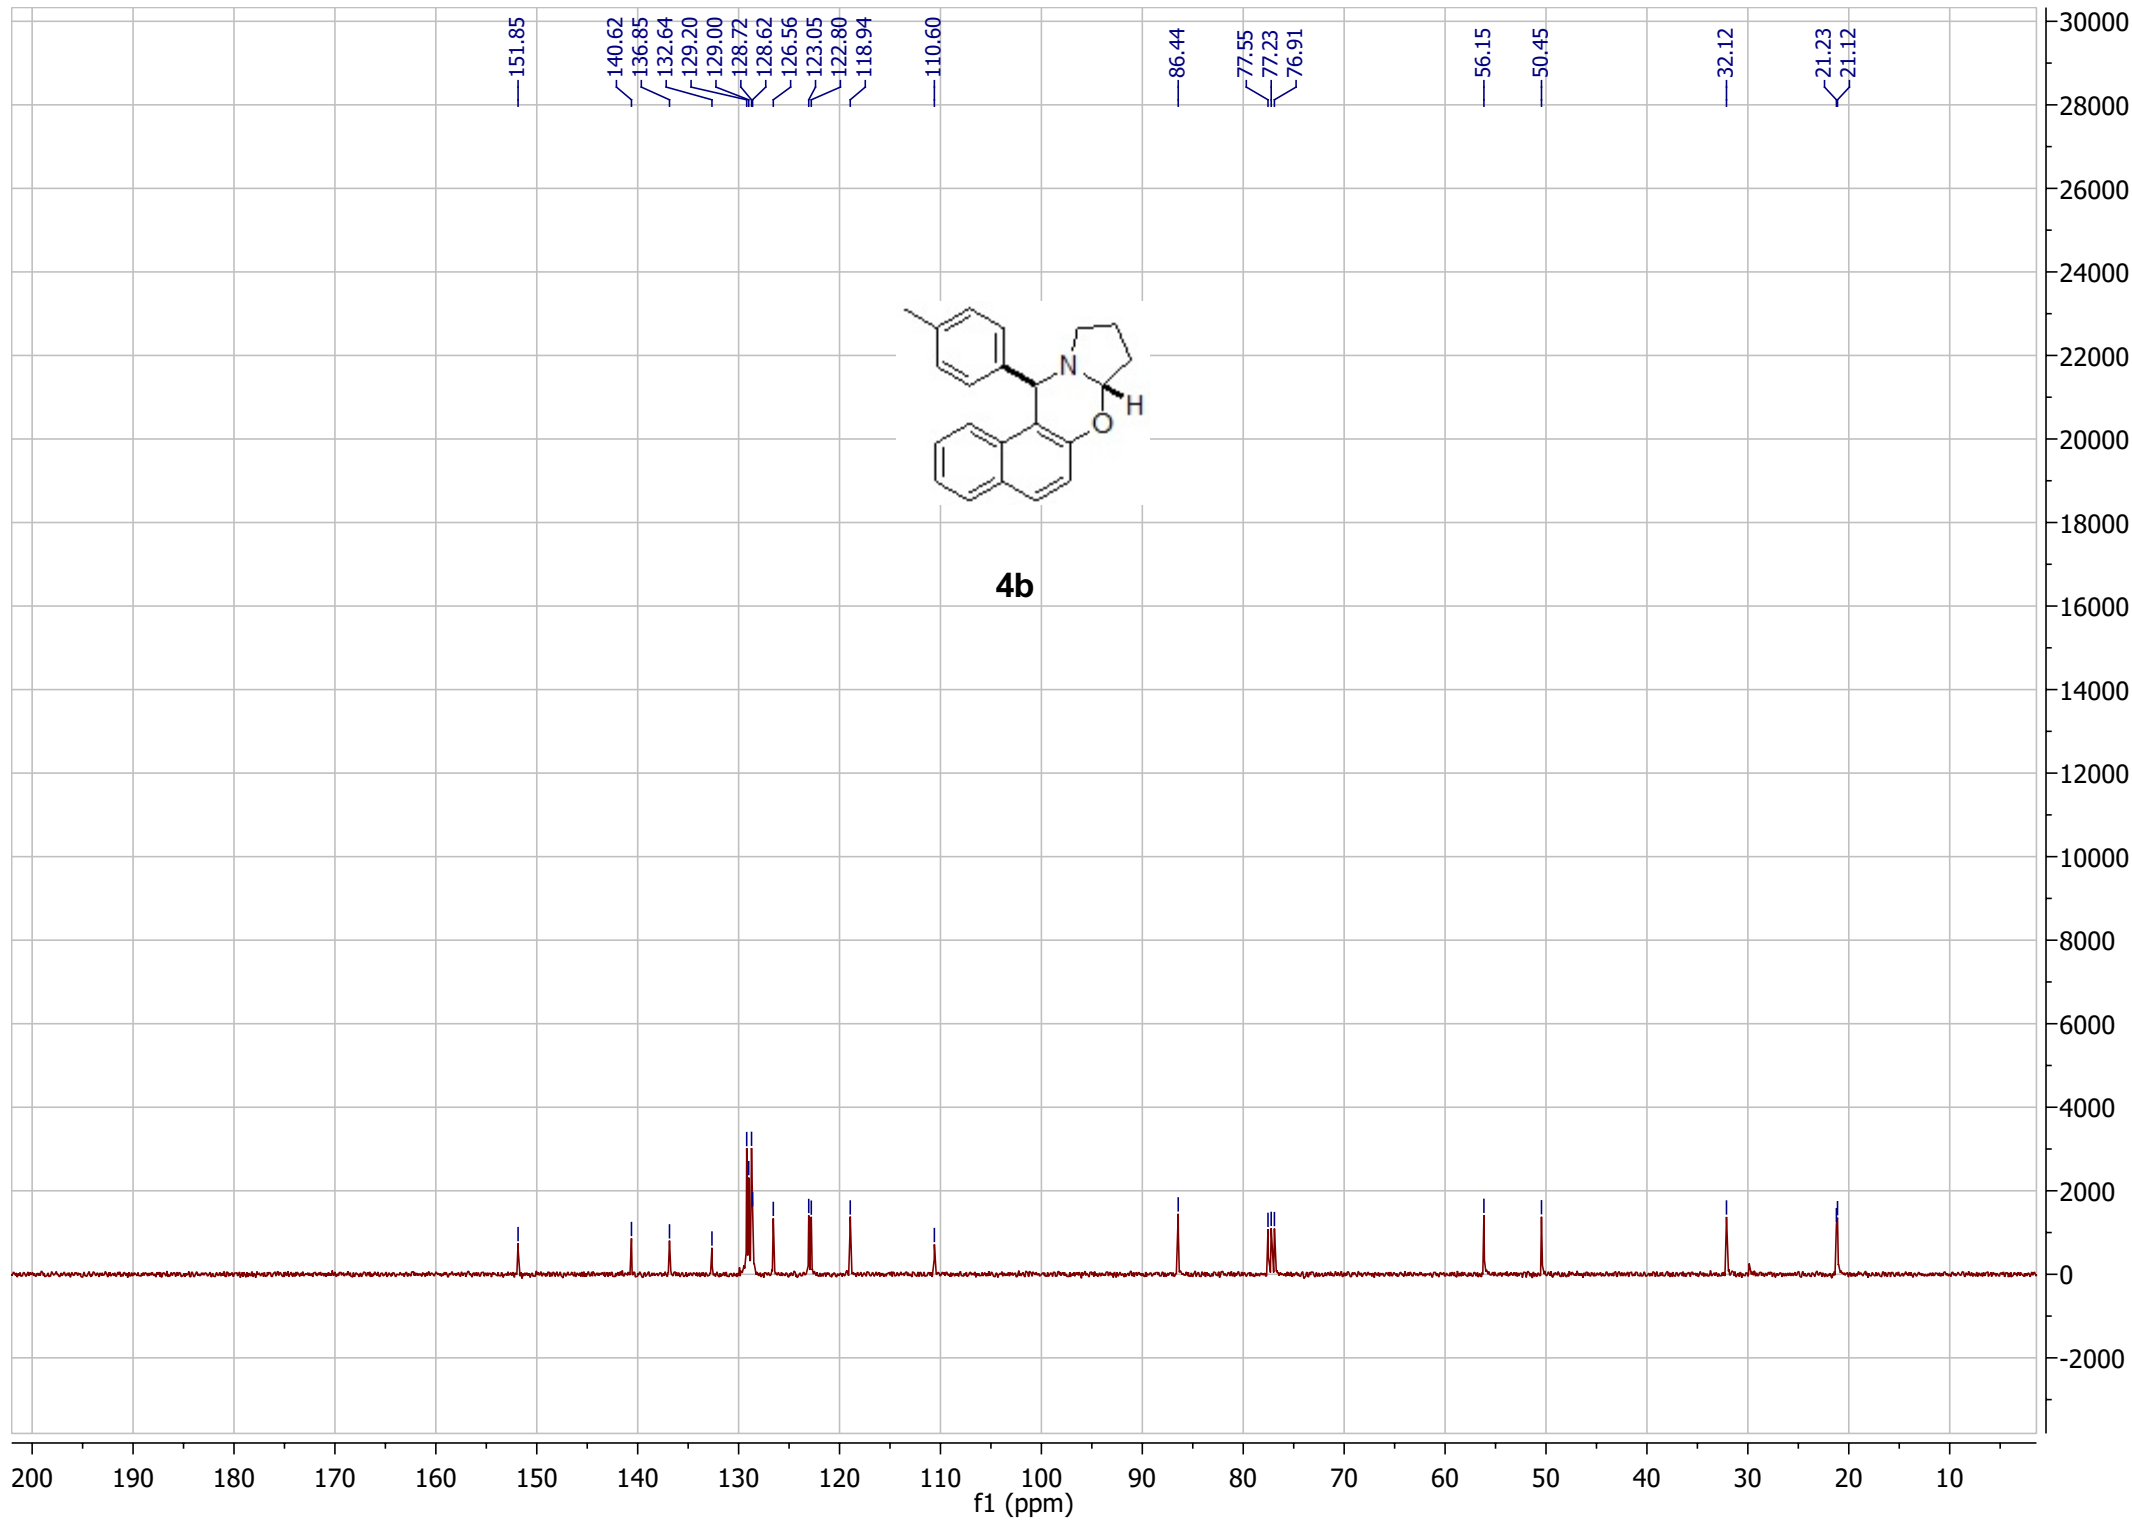

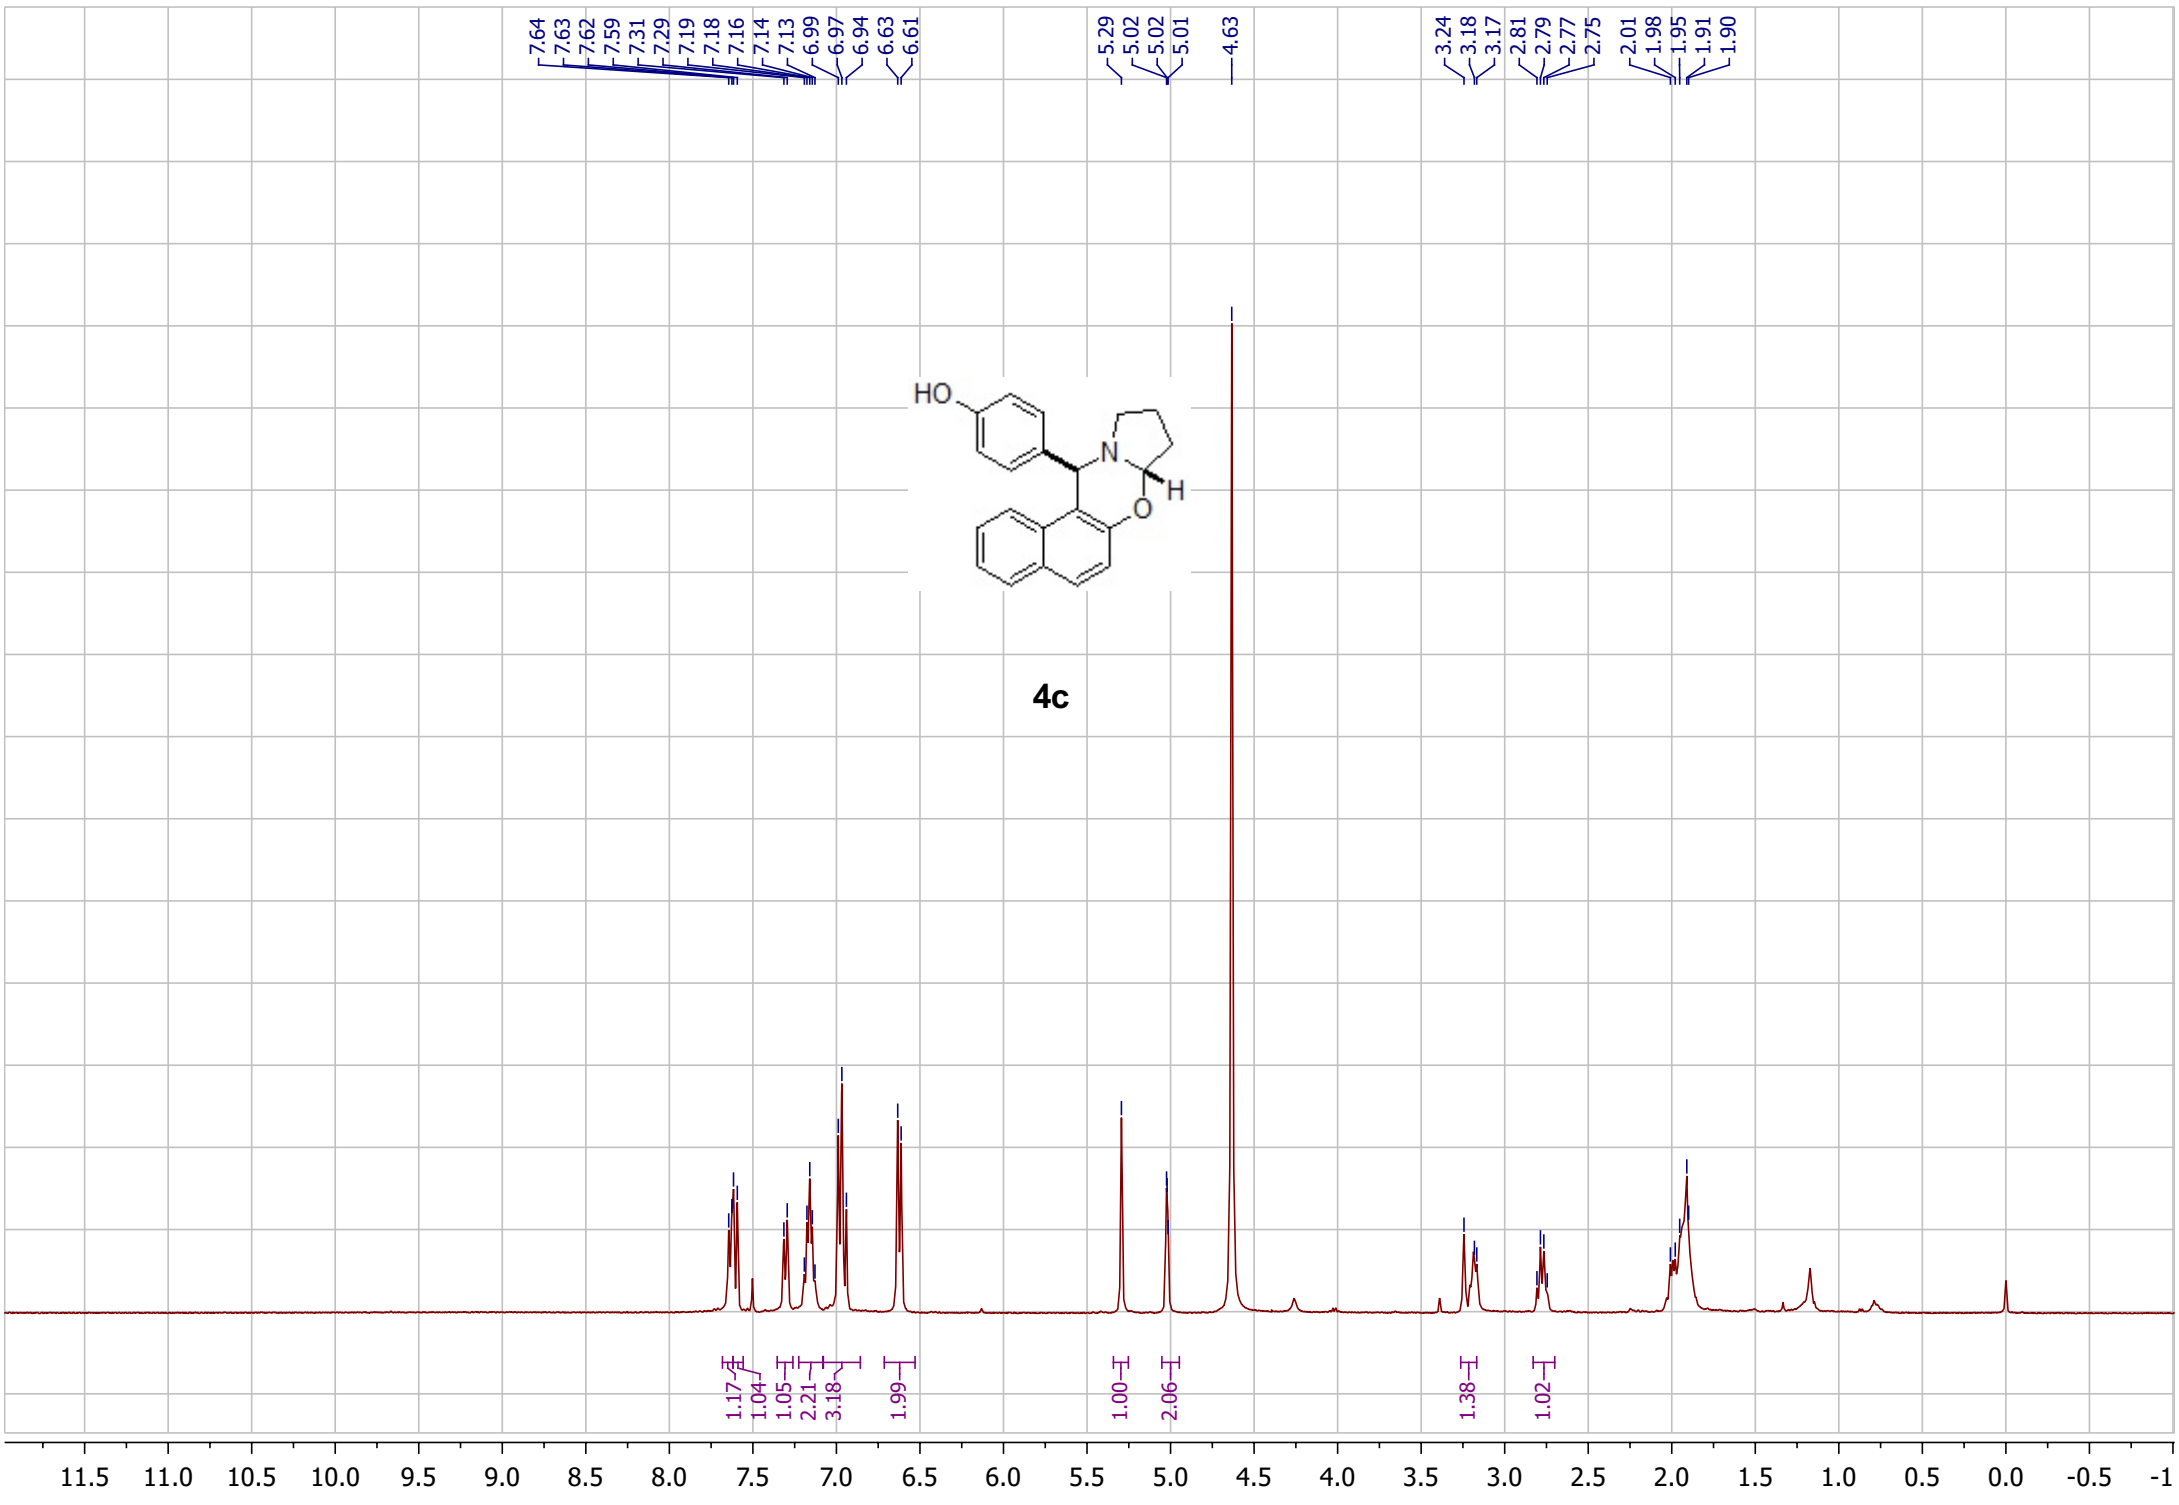

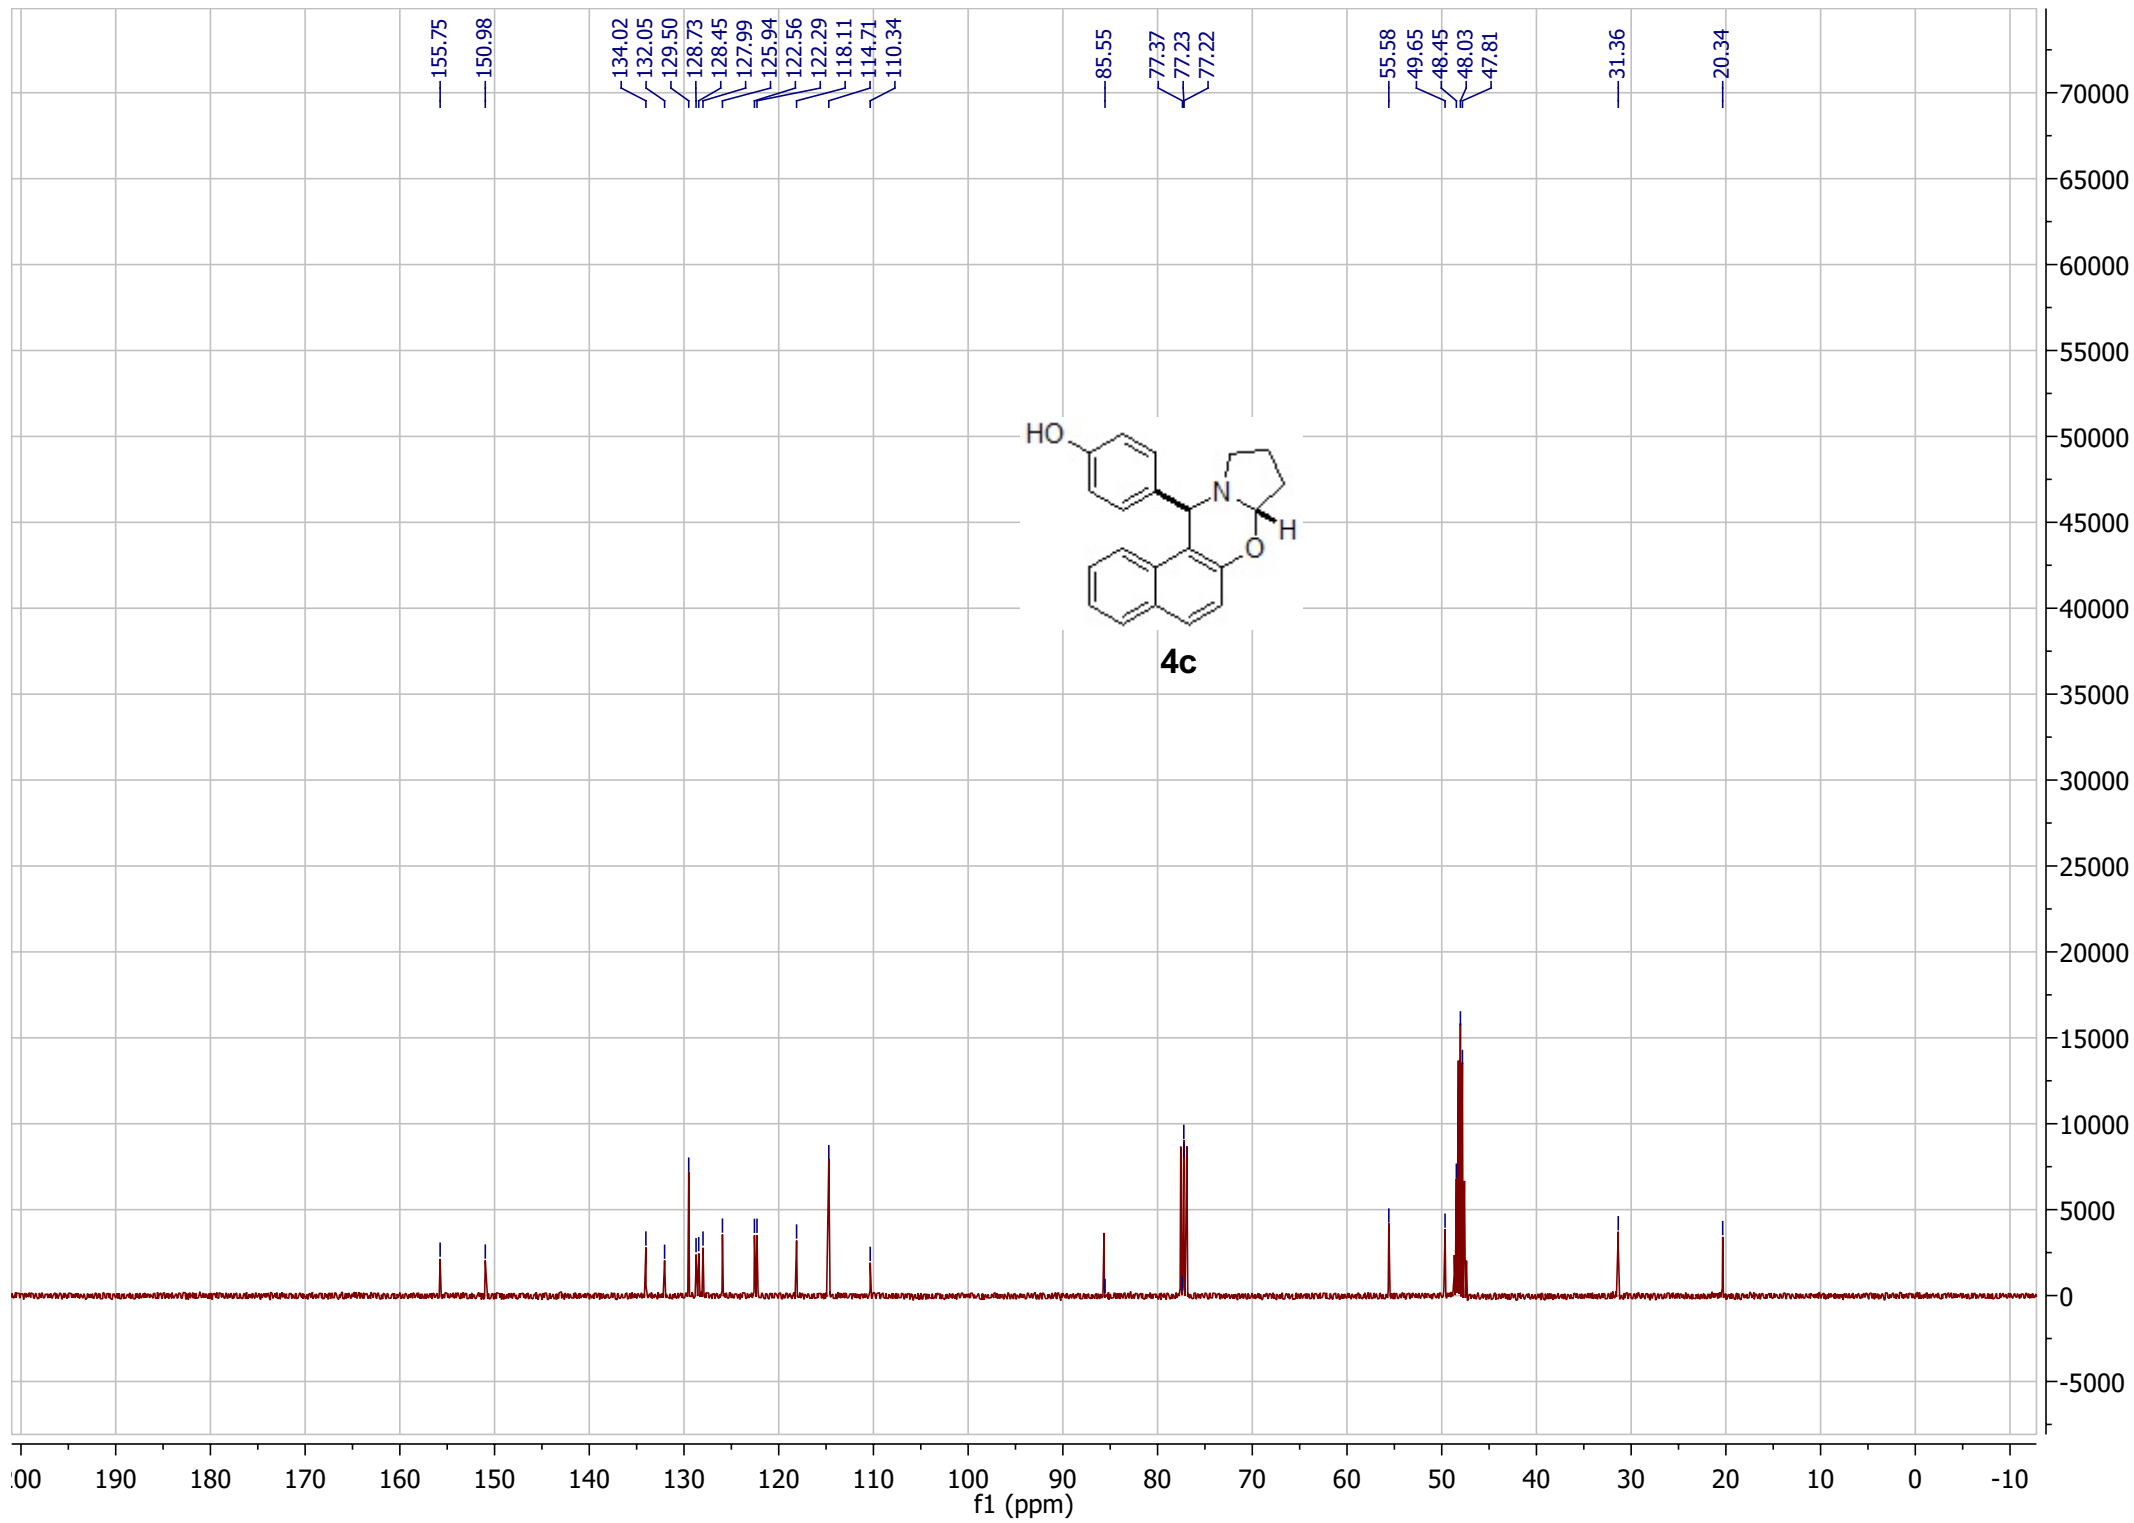



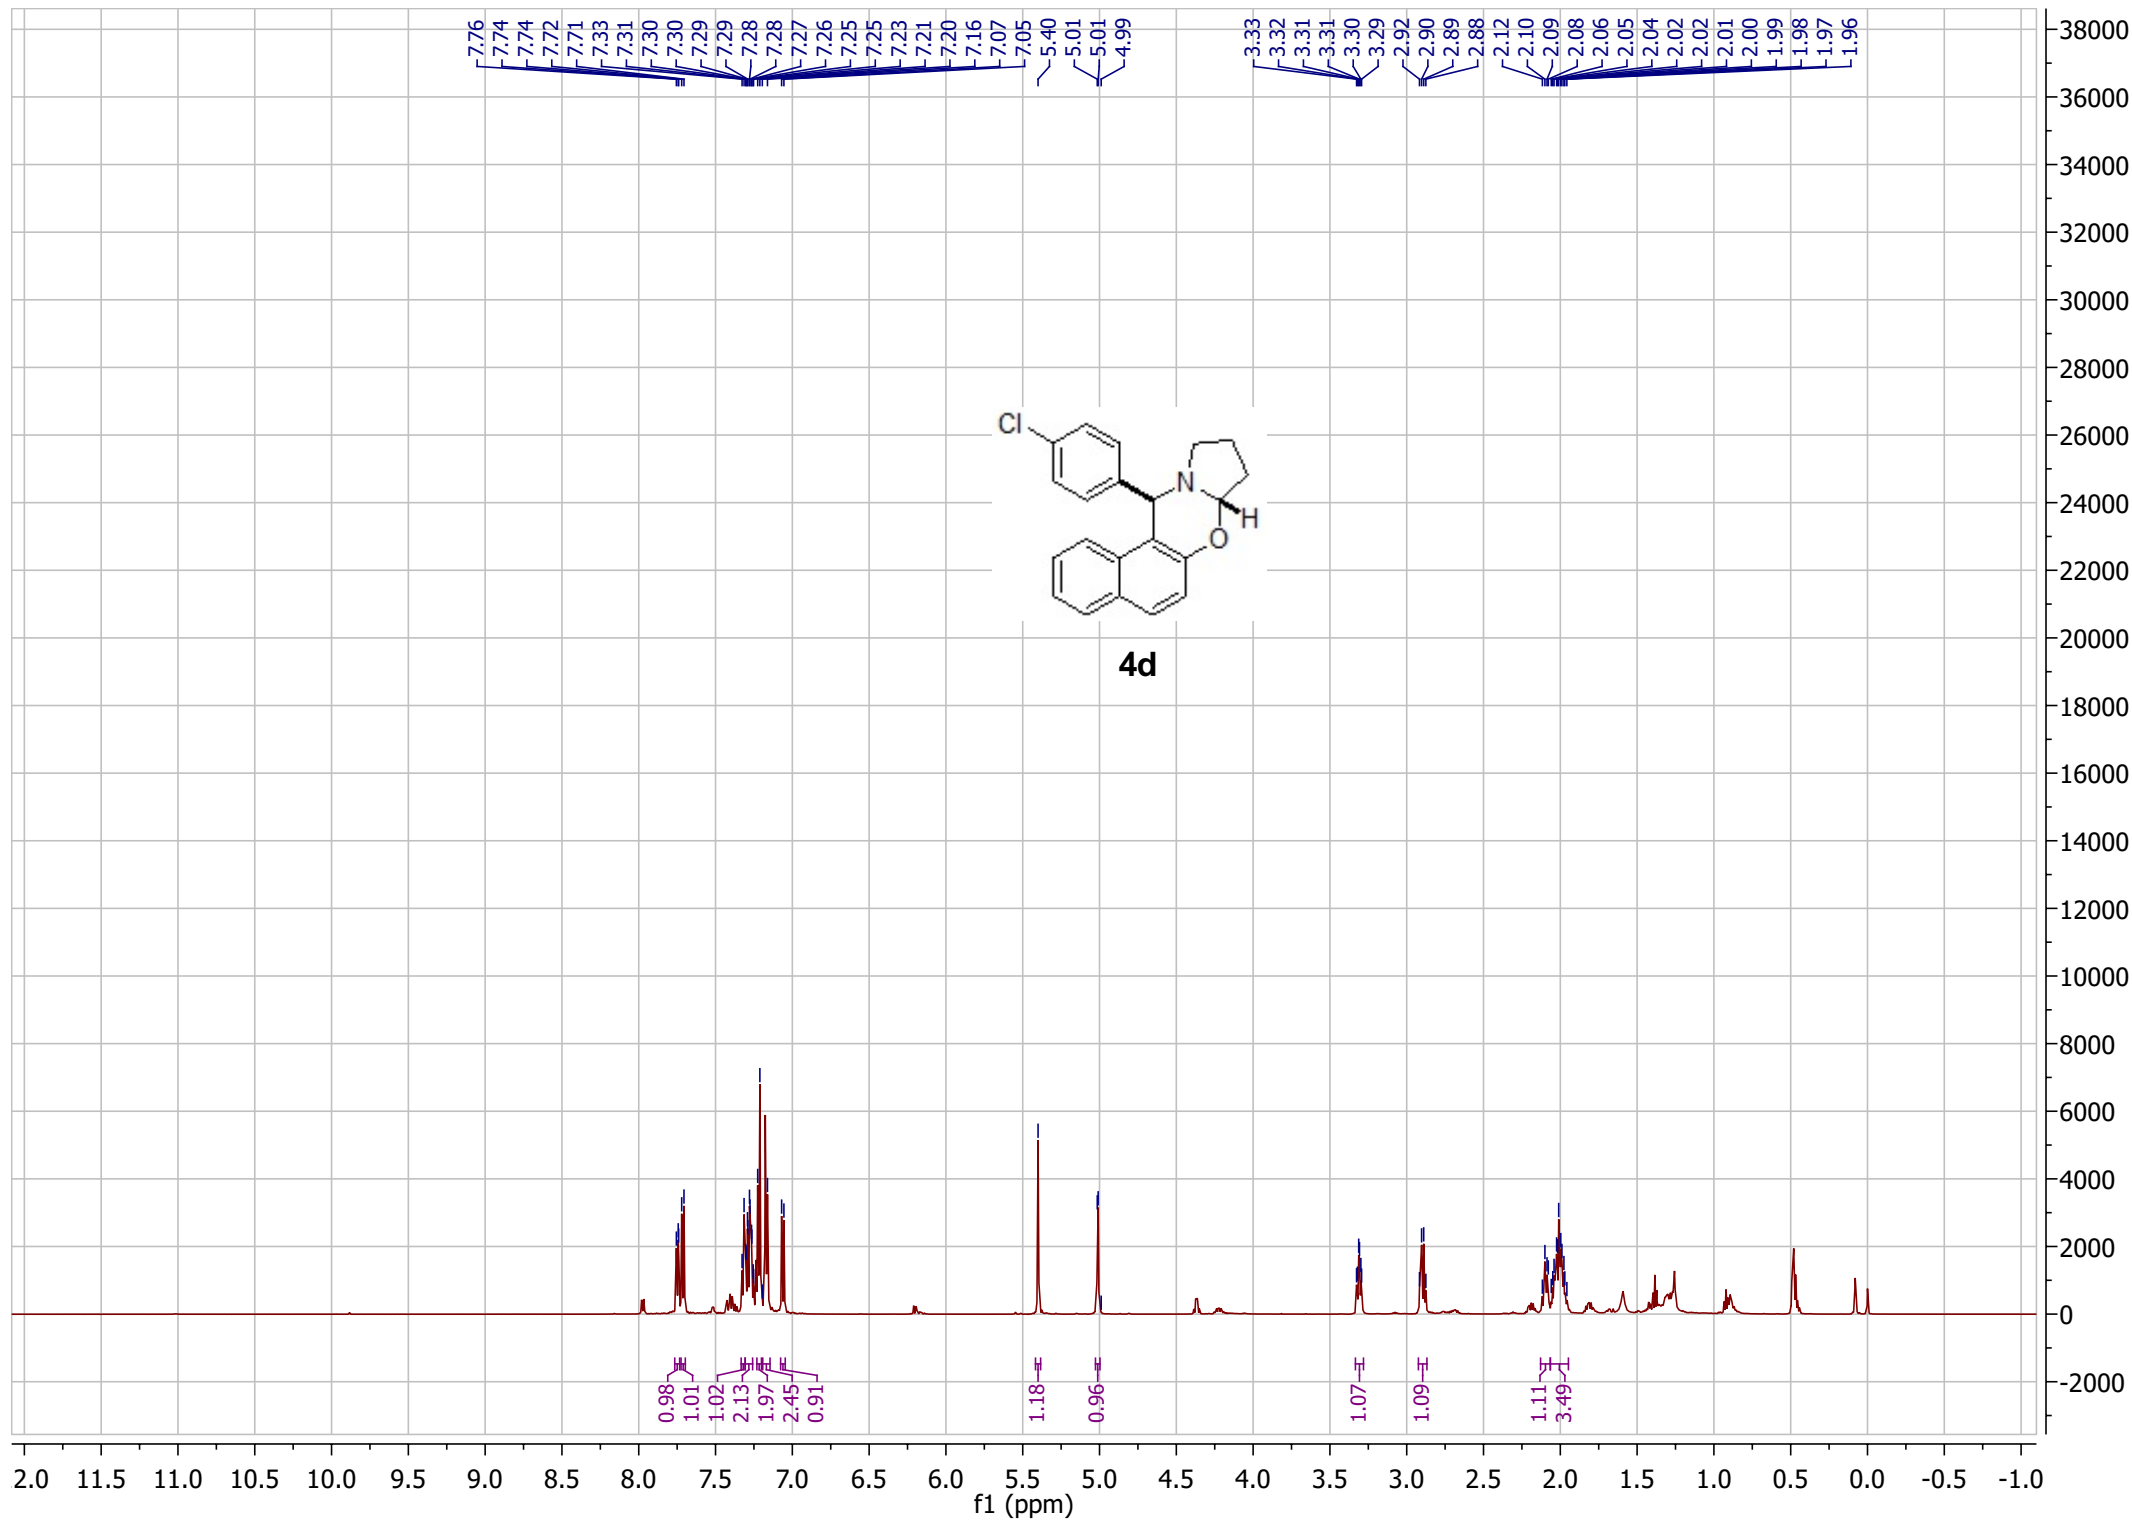

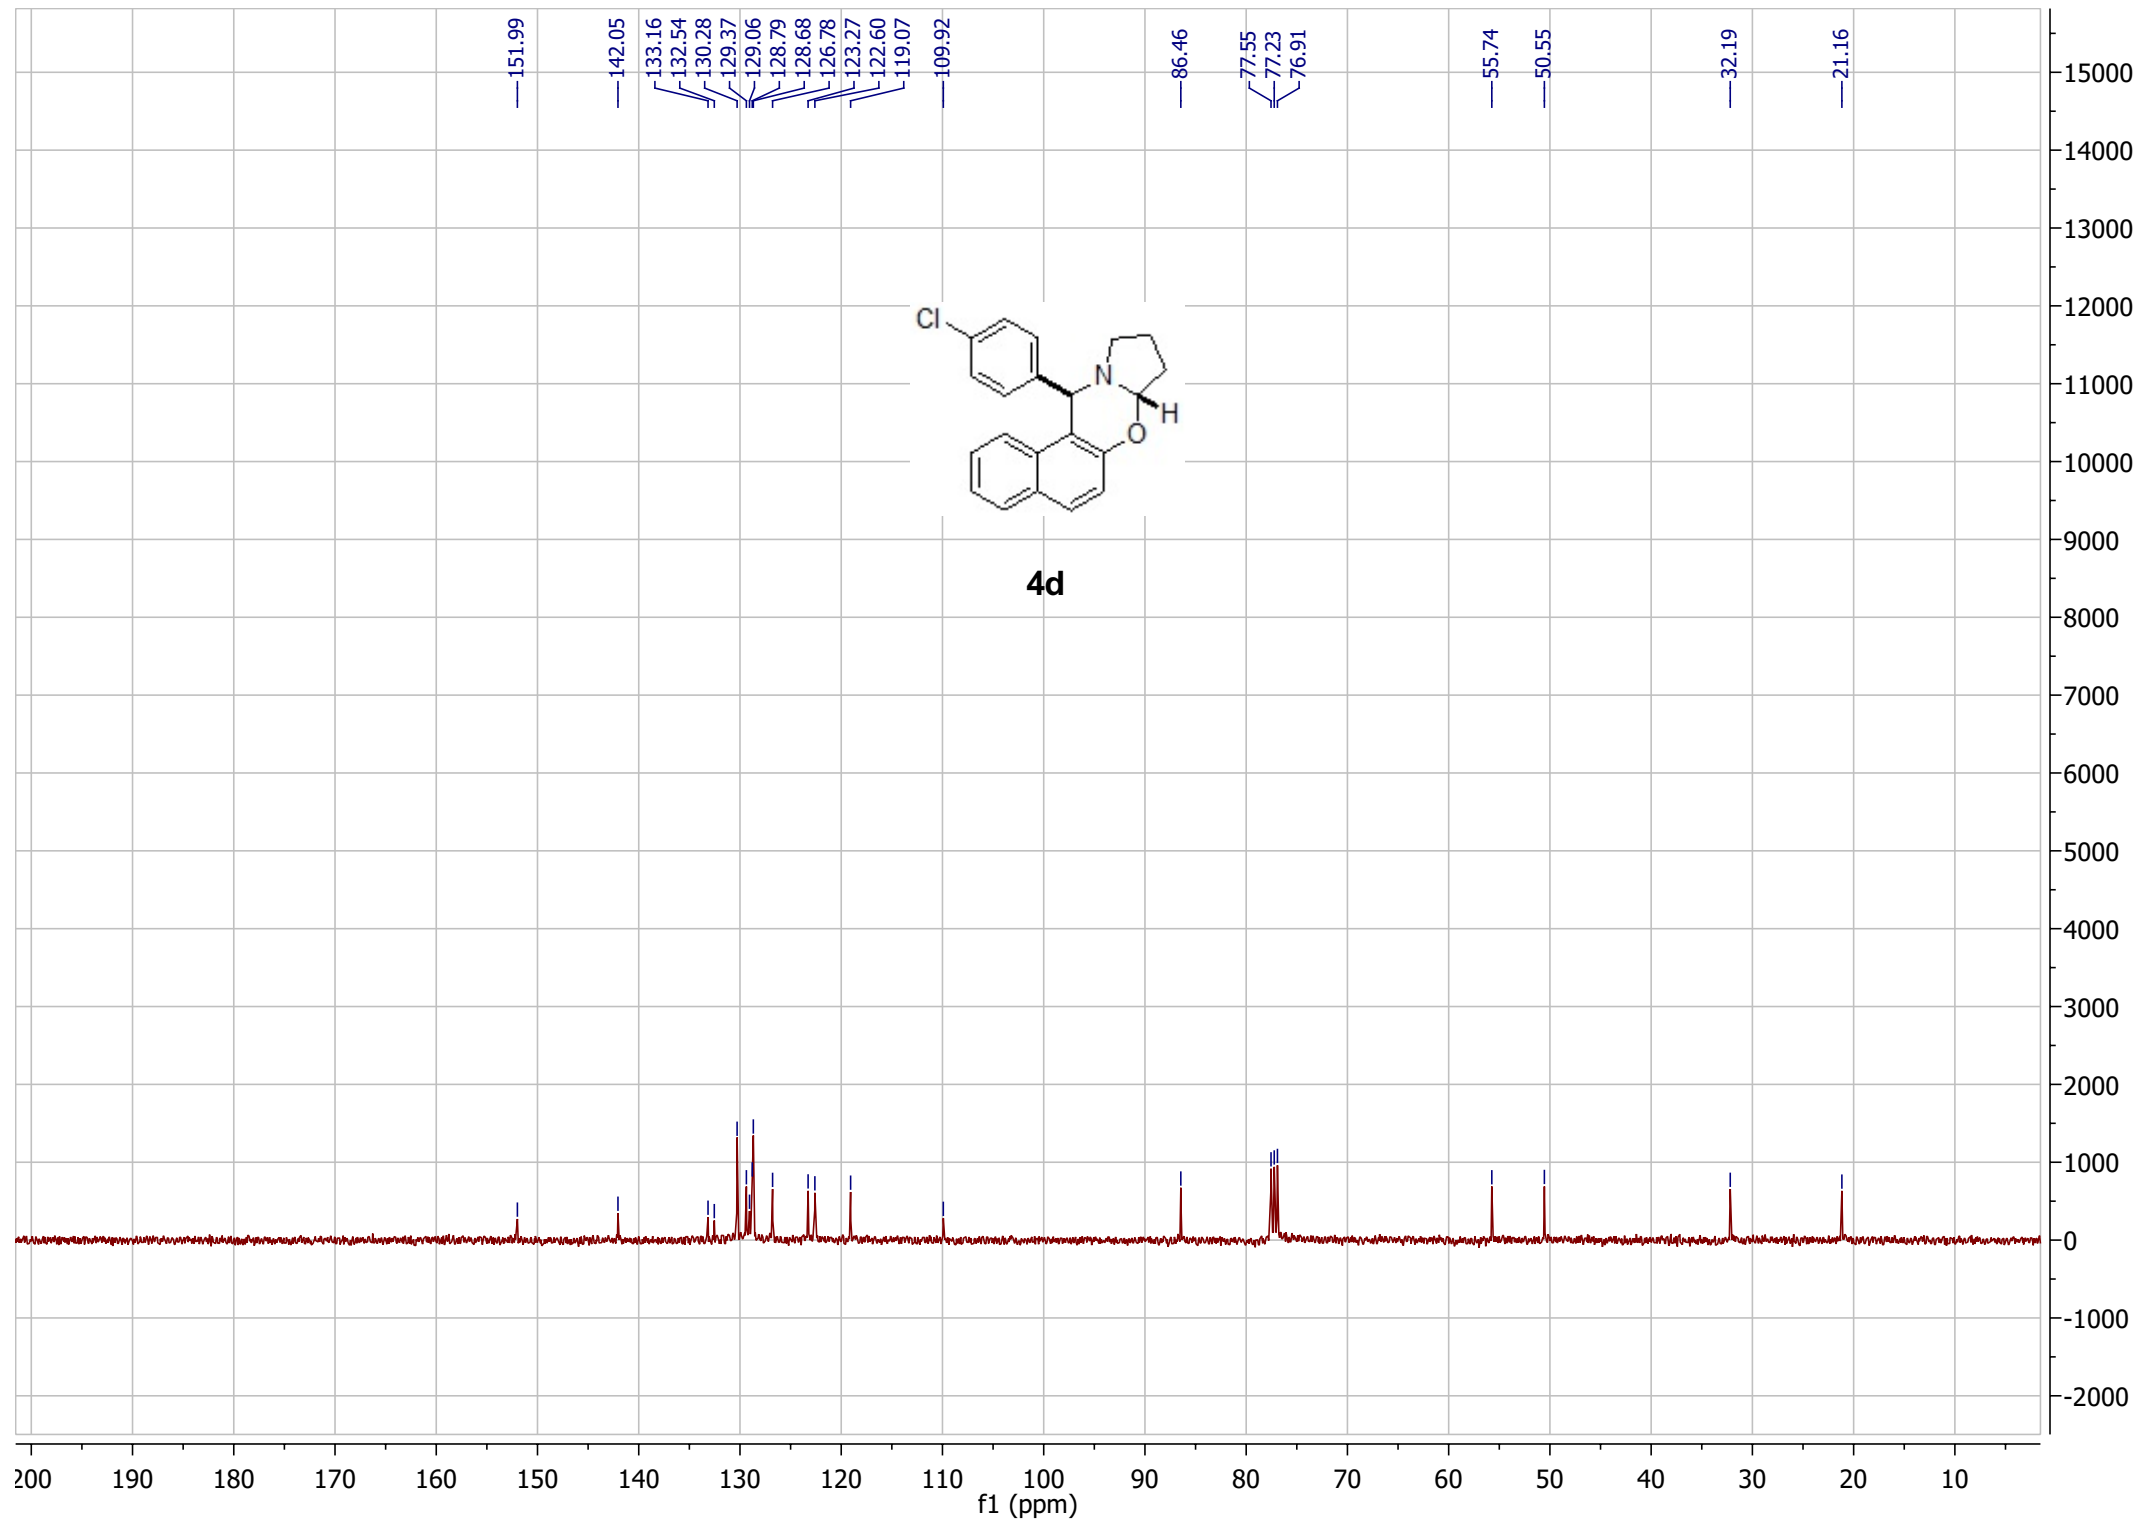

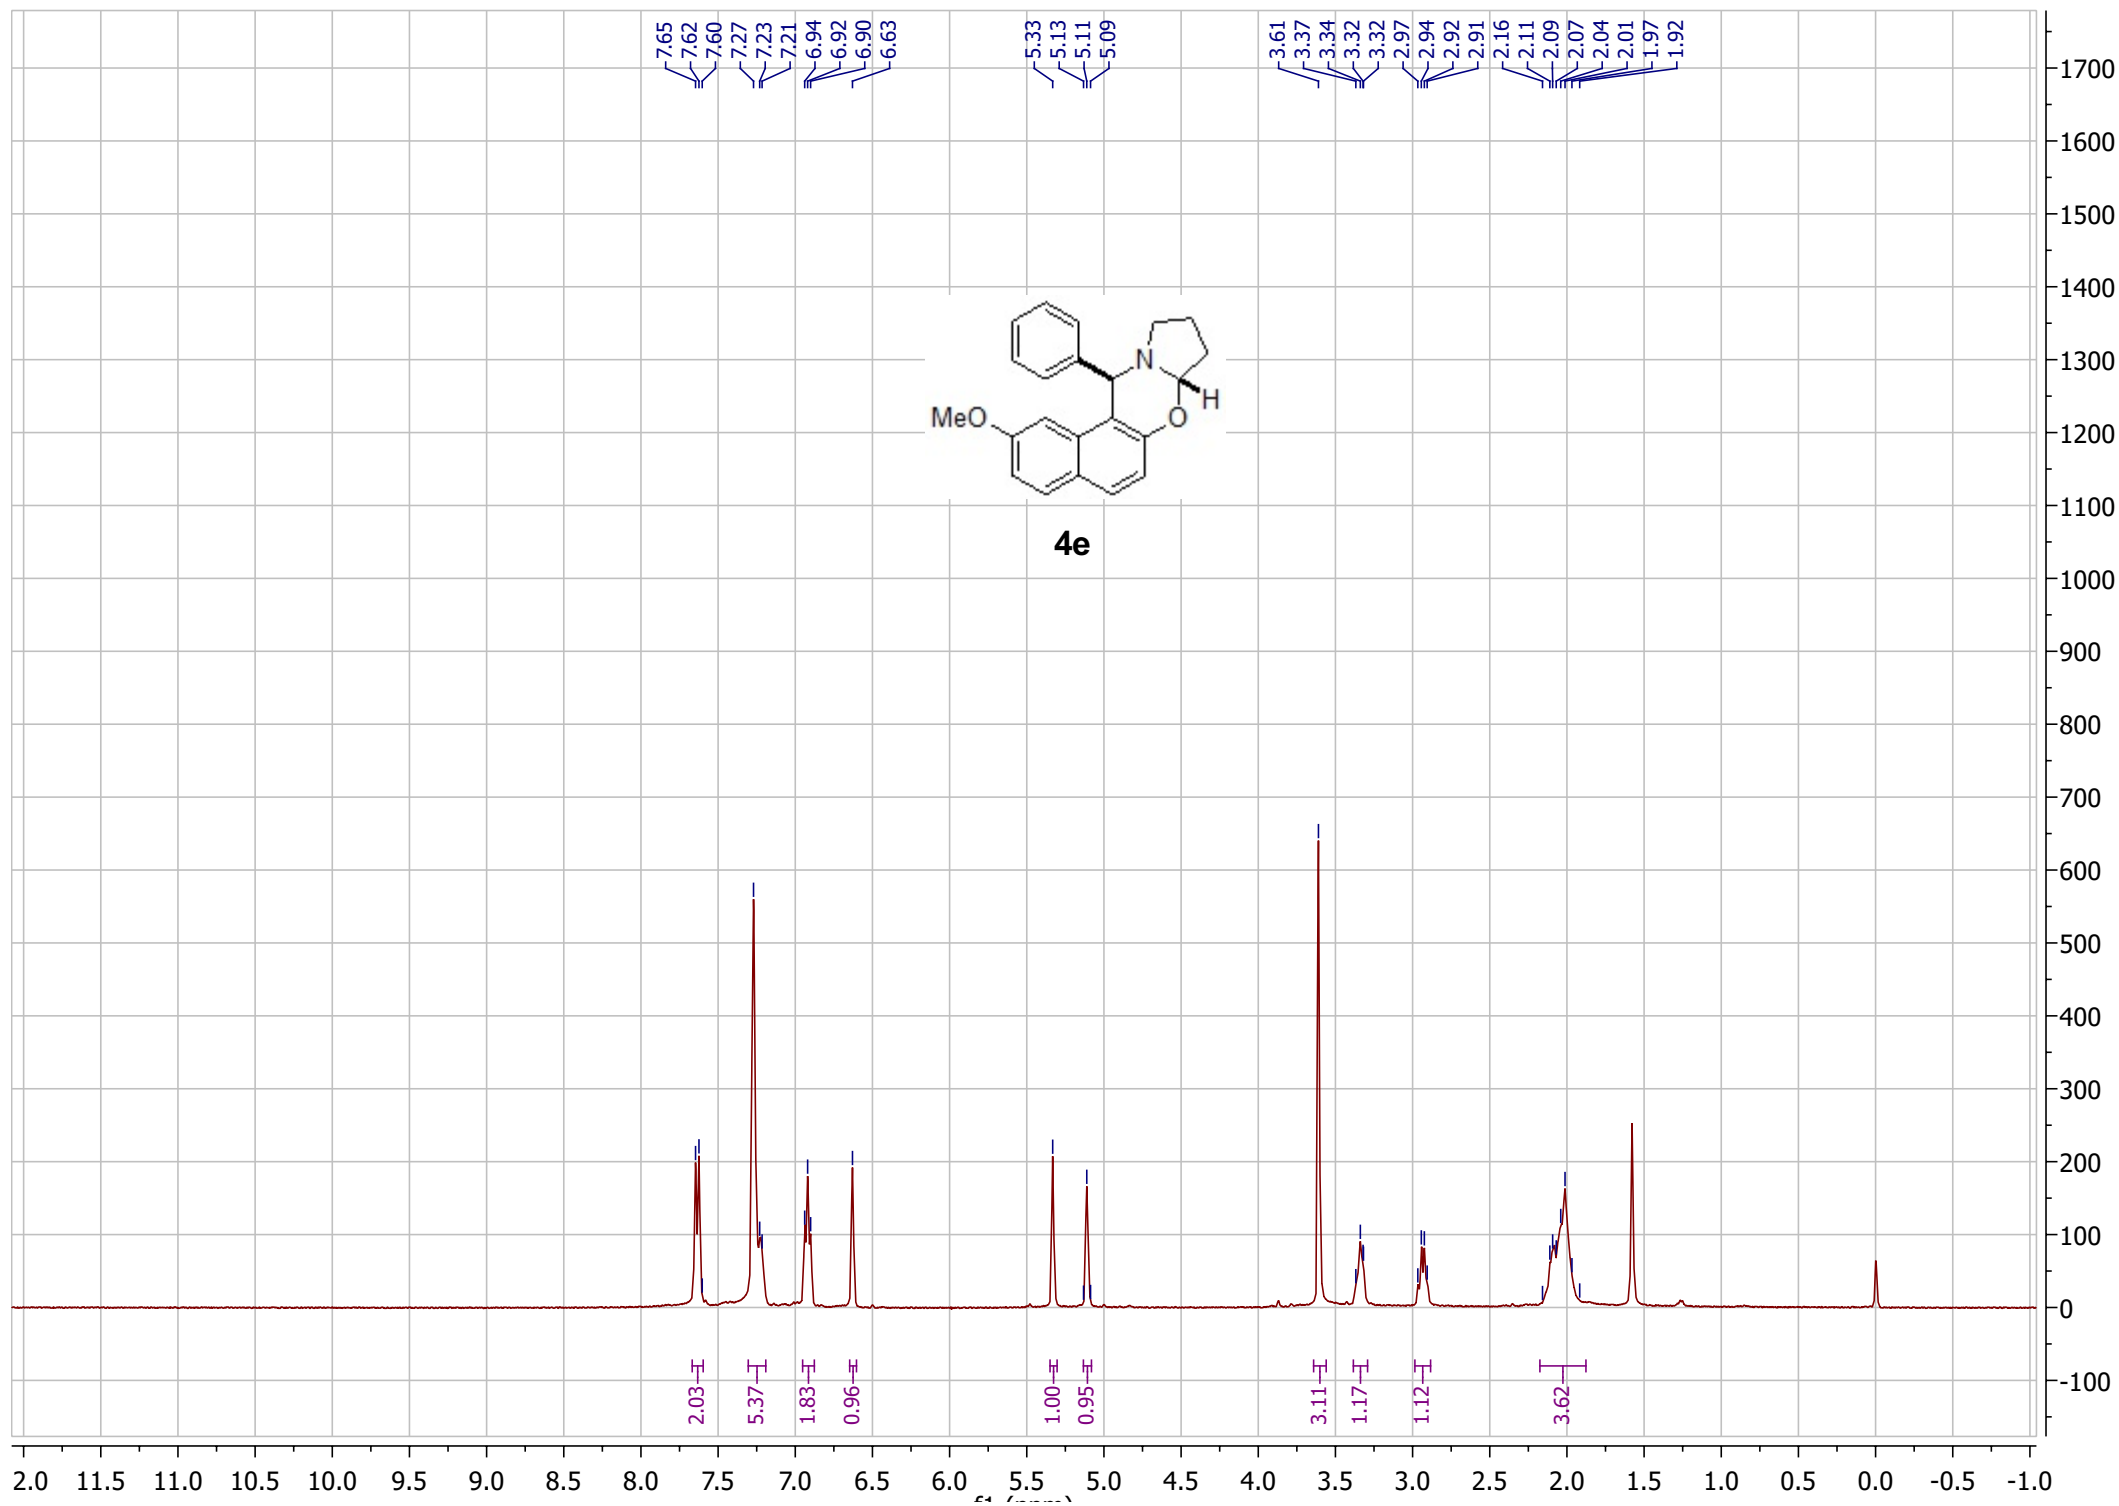

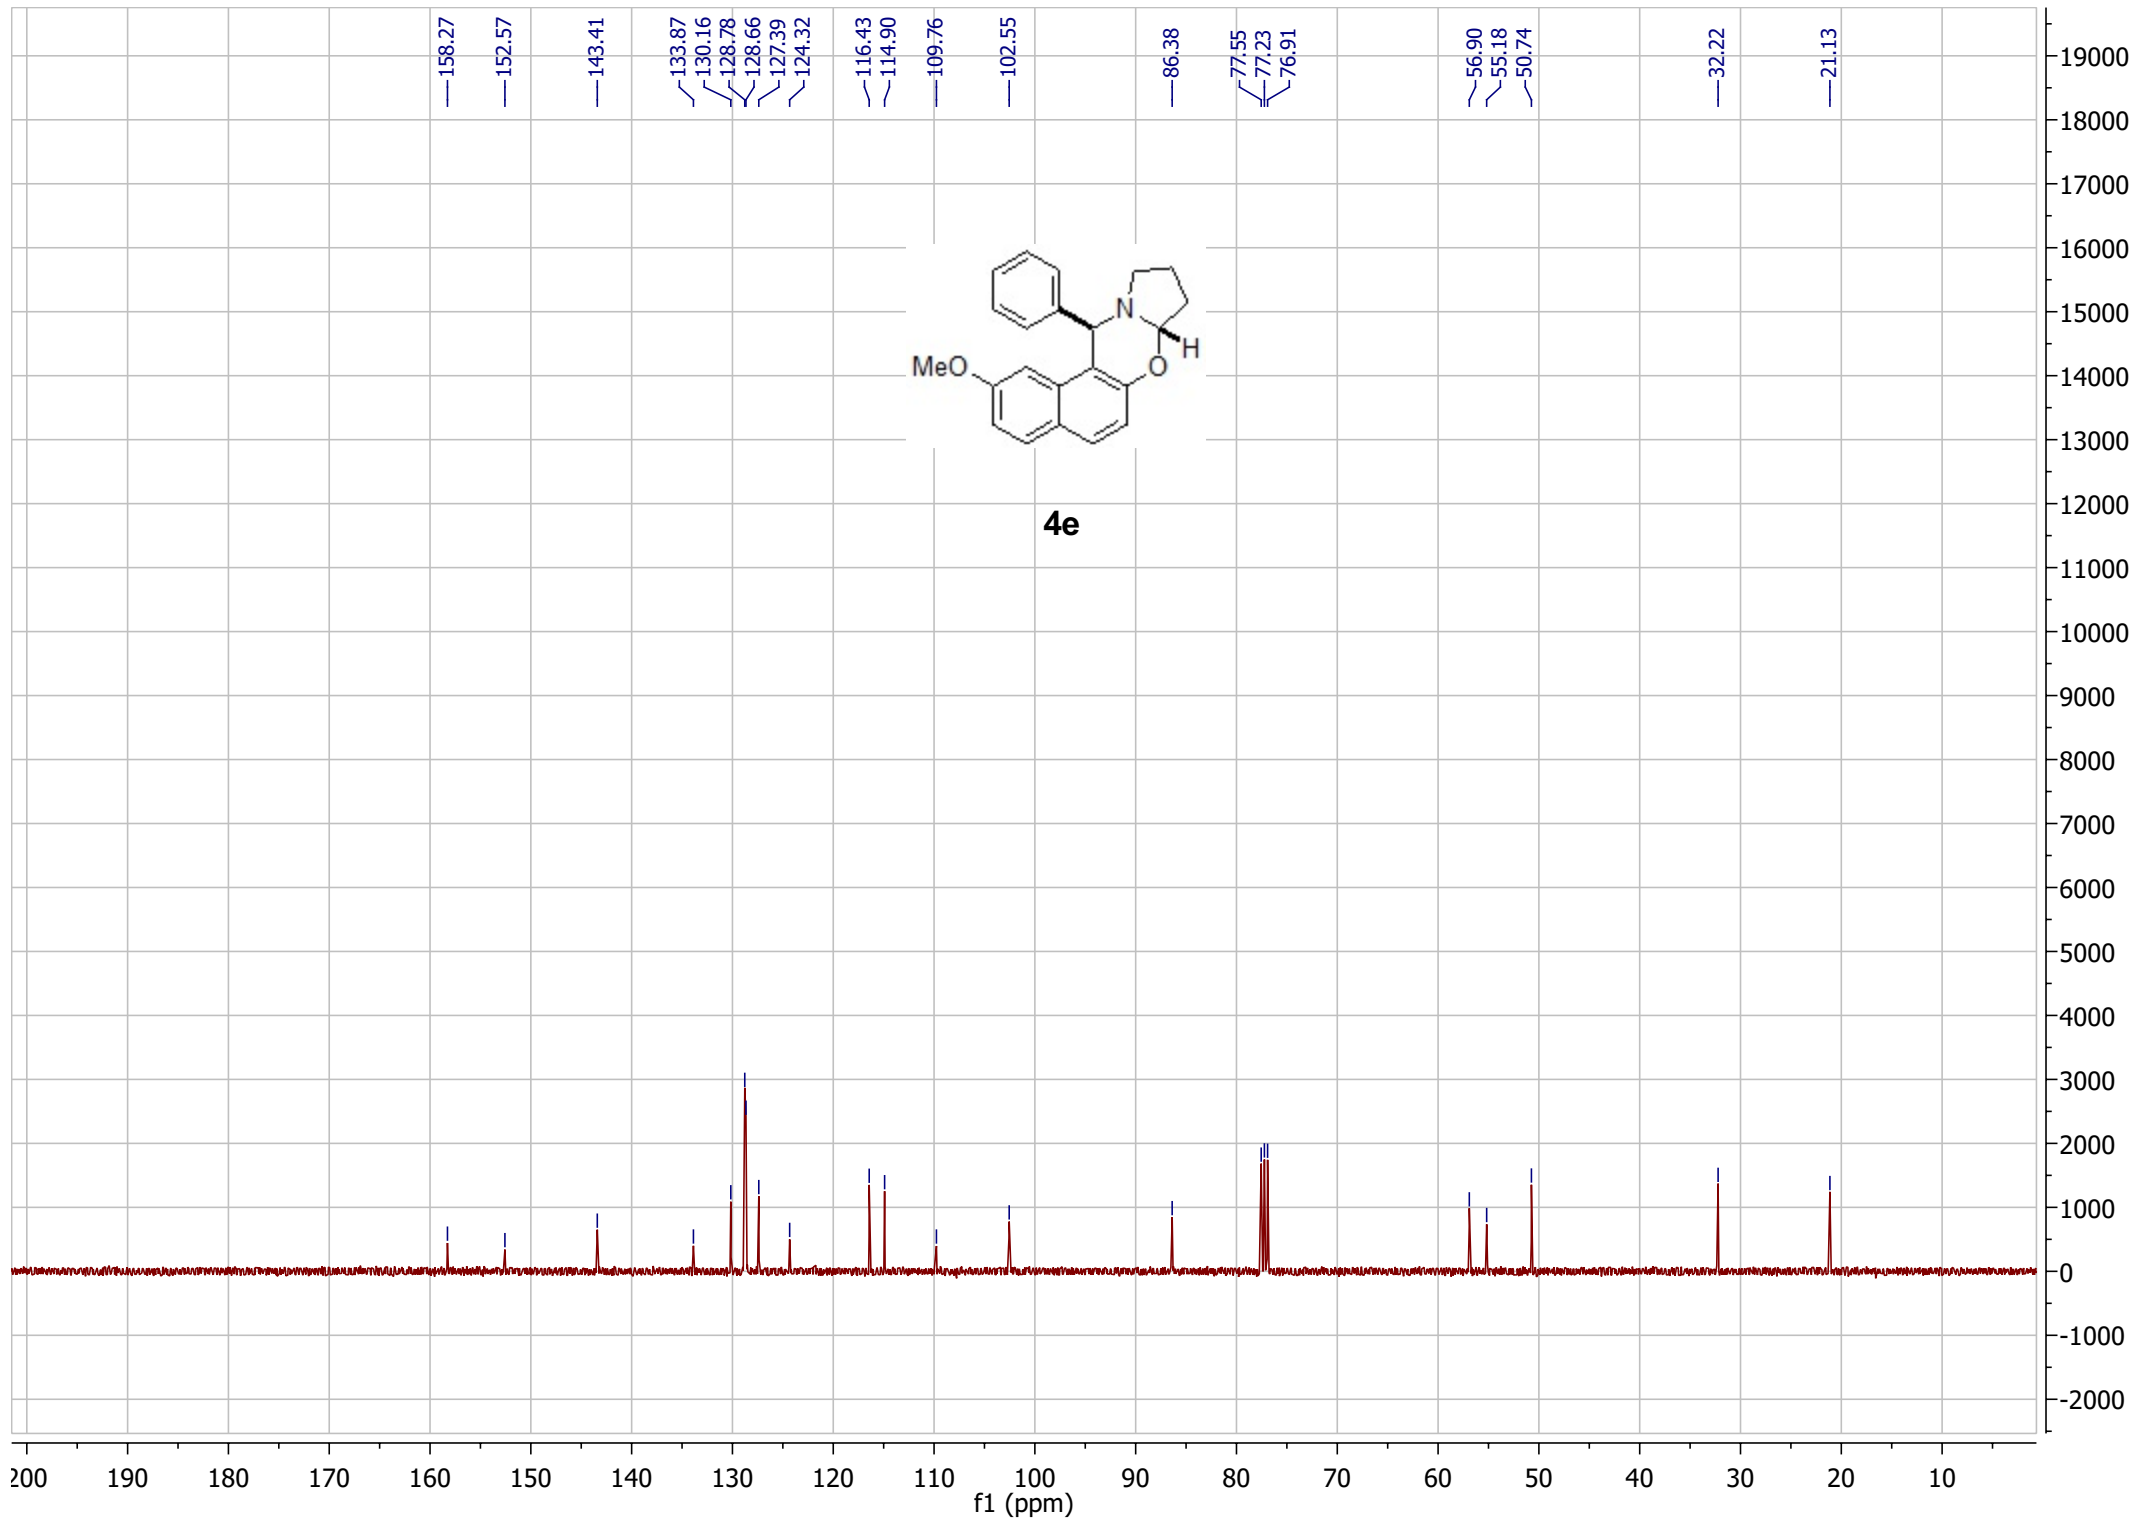

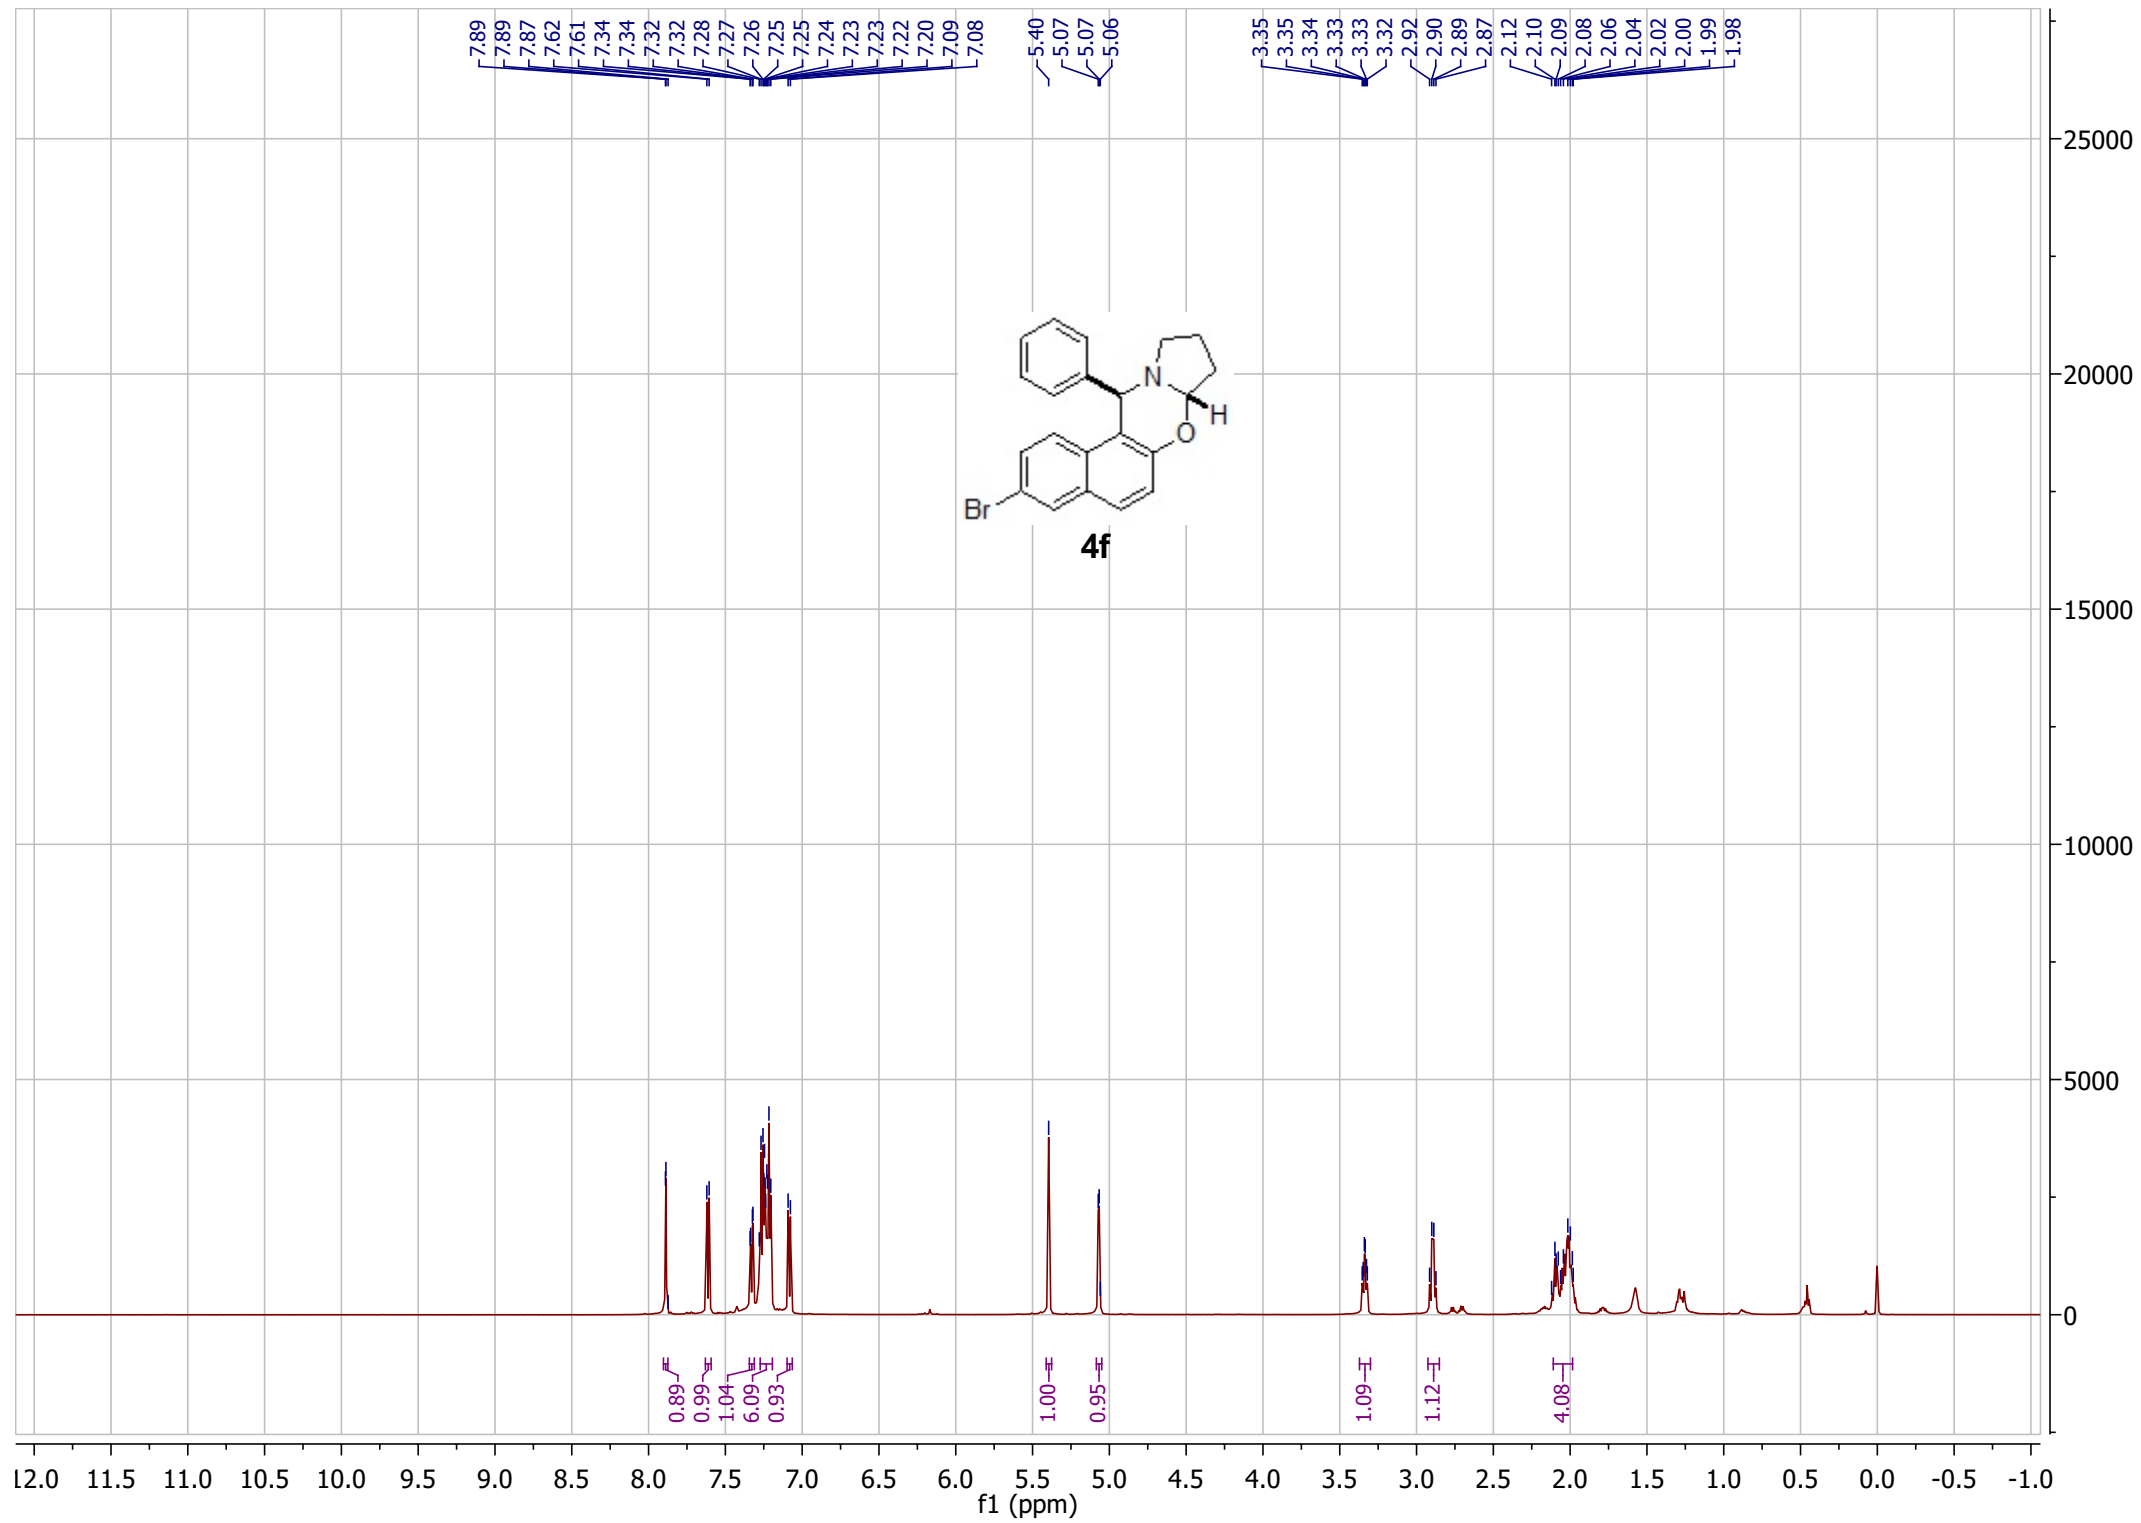

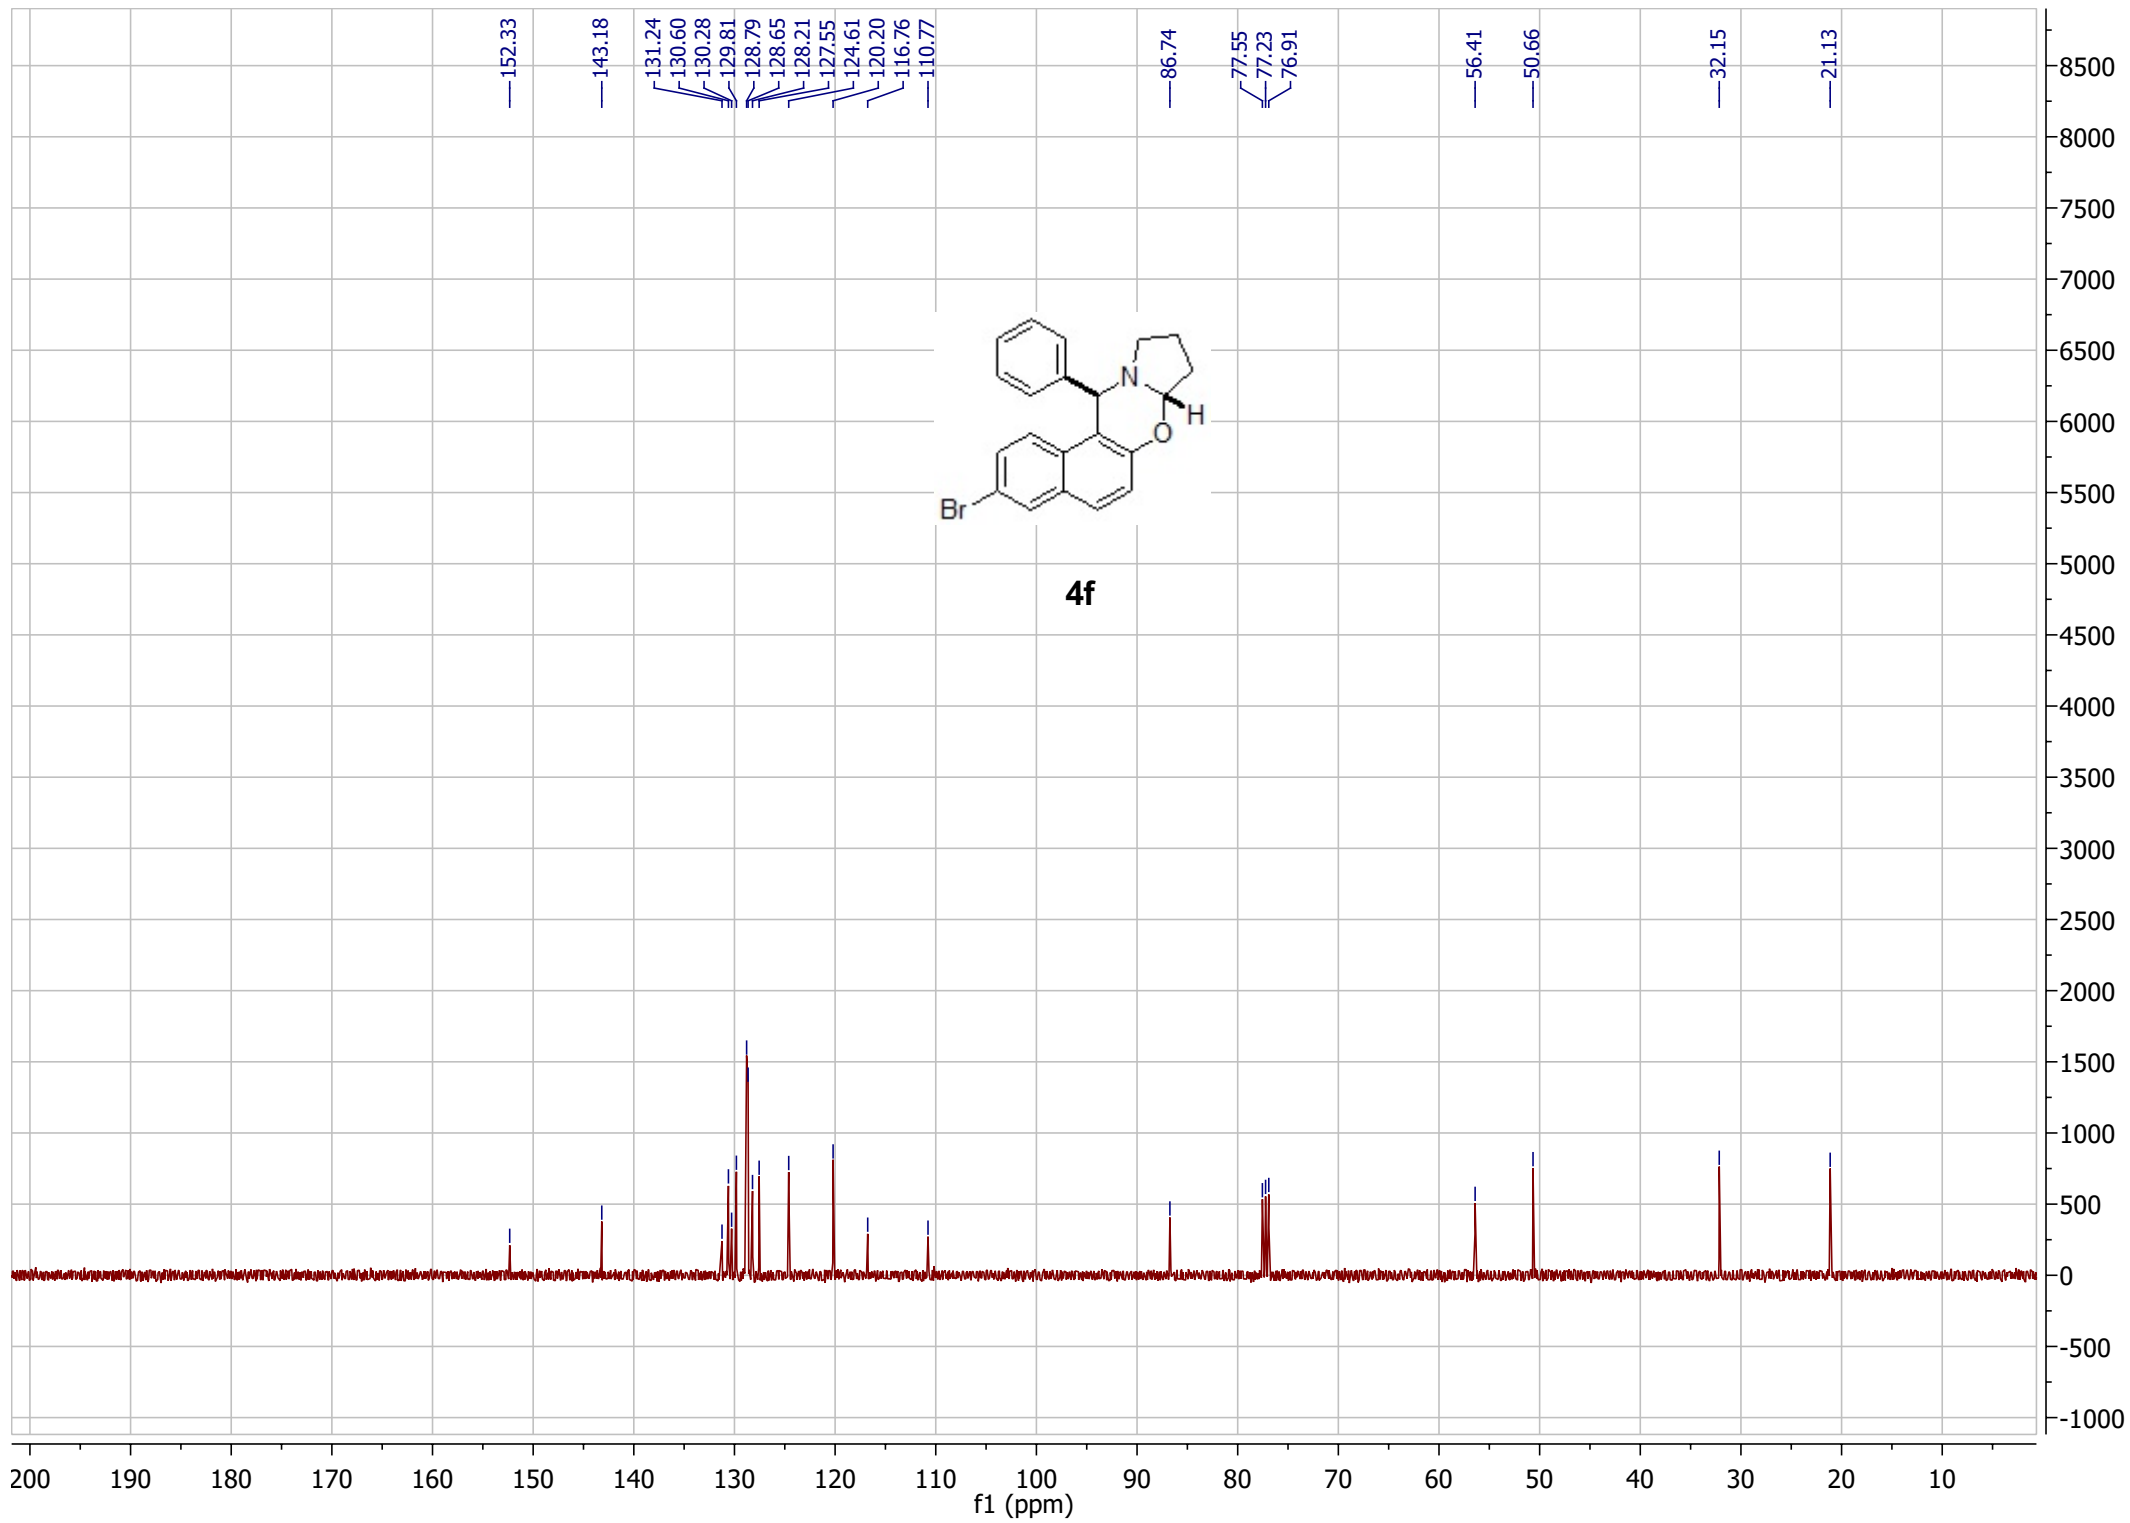

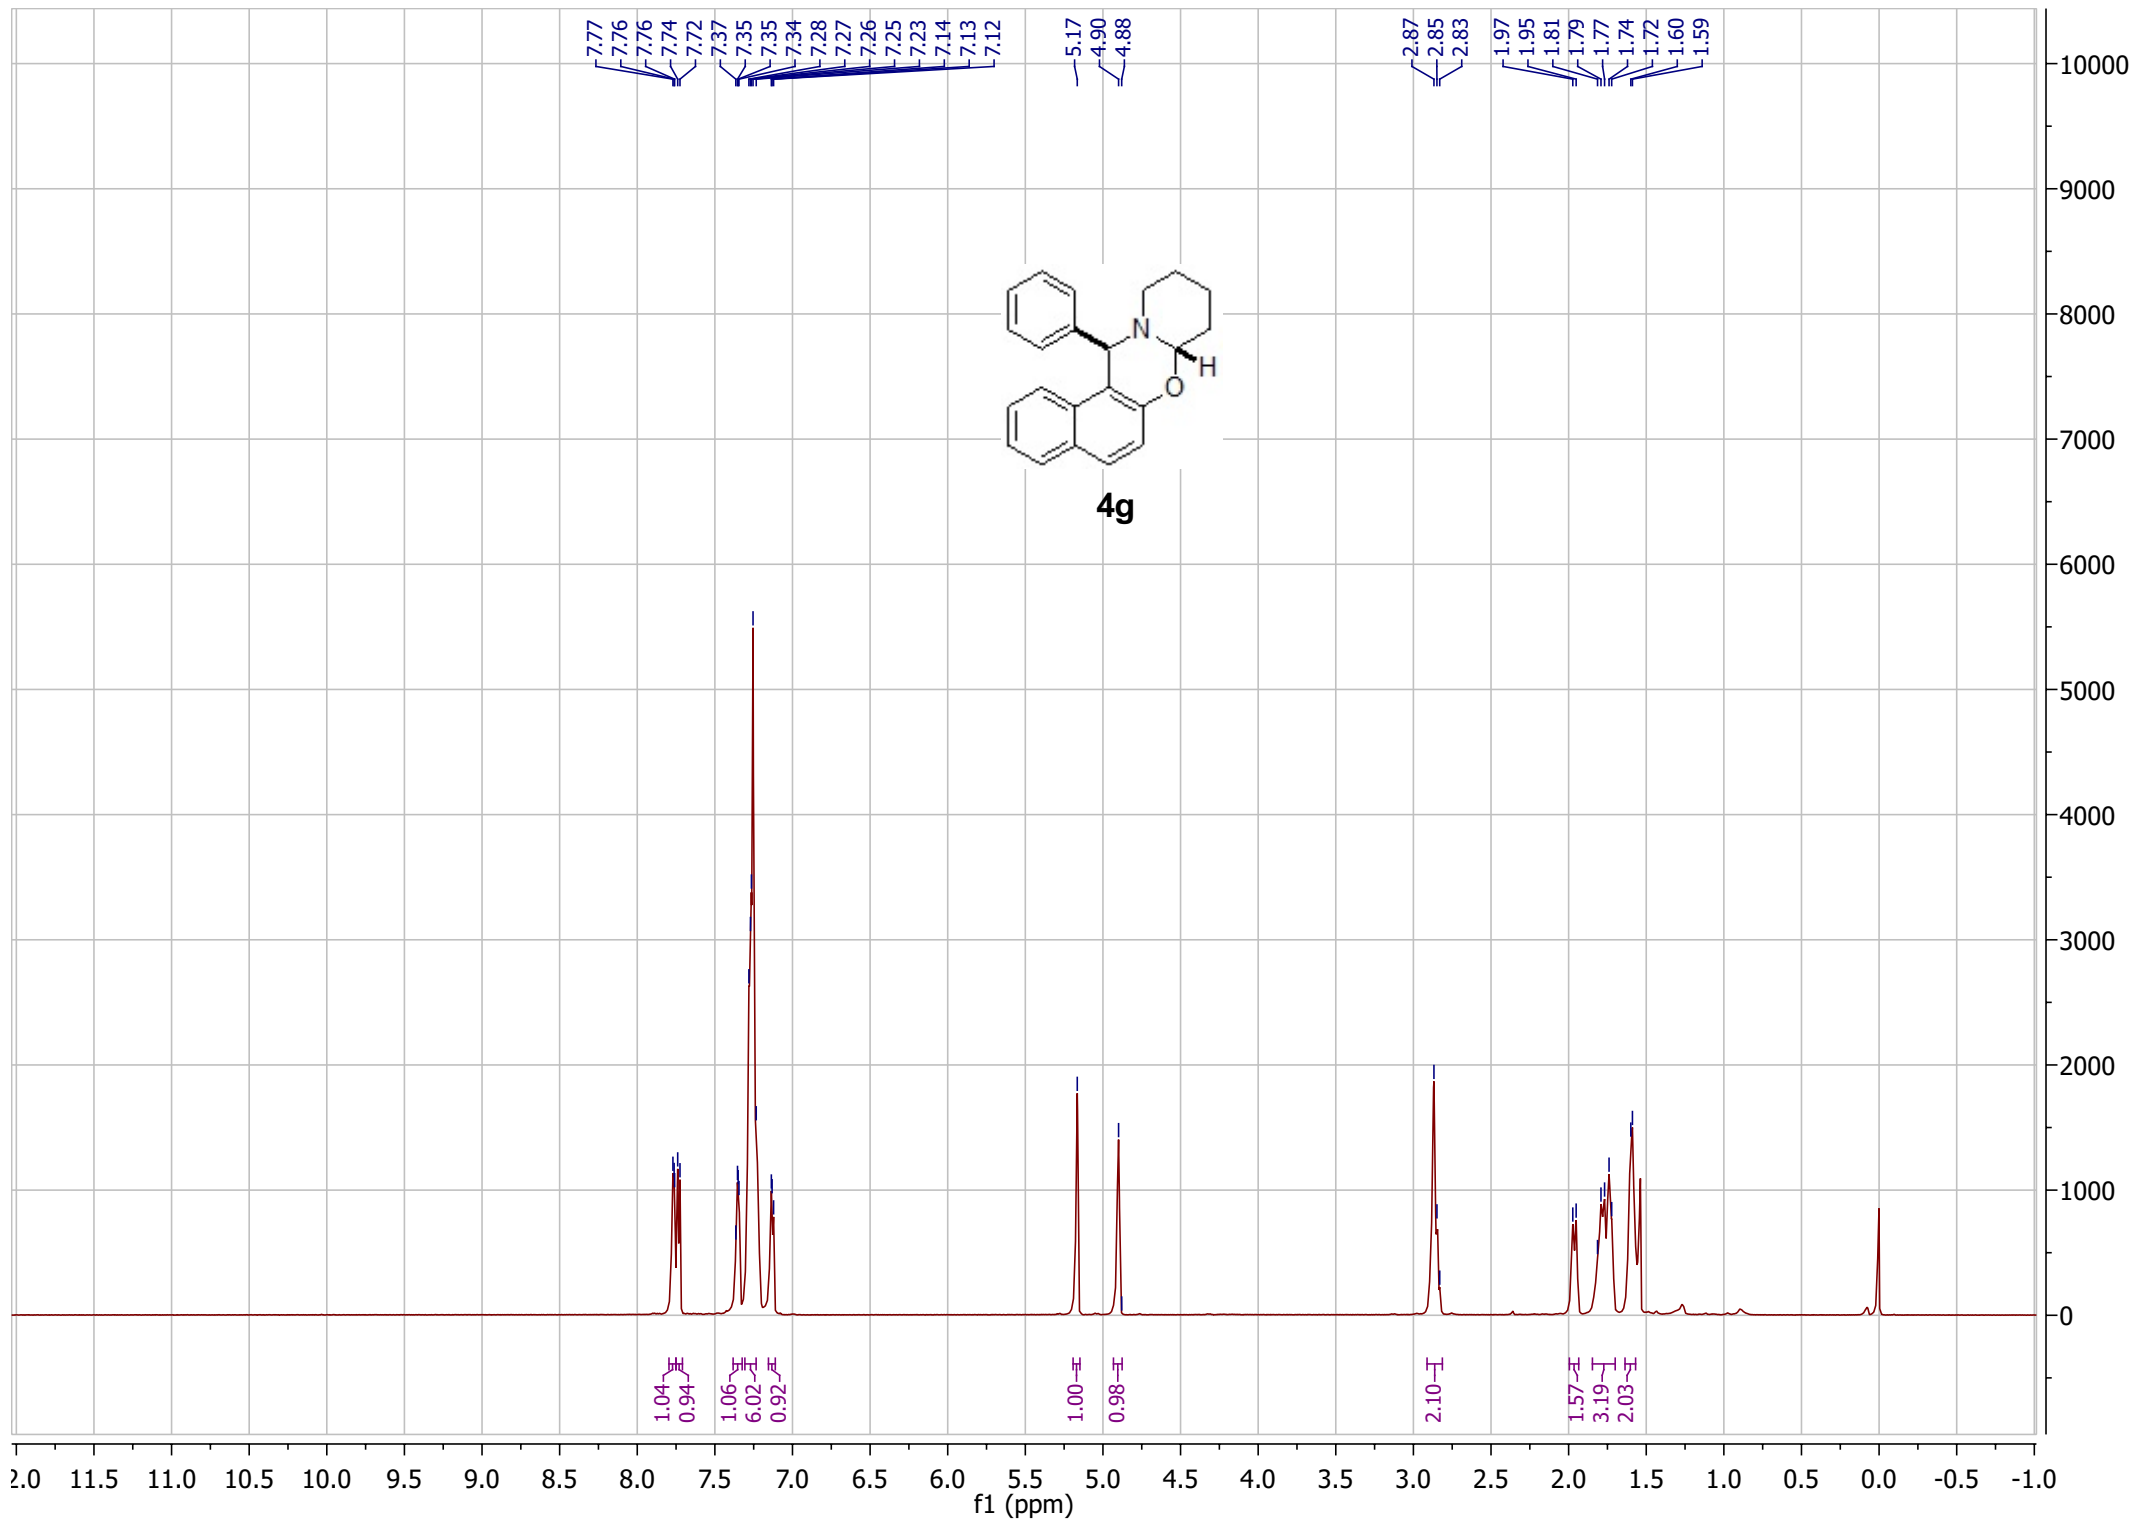

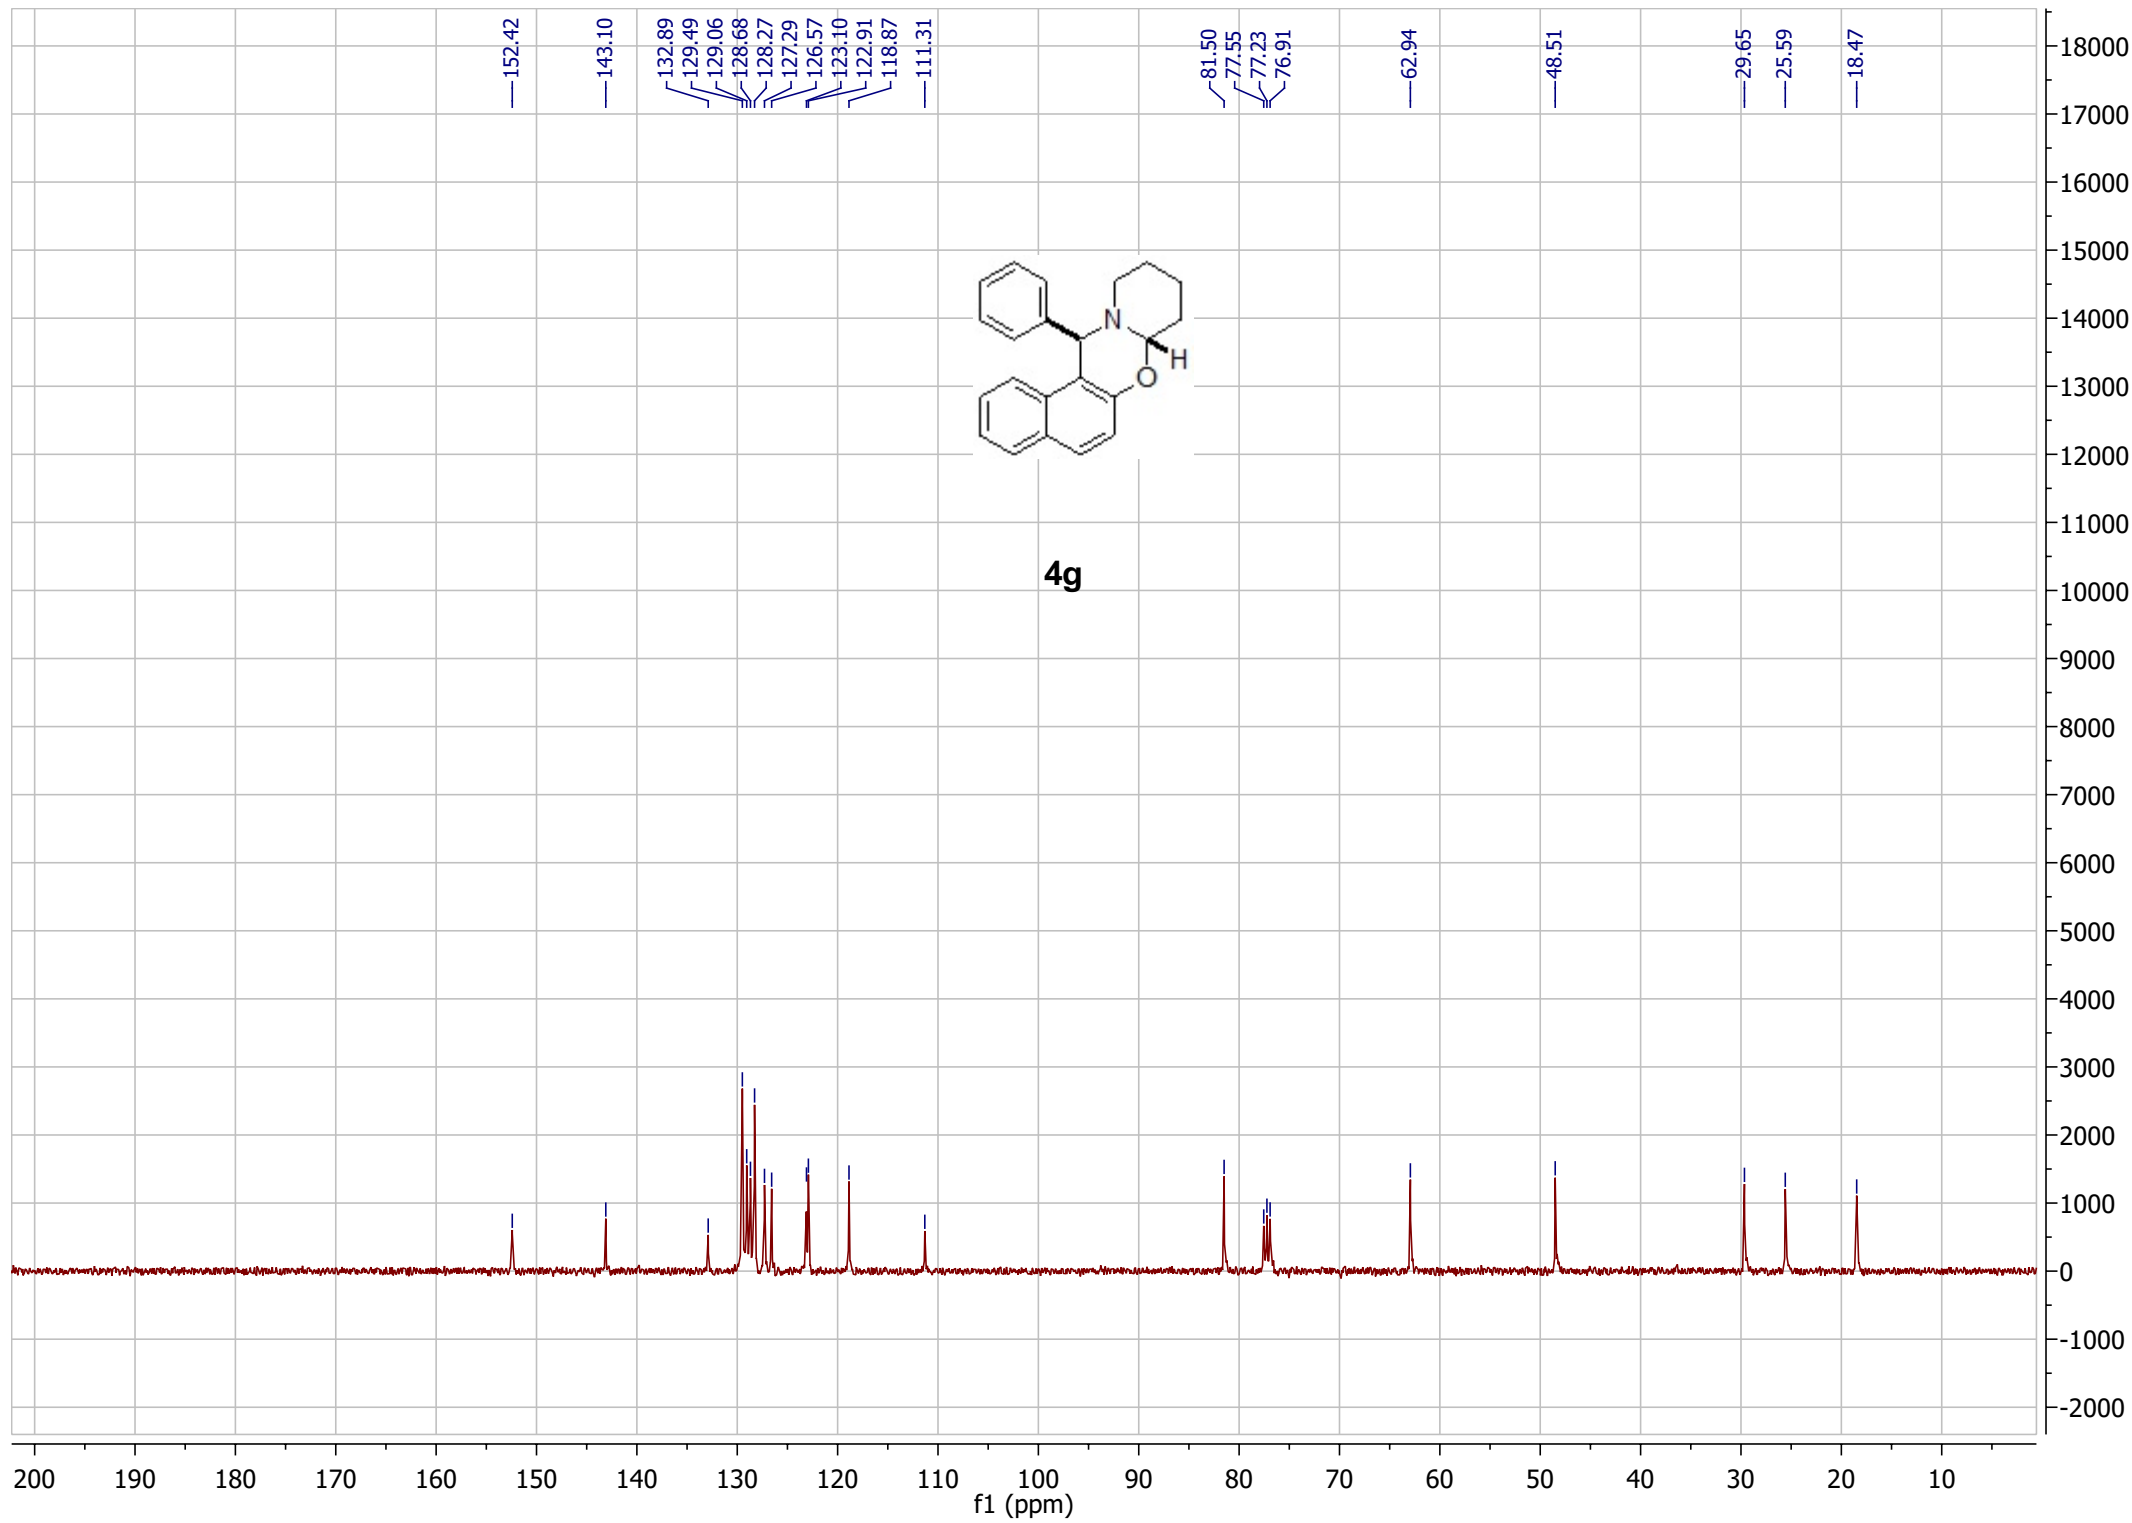



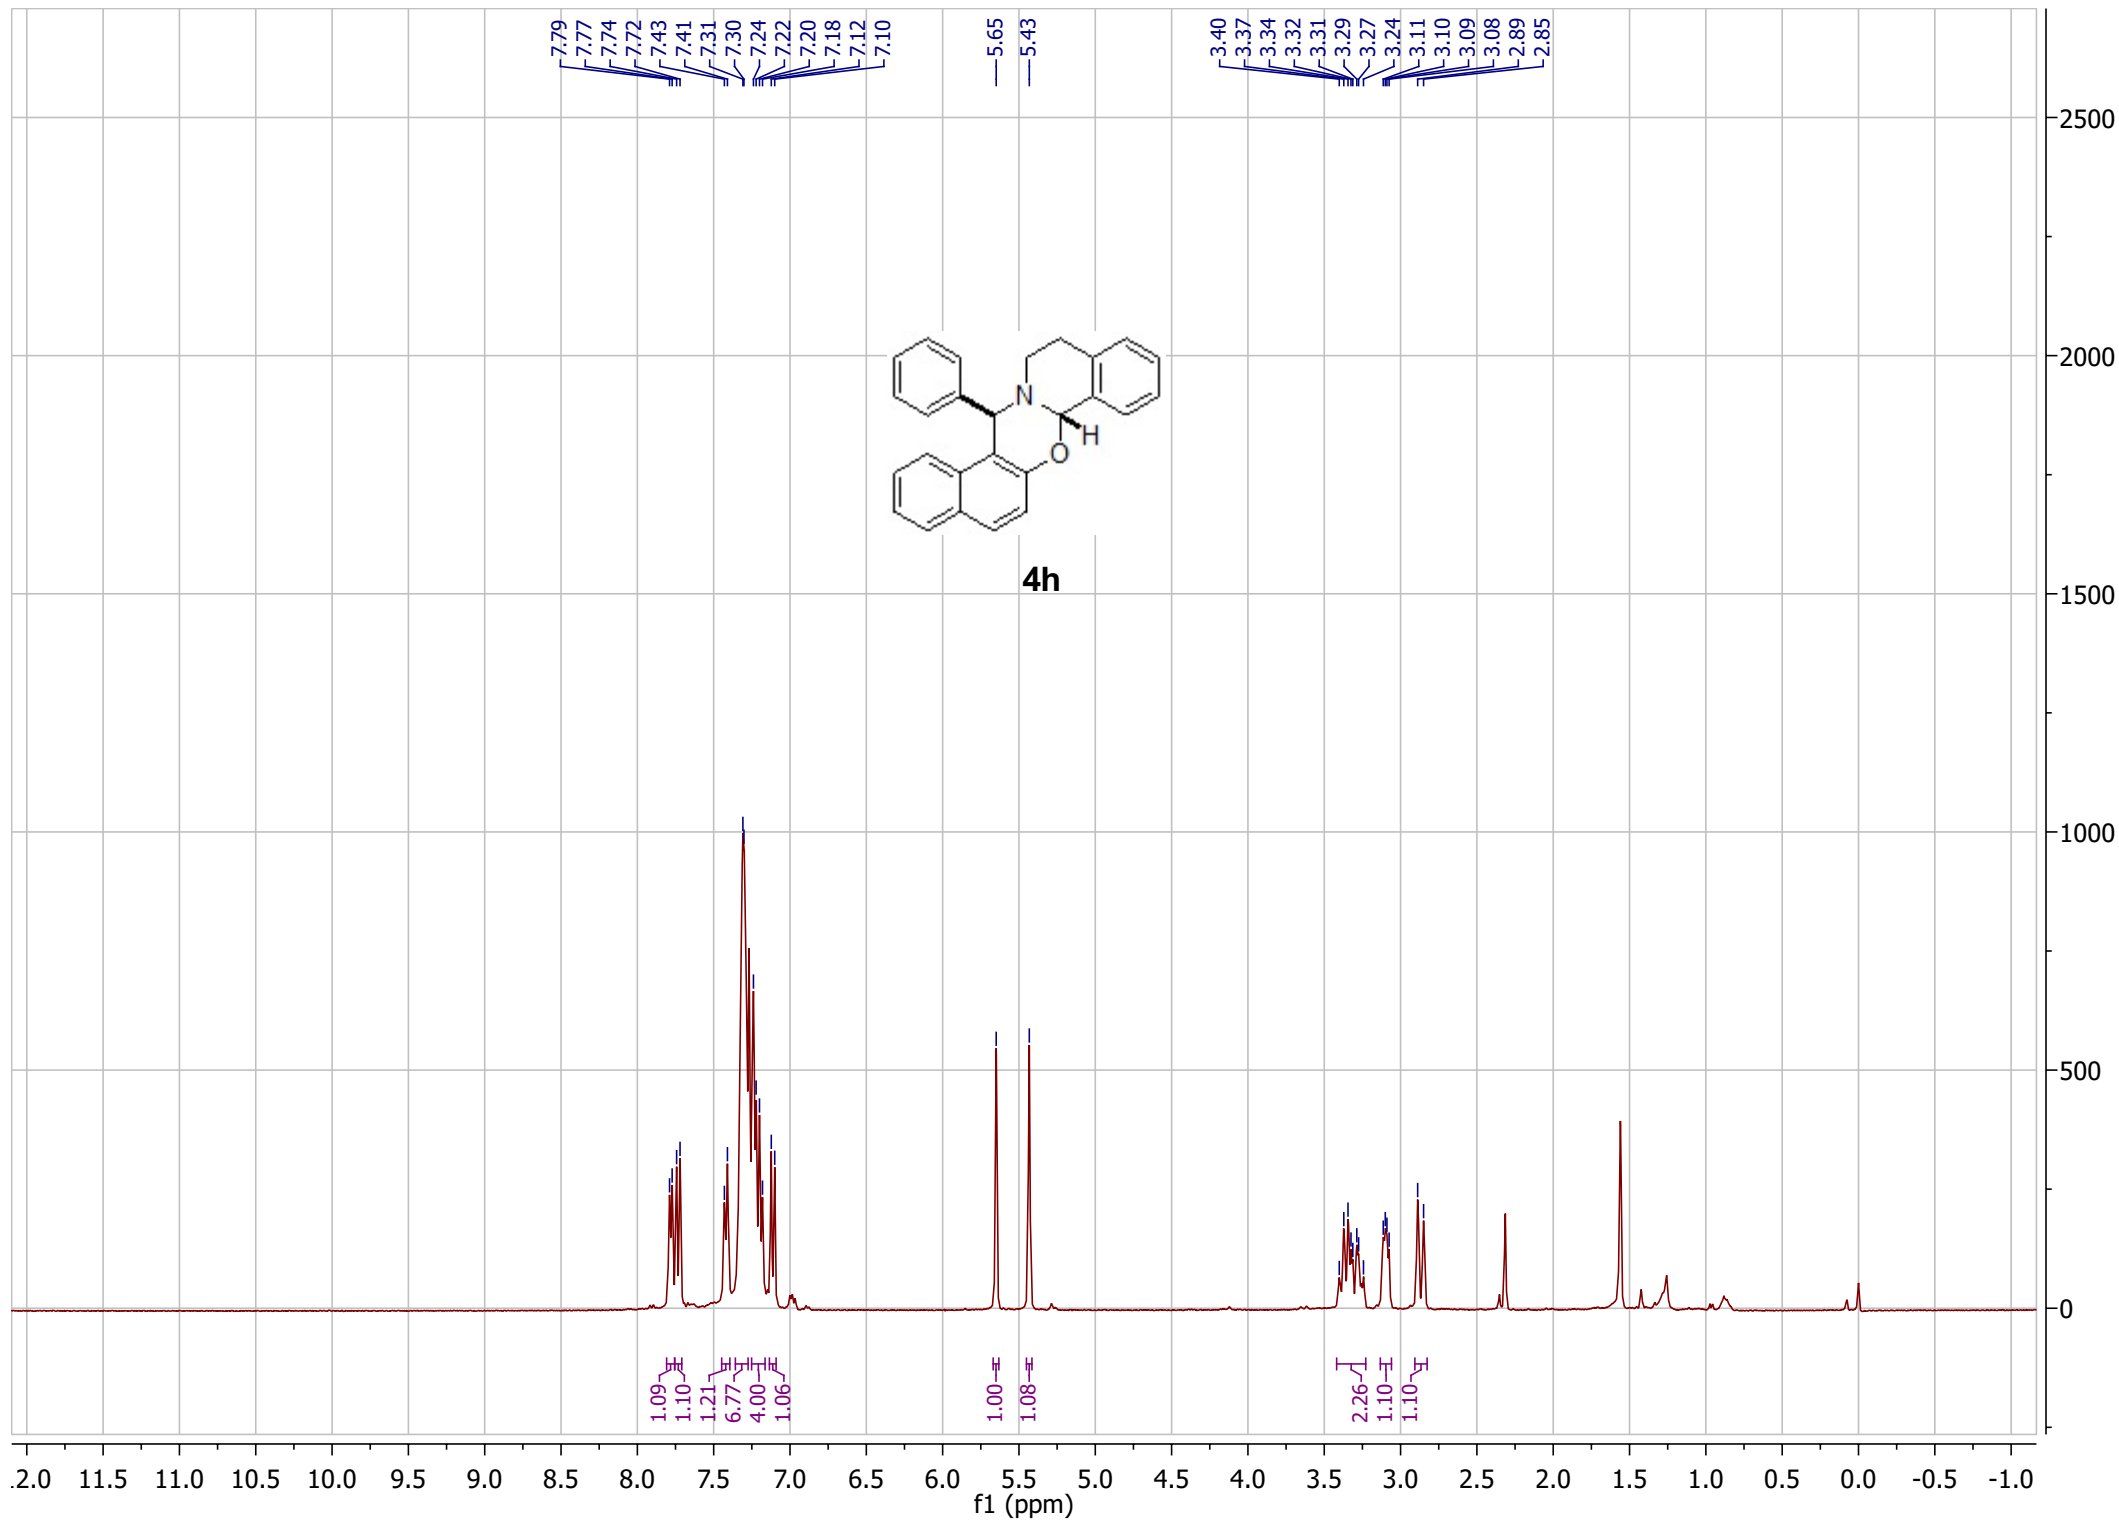

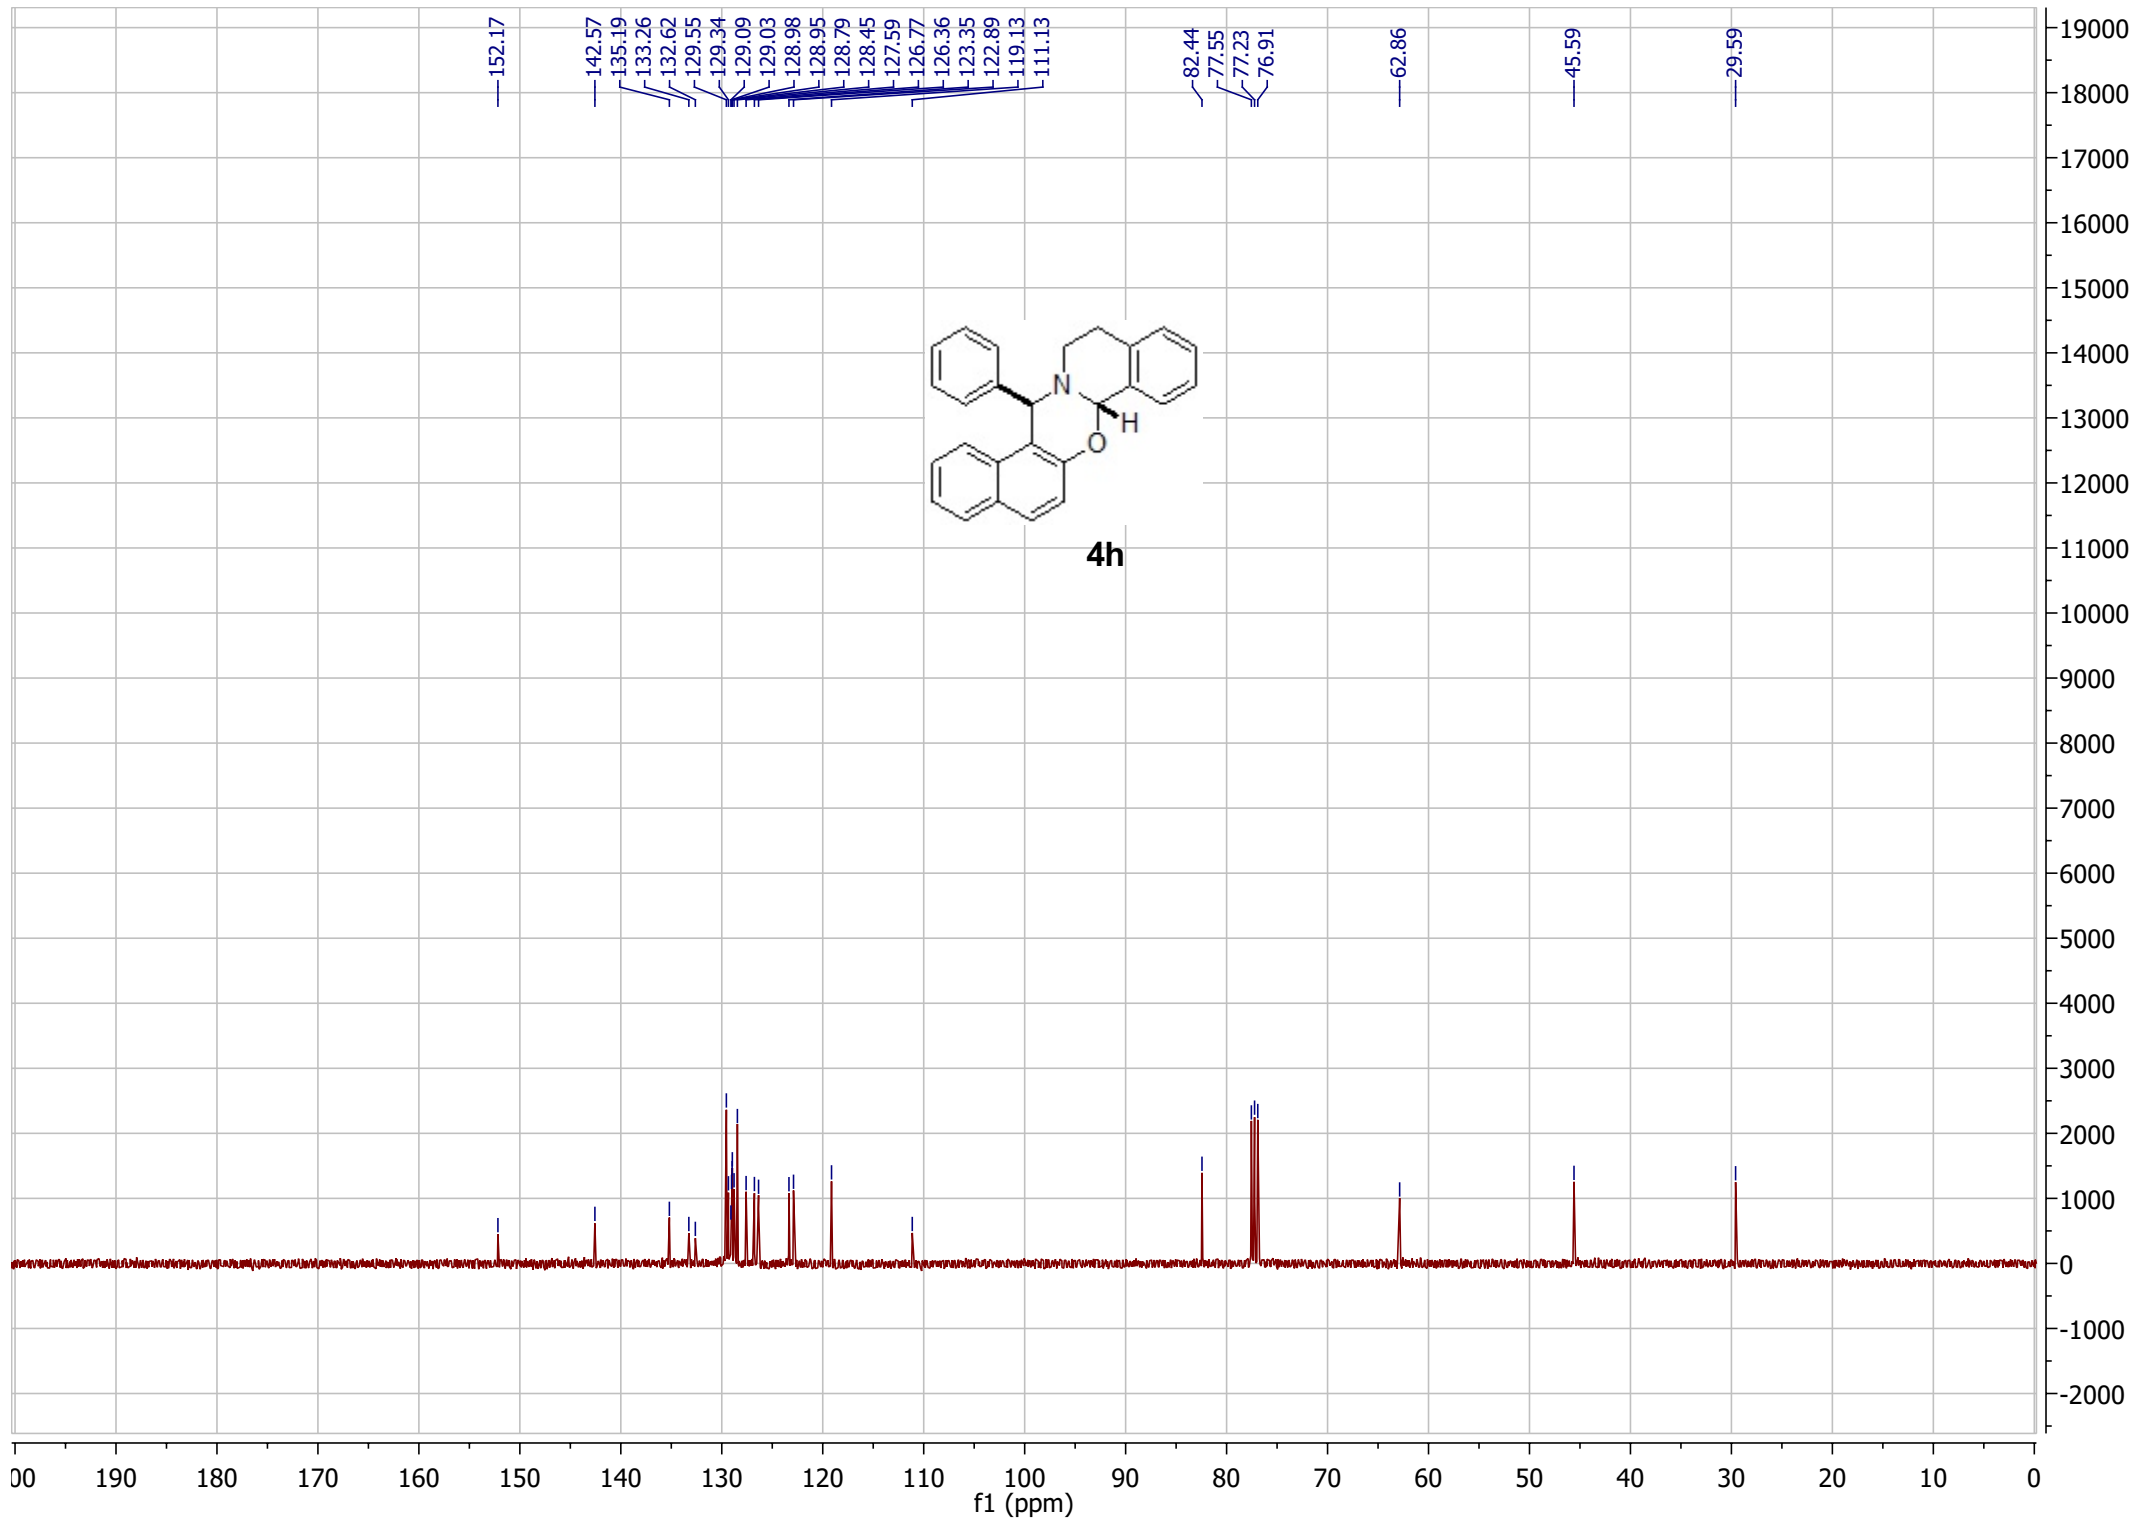

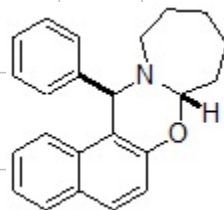

4i

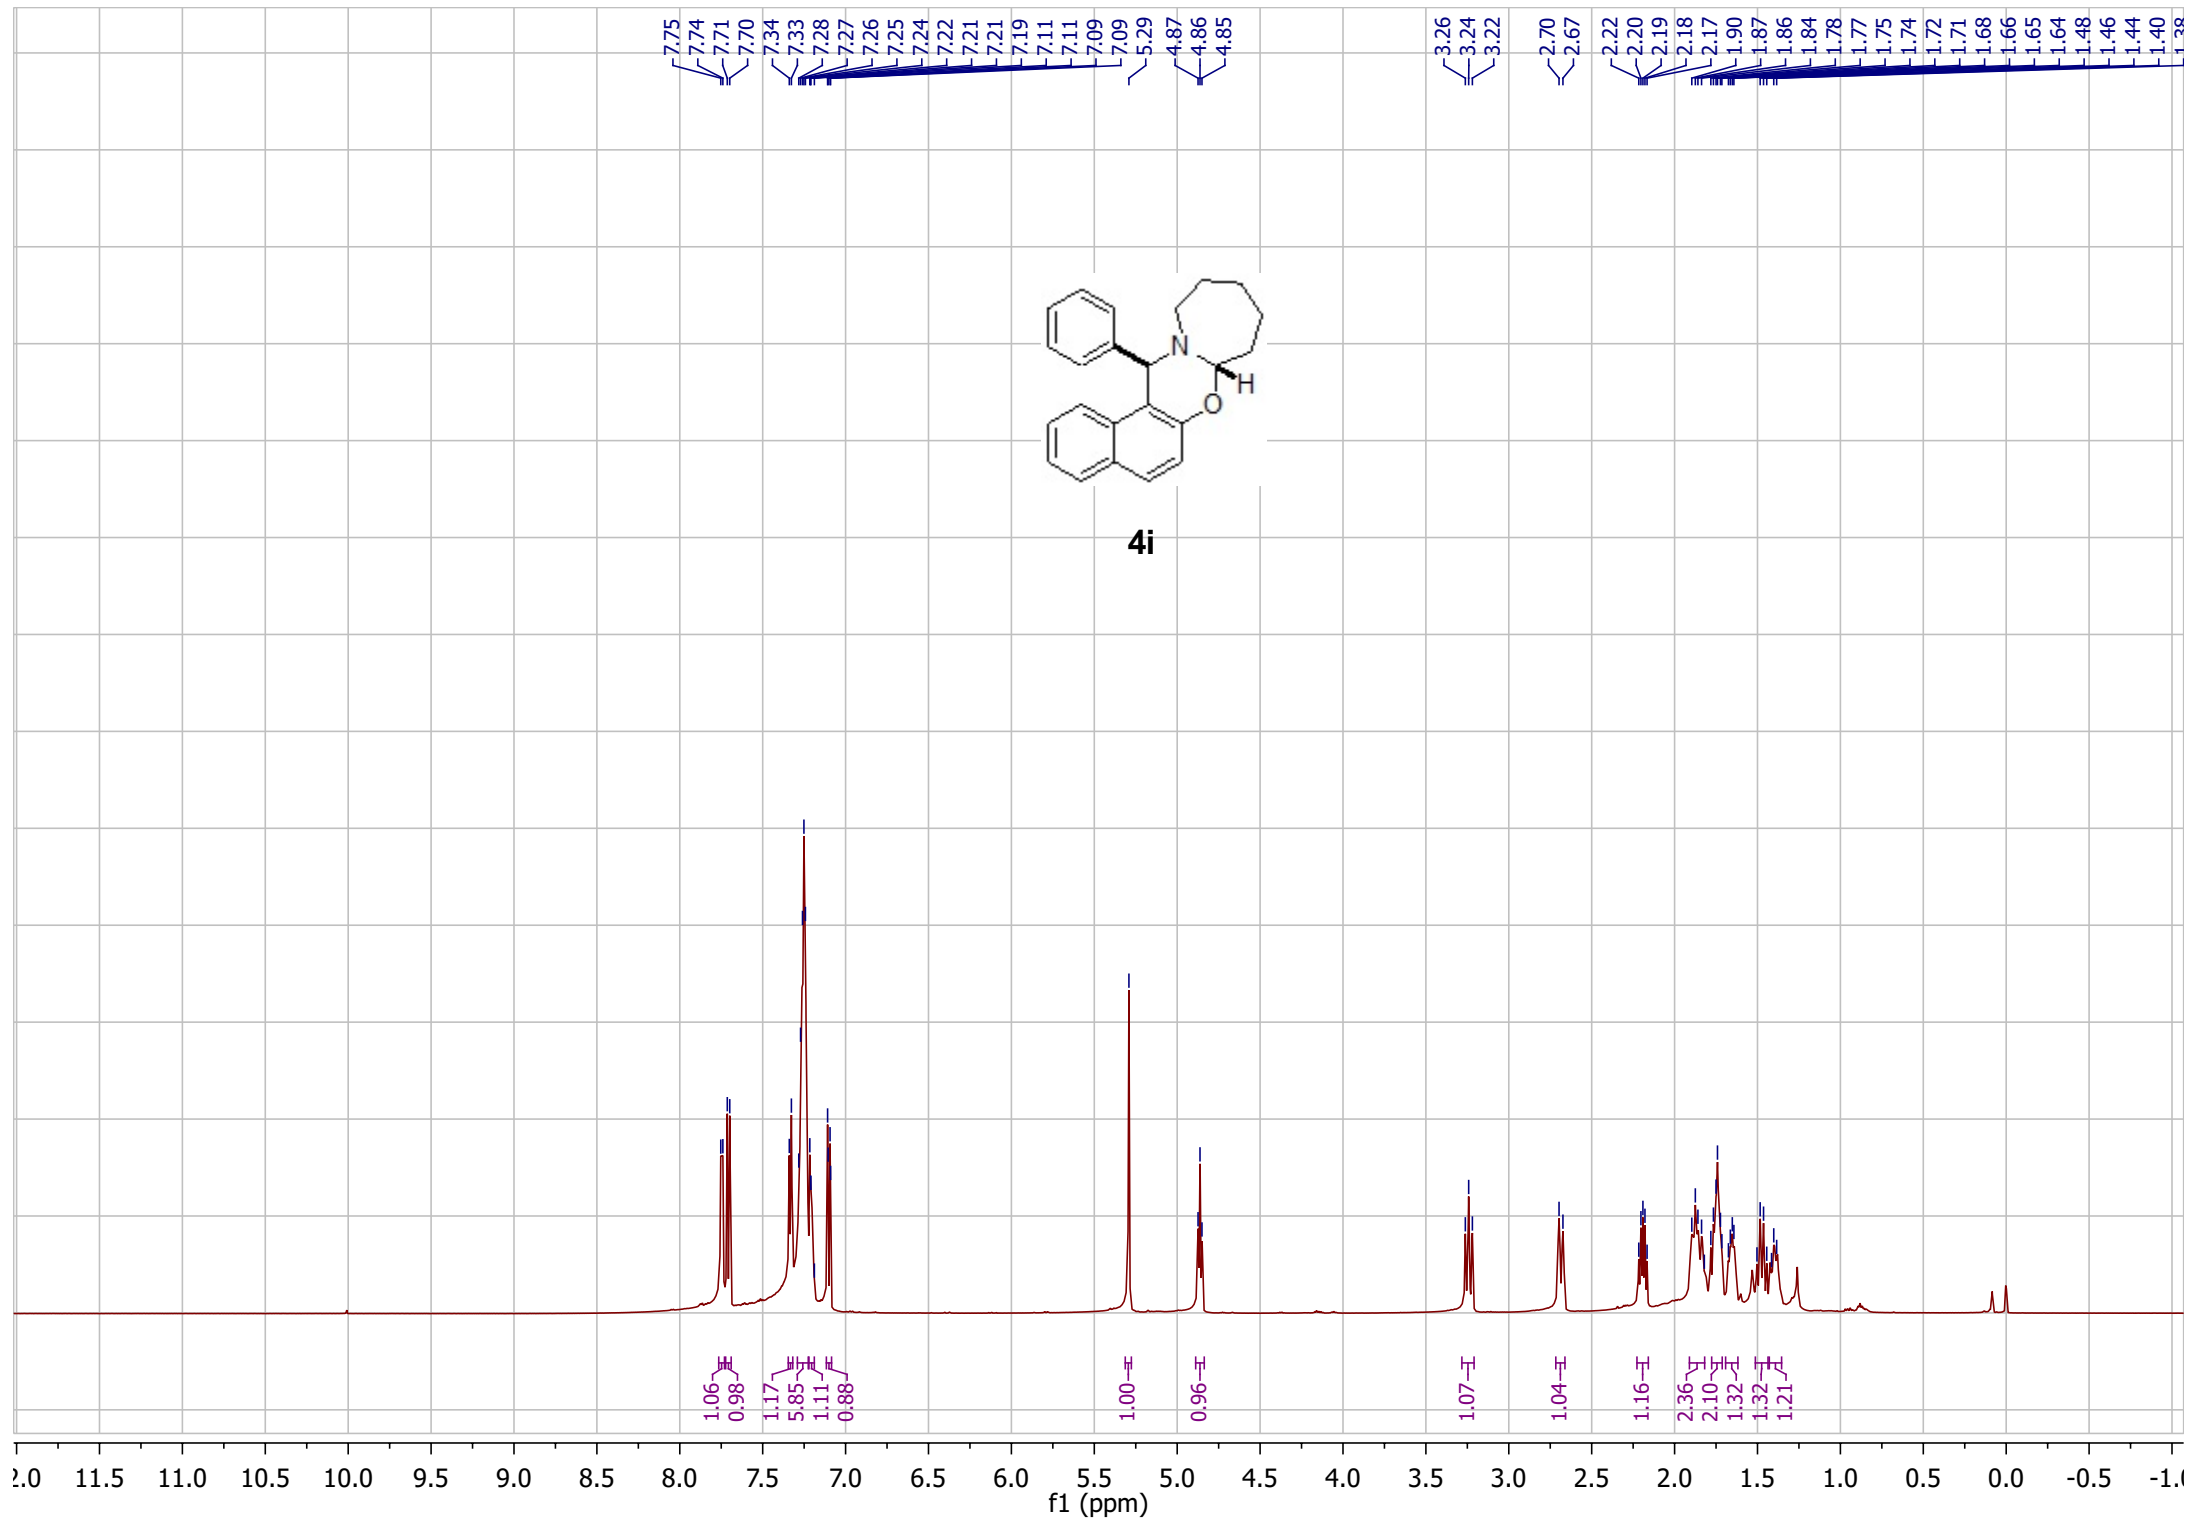

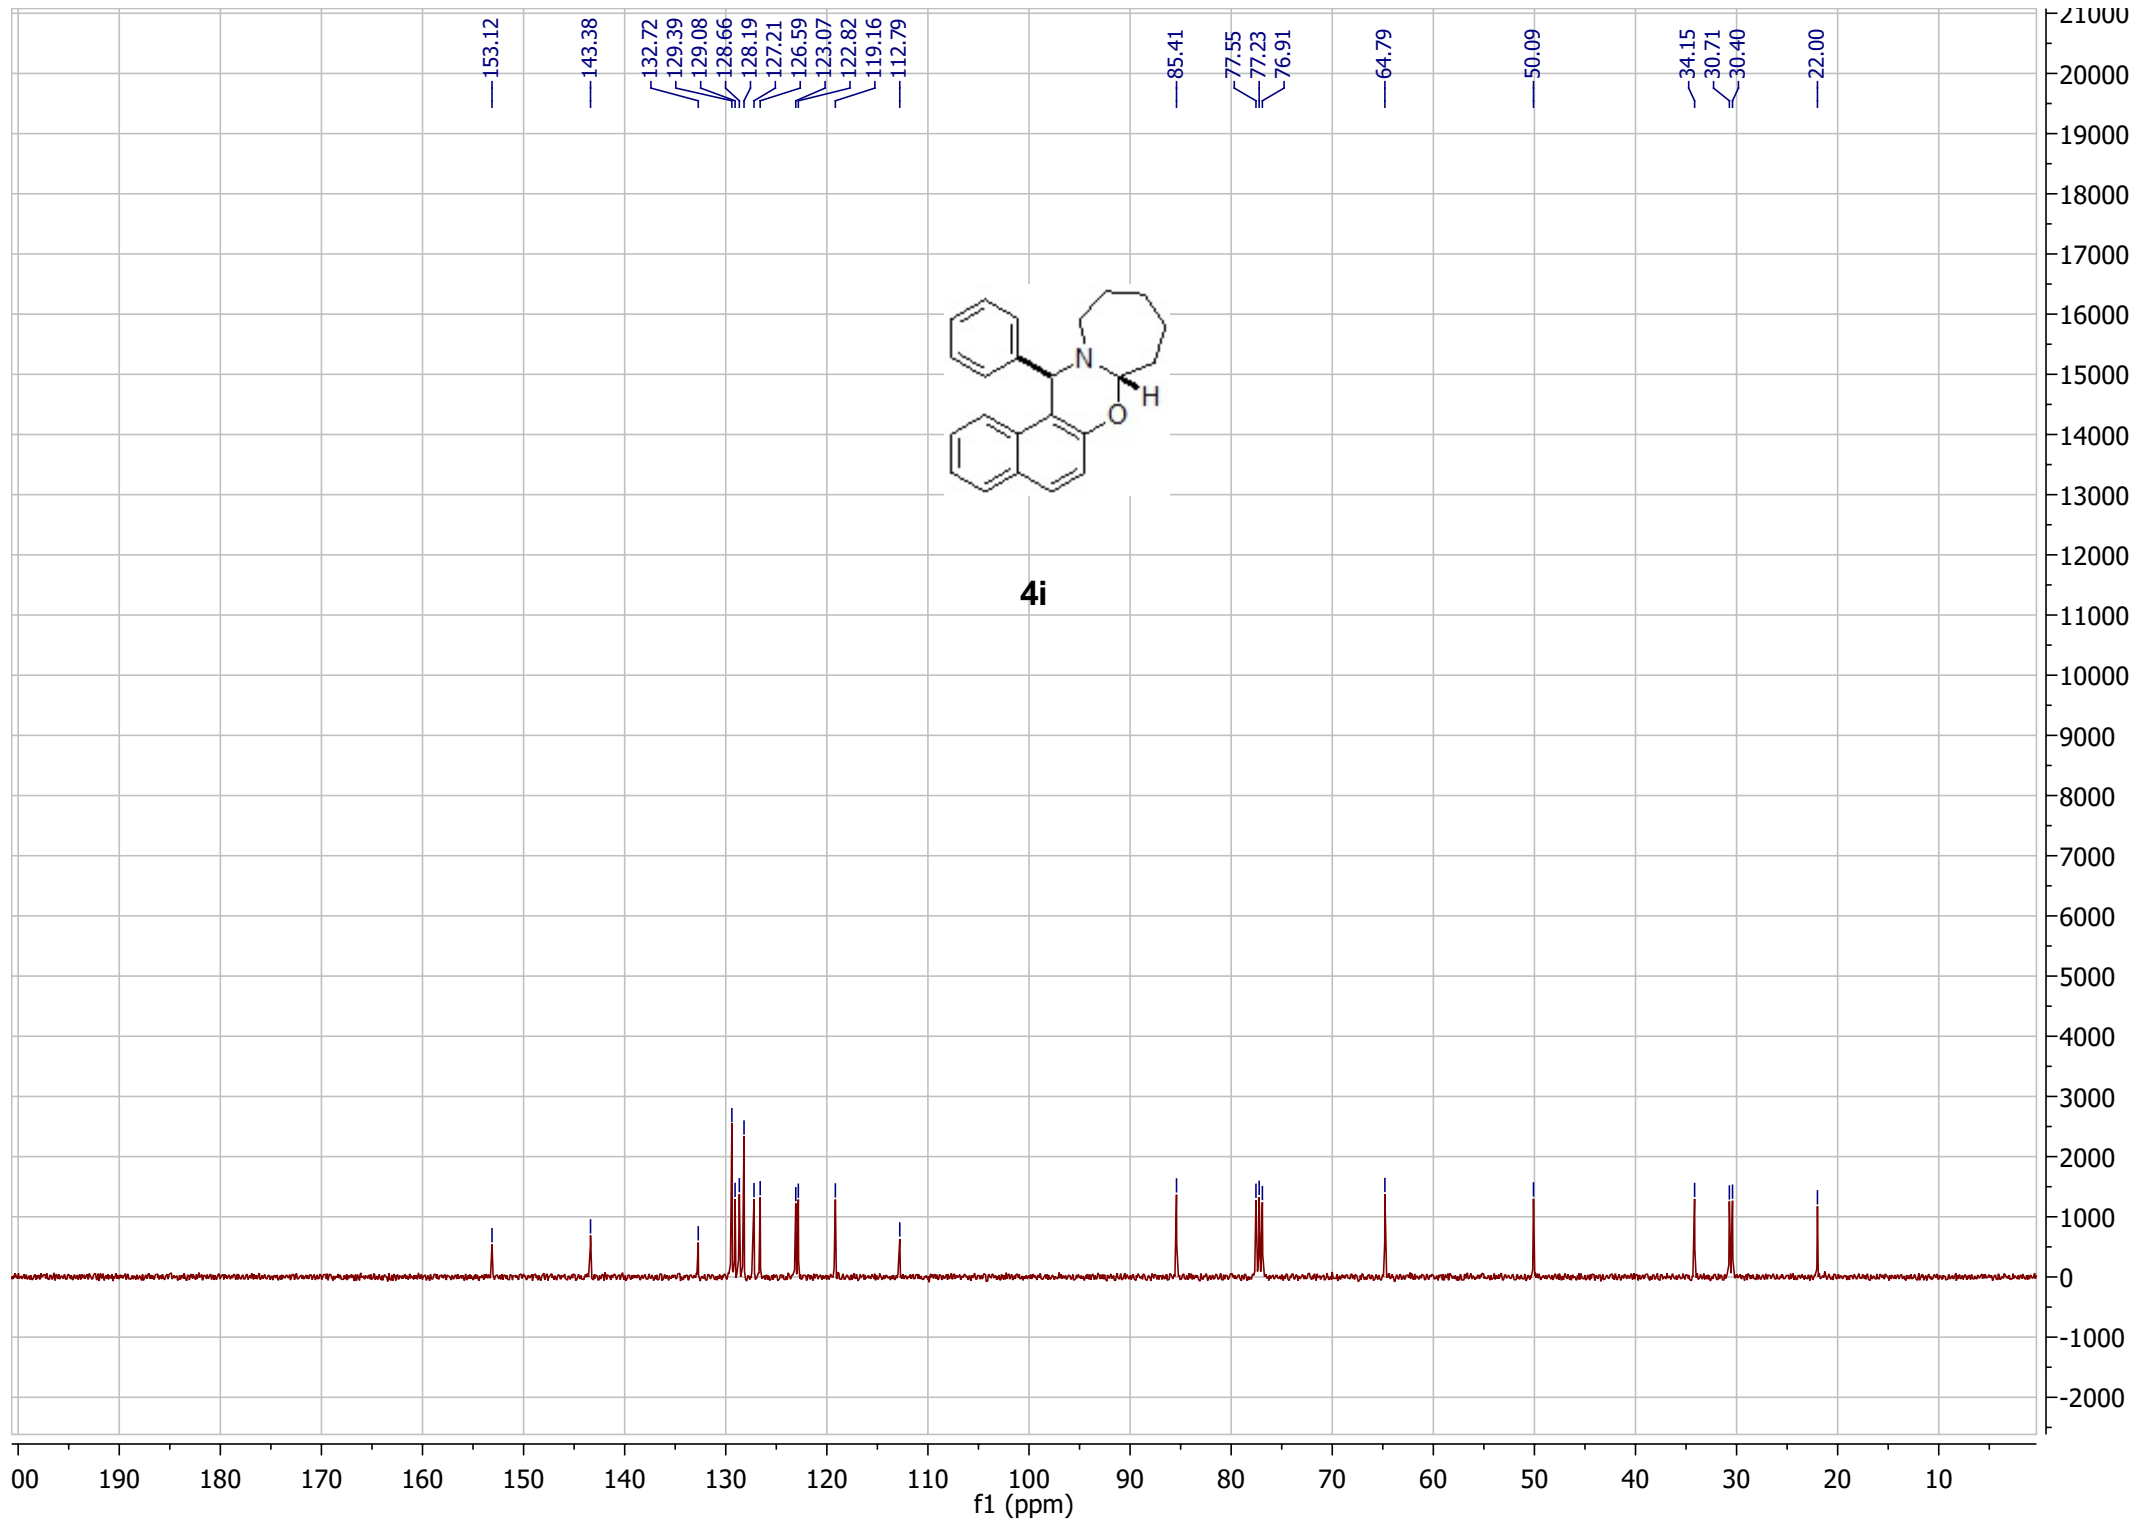

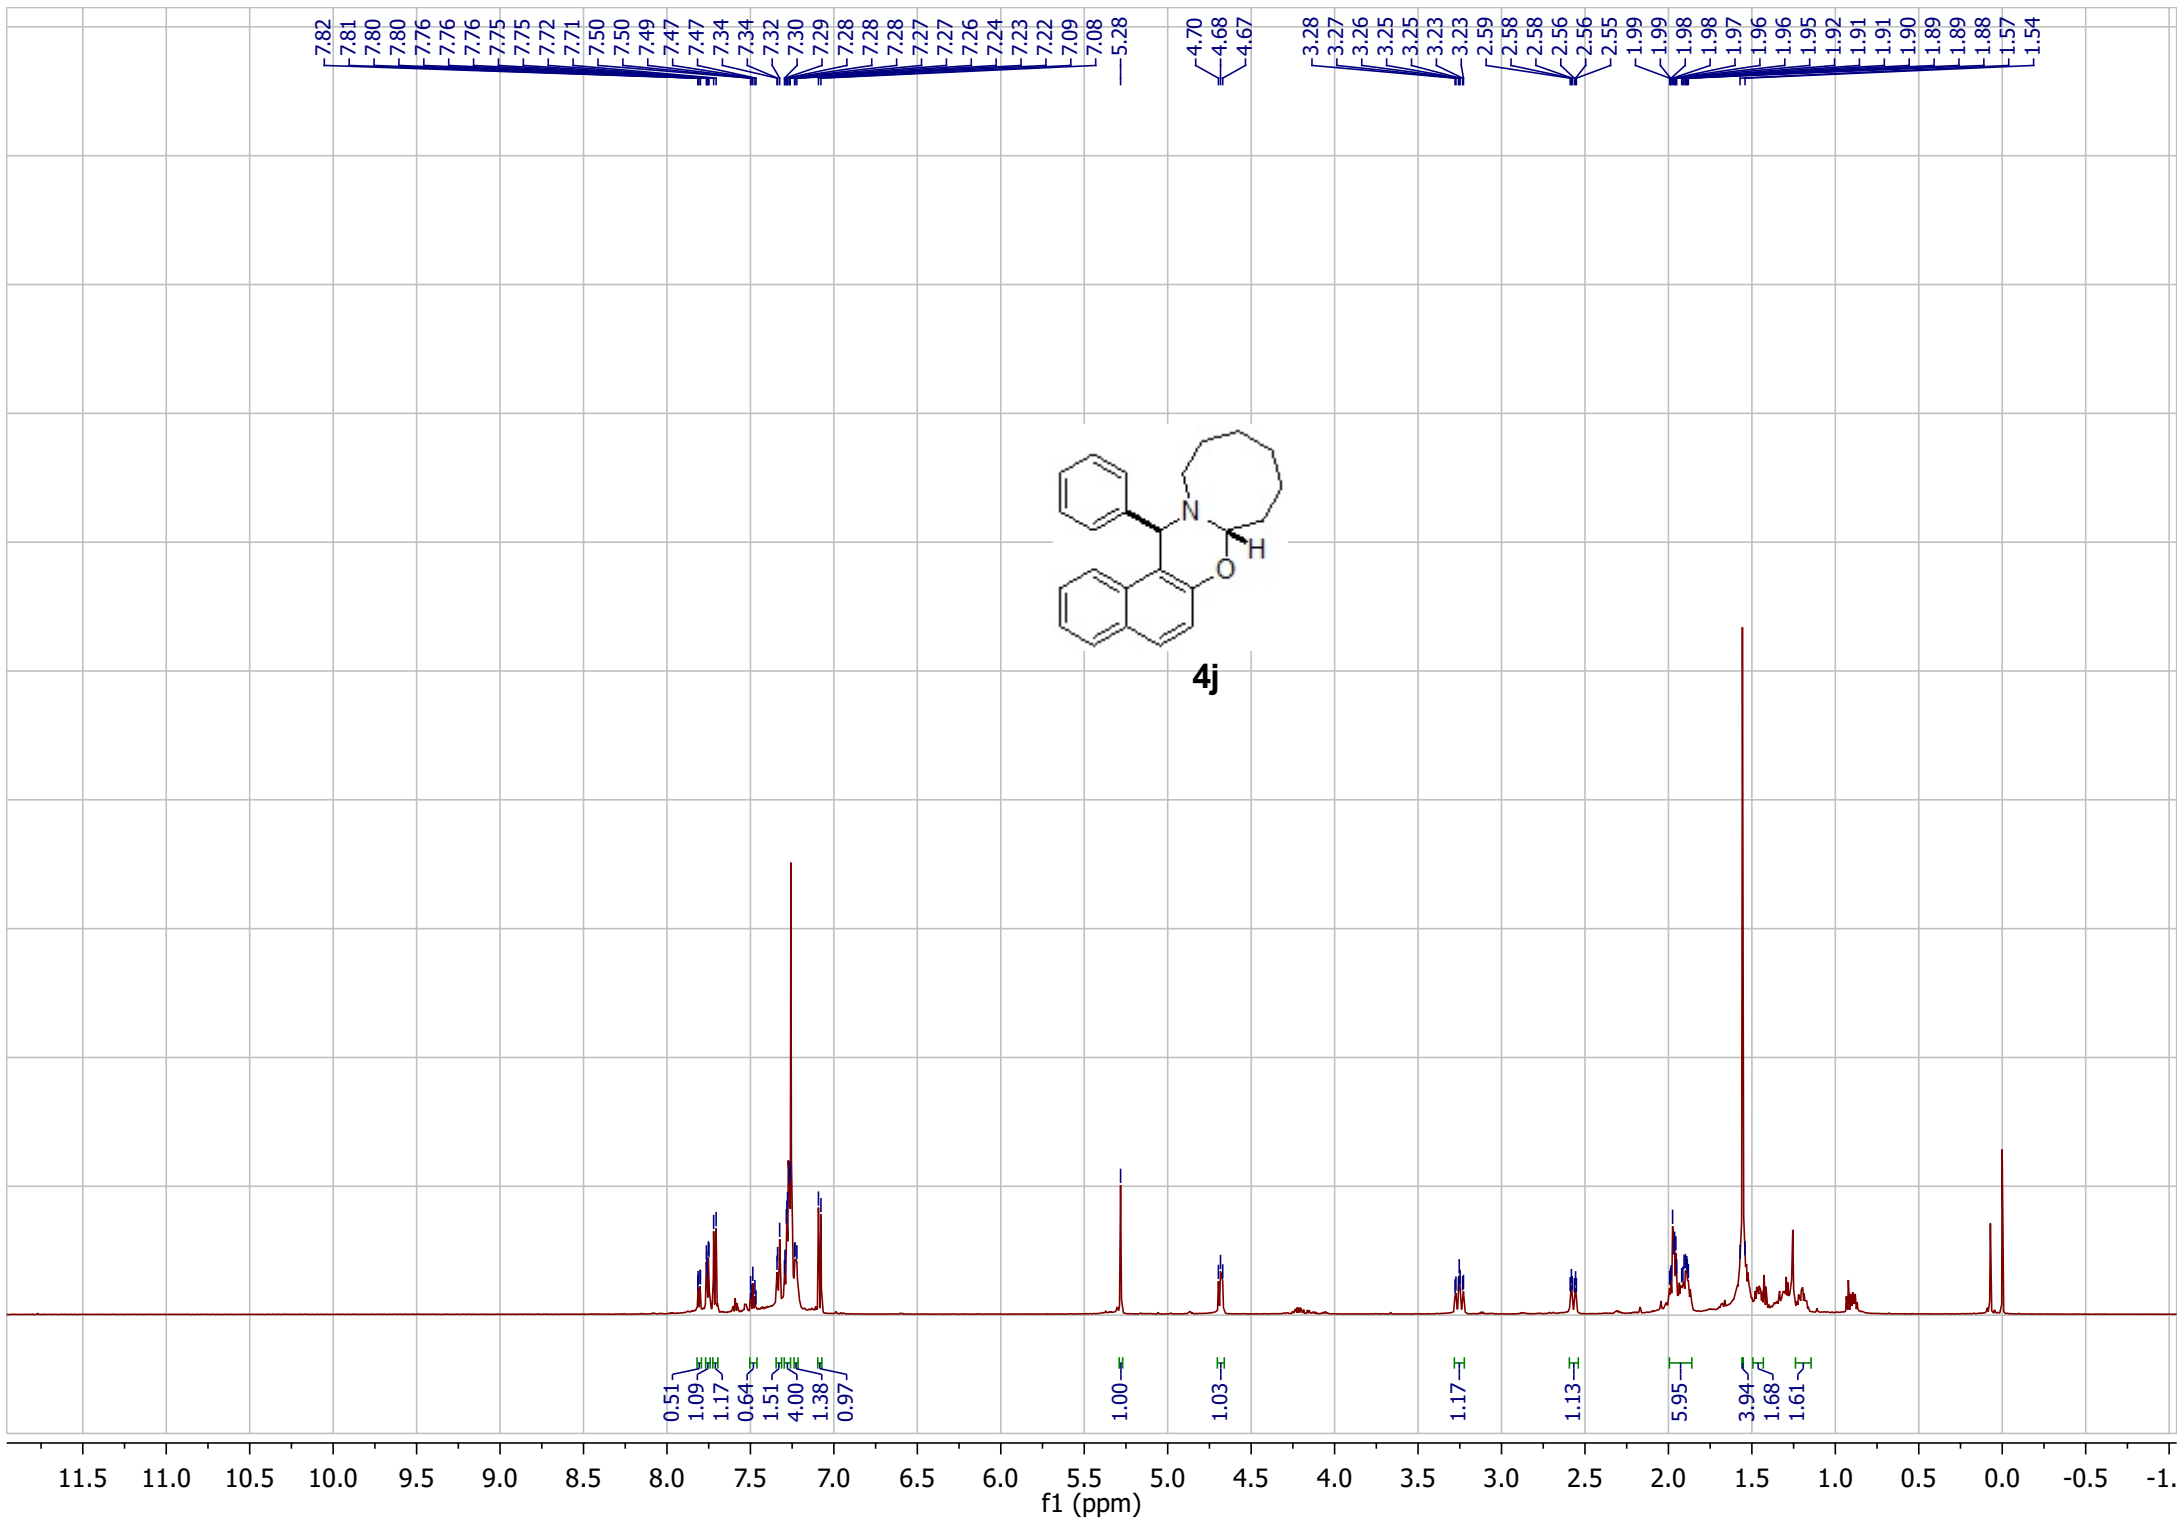

CKJ-2-92A-13C

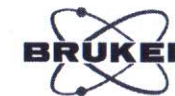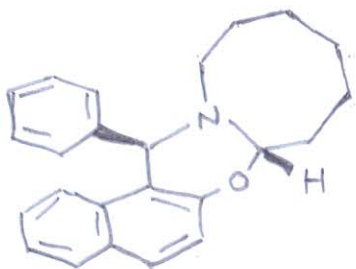

153.78  
143.17  
133.12  
129.64  
129.07  
128.73  
128.69  
128.24  
127.21  
126.60  
123.12  
122.91  
119.24  
112.70  
86.04  
77.44  
77.23  
77.02  
63.79  
47.06  
30.25  
29.99  
26.50  
25.61  
24.01

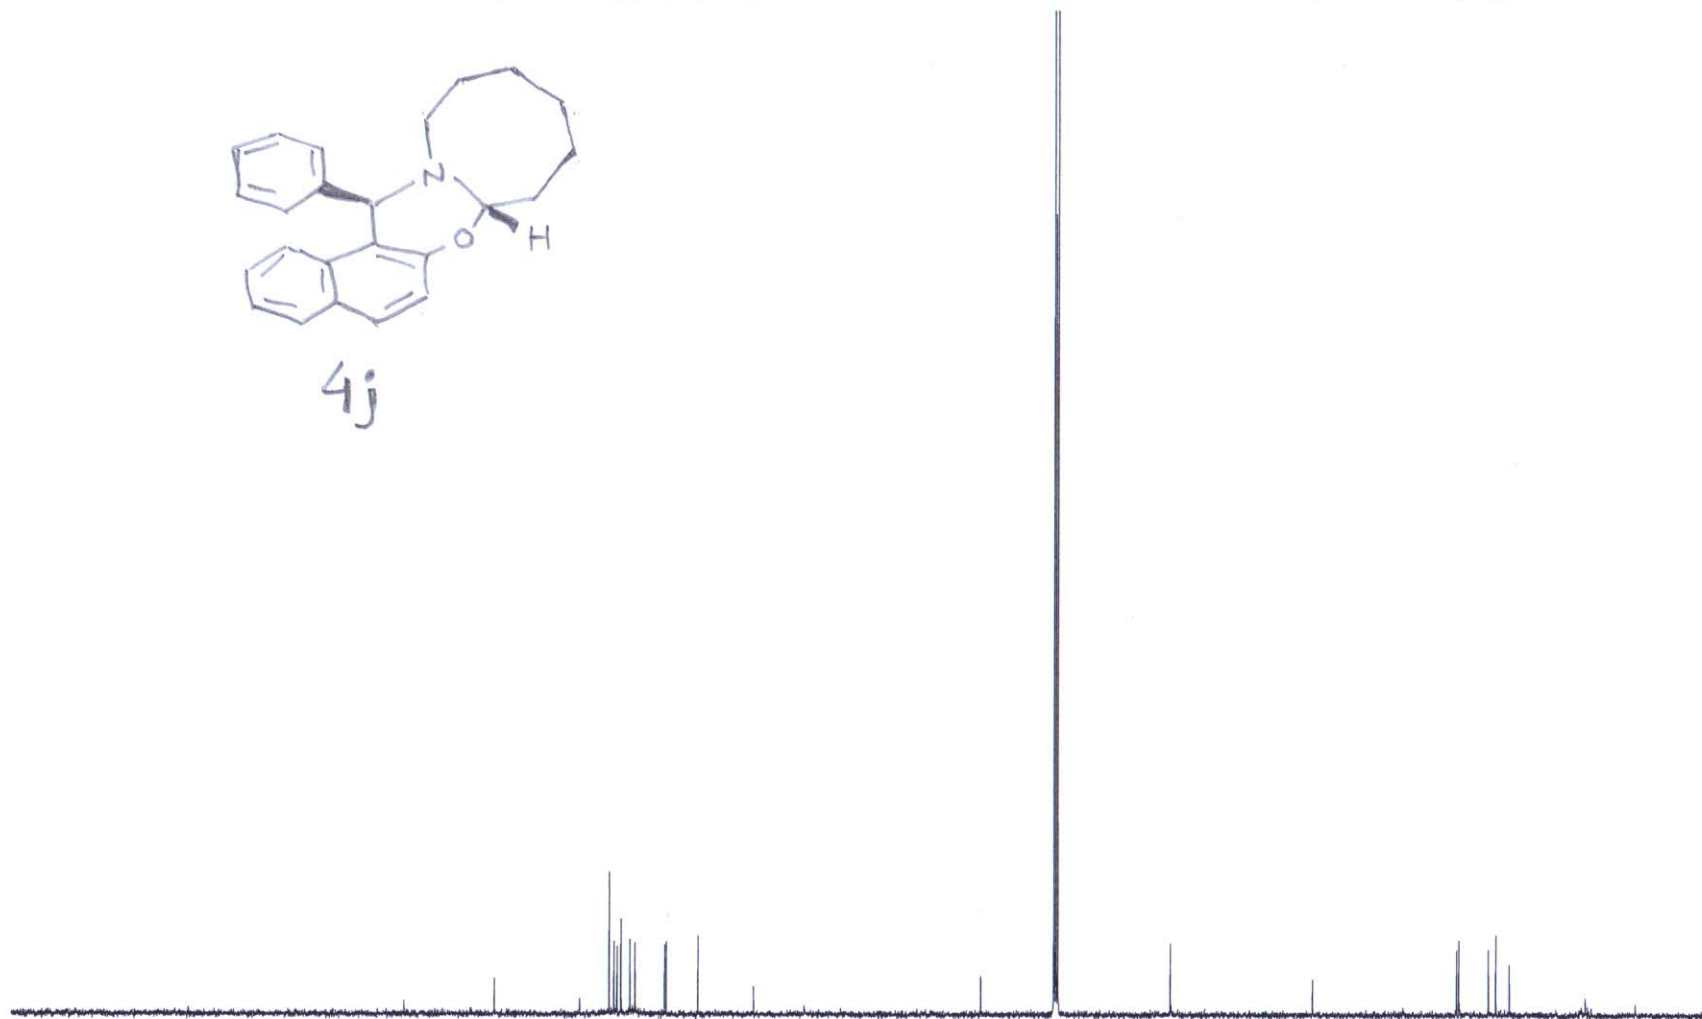

190 180 170 160 150 140 130 120 110 100 90 80 70 60 50 40 30 20 ppm

Current Data Parameters  
NAME CKJ-2-92A-13C  
EXPNO 1  
PROCNO 1

F2 - Acquisition Parameters  
Date\_ 20140813  
Time 16.59  
INSTRUM spect  
PROBHD 5 mm PABBO BB/  
FULPROG zgpg30  
TD 32768  
SOLVENT CDCl3  
NS 621  
DS 2  
SWH 36057.691 Hz  
FIDRES 1.100393 Hz  
AQ 0.4543829 sec  
RG 65.24  
DW 13.867 usec  
DE 6.50 usec  
TE 299.8 K  
D1 2.00000000 sec  
D11 0.03000000 sec  
TDO 1

==== CHANNEL f1 =====  
SFO1 150.9279571 MHz  
NUC1 13C  
P1 10.50 usec  
PLW1 95.00000000 W

==== CHANNEL f2 =====  
SFO2 600.1724007 MHz  
NUC2 1H  
CPDPRG[2] waltz16  
PCPD2 70.00 usec  
PLW2 21.00000000 W  
PLW12 0.61714000 W  
PLW13 0.30239999 W

F2 - Processing parameters  
SI 16384  
SF 150.9128336 MHz  
WDW EM  
SSB 0  
LB 1.00 Hz  
GB 0  
PC 1.40

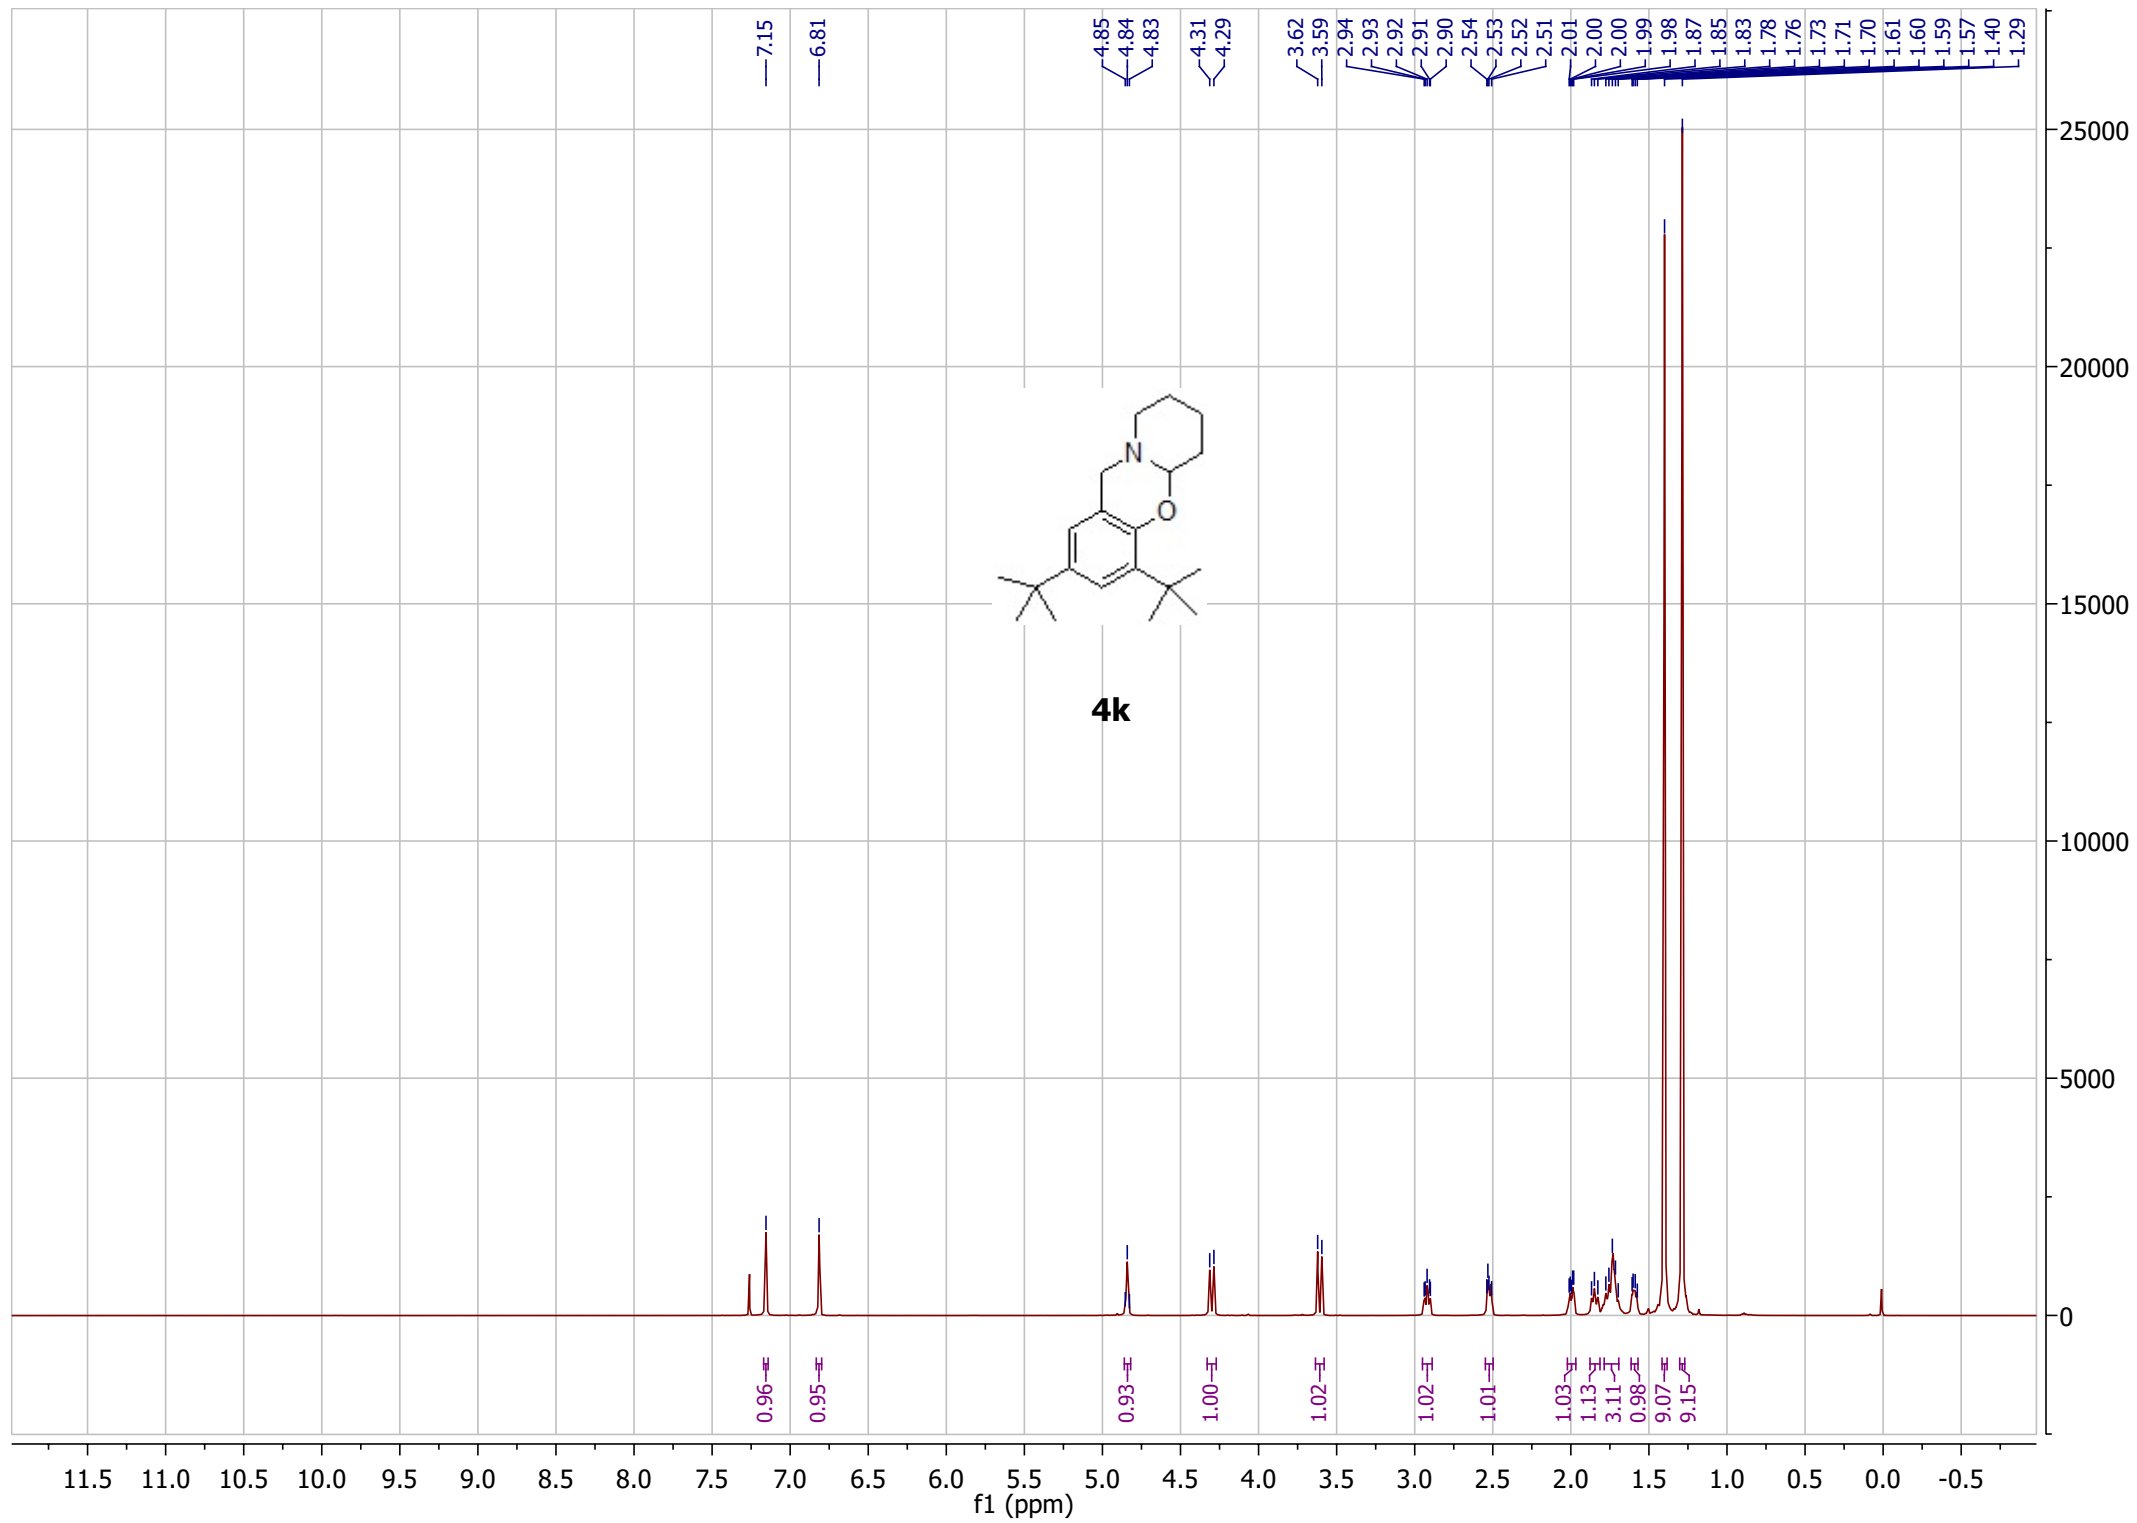

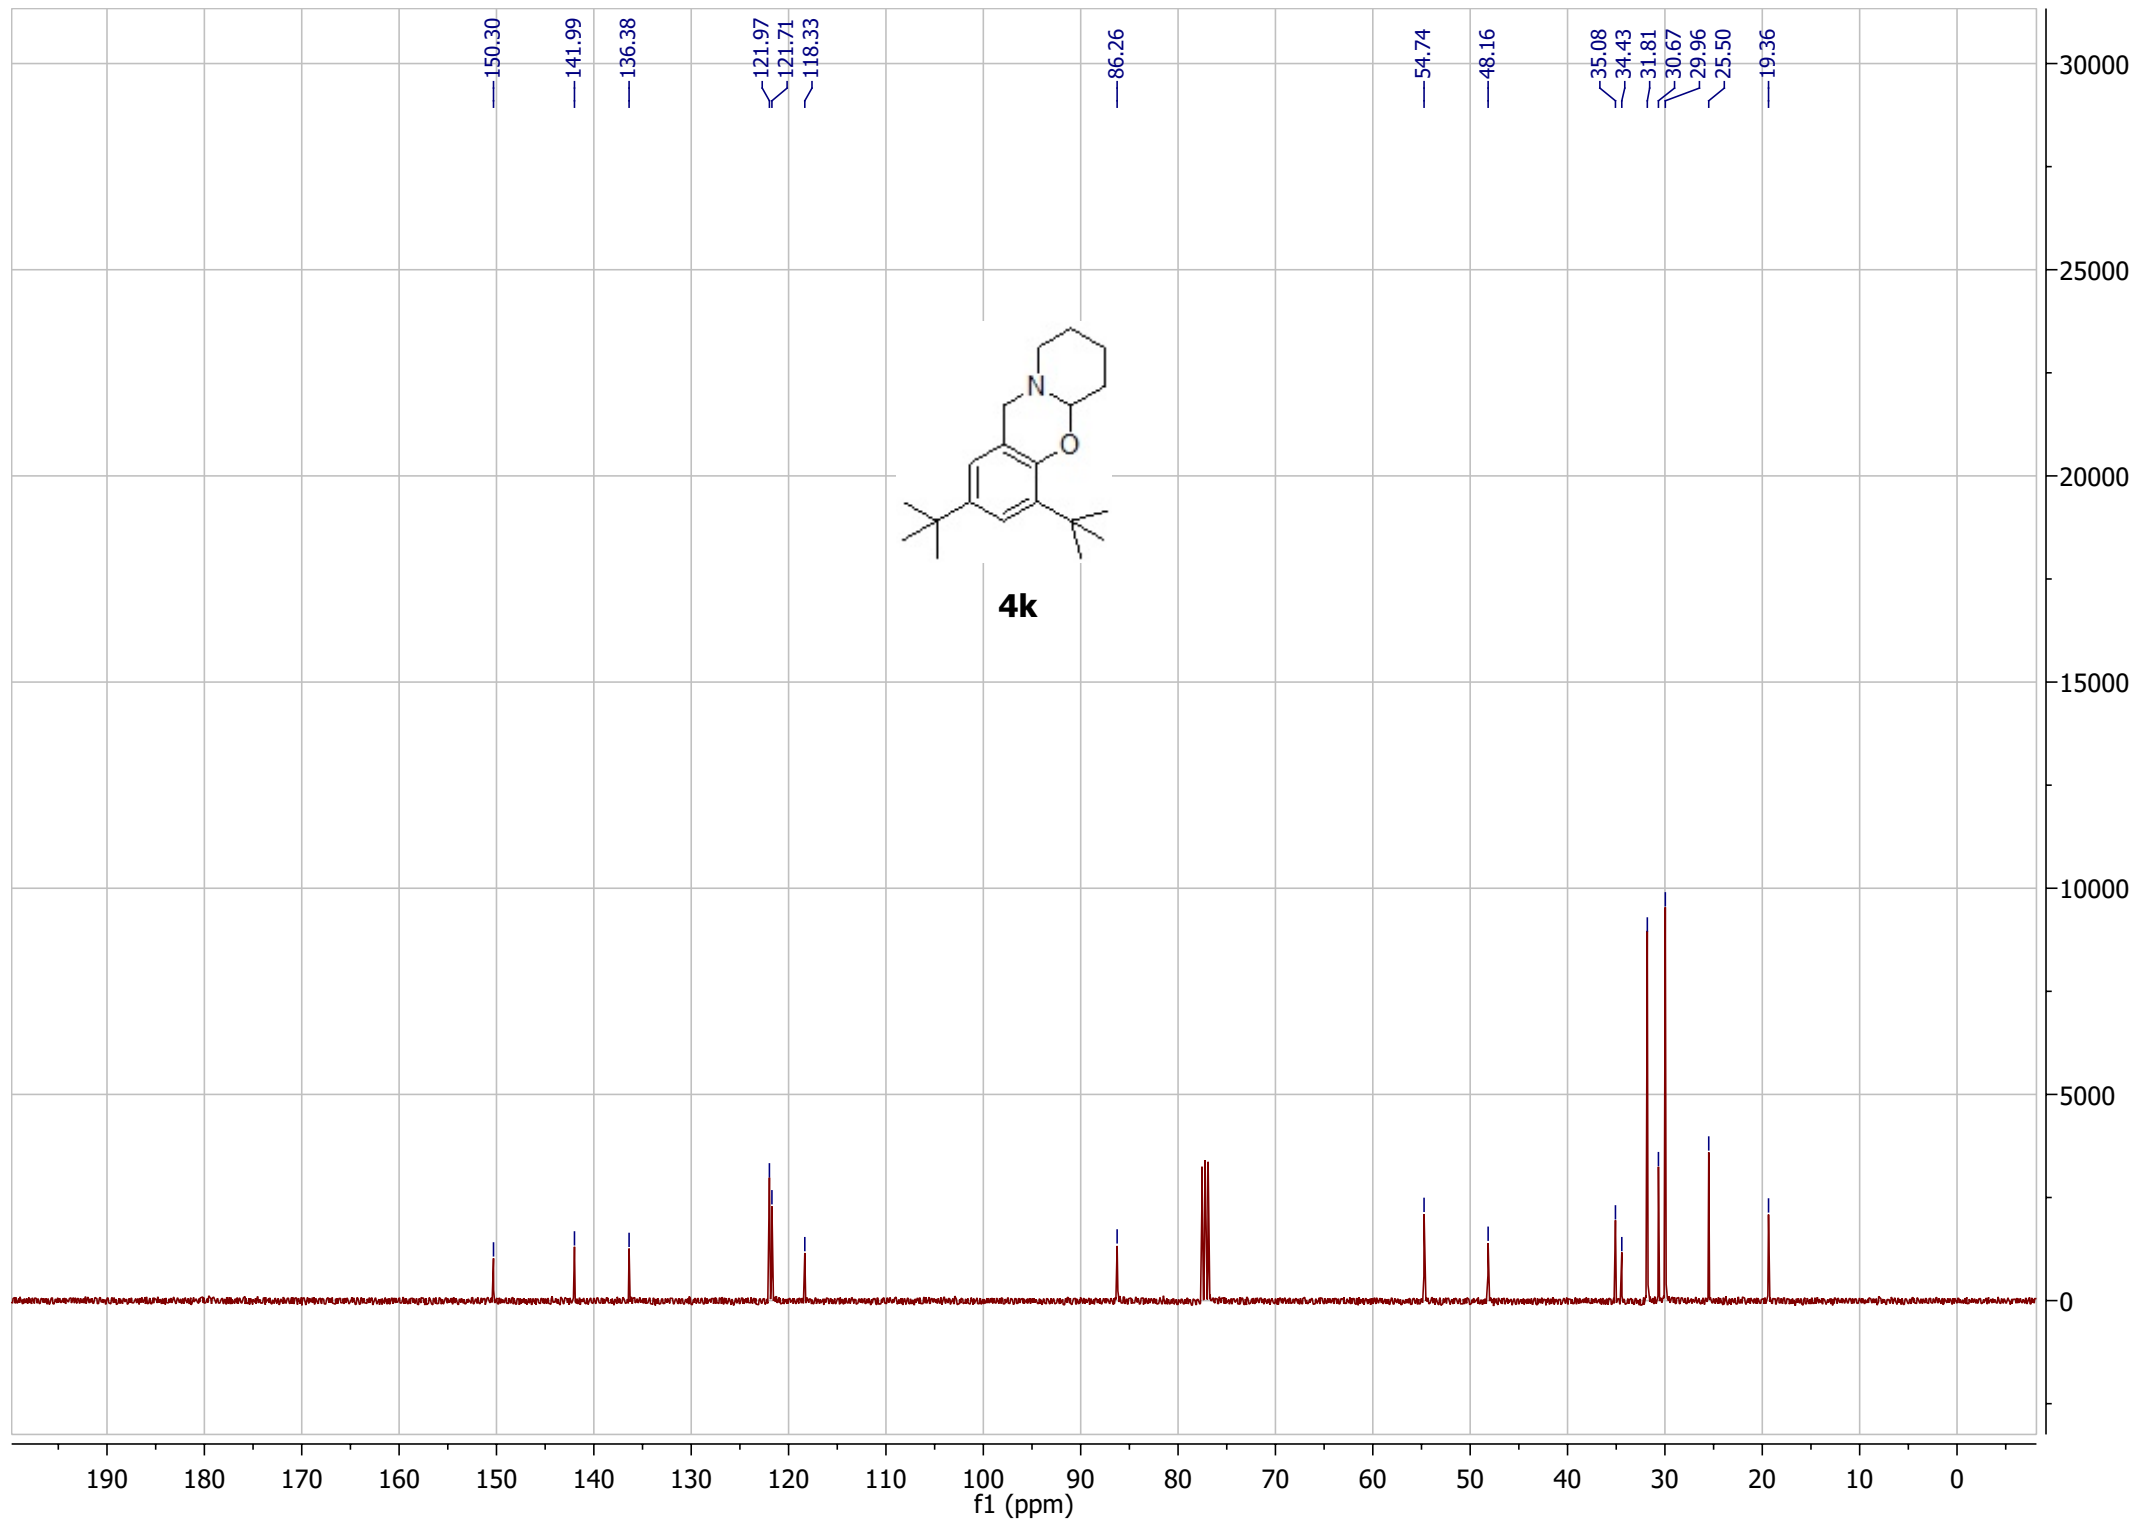



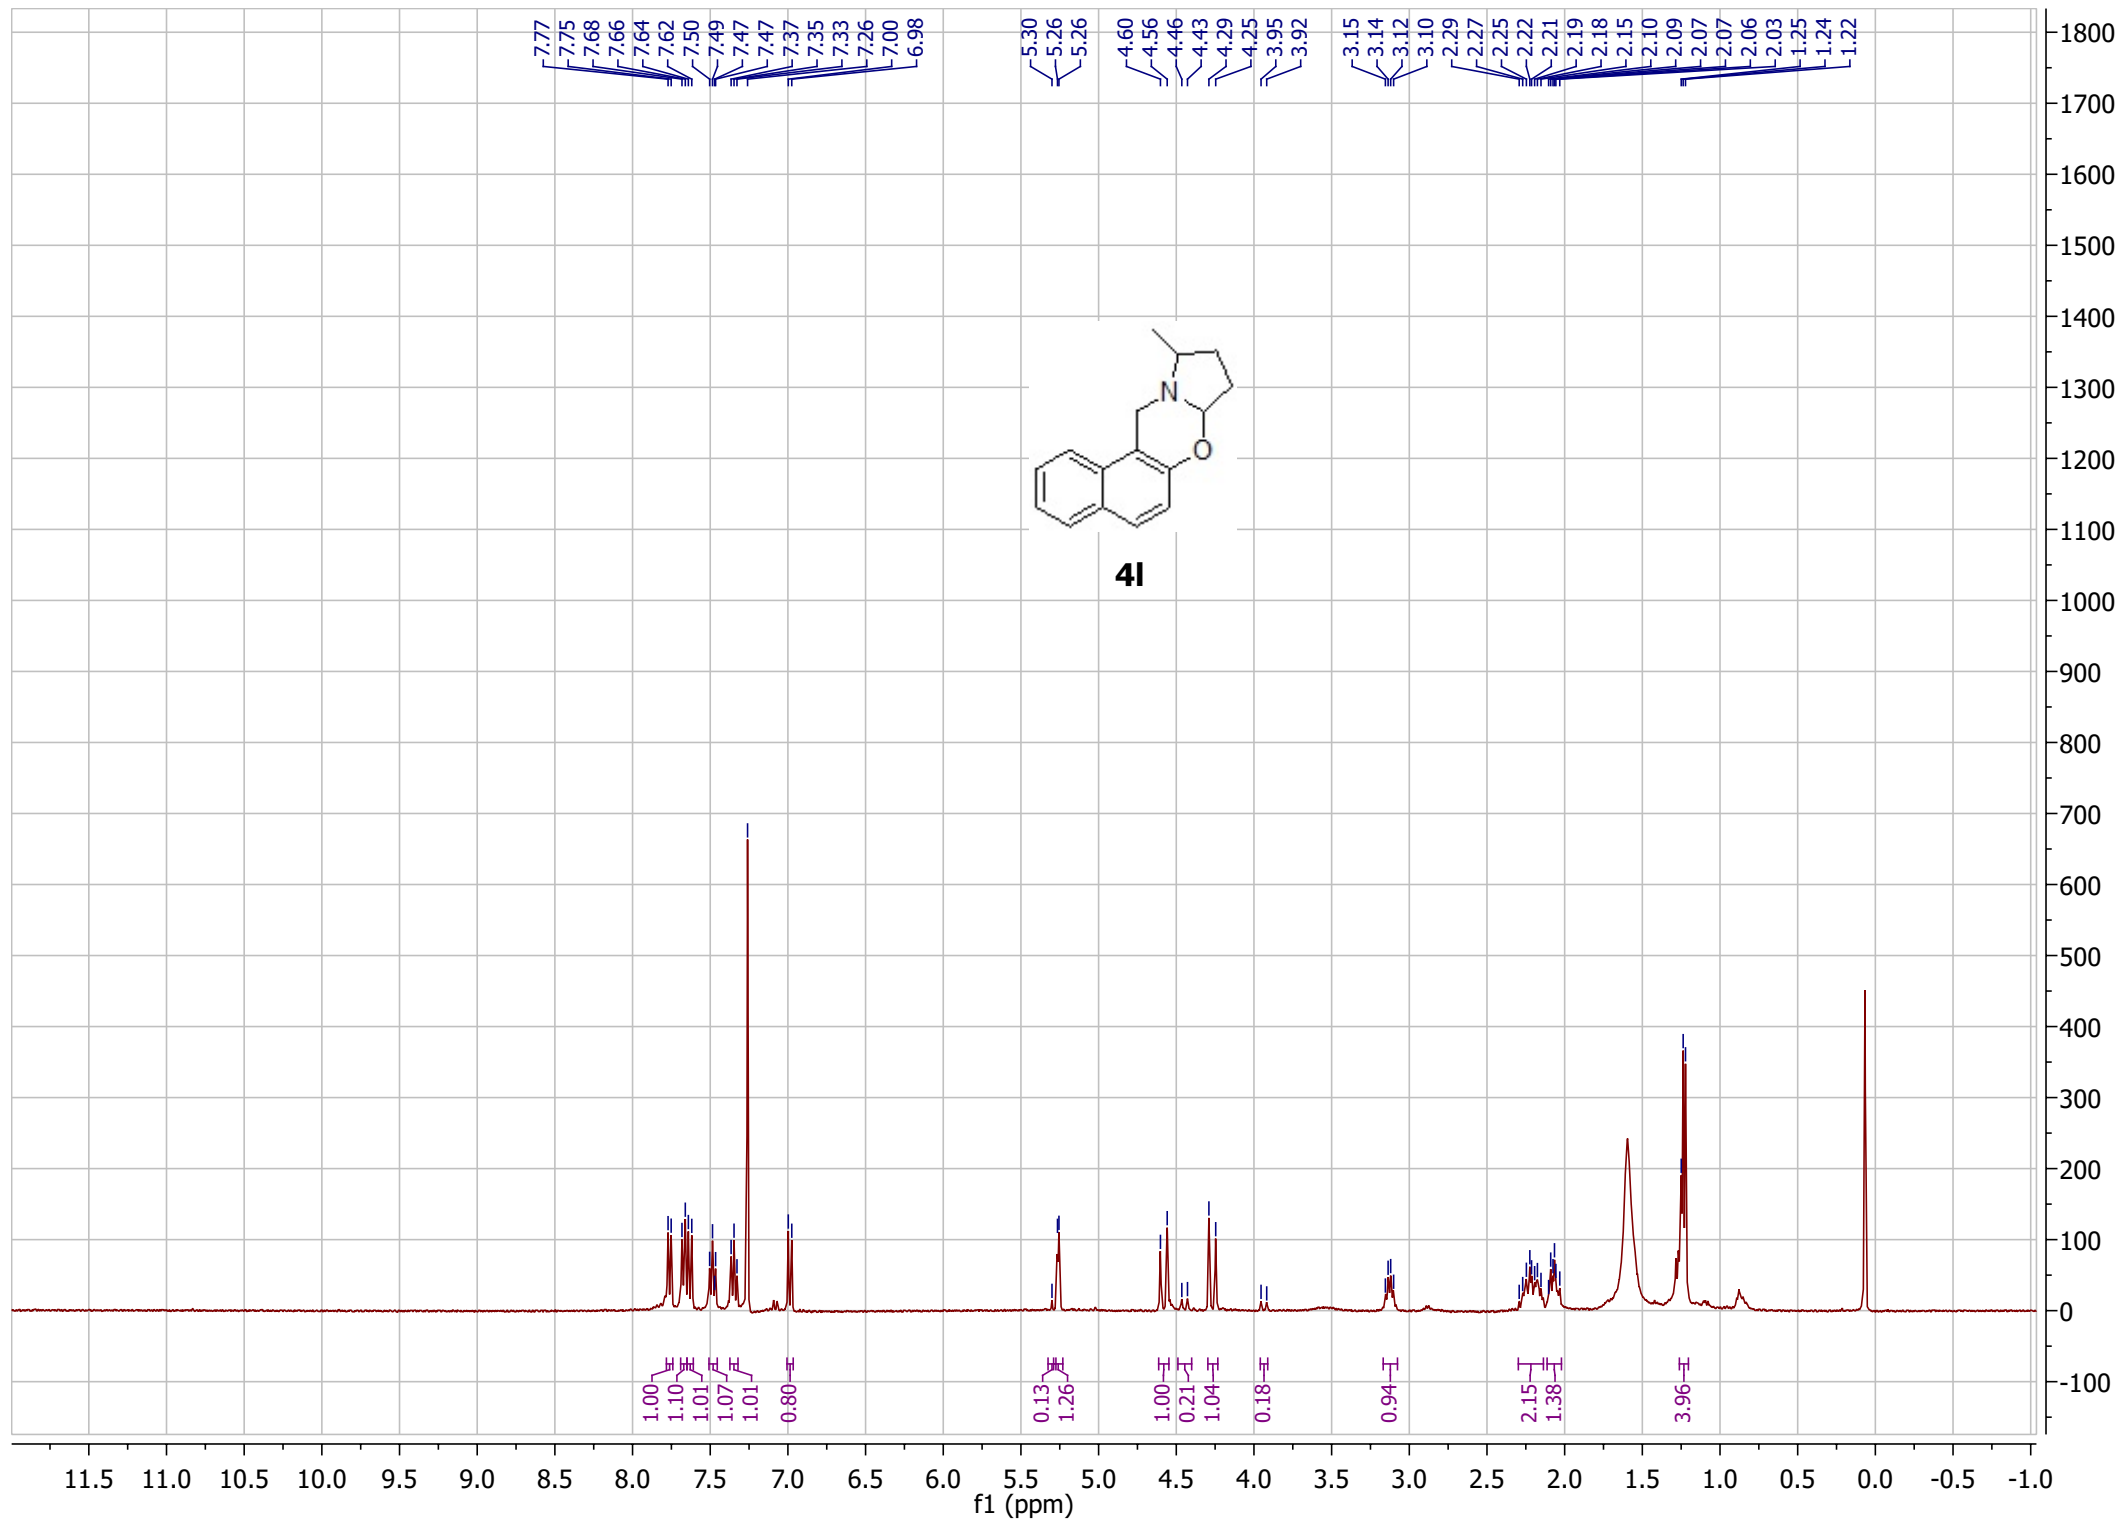

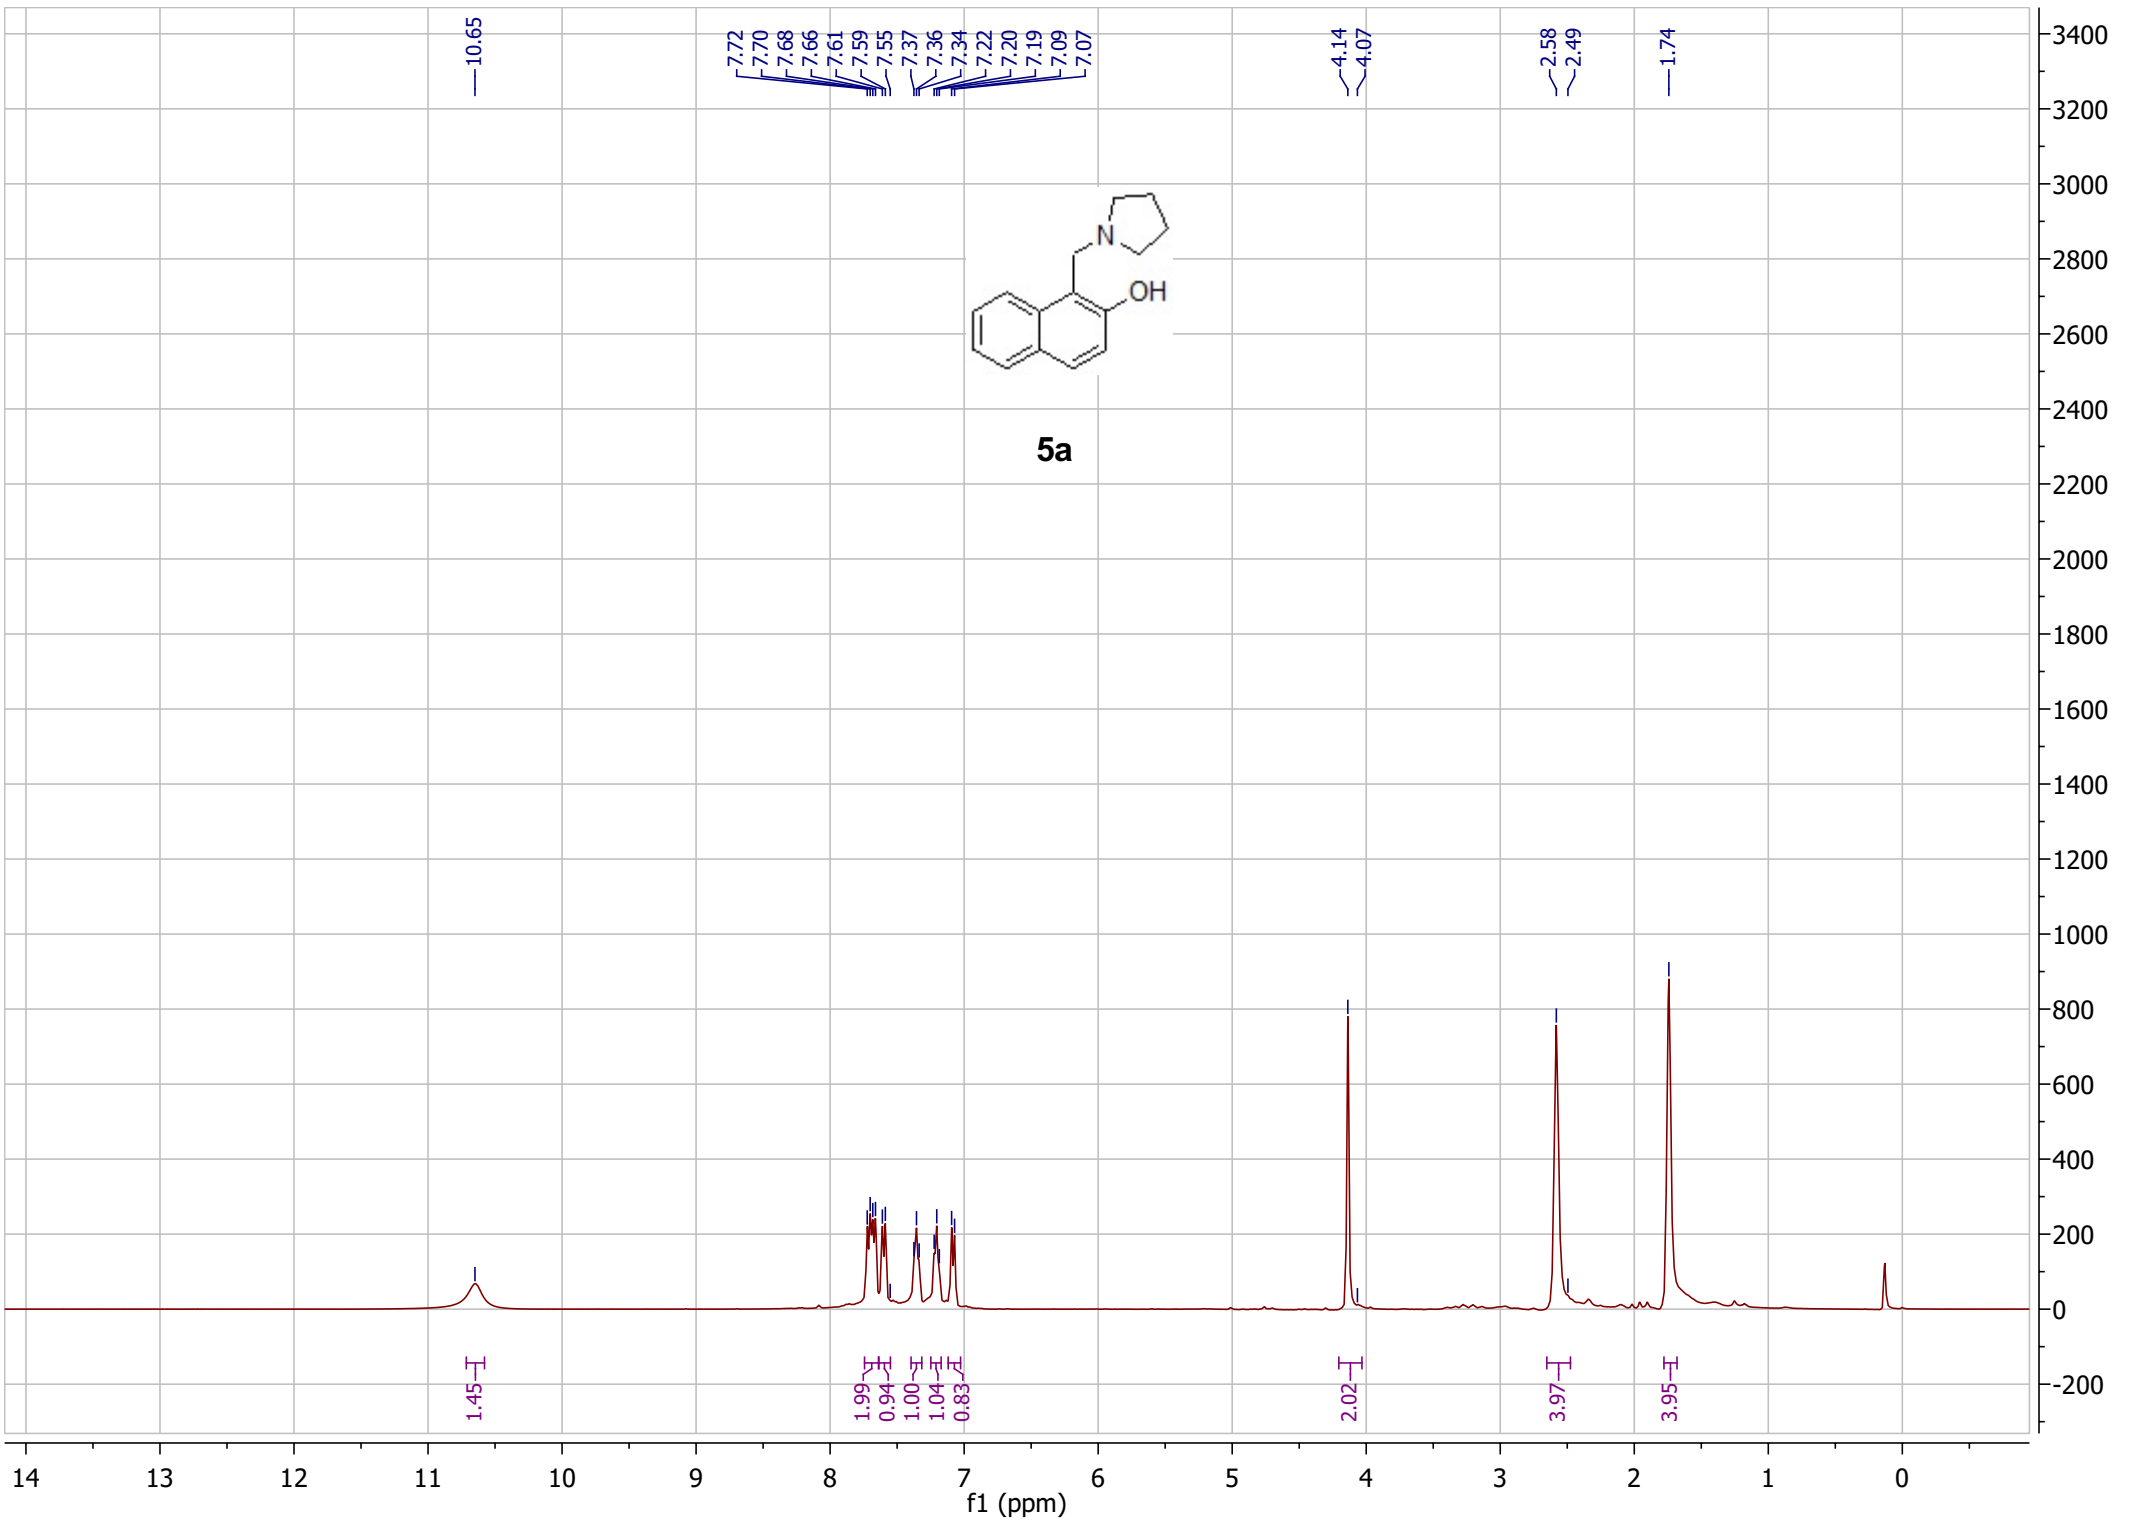

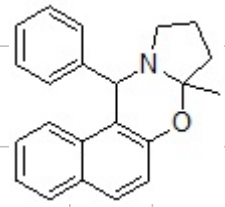

4m

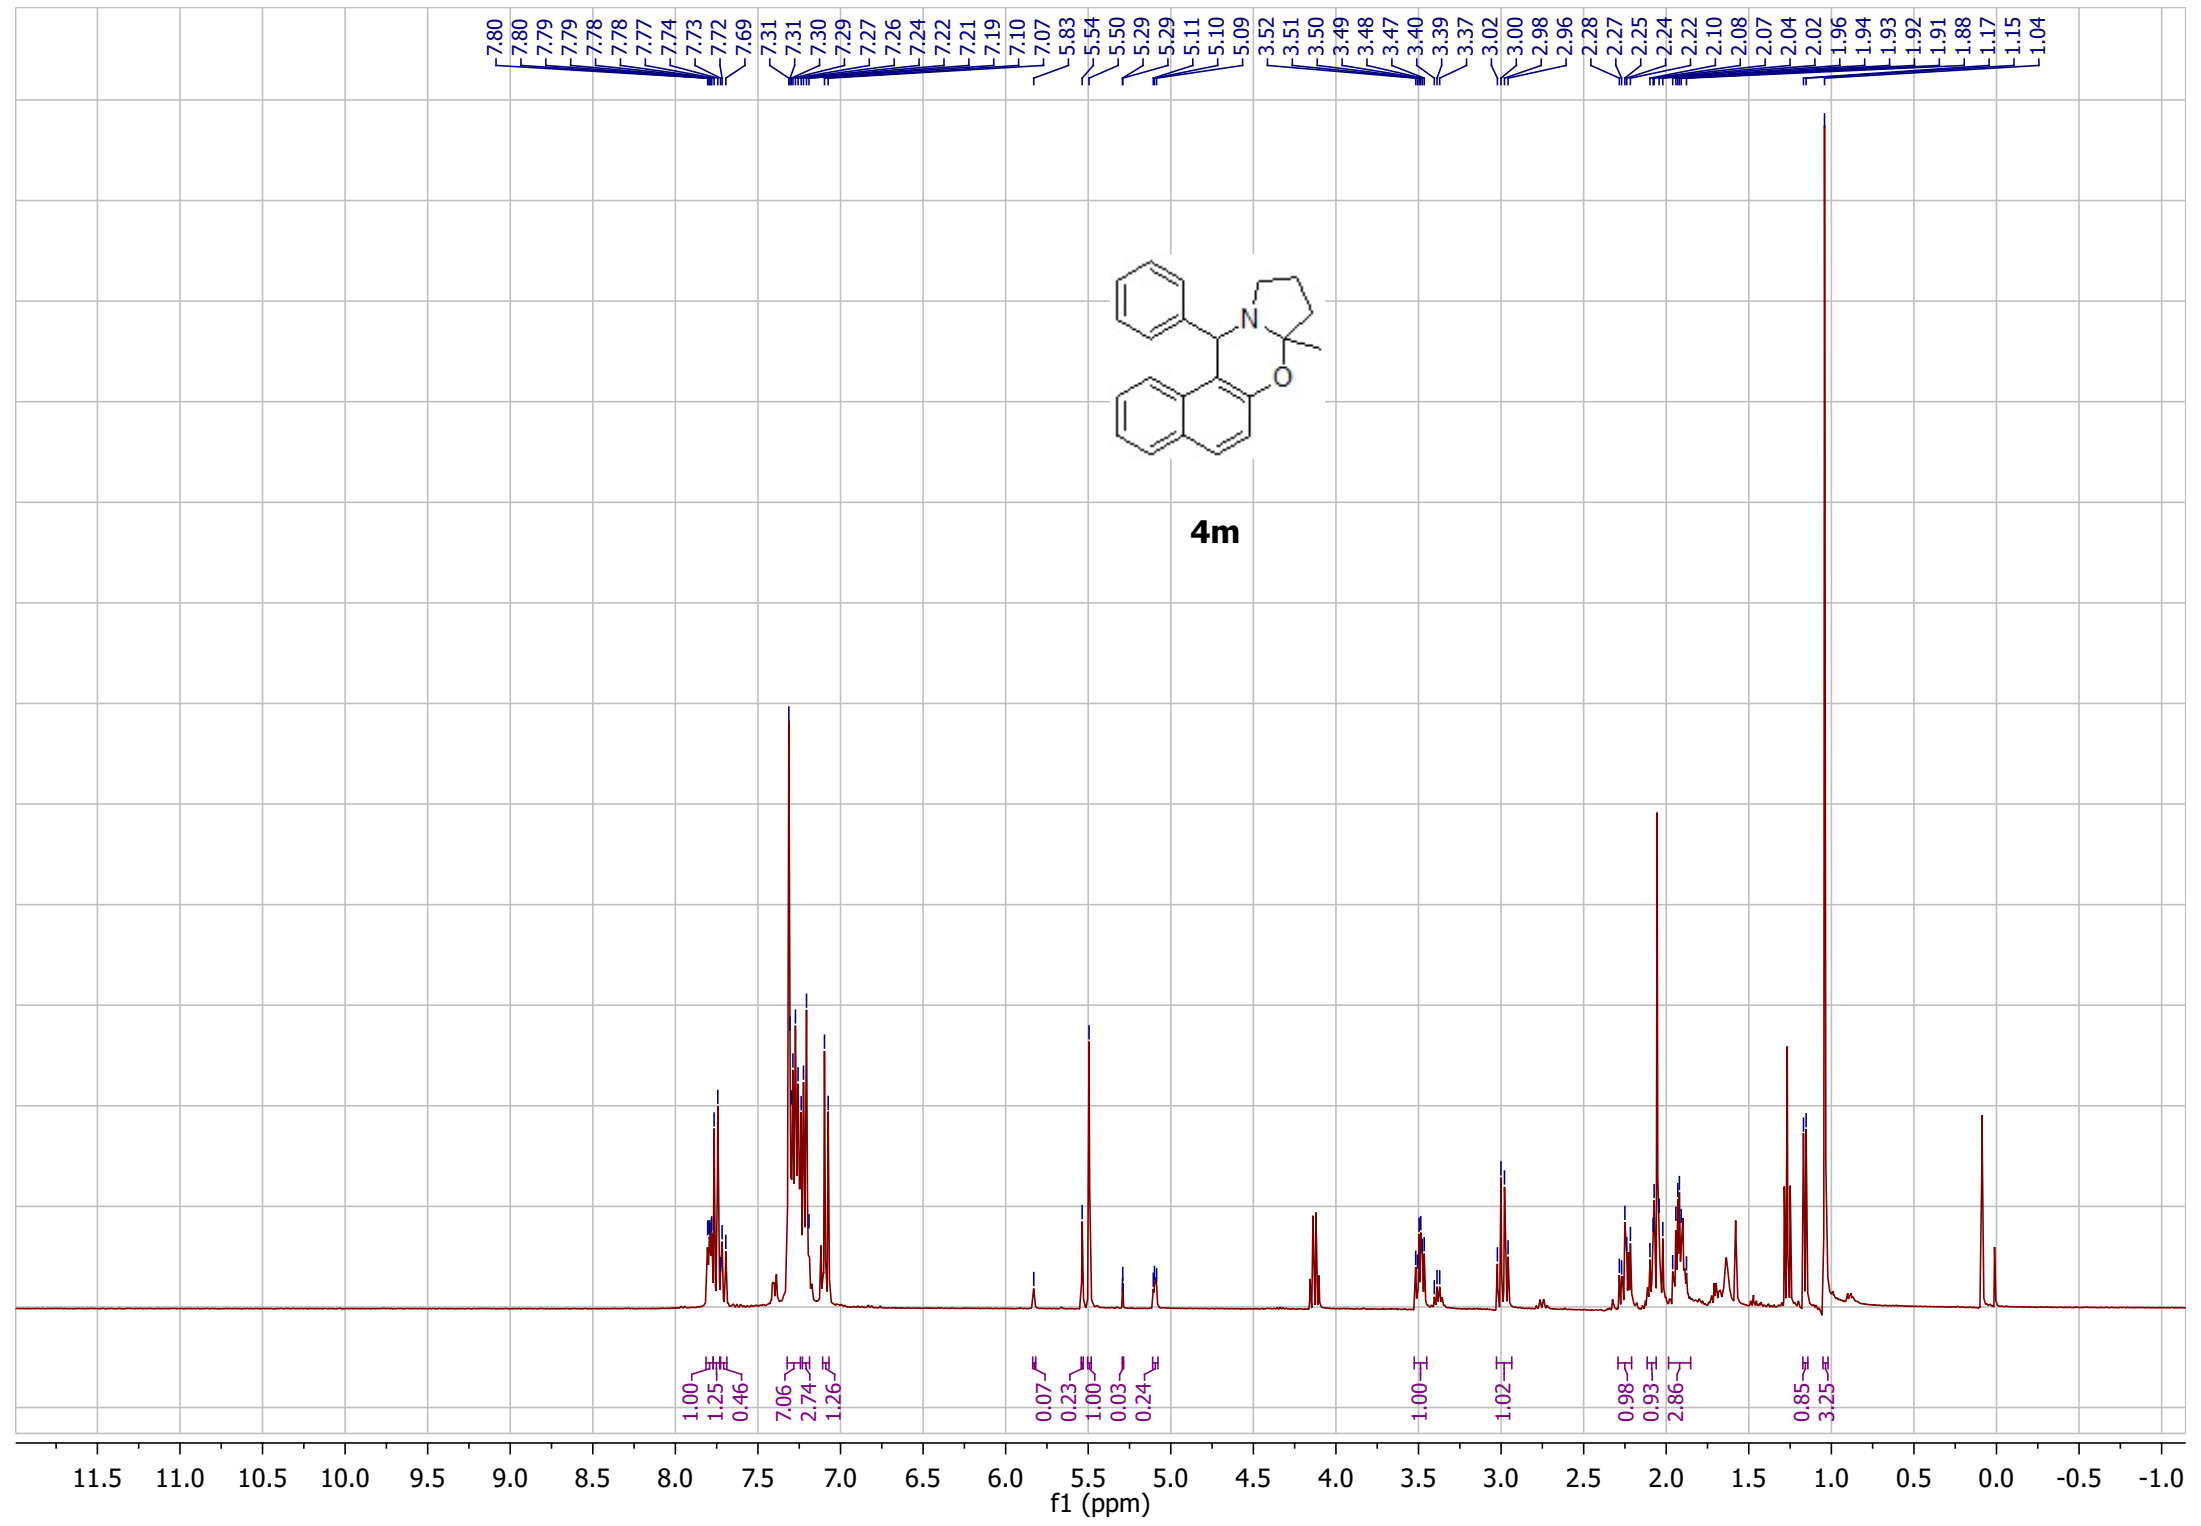

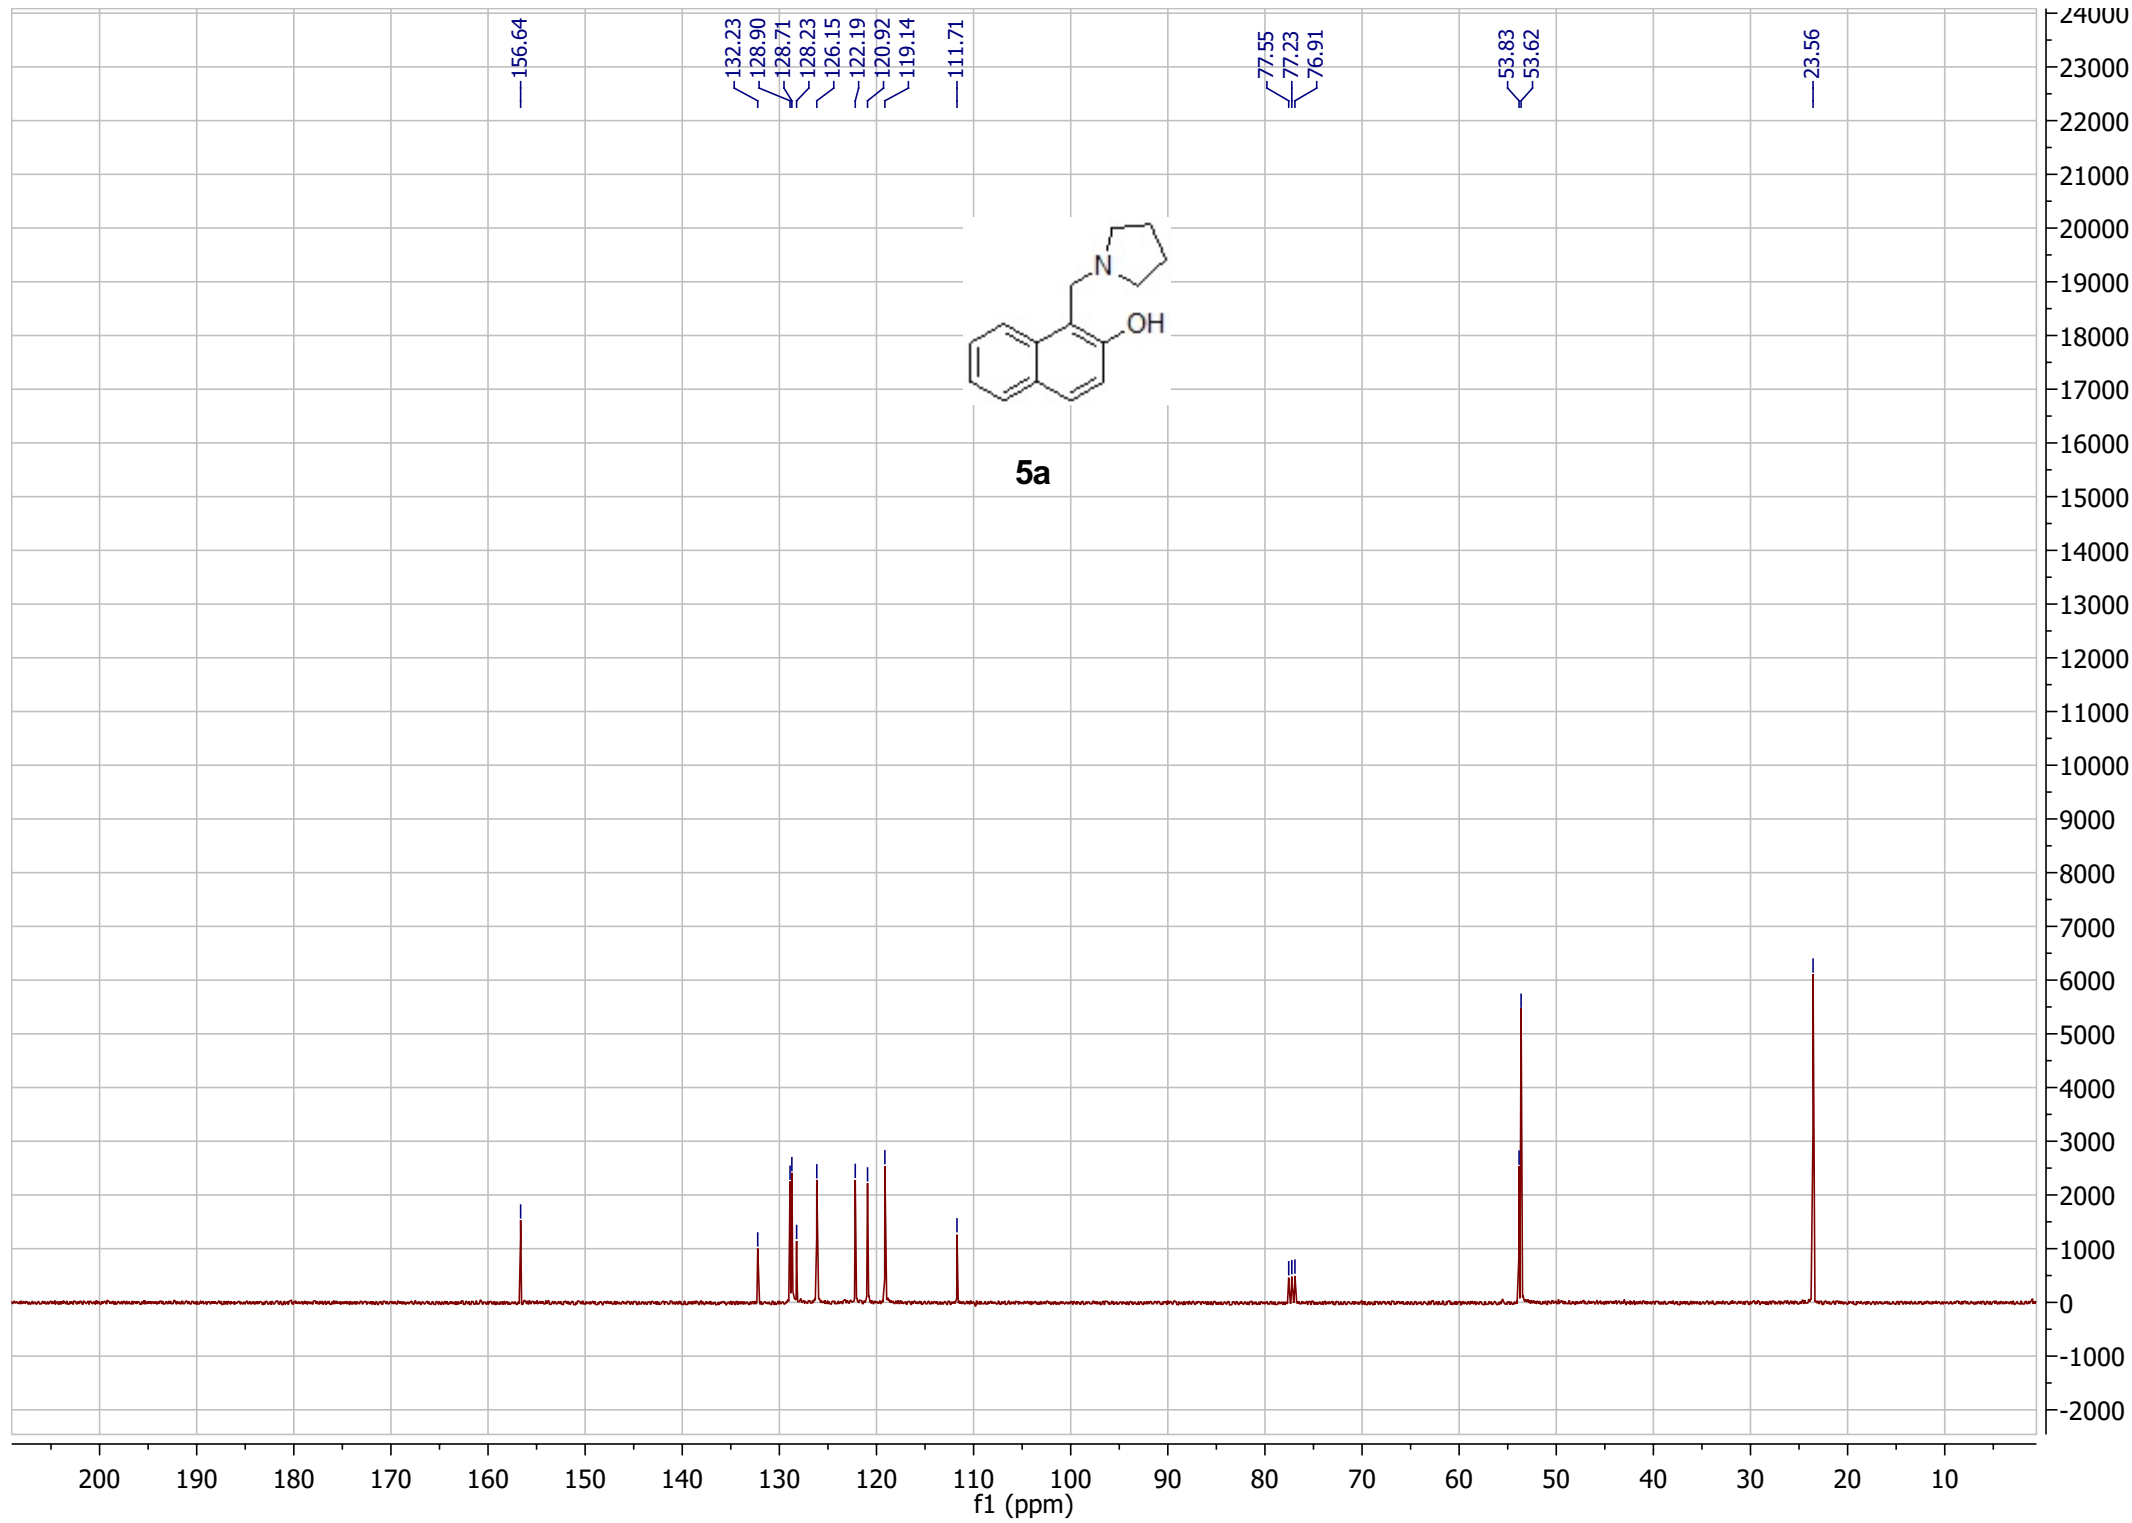

CKJ-AH-02-04

7.258  
7.164  
7.151  
7.138  
6.972  
6.960  
6.817  
6.804  
6.769  
6.757  
6.744

3.817

2.629

1.846

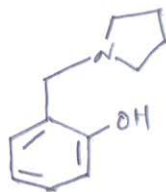

5b

Current Data Parameters  
NAME CKJ-AH-02-04  
EXPNO 1  
PROCNO 1

F2 - Acquisition Parameters  
Date\_ 20140409  
Time\_ 15.14  
INSTRUM spect  
PROBHD 5 mm PABBO BB/  
PULPROG zg30  
TD 32768  
SOLVENT CDC13  
NS 16  
DS 2  
SWH 12019.230 Hz  
FIDRES 0.366798 Hz  
AQ 1.3631488 sec  
RG 99.36  
DW 41.600 usec  
DE 6.50 usec  
TE 302.1 K  
D1 1.00000000 sec  
TD0 1

===== CHANNEL f1 =====  
SFO1 600.1737063 MHz  
NUC1 1H  
P1 12.00 usec  
PLW1 21.00000000 W

F2 - Processing parameters  
SI 16384  
SF 600.1700160 MHz  
WDW EM  
SSB 0  
LB 0.30 Hz  
GB 0  
PC 1.00

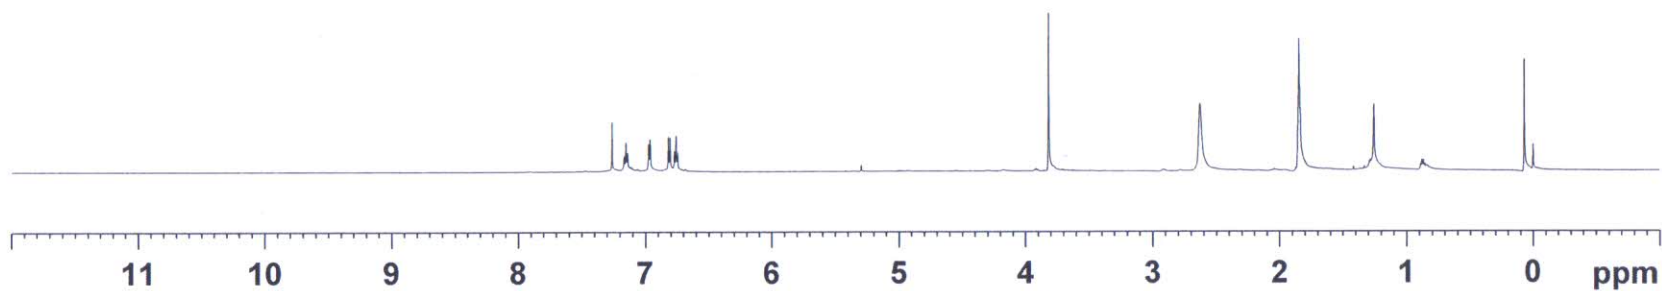

1.00  
1.00  
0.97  
1.07

2.01

4.07

4.01

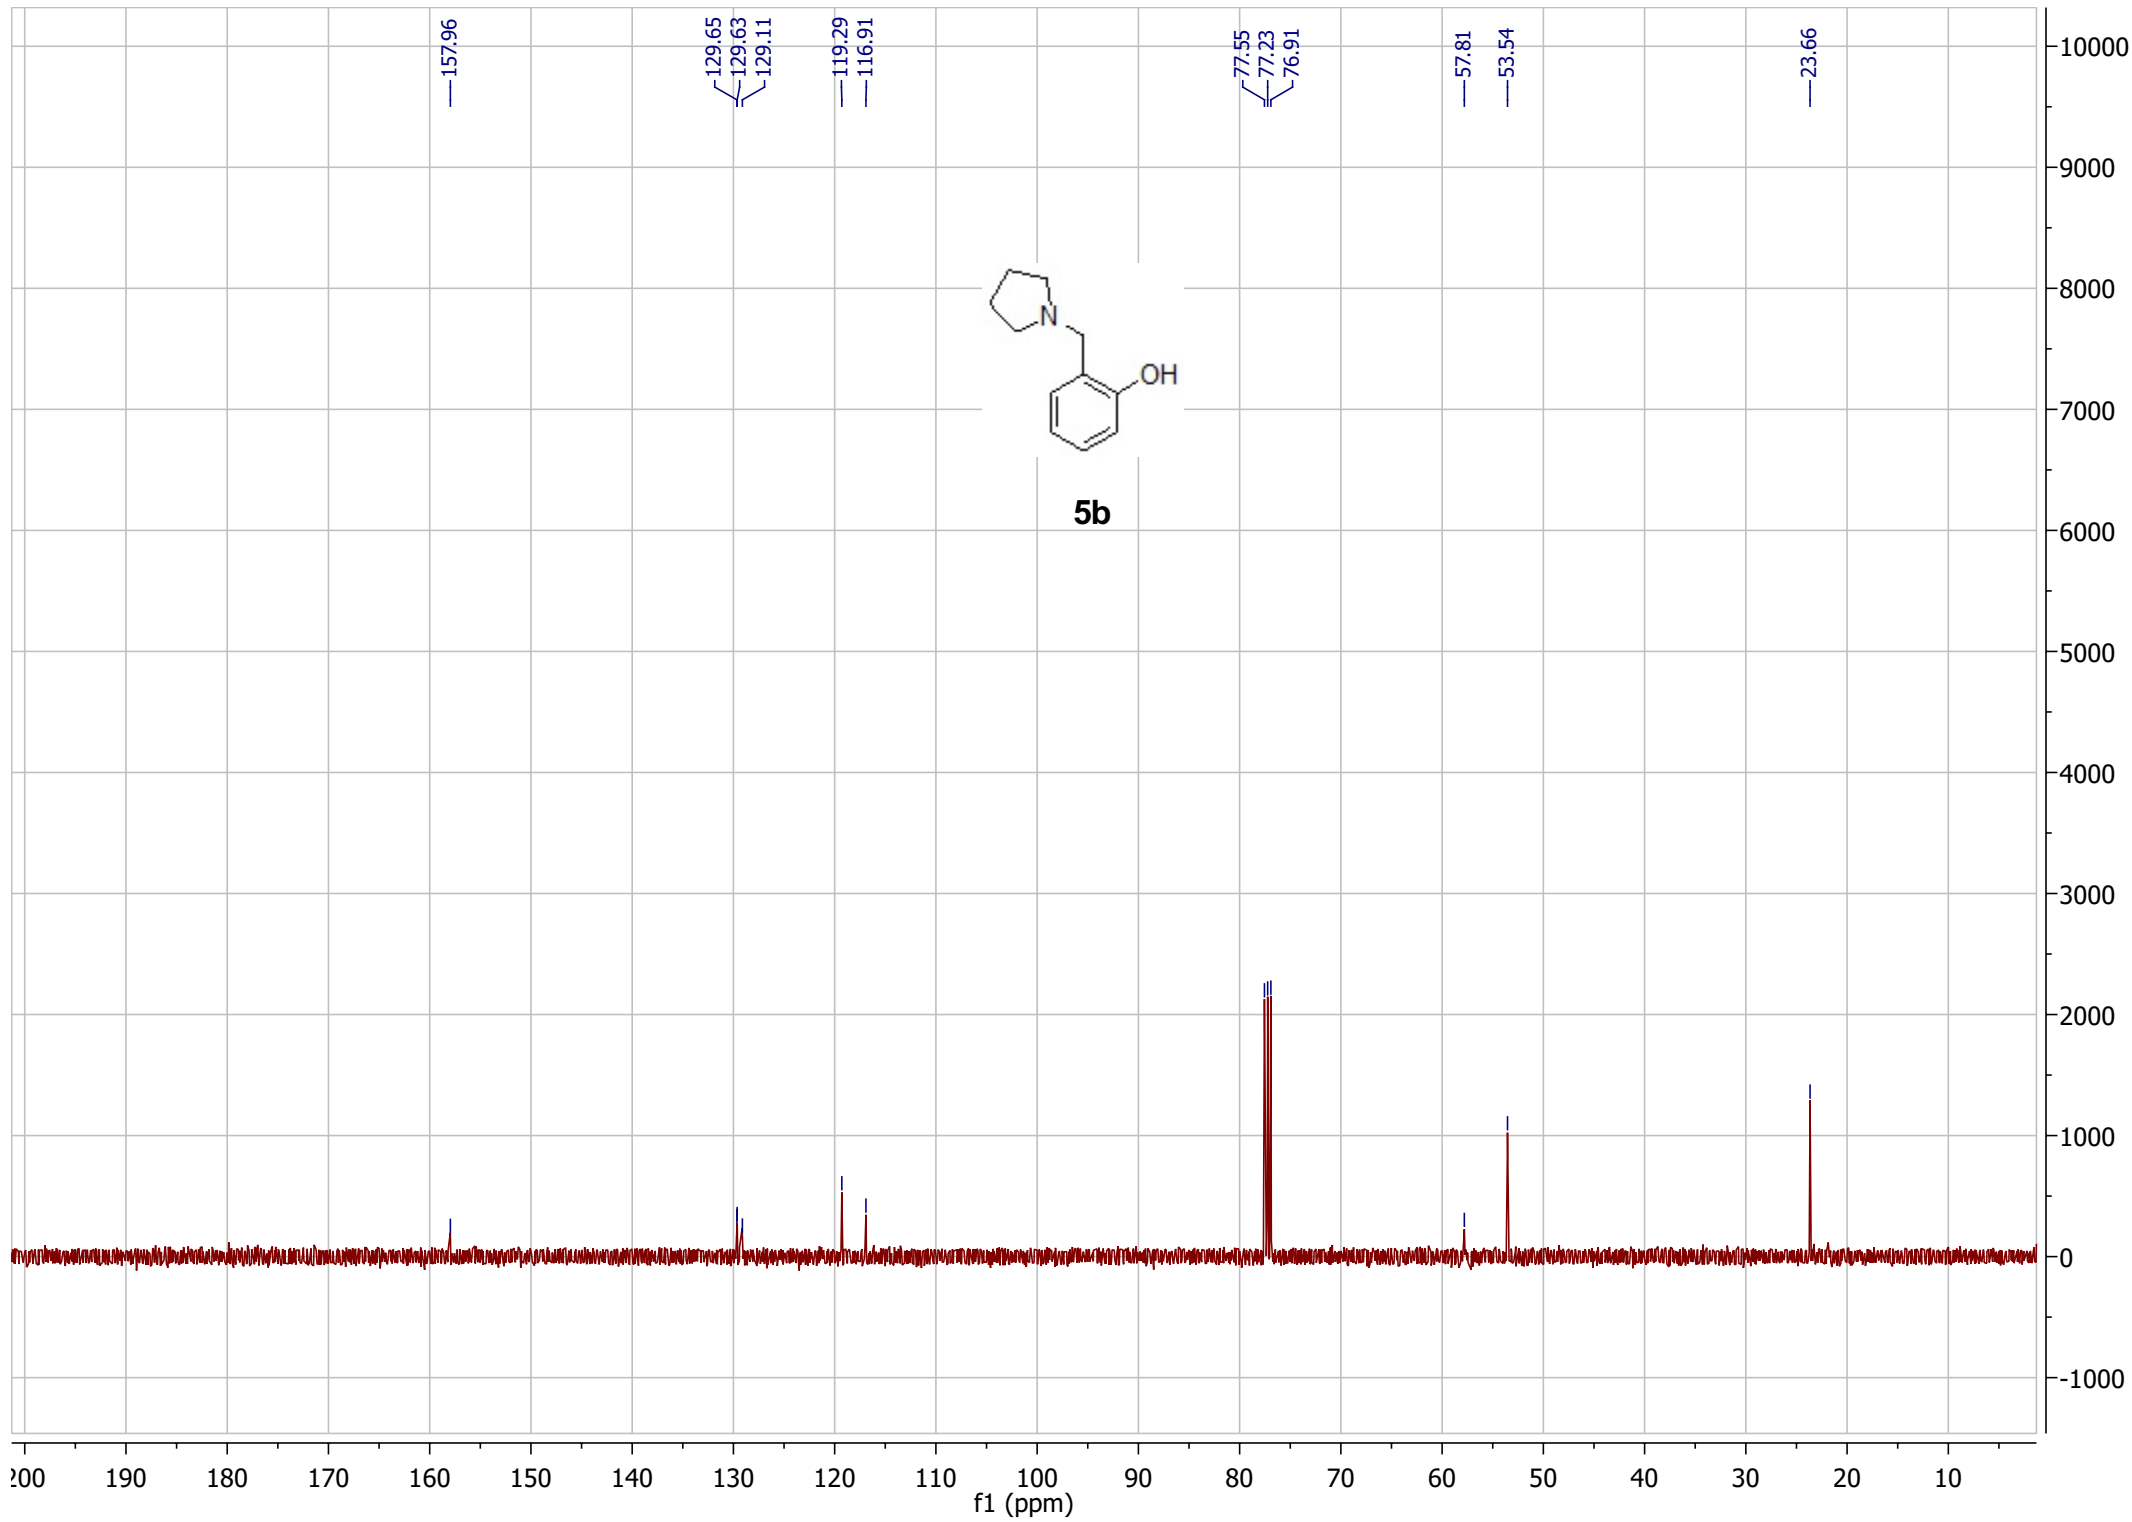

CKJ-AH-2-08B-1H

7.260  
7.215  
7.211  
6.842  
6.838

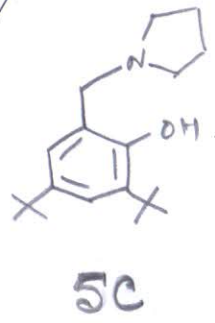

3.802

2.634

1.855  
1.850  
1.845  
1.434  
1.294

Current Data Parameters  
NAME CKJ-AH-2-08B-1H  
EXPNO 1  
PROCNO 1

F2 - Acquisition Parameters  
Date\_ 20140416  
Time 14.03  
INSTRUM spect  
PROBHD 5 mm PABBO BB/  
PULPROG zg30  
TD 32768  
SOLVENT CDCl3  
NS 16  
DS 2  
SWH 12019.230 Hz  
FIDRES 0.366798 Hz  
AQ 1.3631488 sec  
RG 27.82  
DW 41.600 usec  
DE 6.50 usec  
TE 301.4 K  
D1 1.00000000 sec  
TD0 1

==== CHANNEL f1 =====  
SFO1 600.1737063 MHz  
NUC1 1H  
P1 12.00 usec  
PLW1 21.00000000 W

F2 - Processing parameters  
SI 16384  
SF 600.1700141 MHz  
WDW EM  
SSB 0  
LB 0.30 Hz  
GB 0  
PC 1.00

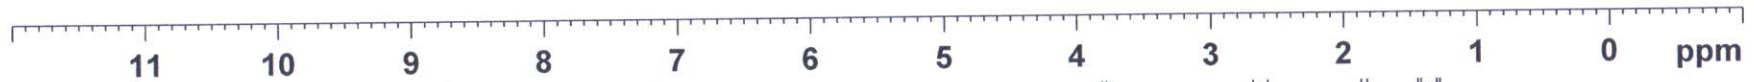

1.00  
1.00

2.06

4.01

4.12

9.12  
9.18

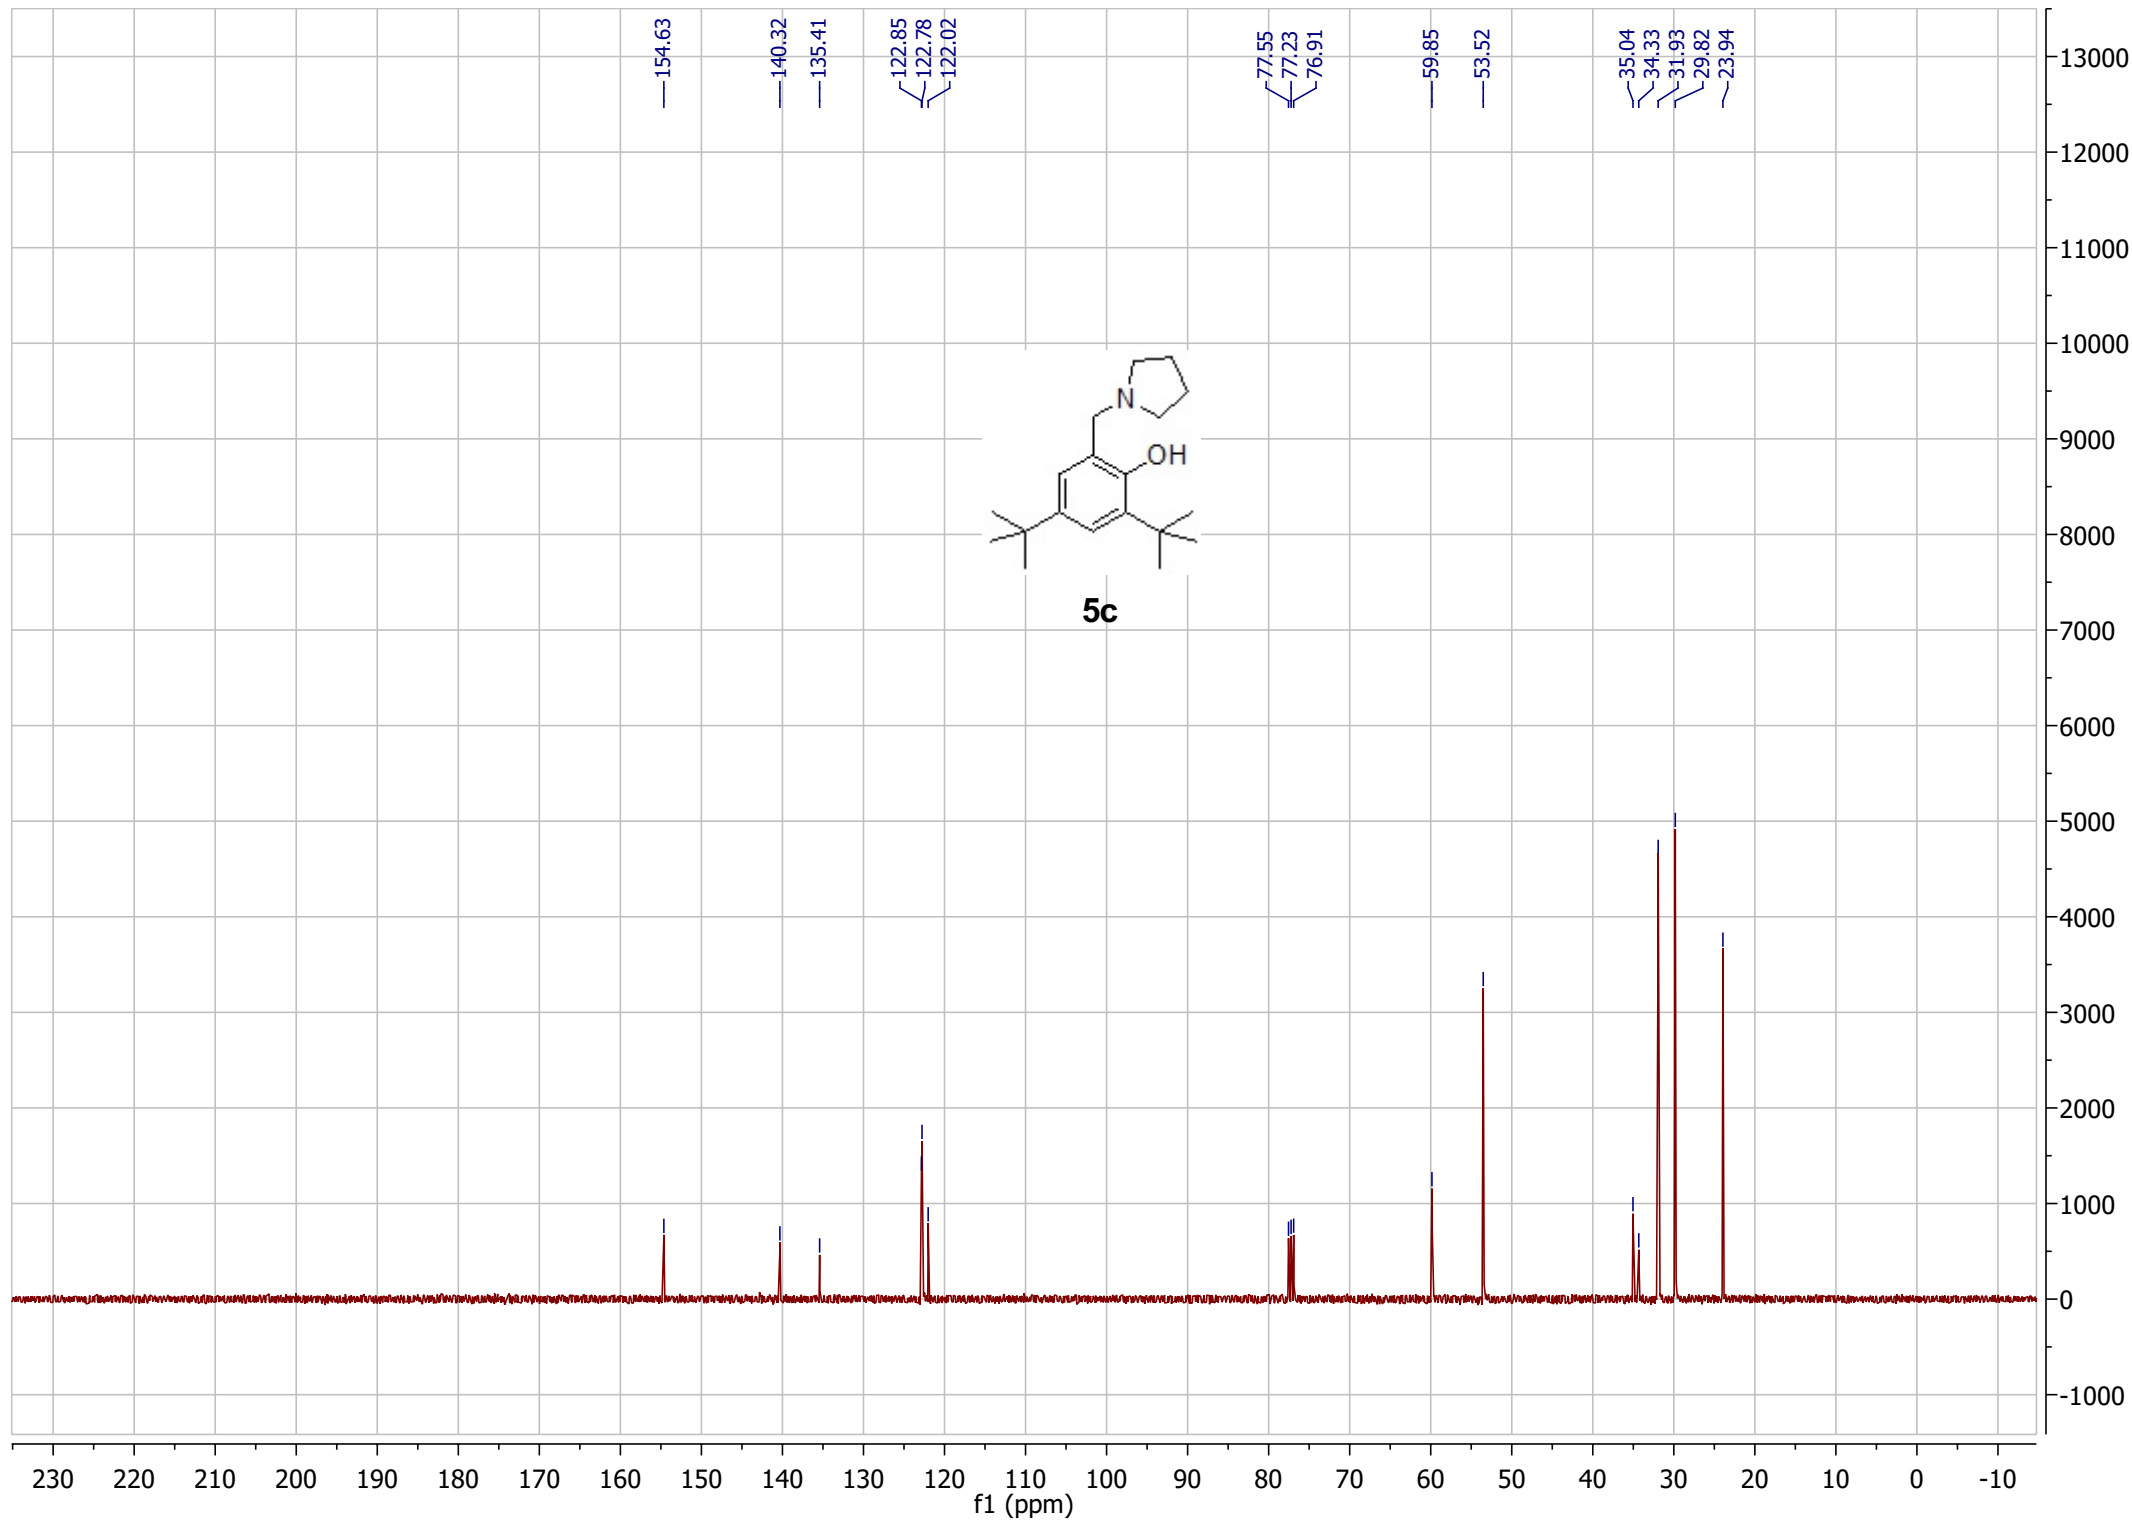



CKJ-AH-2-09D1- 1H

7.261  
6.807  
6.794  
6.732  
6.719  
6.706  
6.614  
6.602

3.872  
3.840

2.647

1.848  
1.843  
1.838

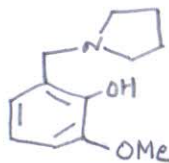

5d

Current Data Parameters  
NAME CKJ-AH-2-09D1- 1H  
EXPNO 1  
PROCNO 1

F2 - Acquisition Parameters  
Date\_ 20140509  
Time 15.35  
INSTRUM spect  
PROBHD 5 mm PABBO BB/  
PULPROG zg30  
TD 32768  
SOLVENT CDC13  
NS 16  
DS 2  
SWH 12019.230 Hz  
FIDRES 0.366798 Hz  
AQ 1.3631488 sec  
RG 113  
DW 41.600 usec  
DE 6.50 usec  
TE 299.0 K  
D1 1.00000000 sec  
TDO 1

==== CHANNEL f1 =====  
SFO1 600.1737063 MHz  
NUC1 1H  
P1 12.00 usec  
PLW1 21.00000000 W

F2 - Processing parameters  
SI 16384  
SF 600.1700145 MHz  
WDW EM  
SSB 0  
LB 0.30 Hz  
GB 0  
PC 1.00

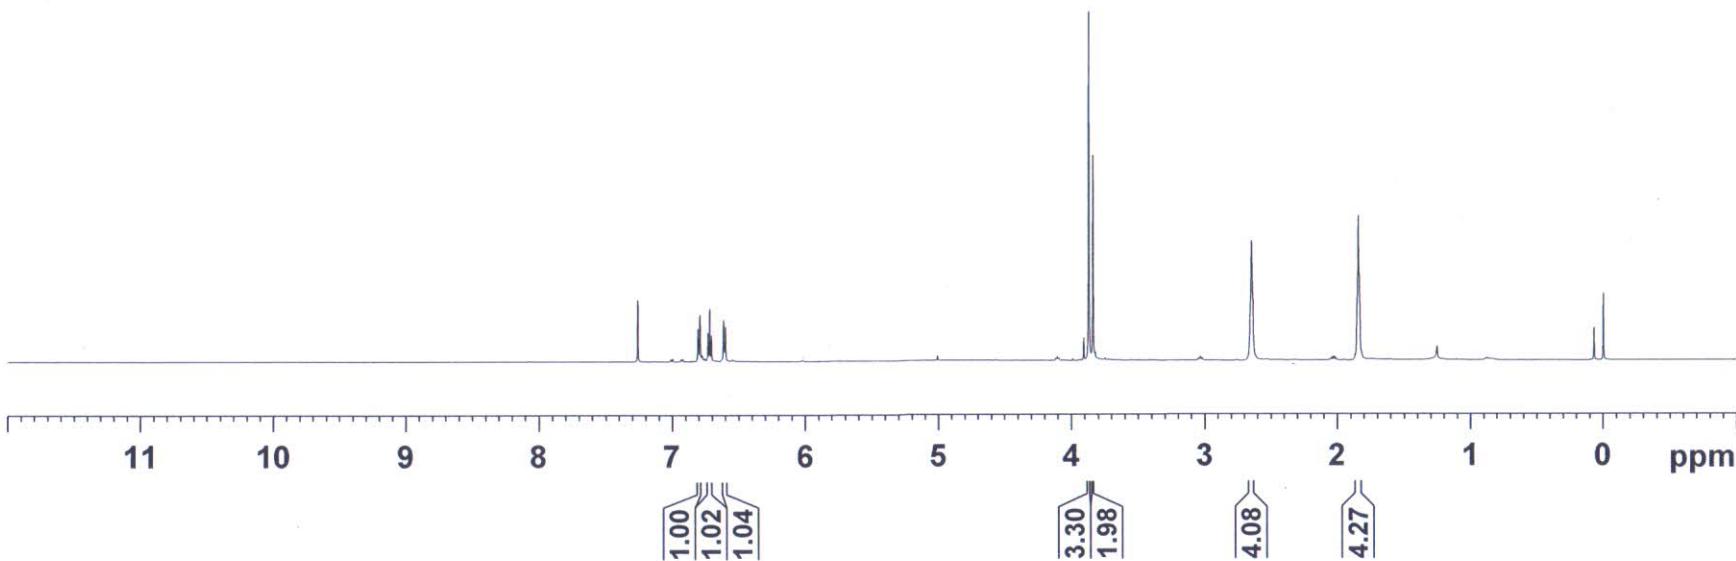

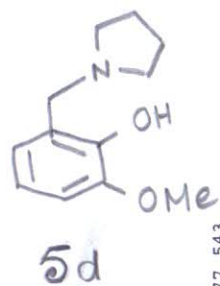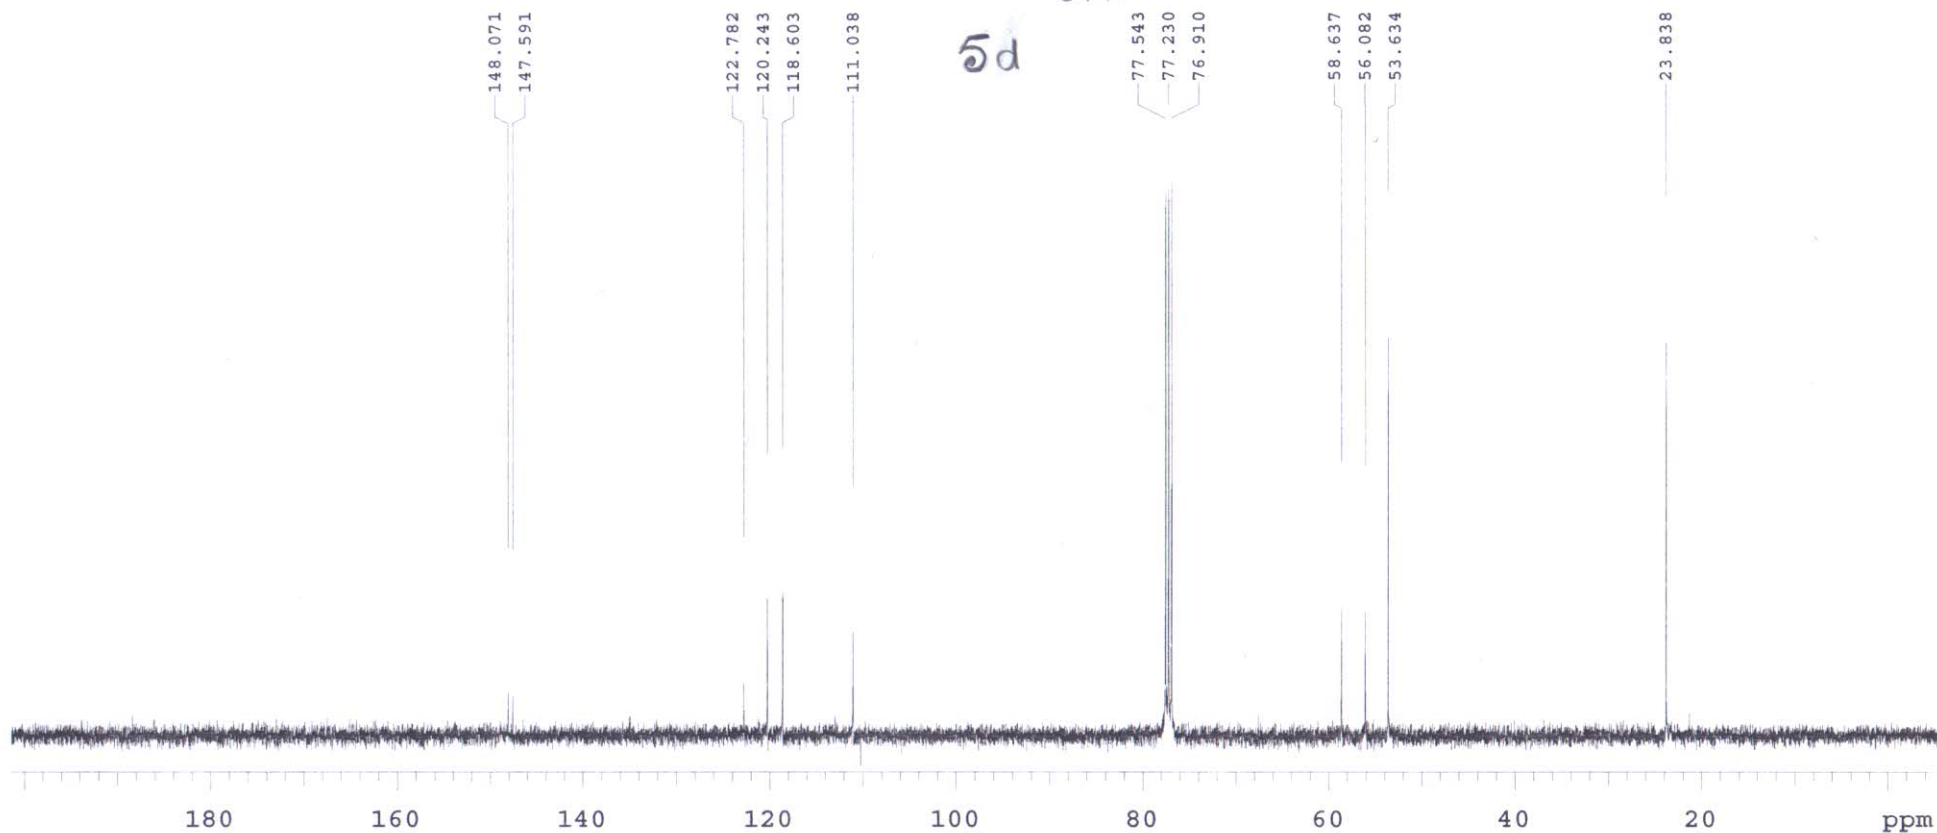

|                                                                                                                              |                                                                                                                |                                                                                     |                                                                                                           |
|------------------------------------------------------------------------------------------------------------------------------|----------------------------------------------------------------------------------------------------------------|-------------------------------------------------------------------------------------|-----------------------------------------------------------------------------------------------------------|
| PULSE SEQUENCE<br>Relax delay 1.000 sec<br>Pulse 45.0 degrees<br>Acq. time 1.304 sec<br>Width 25125.6 Hz<br>2044 repetitions | OBSERVE C13, 100.5425817<br>DECOUPLE H1, 399.8529994<br>Power 42.0 dB<br>continuously on<br>WALTZ-16 modulated | DATA PROCESSING<br>Line broadening 0.5 Hz<br>FT size 65536<br>Total time 78 minutes | CKJ-AH-2-09D2-13C<br>Solvent: cdcl3<br>Temp. 25.0 C / 298.1 K<br>Operator: chem<br>Mercury-400 "IITG-NMR" |
|------------------------------------------------------------------------------------------------------------------------------|----------------------------------------------------------------------------------------------------------------|-------------------------------------------------------------------------------------|-----------------------------------------------------------------------------------------------------------|

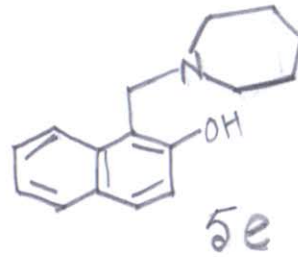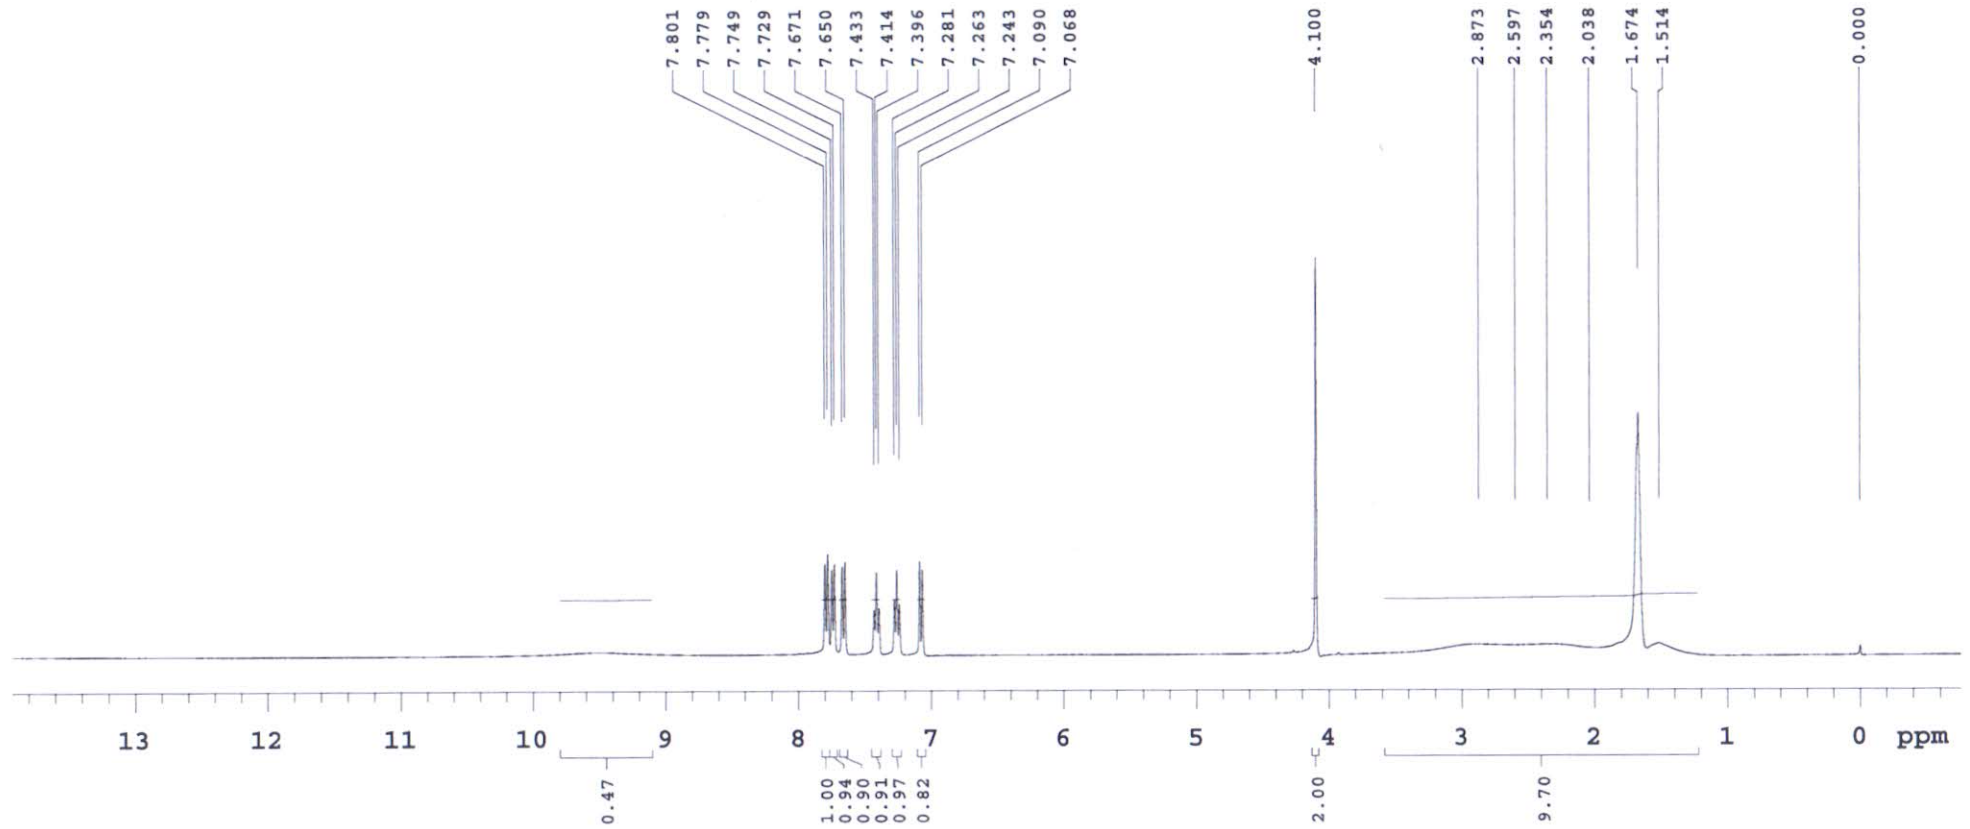

PULSE SEQUENCE  
 Relax. delay 1.000 sec  
 Pulse 45.0 degrees  
 Acq. time 2.561 sec  
 Width 8000.0 Hz  
 32 repetitions

OBSERVE H1, 399.8509714

DATA PROCESSING  
 FT size 65536  
 Total time 1 minutes

CKJ-AH-2-11

Solvent: cdcl3  
 Temp. 25.0 C / 298.1 K  
 Operator: chem  
 File: CKJ-AH-2-11  
 Mercury-400 "IITG-NMR"

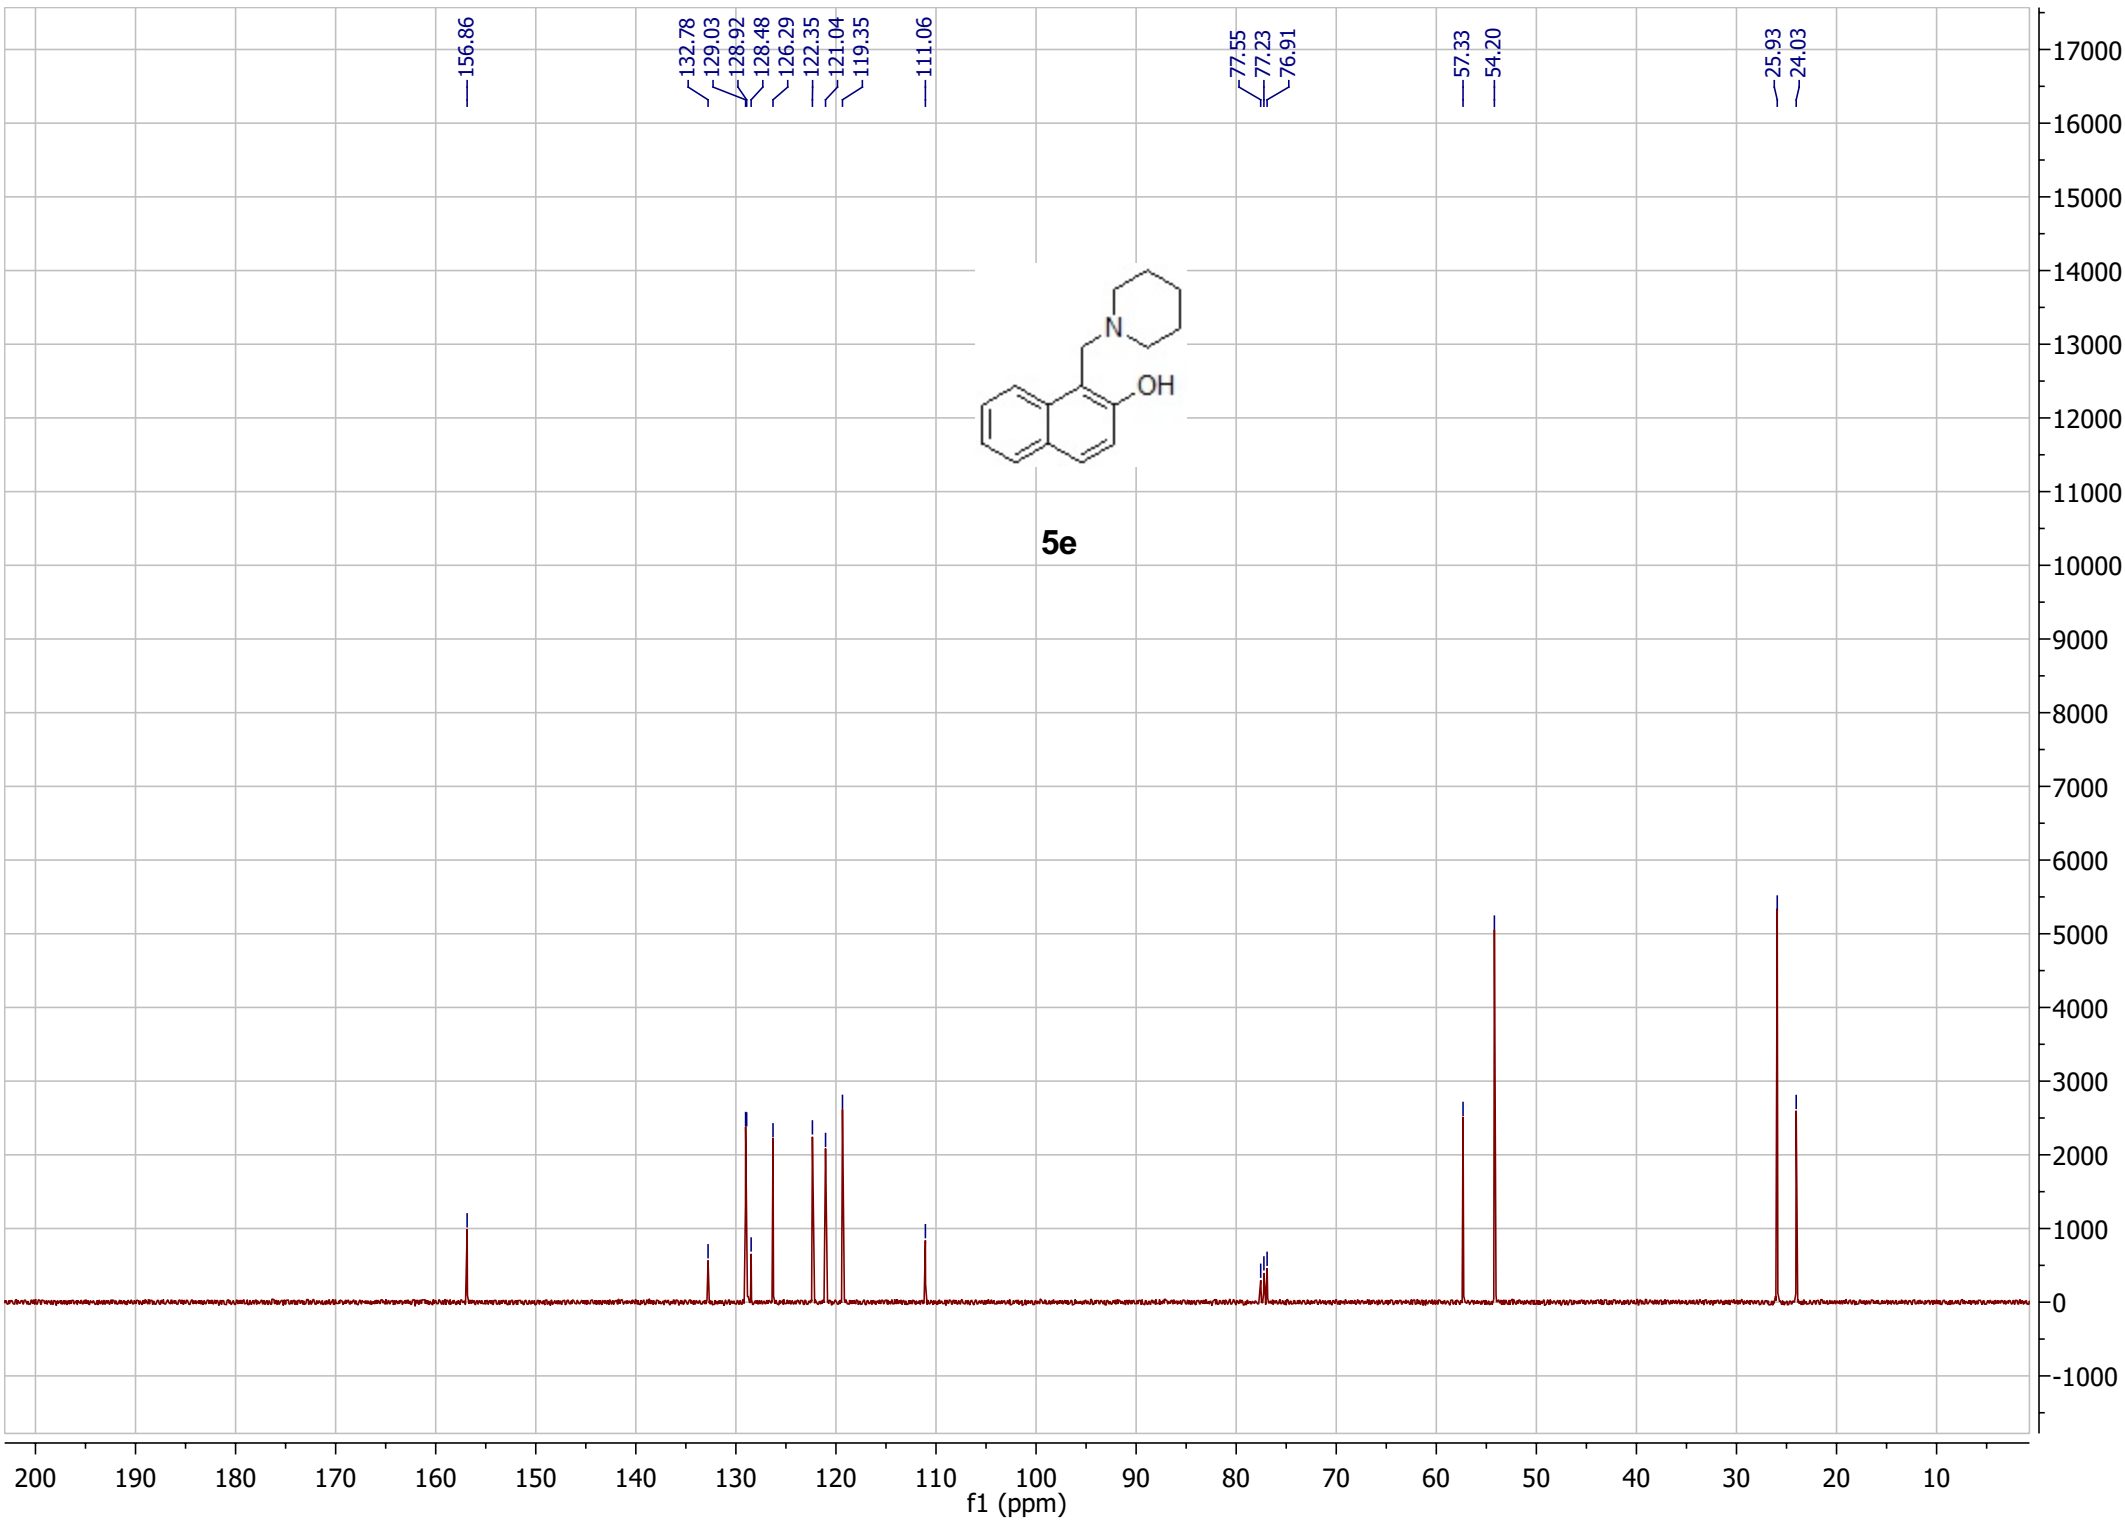

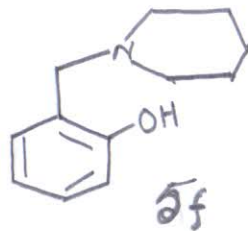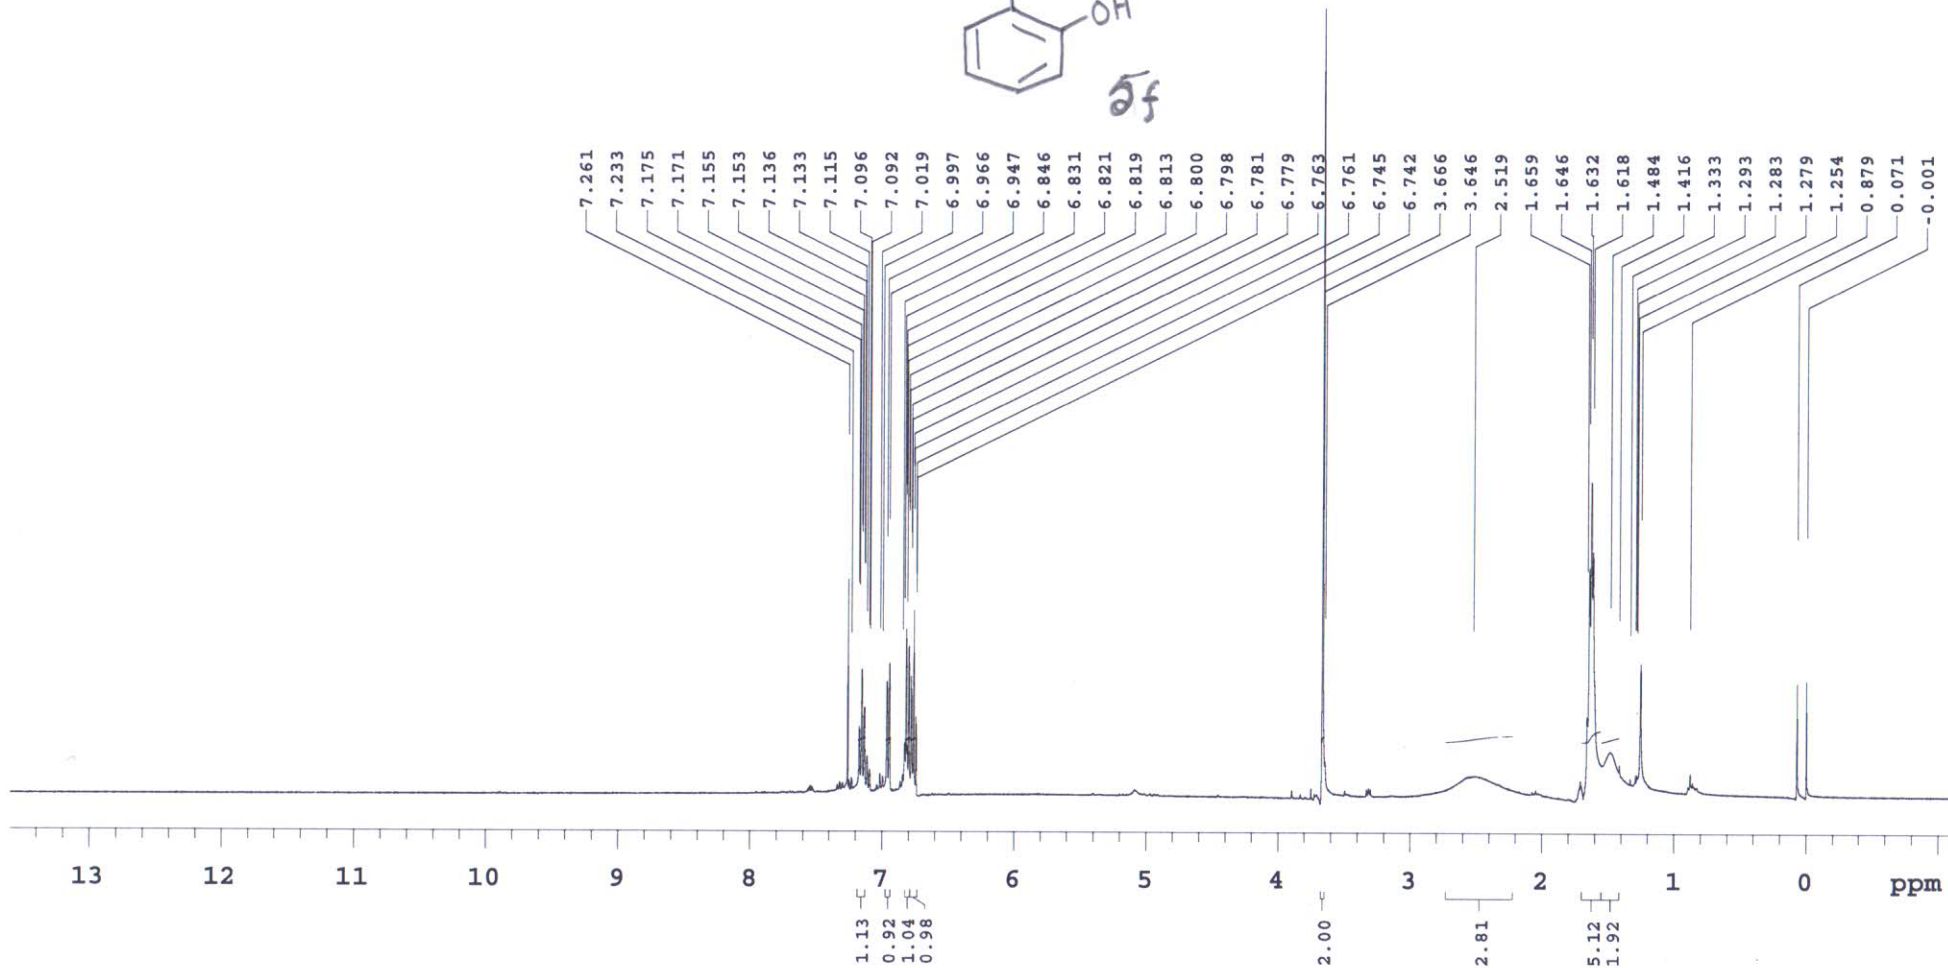

**PULSE SEQUENCE**

Relax. delay 1.000 sec  
 Pulse 45.0 degrees  
 Acq. time 2.561 sec  
 Width 10000.0 Hz  
 32 repetitions

OBSERVE H1, 399.8509644

**DATA PROCESSING**

FT size 65536  
 Total time 1 minutes

CKJ-AH-2-12C

Solvent: cdcl3  
 Temp. 25.0 C / 298.1 K  
 Operator: chem  
 File: CKJ-AH-2-12C  
 Mercury-400 "IITG-NMR"

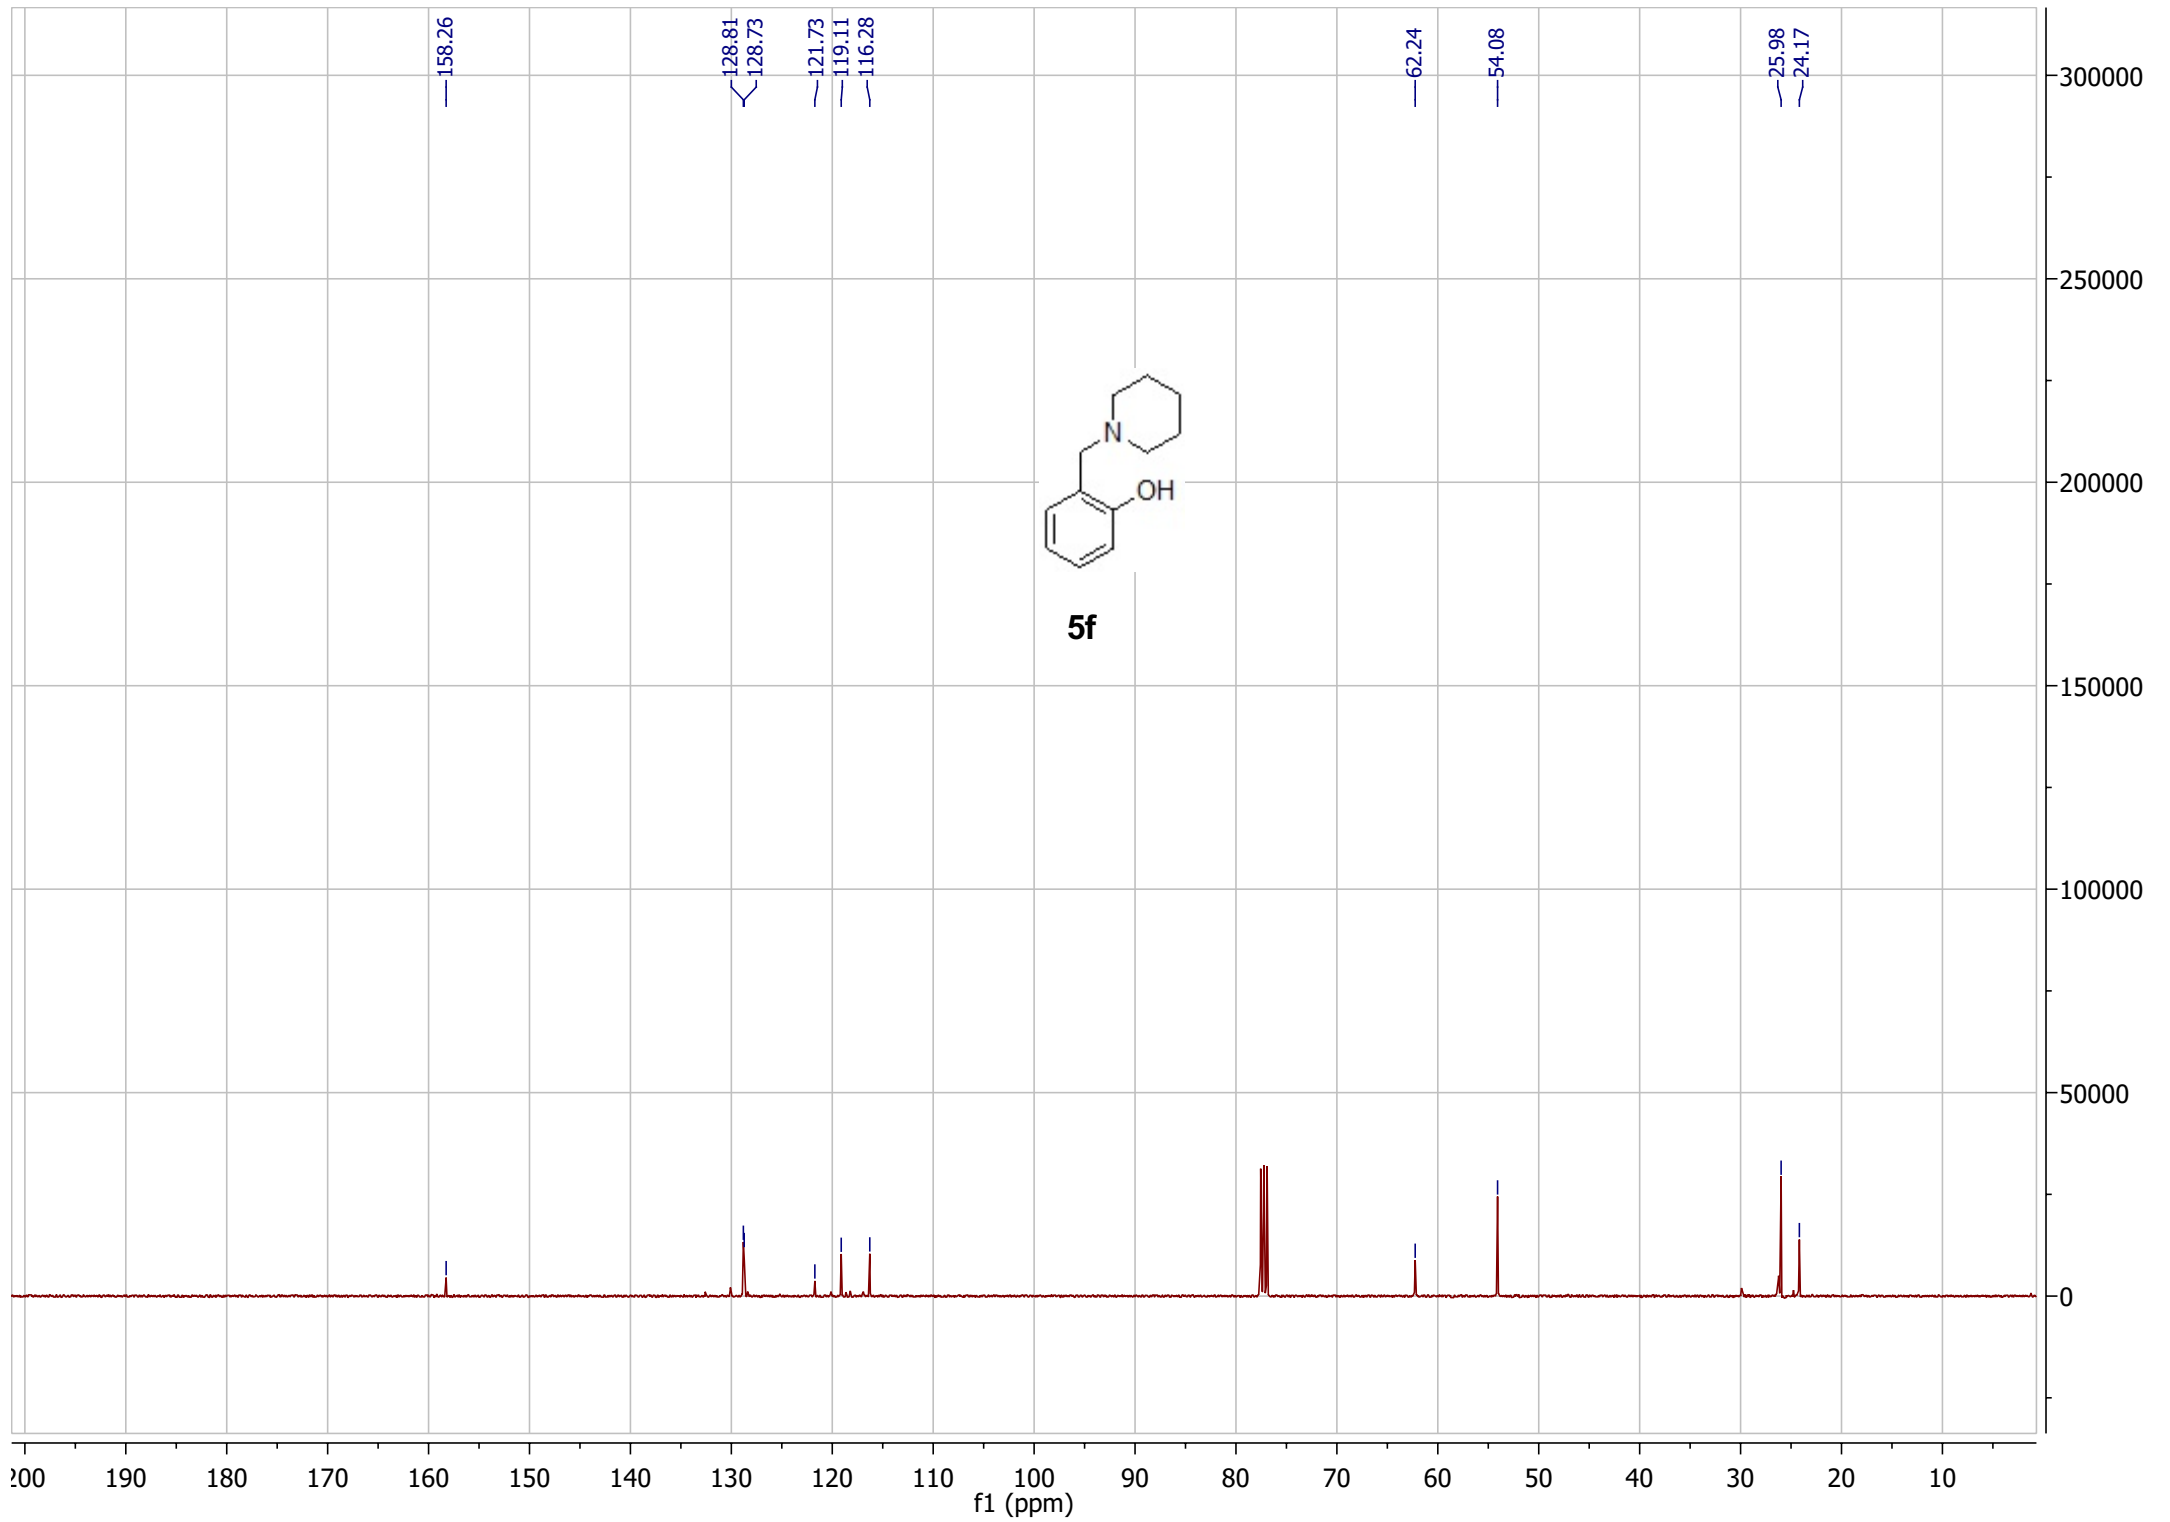

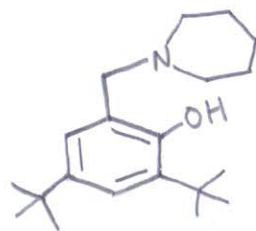

56

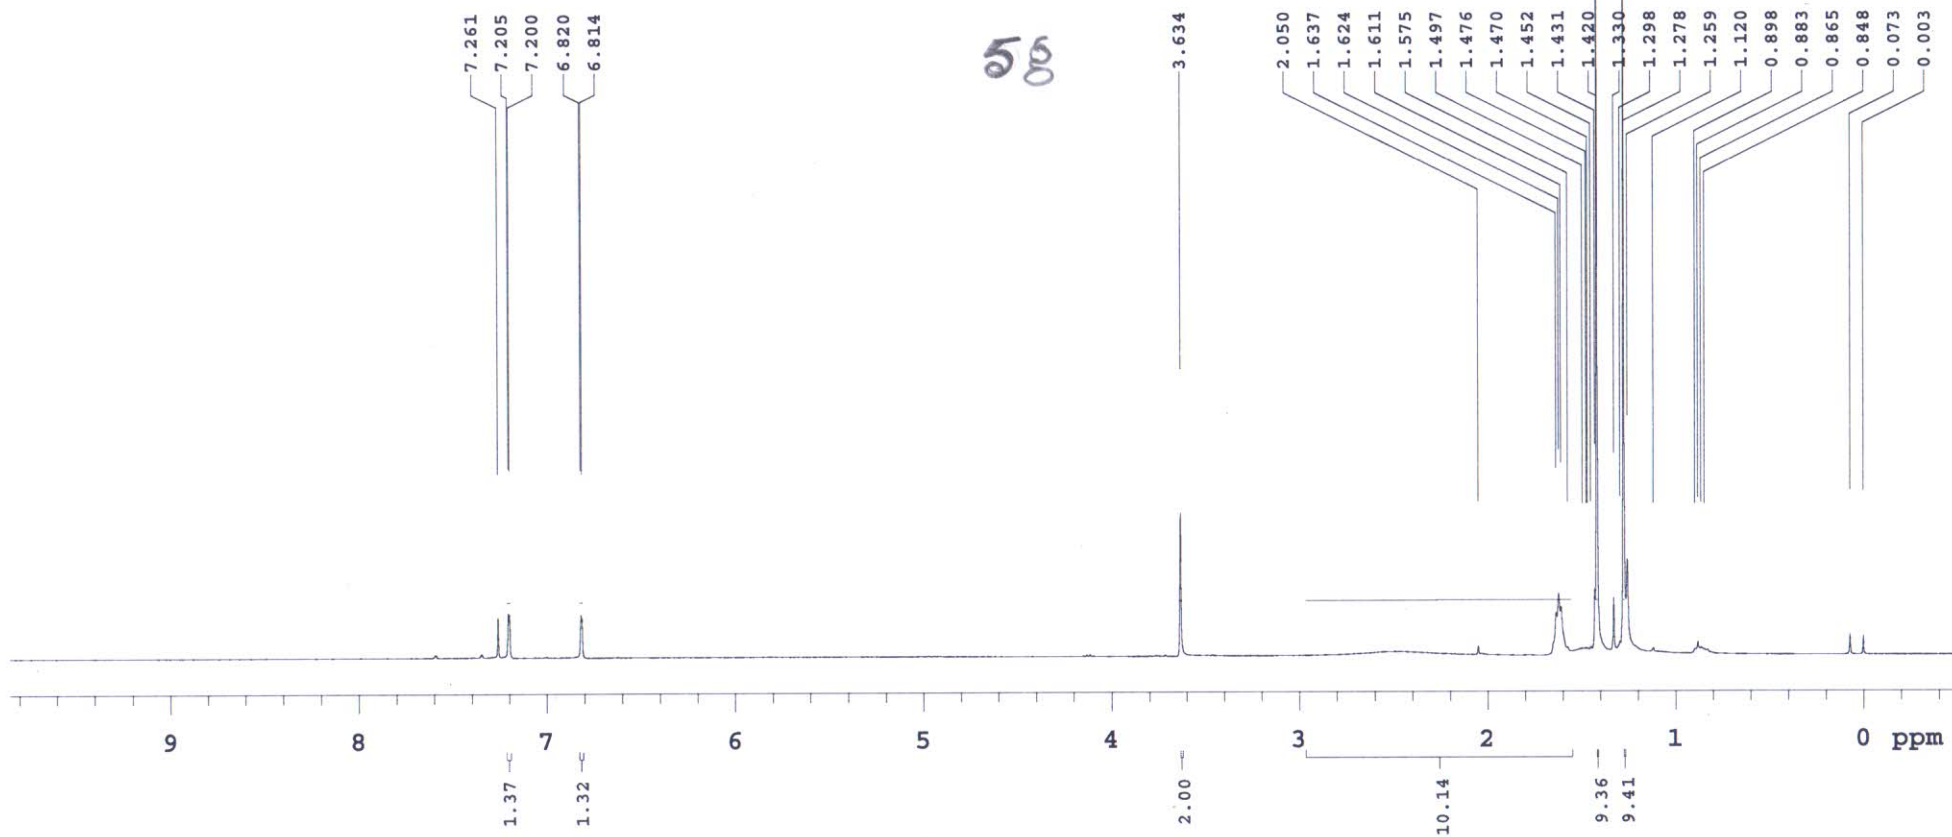

**PULSE SEQUENCE**

Relax. delay 1.000 sec  
Pulse 45.0 degrees  
Acq. time 2.561 sec  
Width 6398.0 Hz  
32 repetitions

OBSERVE H1, 399.8509637

**DATA PROCESSING**

FT size 32768  
Total time 1 minutes

CKJ-AH-2-13A

Solvent: cdcl3  
Temp. 25.0 C / 298.1 K  
Operator: chem  
File: CKJ-AH-2-13A  
Mercury-400 "IITG-NMR"

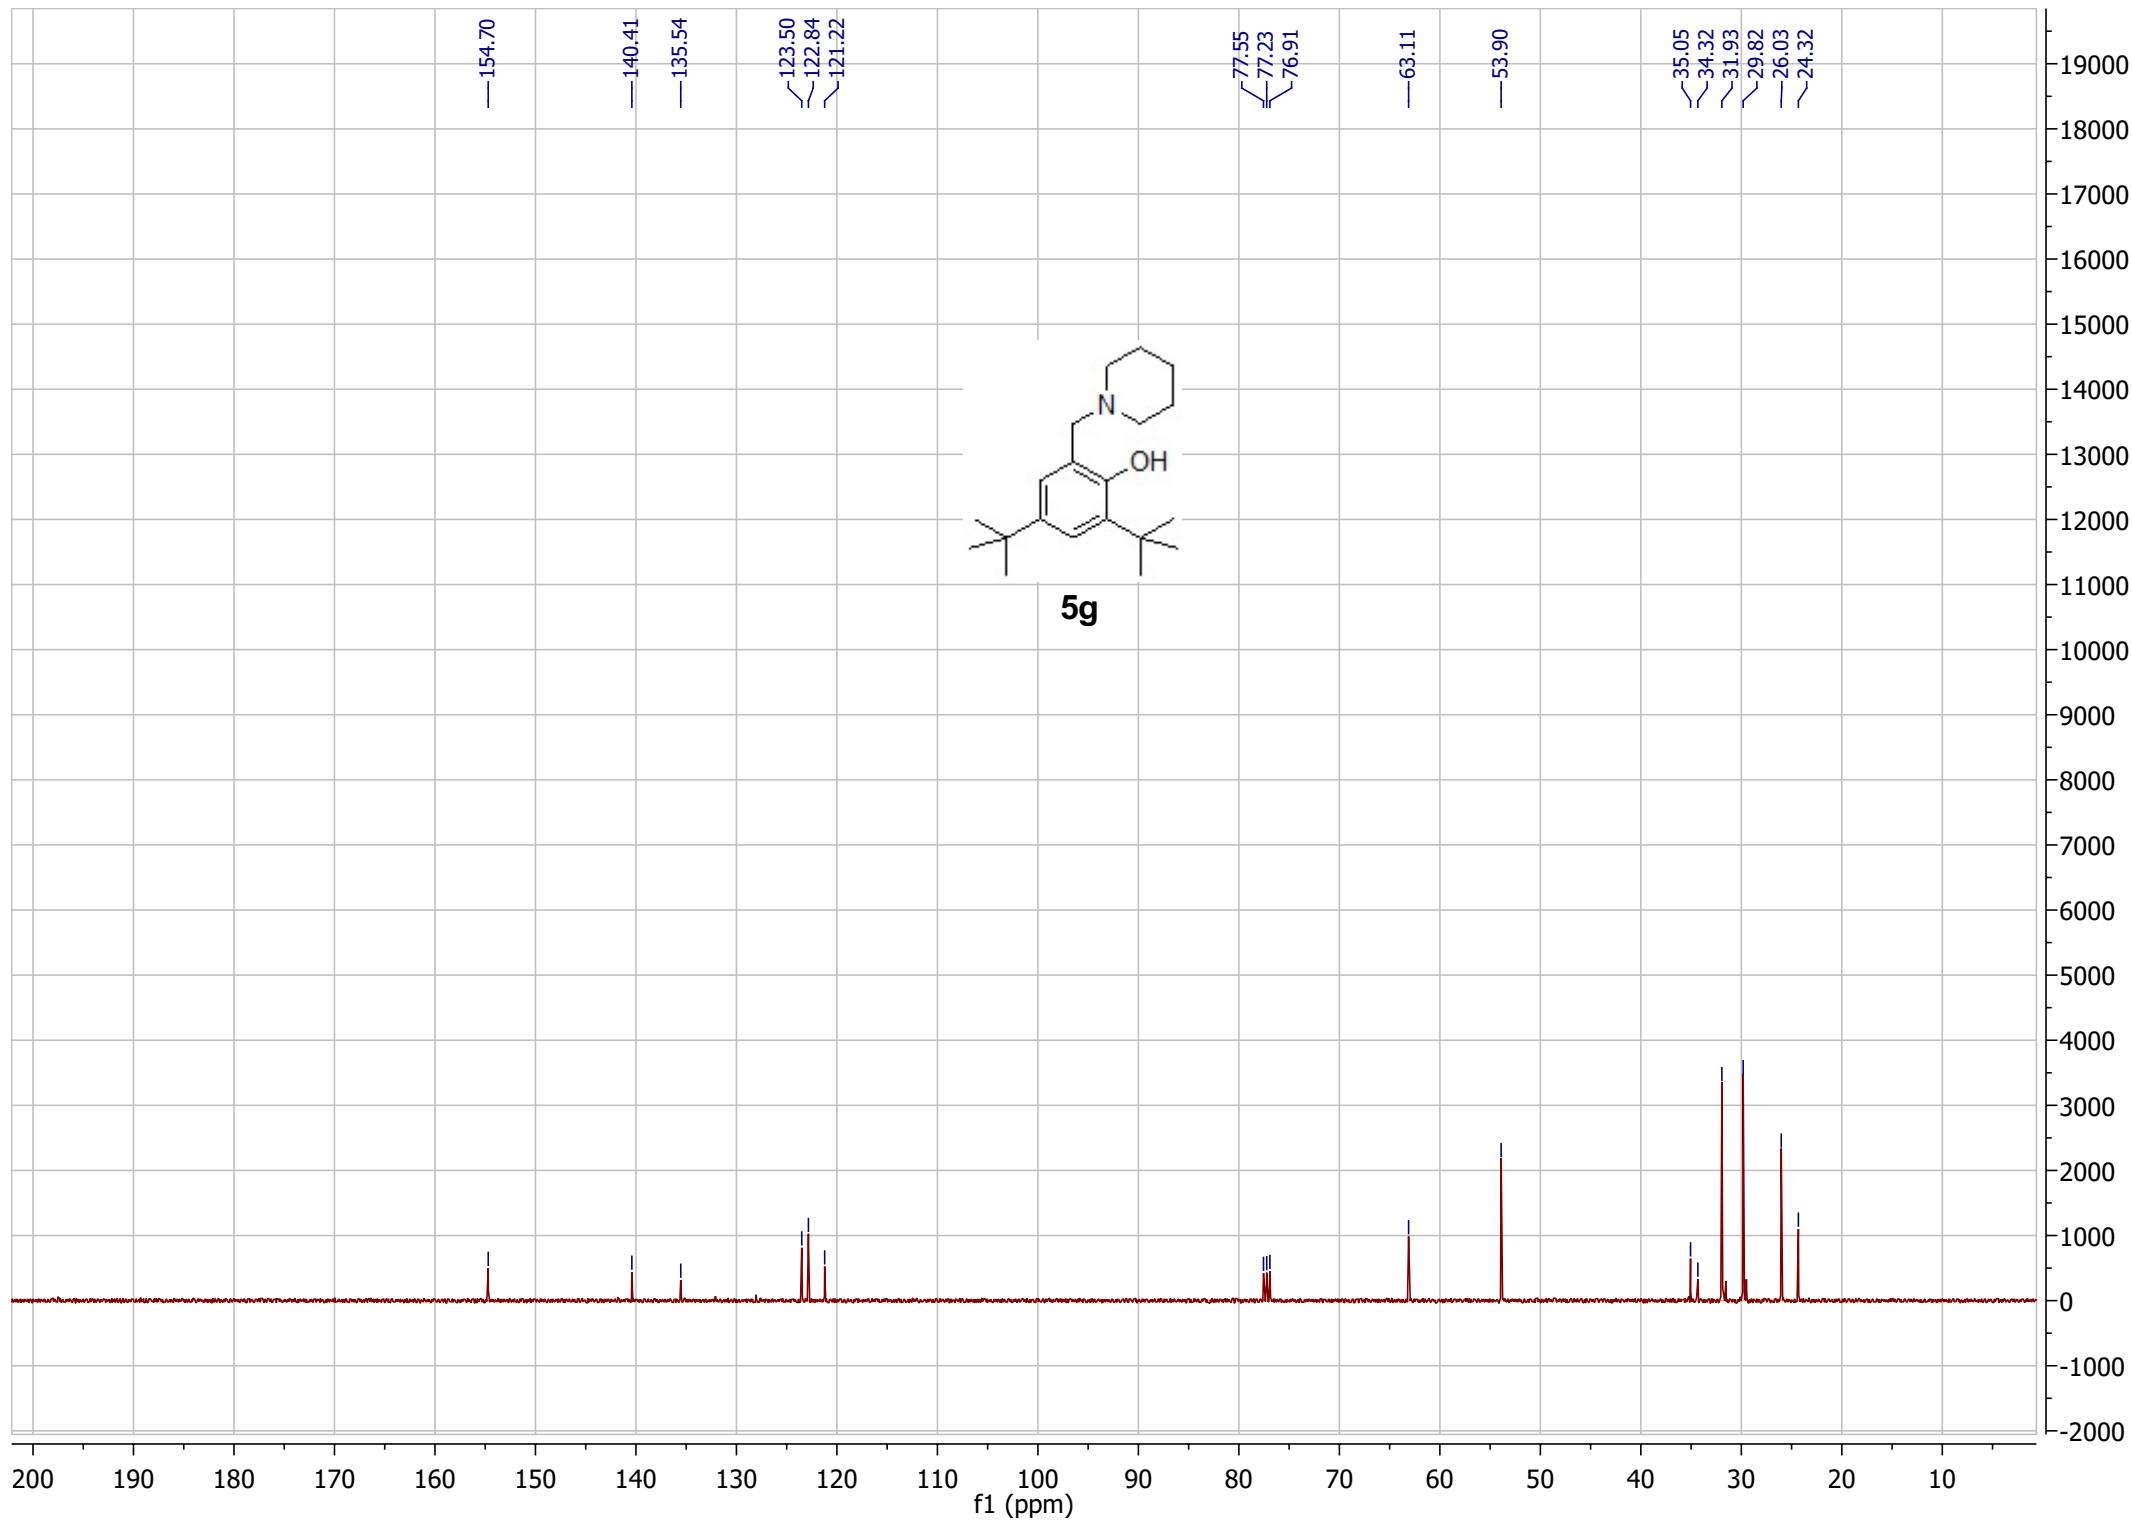



CKJ-AH-2-16C-1H

7.260  
7.172  
7.170  
7.158  
7.146  
7.144  
6.949  
6.936  
6.823  
6.810  
6.771  
6.769  
6.758  
6.757  
6.745

3.780

2.708

1.698  
1.690  
1.643  
1.639  
1.634

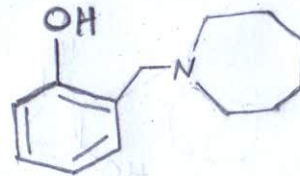

5h

Current Data Parameters  
NAME CKJ-AH-2-16C-1H  
EXPNO 1  
PROCNO 1

F2 - Acquisition Parameters  
Date\_ 20140417  
Time 11.09  
INSTRUM spect  
PROBHD 5 mm PABBO BB/  
PULPROG zg30  
TD 32768  
SOLVENT CDCl3  
NS 16  
DS 2  
SWH 12019.230 Hz  
FIDRES 0.366798 Hz  
AQ 1.3631488 sec  
RG 99.36  
DW 41.600 usec  
DE 6.50 usec  
TE 301.8 K  
D1 1.00000000 sec  
TDO 1

===== CHANNEL f1 =====  
SFO1 600.1737063 MHz  
NUC1 1H  
P1 12.00 usec  
PLW1 21.00000000 W

F2 - Processing parameters  
SI 16384  
SF 600.1700148 MHz  
WDW EM  
SSB 0  
LB 0.30 Hz  
GB 0  
PC 1.00

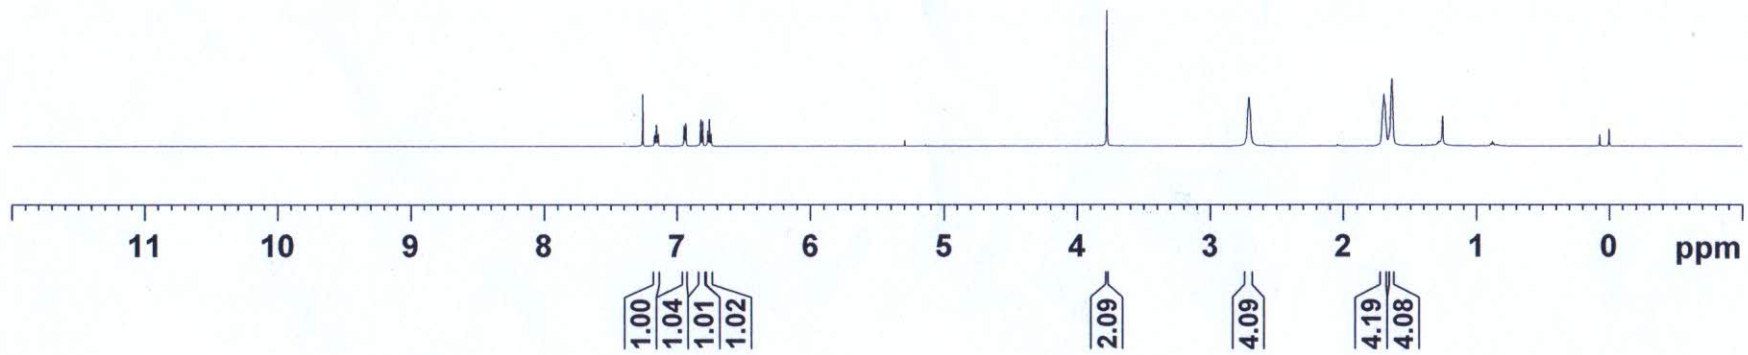

CKJ-AH-2-180

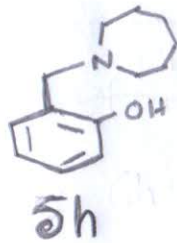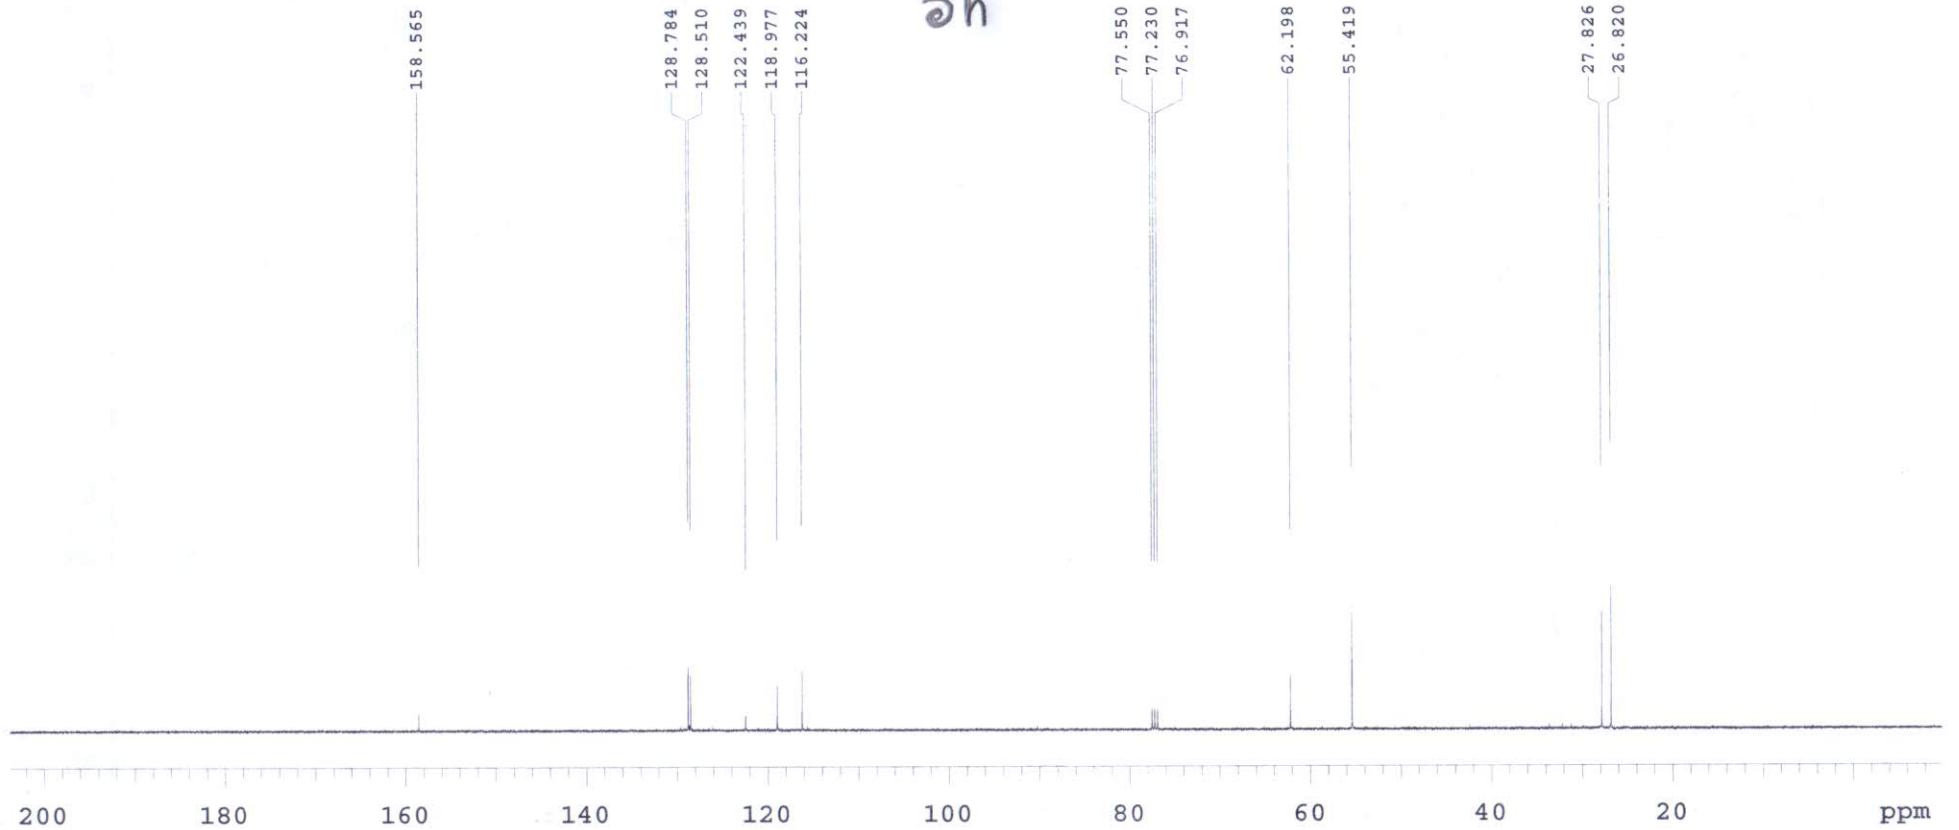

PULSE SEQUENCE: OBSERVE - C13, 100.5425878  
Relax. delay 1.000 sec DECOUPLE H1, 399.8529994  
Pulse 45.0 degrees Power 42 dB  
Acq. time 1.304 sec continuously on  
Width 25125.6 Hz WALTZ-16 modulated  
384 repetitions

DATA PROCESSING: CKJ-AH-2-16C-13C  
Line broadening 0.5 Hz  
FT size 65536  
Total time 14 minutes

Solvent: Cdc13  
Temp. 25.0°C / 298.1 K  
Operator: chem  
Mercury-400 "IITG-NMR"

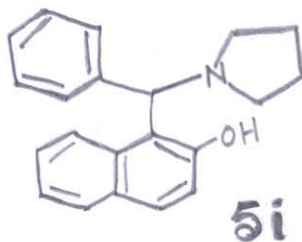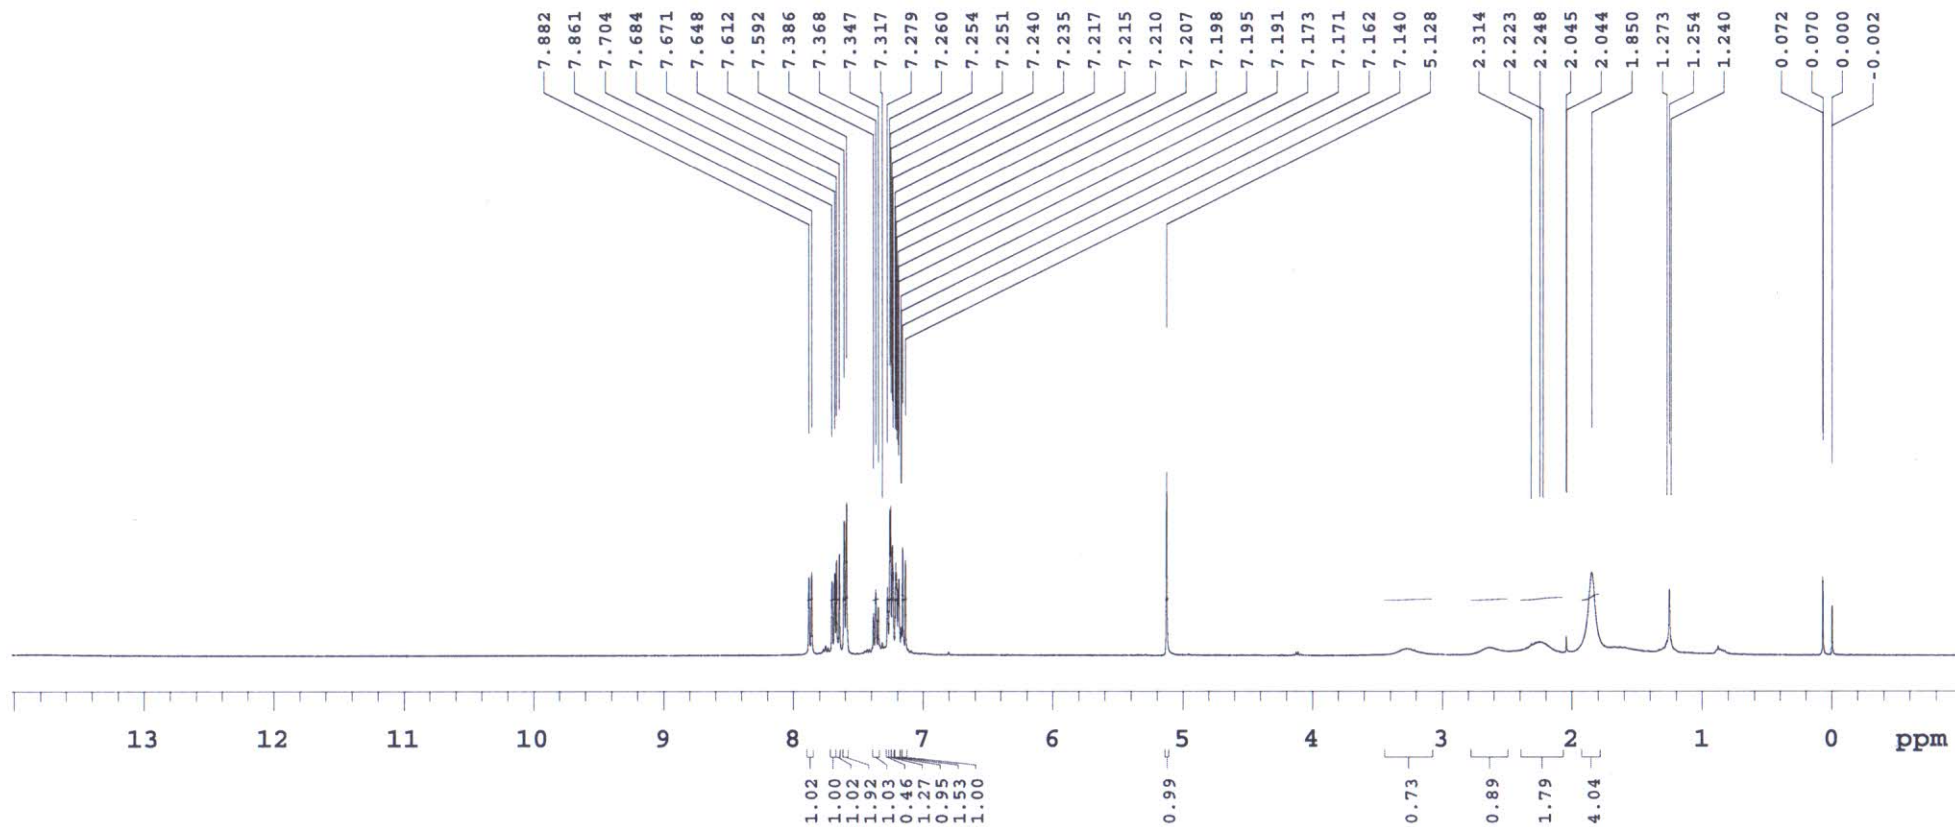

PULSE SEQUENCE  
 Relax. delay 1.000 sec  
 Pulse 45.0 degrees  
 Acq. time 2.561 sec  
 Width 8000.0 Hz  
 32 repetitions

OBSERVE H1, 399.8509667

DATA PROCESSING  
 FT size 65536  
 Total time 1 minutes

CKJ-AH-2-10C  
 Solvent: cdcl3  
 Temp. 25.0 C / 298.1 K  
 Operator: chem  
 File: CKJ-AH-2-10C  
 Mercury-400 "IITG-NMR"

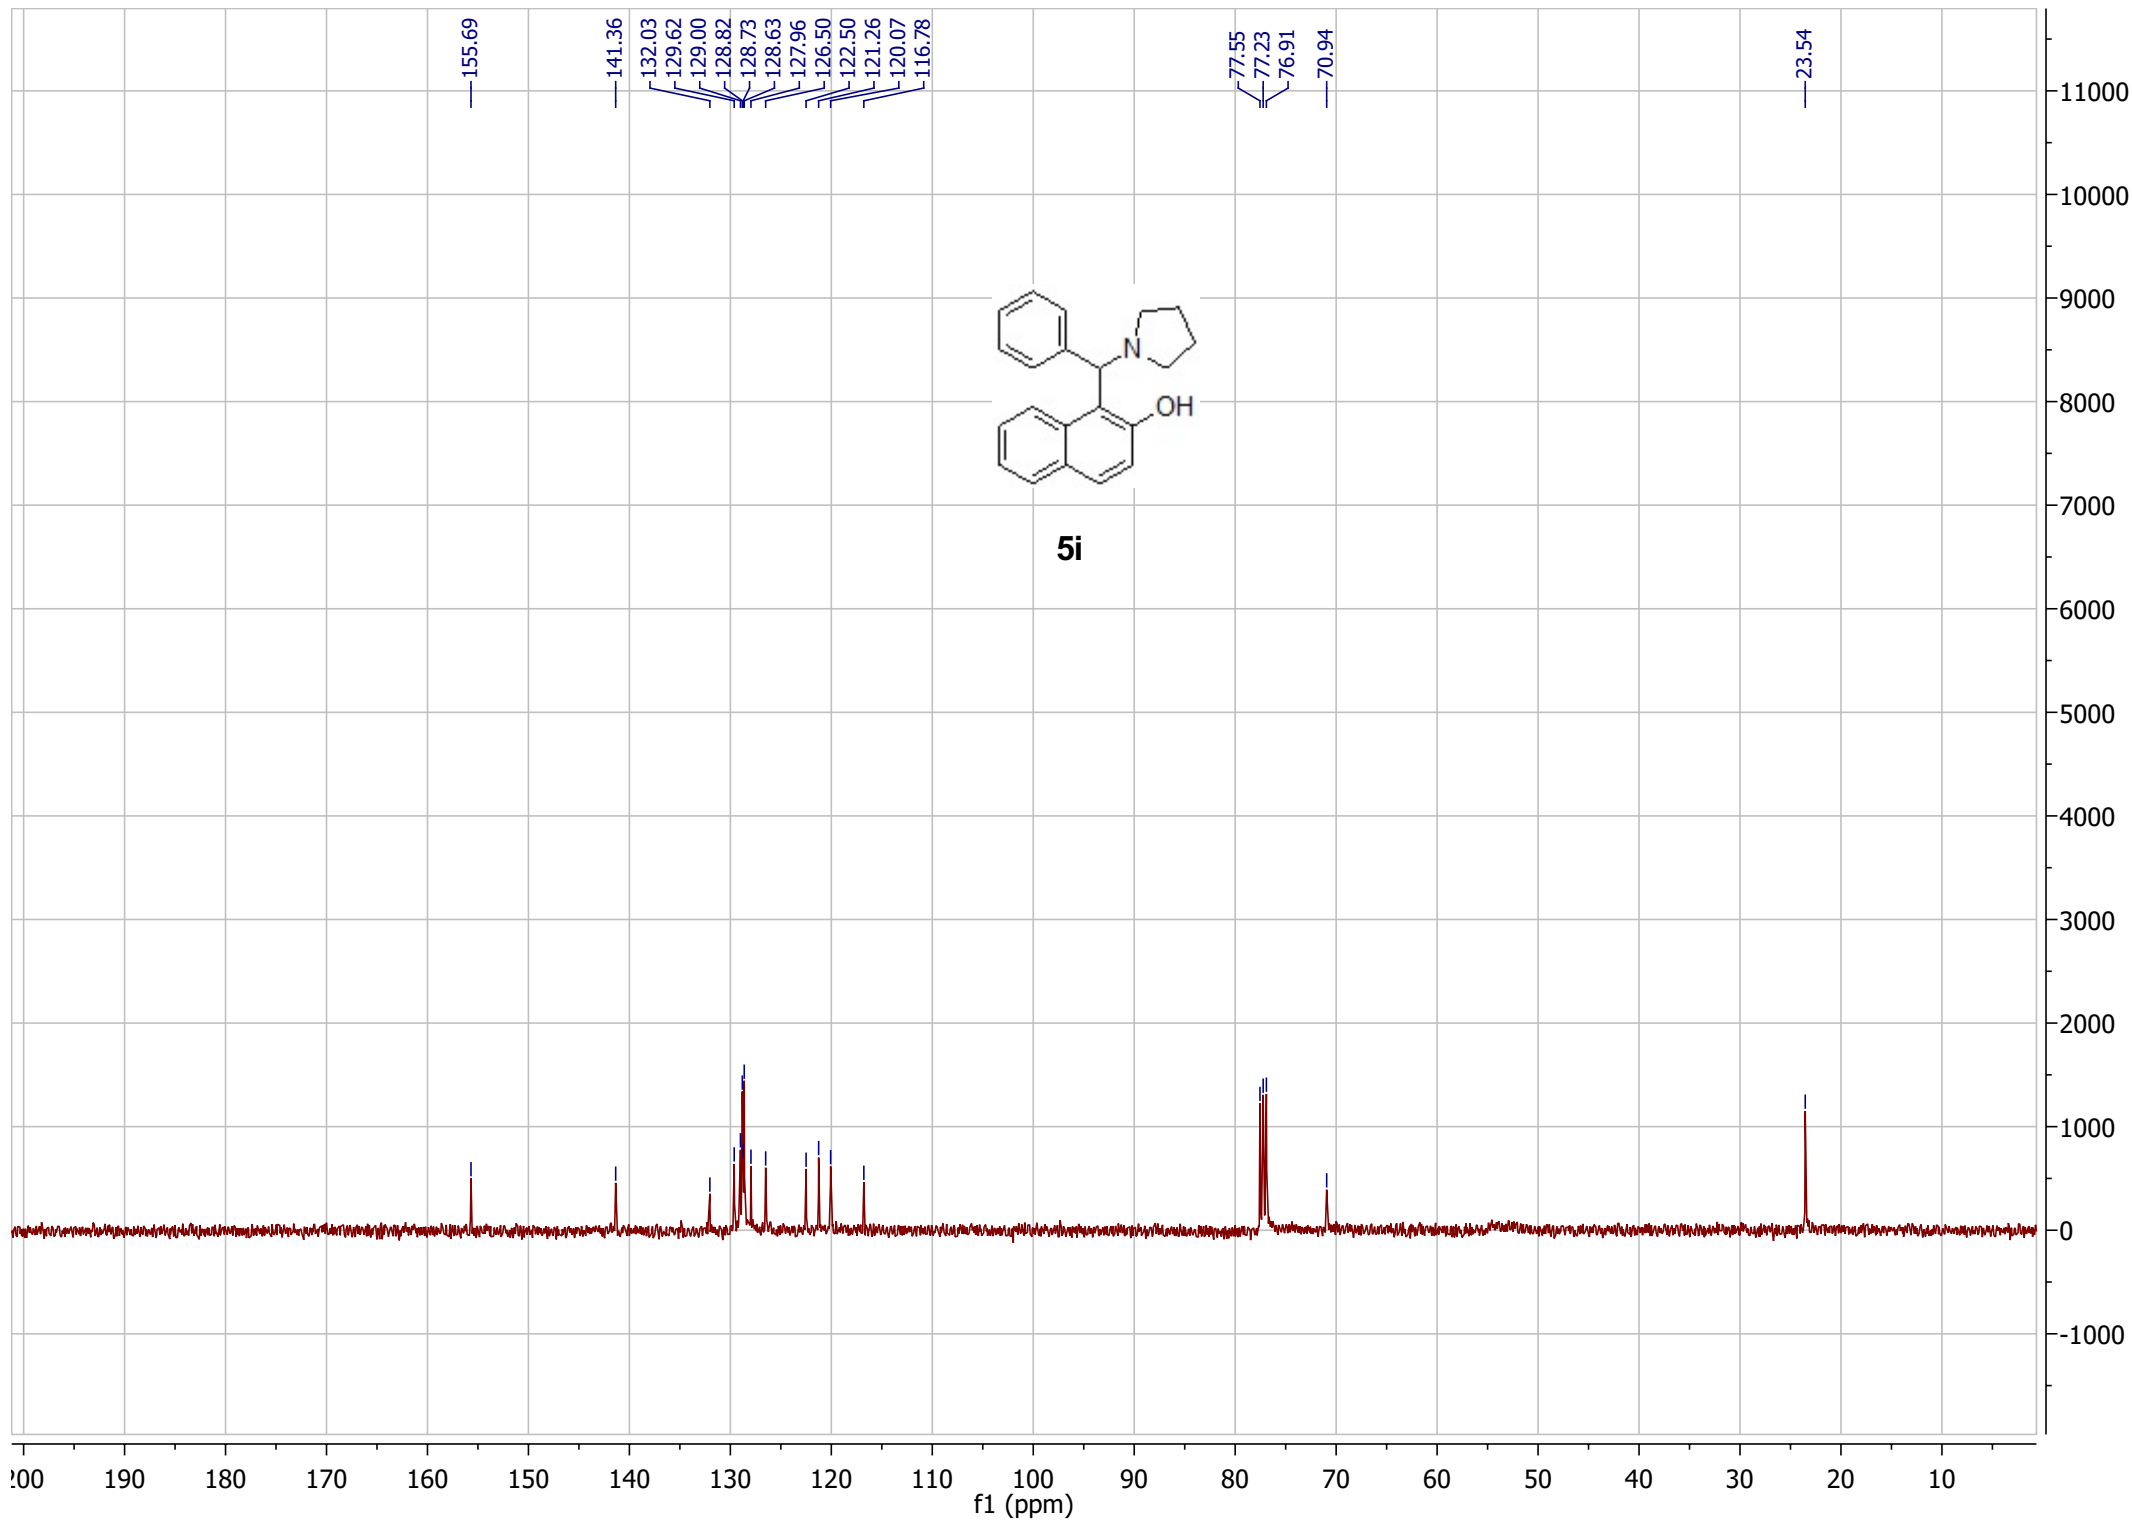

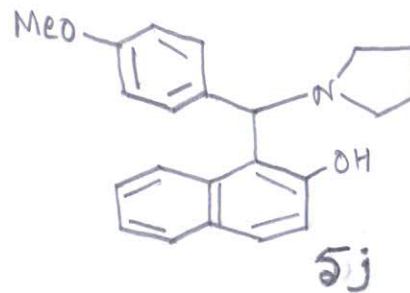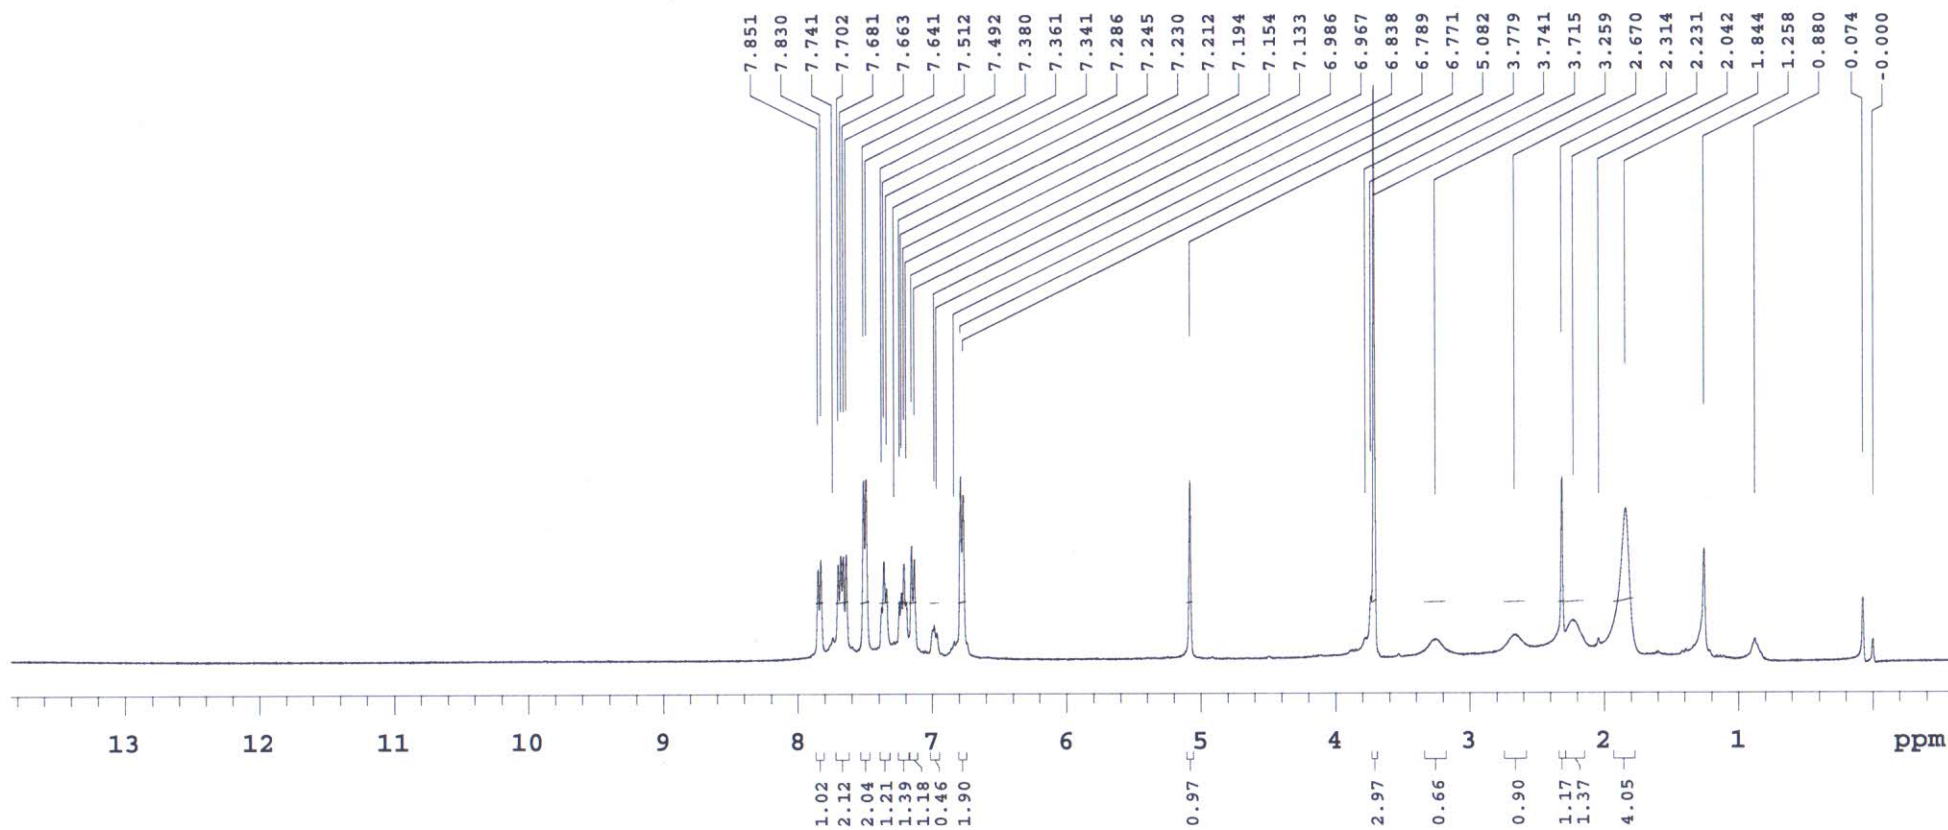

PULSE SEQUENCE  
Relax. delay 1.000 sec  
Pulse 45.0 degrees  
Acq. time 2.561 sec  
Width 10000.0 Hz  
32 repetitions

OBSERVE H1, 399.8509693

DATA PROCESSING  
FT size 65536  
Total time 1 minutes

CKJ-AH-2-14C

Solvent: cdcl3  
Temp. 25.0 C / 298.1 K  
Operator: chem  
File: CKJ-AH-2-14C  
Mercury-400 "IITG-NMR"

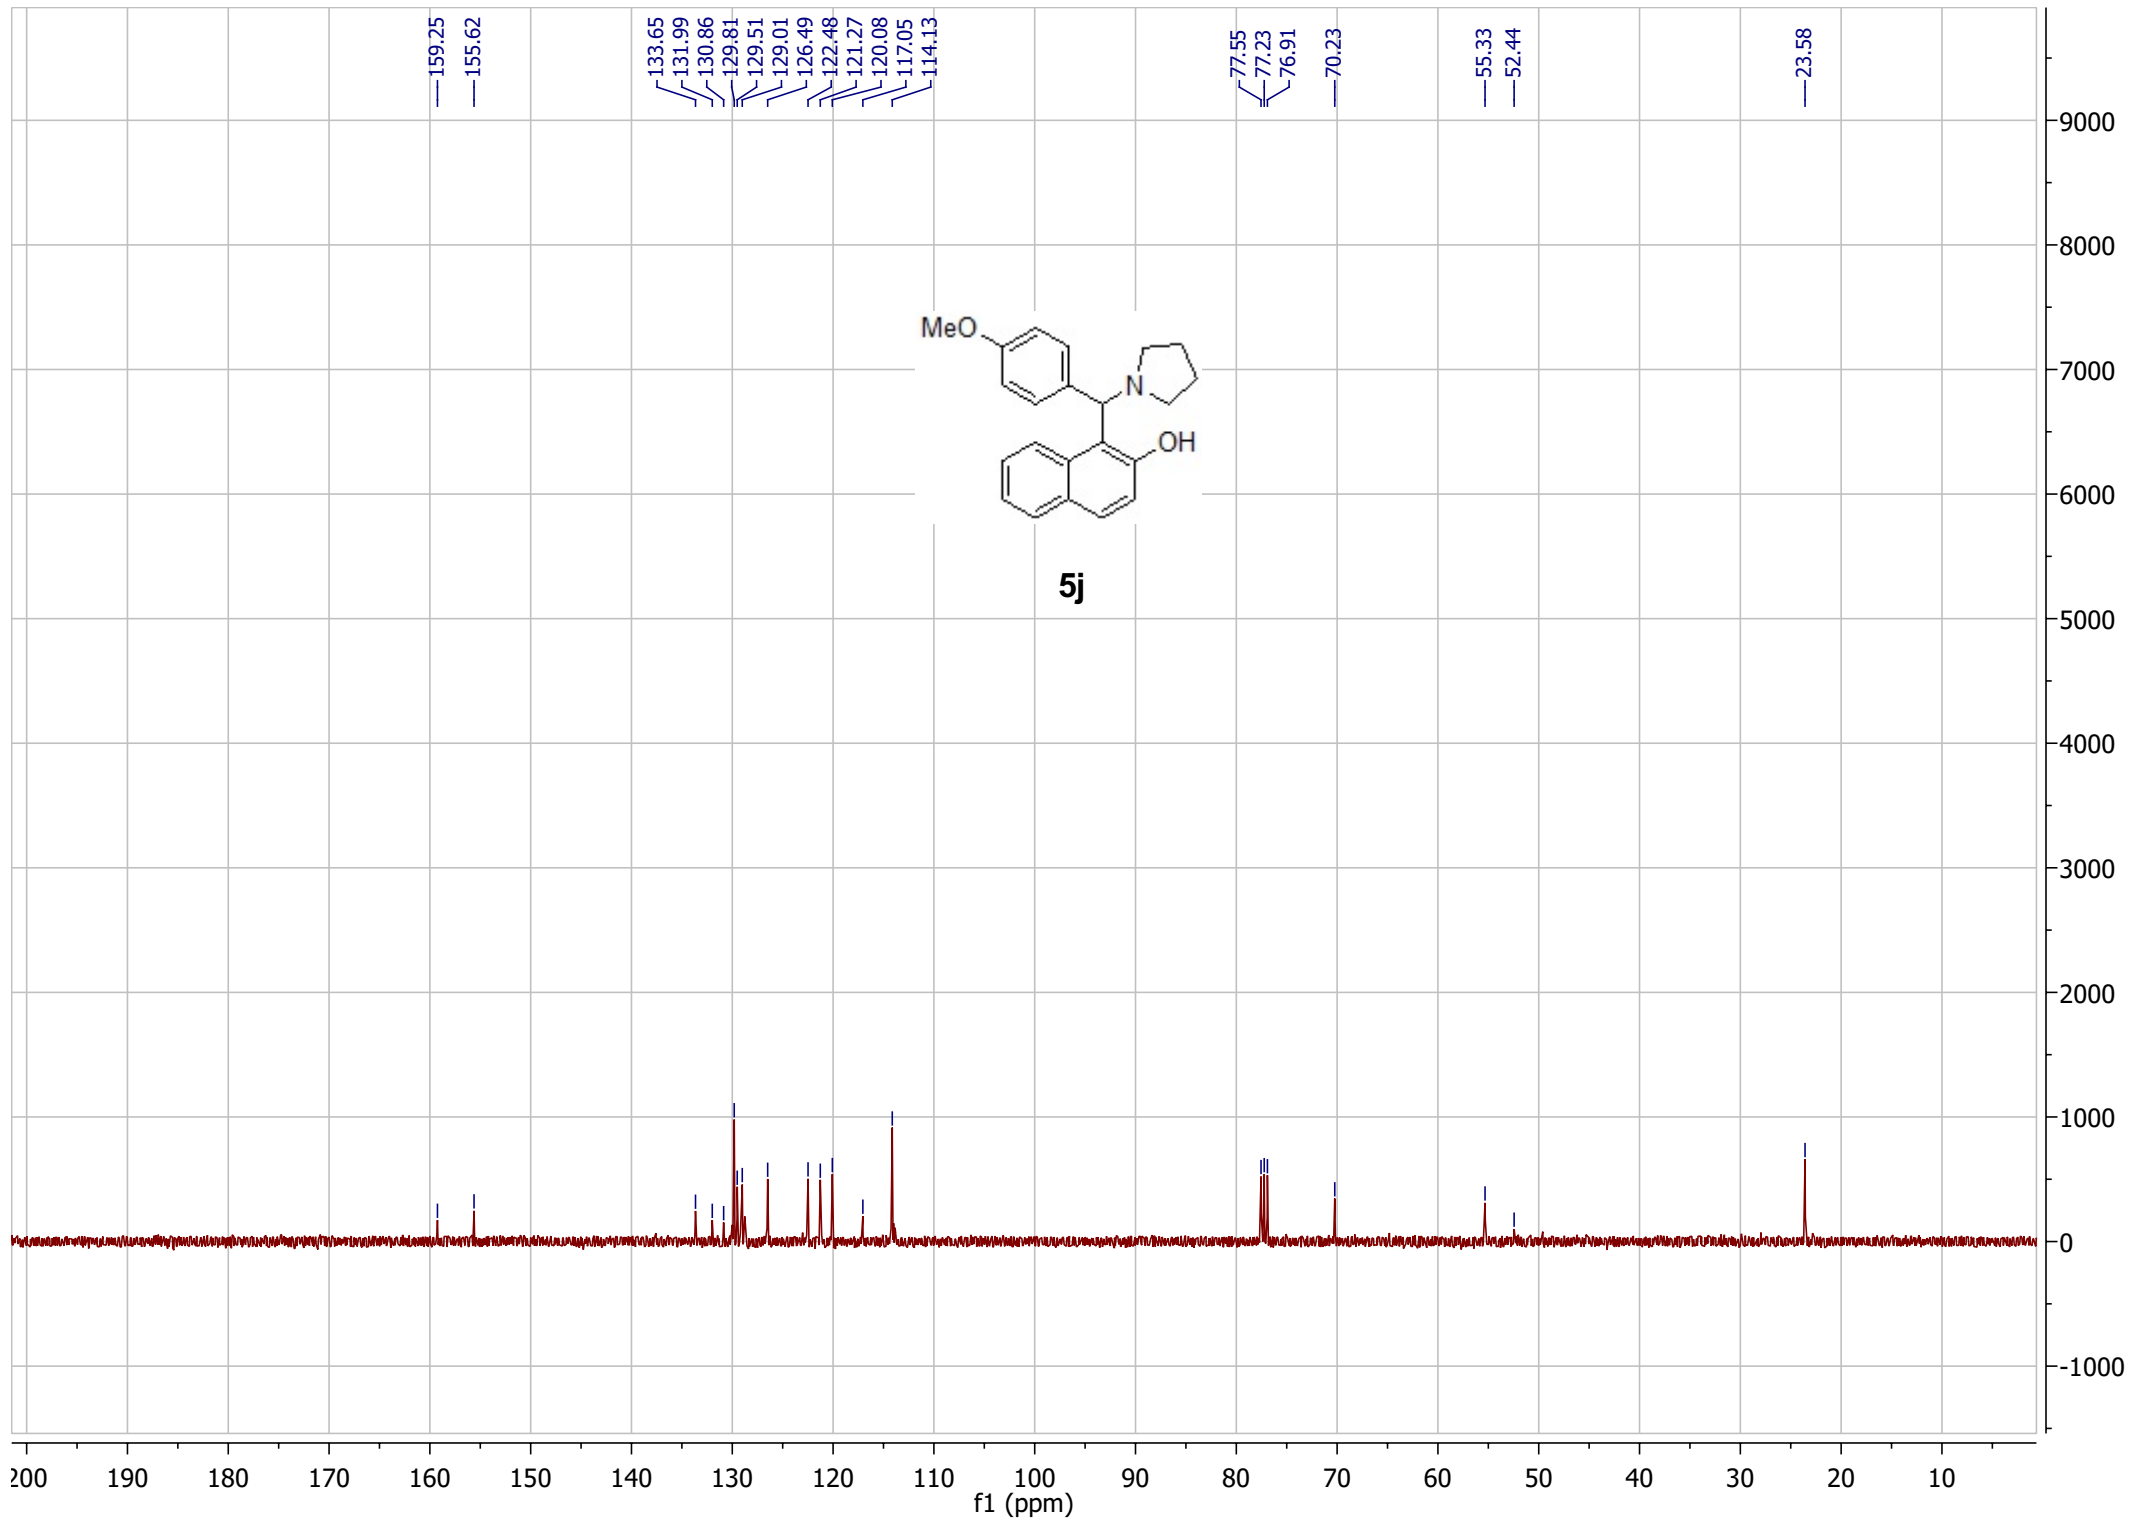

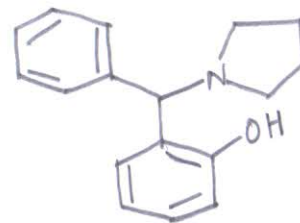

5k

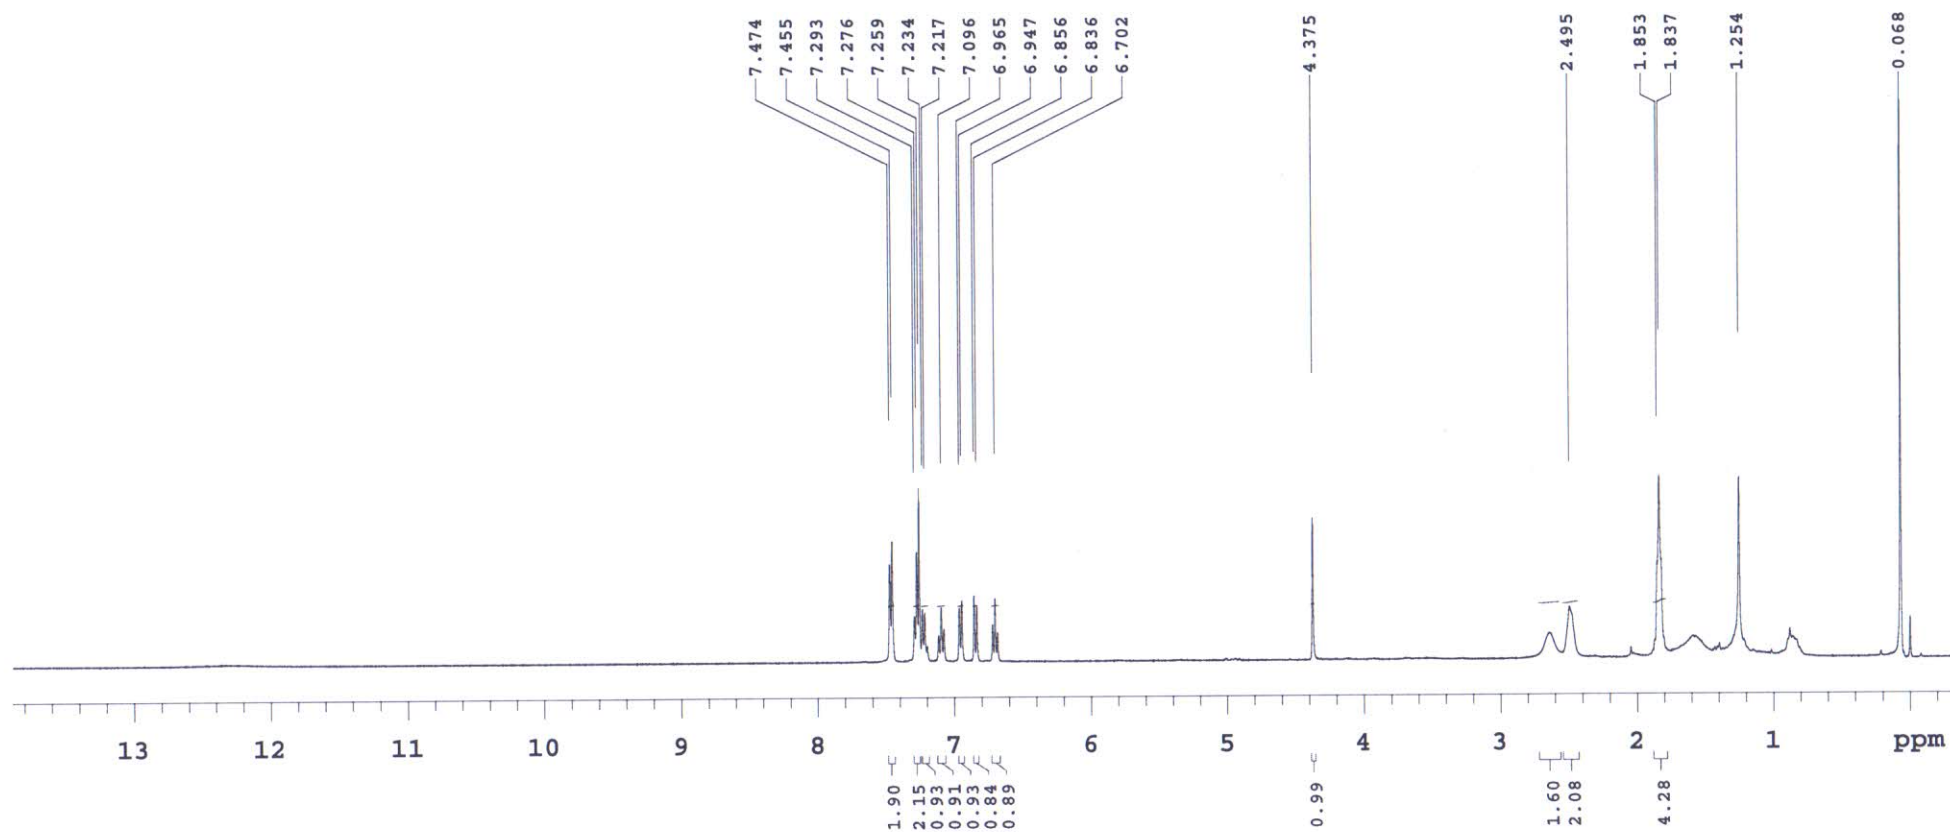

PULSE SEQUENCE  
 Relax. delay 1.000 sec  
 Pulse 45.0 degrees  
 Acq. time 2.561 sec  
 Width 8000.0 Hz  
 32 repetitions

OBSERVE H1, 399.8509633

DATA PROCESSING  
 FT size 65536  
 Total time 1 minutes

CKJ-AH-2-20B

Solvent: cdcl3  
 Temp. 25.0 C / 298.1 K  
 Operator: chem  
 File: CKJ-AH-2-20B  
 Mercury-400 "IITG-NMR"

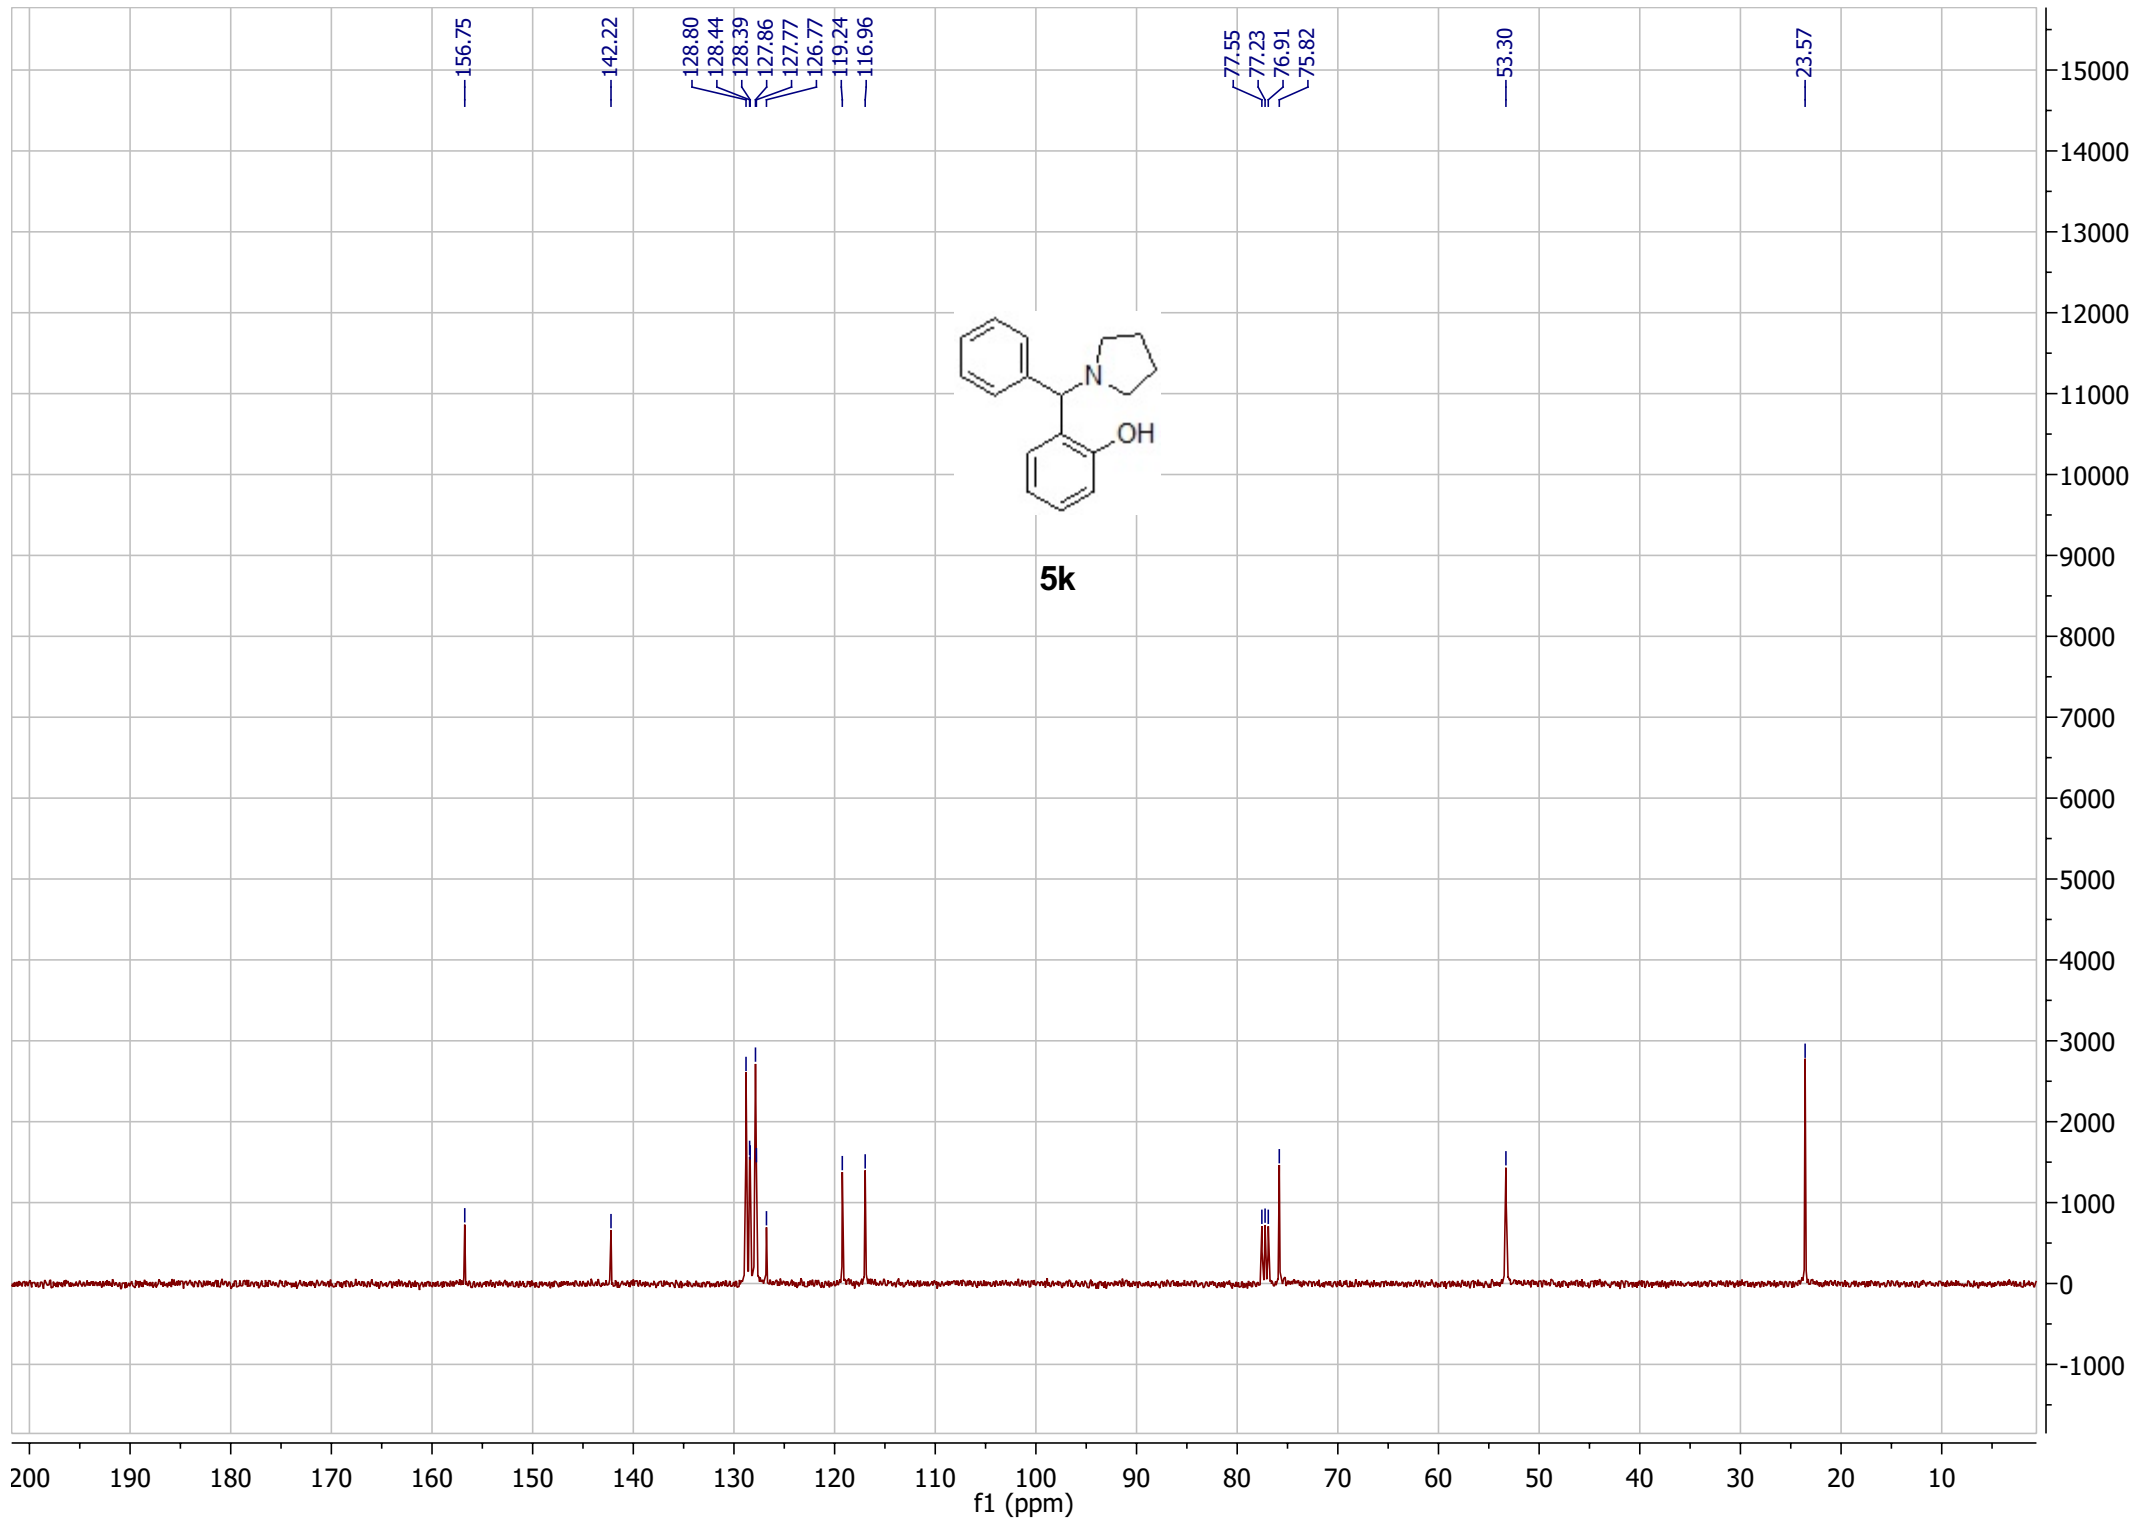



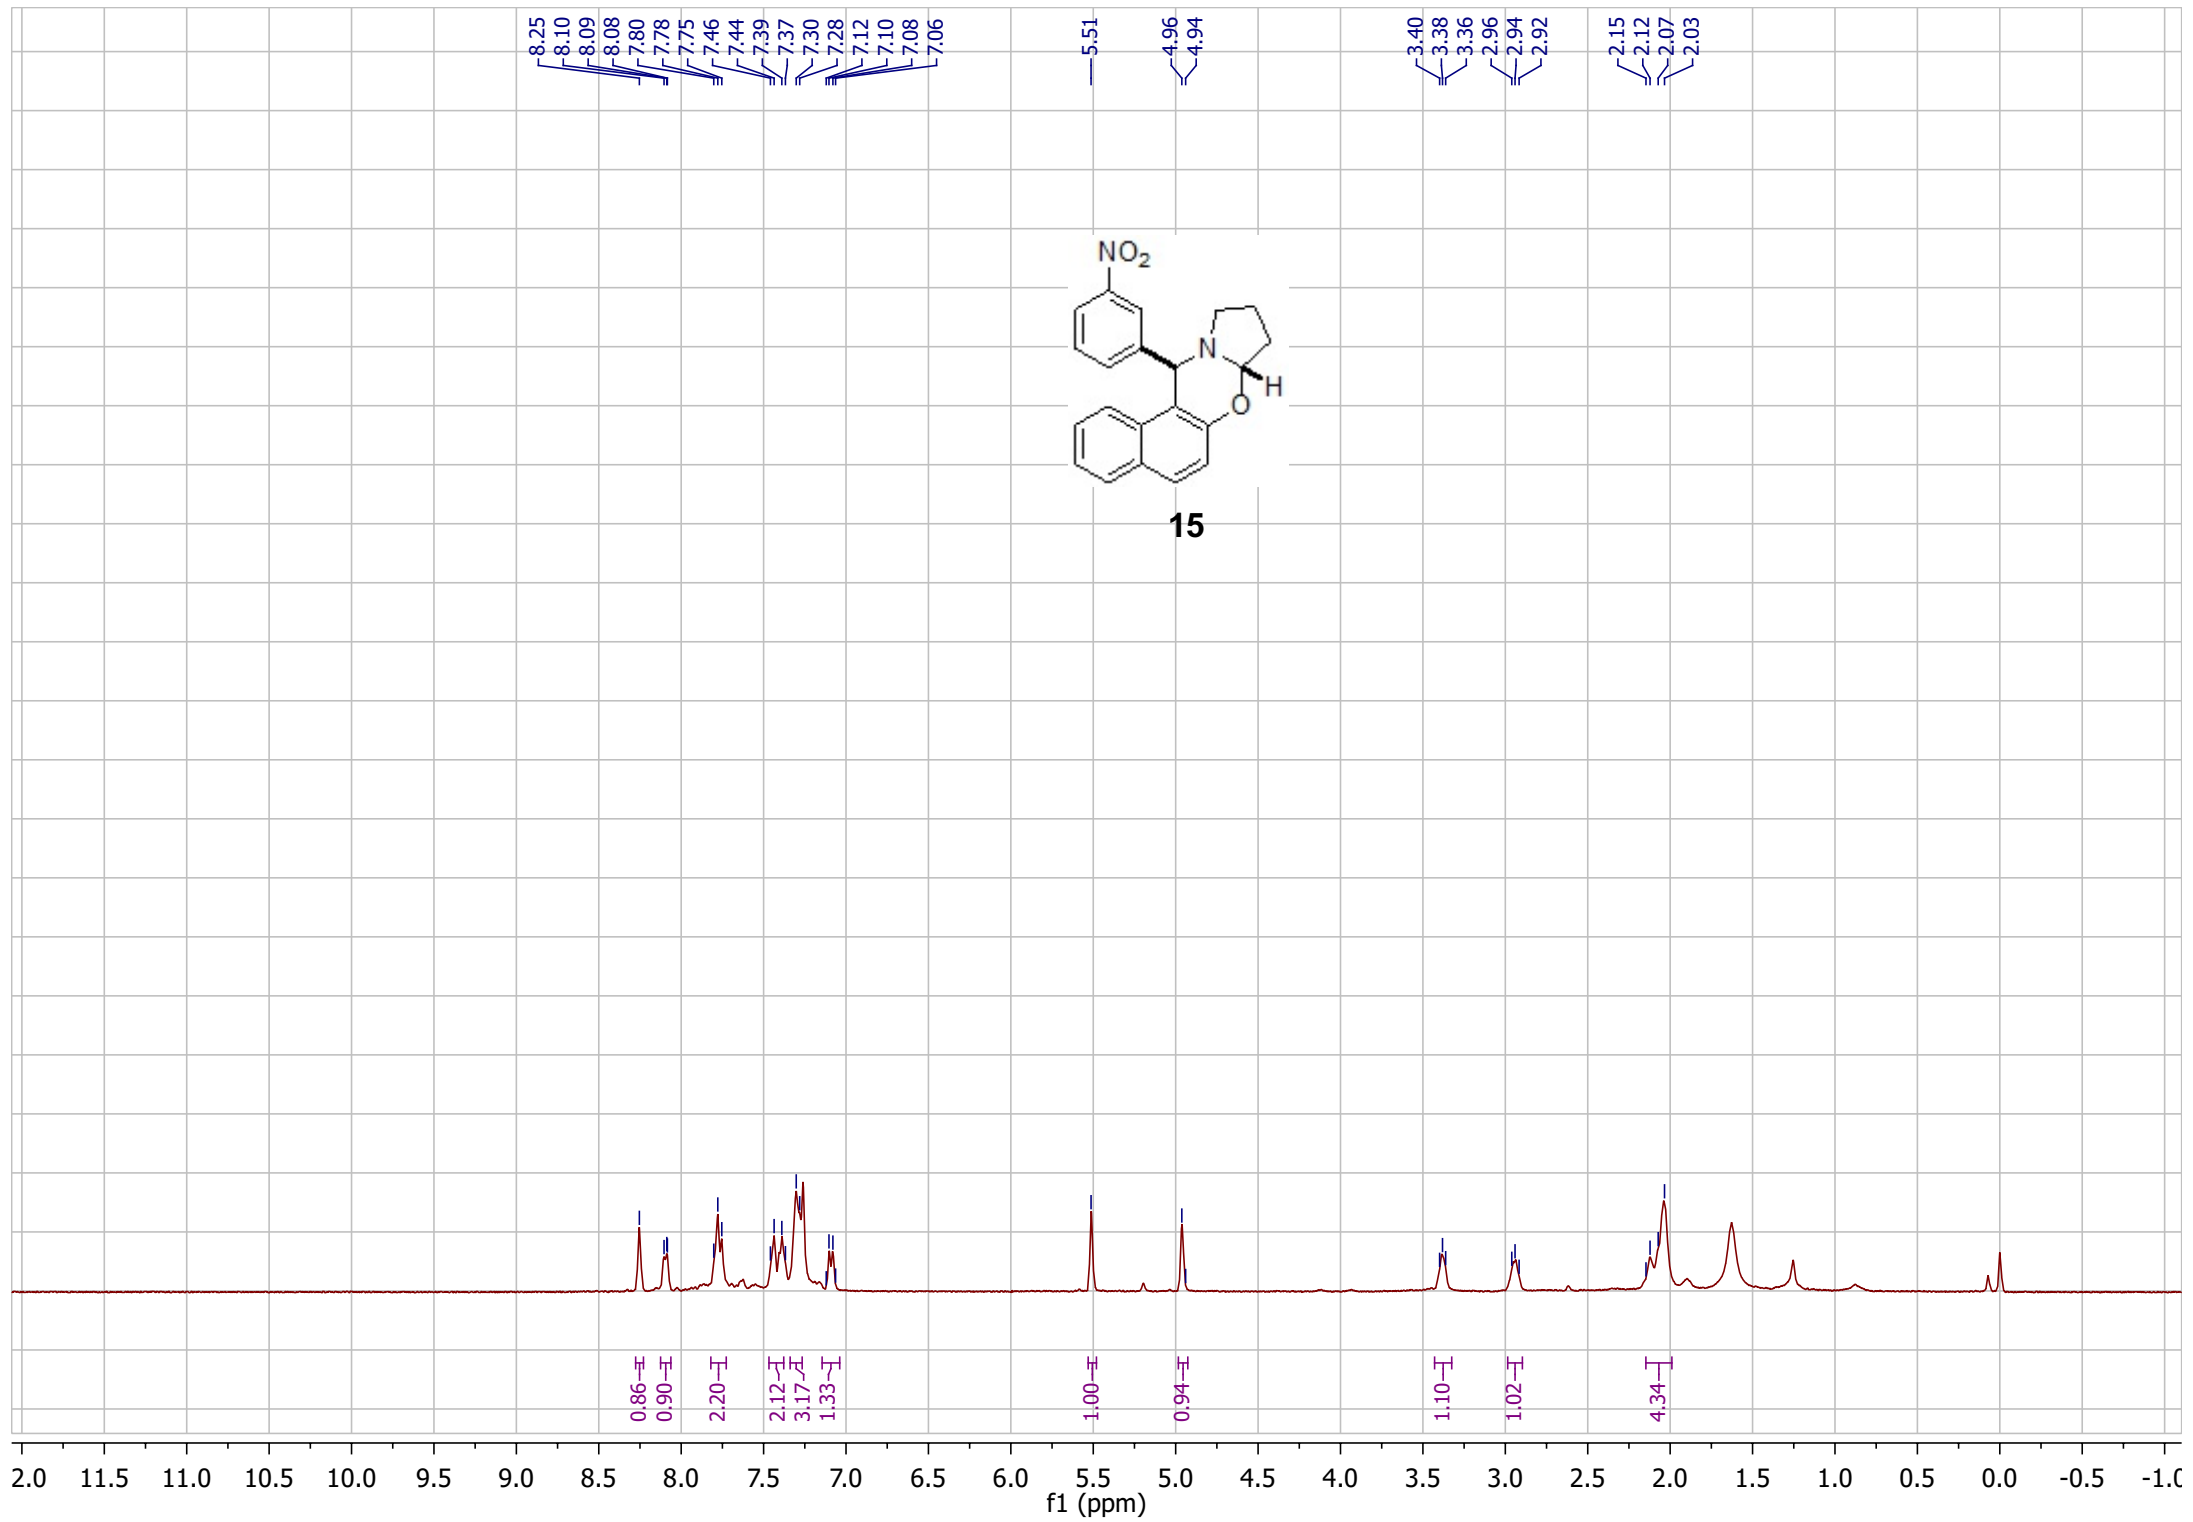

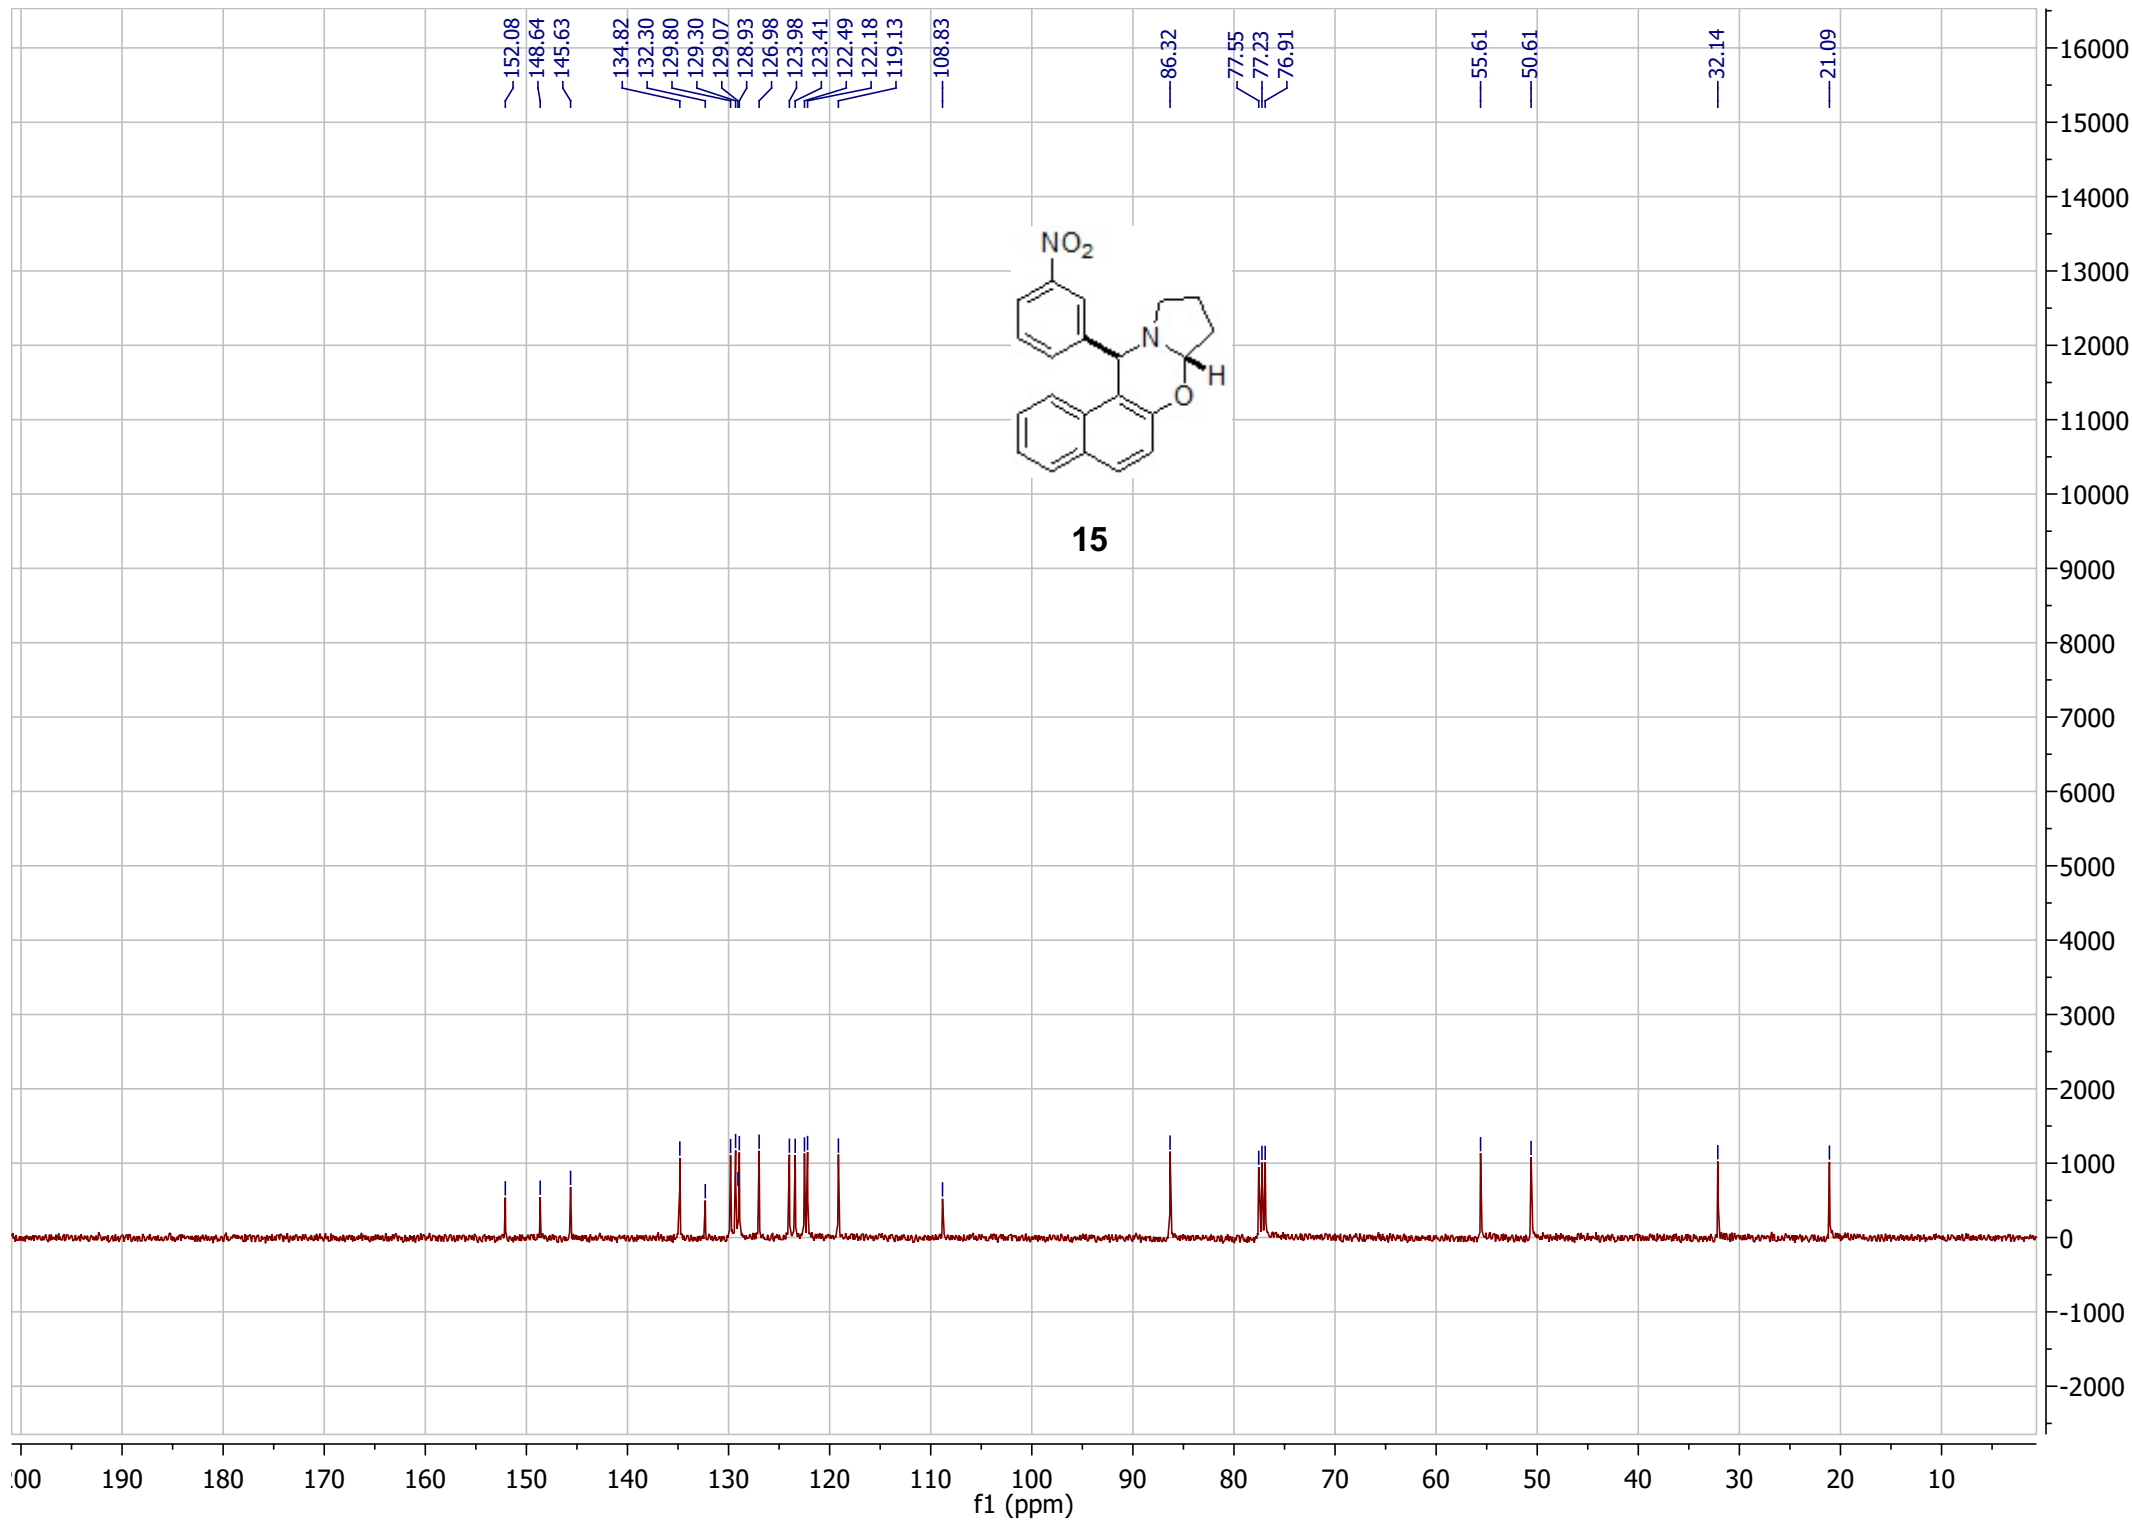

CKJ-AH-2-30B1-1H

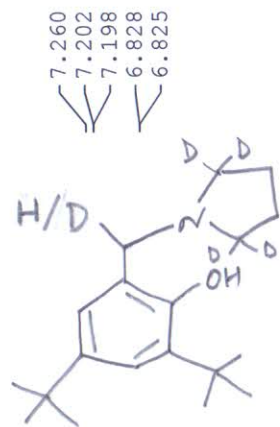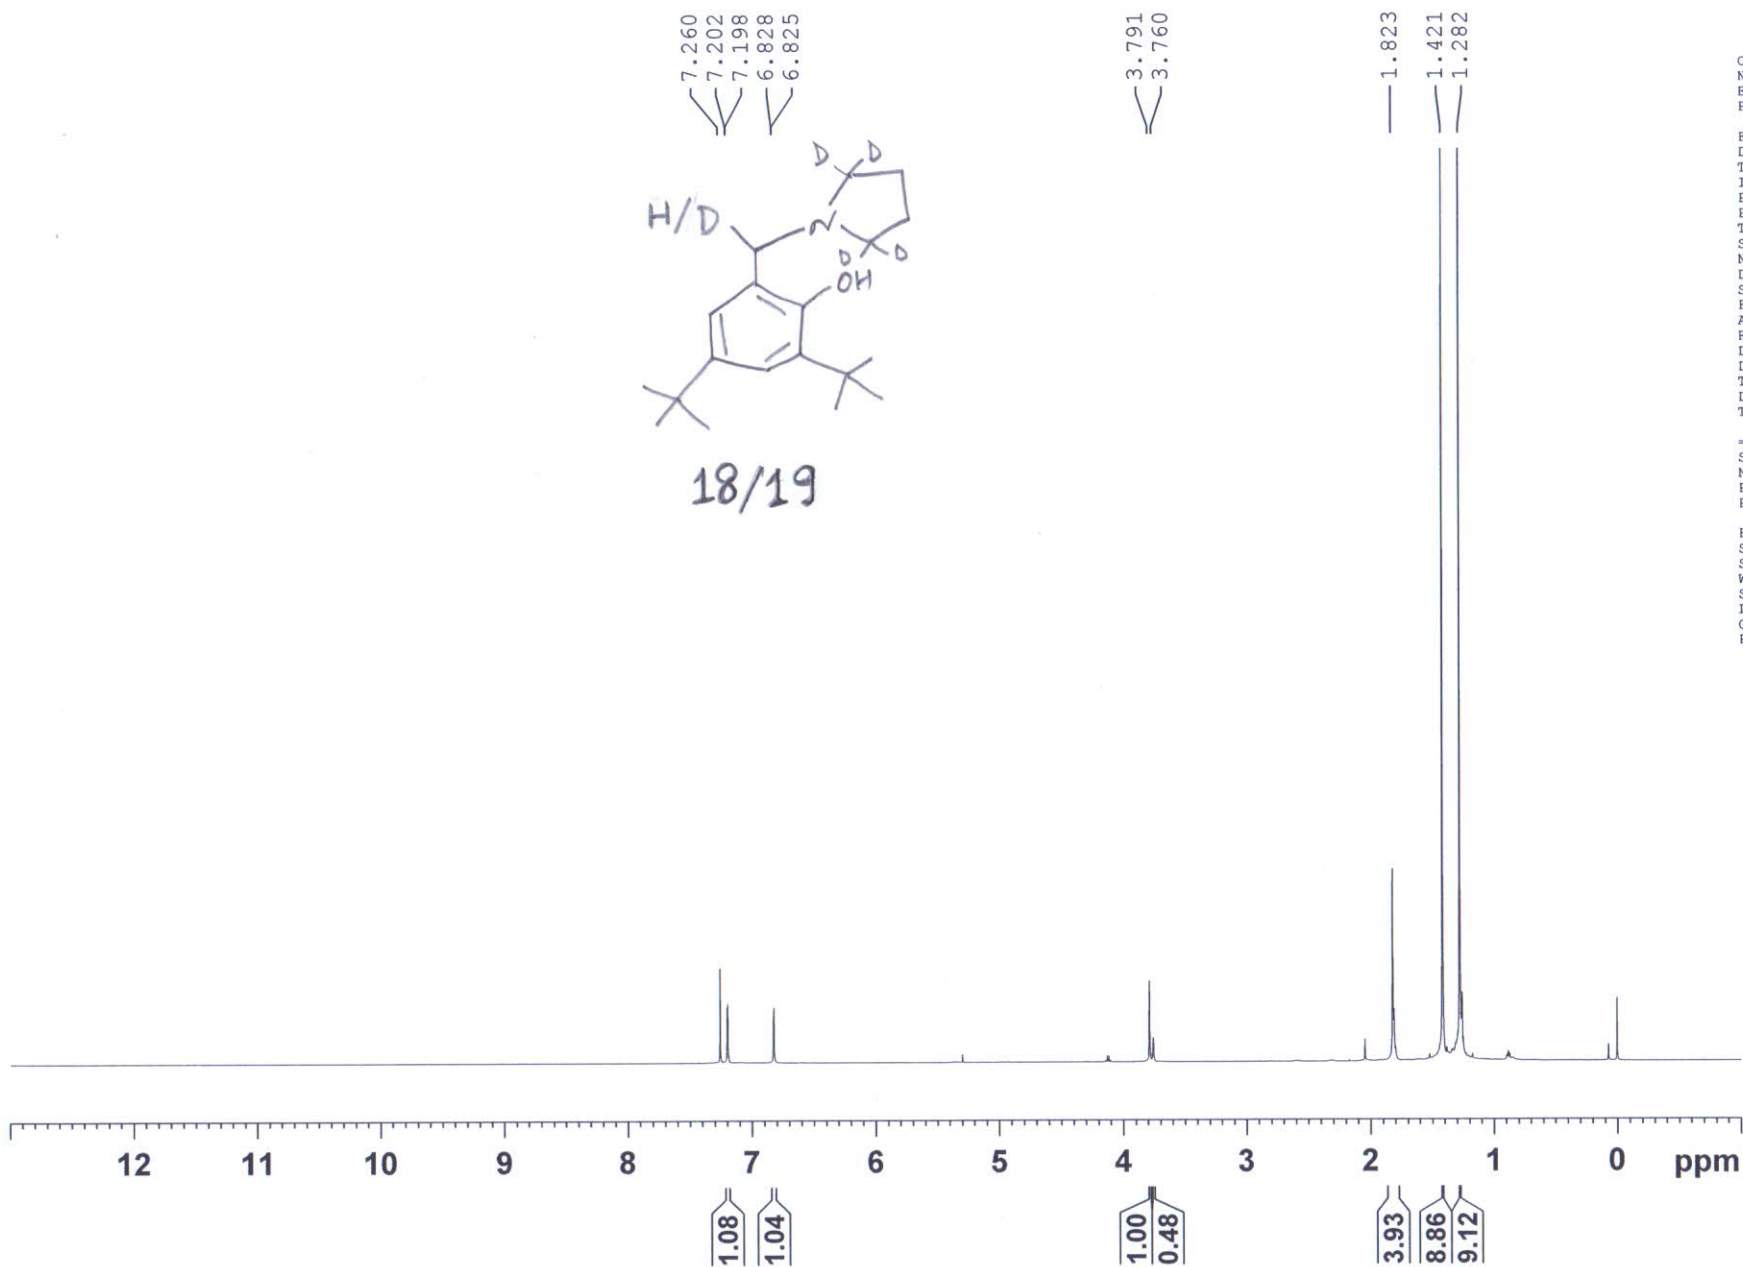

Current Data Parameters  
NAME CKJ-AH-2-30B1-1H  
EXPNO 1  
PROCNO 1

F2 - Acquisition Parameters  
Date\_ 20140430  
Time 17.30  
INSTRUM spect  
PROBHD 5 mm PABBO BB/  
PULPROG zg30  
TD 32768  
SOLVENT CDCl3  
NS 16  
DS 2  
SWH 12019.230 Hz  
FIDRES 0.366798 Hz  
AQ 1.3631488 sec  
RG 89.67  
DW 41.600 usec  
DE 6.50 usec  
TE 300.6 K  
D1 1.00000000 sec  
TDO 1

===== CHANNEL f1 =====  
SF01 600.1737063 MHz  
NUC1 1H  
P1 12.00 usec  
PLW1 21.00000000 W

F2 - Processing parameters  
SI 16384  
SF 600.1700148 MHz  
WDW EM  
SSB 0  
LB 0.30 Hz  
GB 0  
PC 1.00

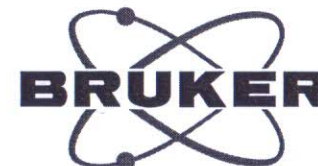

Current Data Parameters  
 NAME CKJ-AH-2-30B1-13C  
 EXPNO 1  
 PROCNO 1

F2 - Acquisition Parameters  
 Date 20140430  
 Time 17.40  
 INSTRUM spect  
 PROBHD 5 mm PABBO BB/  
 PULPROG zgpg30  
 TD 32768  
 SOLVENT CDC13  
 NS 633  
 DS 2  
 SWH 36057.691 Hz  
 FIDRES 1.100393 Hz  
 AQ 0.4543829 sec  
 RG 65.24  
 DW 13.867 usec  
 DE 6.50 usec  
 TE 301.4 K  
 D1 2.00000000 sec  
 D11 0.03000000 sec  
 TD0 1

==== CHANNEL f1 =====  
 SFO1 150.9279571 MHz  
 NUC1 13C  
 P1 10.50 usec  
 PLW1 95.00000000 W

==== CHANNEL f2 =====  
 SFO2 600.1724007 MHz  
 NUC2 1H  
 CPDPRG[2] waltz16  
 PCPD2 70.00 usec  
 PLW2 21.00000000 W  
 PLW12 0.61714000 W  
 PLW13 0.30239999 W

F2 - Processing parameters  
 SI 16384  
 SF 150.9128315 MHz  
 WDW EM  
 SSB 0  
 LB 1.00 Hz  
 GB 0  
 PC 1.40

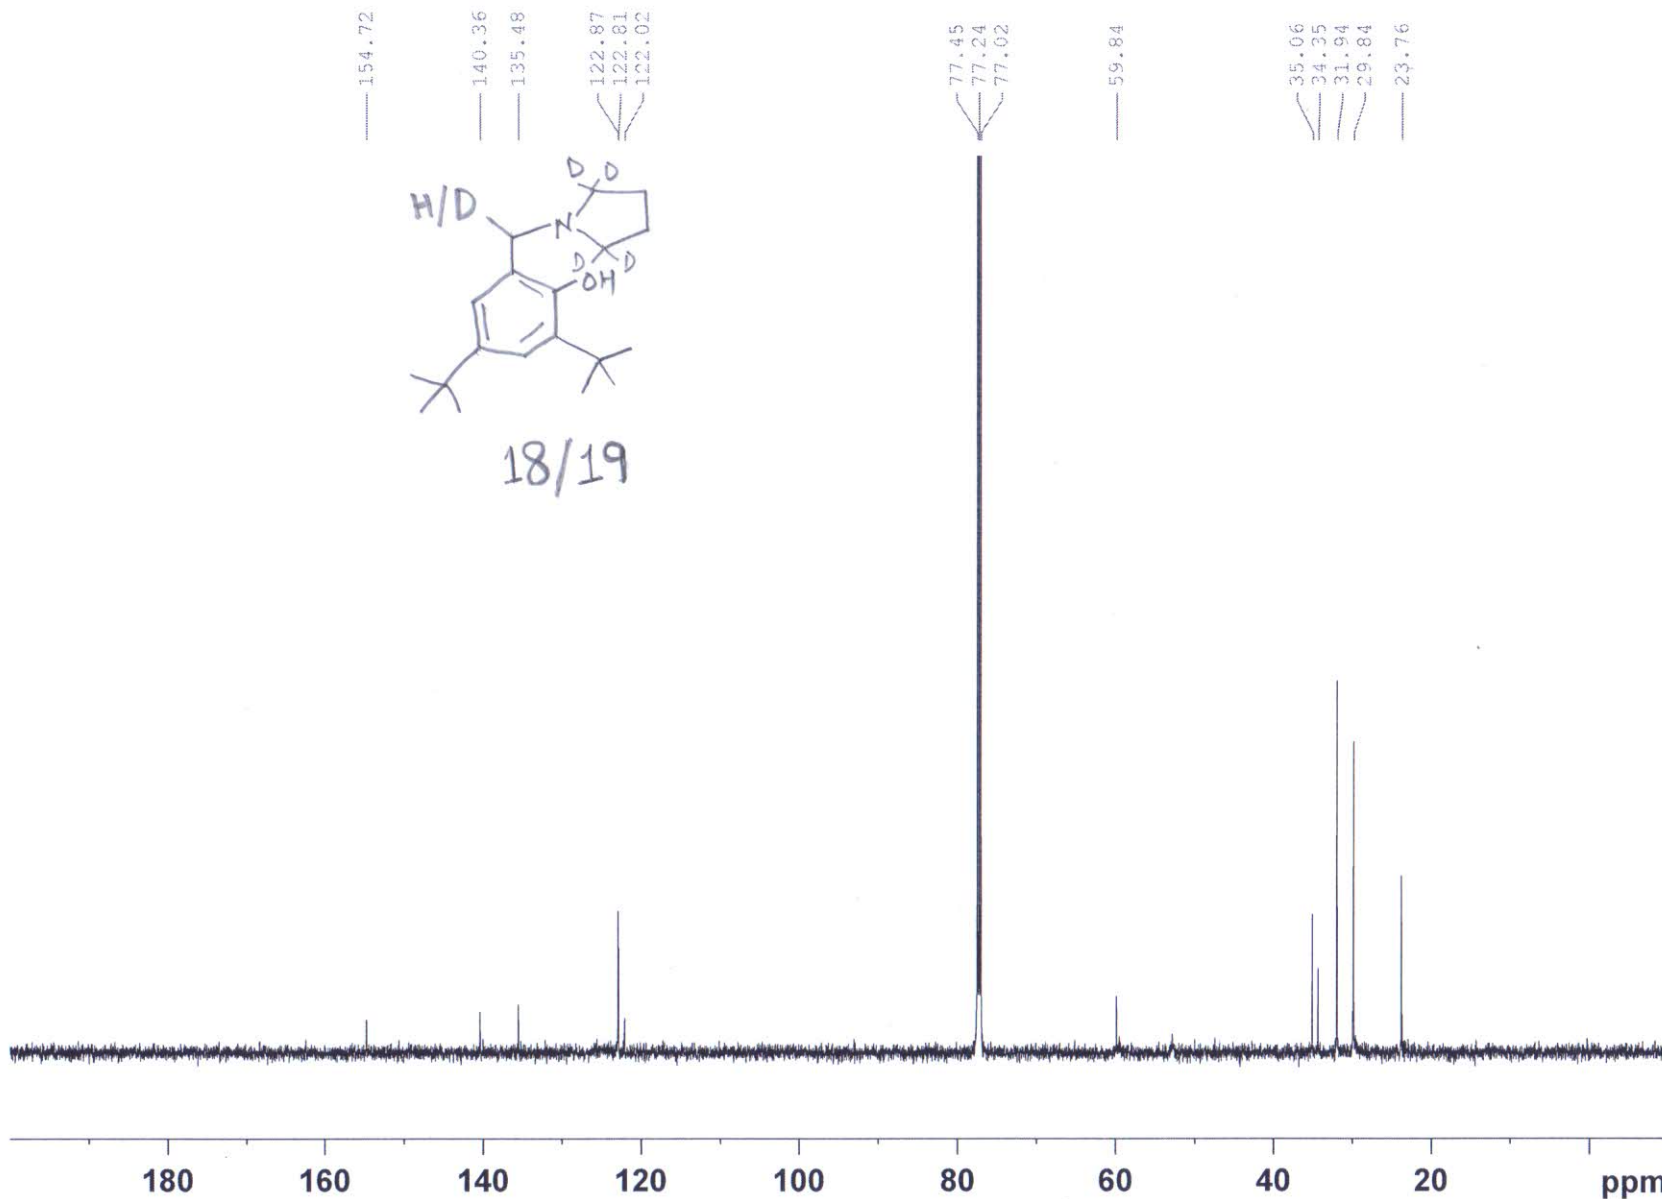

Supplement: c4ra05045b1.pdf [file c4ra05045b1.pdf]
